# Supplementary material for: Pathogen-induced alterations in methylome during Lr48-mediated APR in wheat (Triticum aestivum L.)&nbsp;
Source: Research Square preprint supplement (doi:10.21203/rs.3.rs-336817/v1), 2021-03-23
Supplement: Supplementary file 1 [file 1f680613947871d956ef9890.xls]

## Sheet: Sheet1
Supplementary Table S18. List of hypermethylated genes in R96 when compared to S96 in S96 vs R96 and their gene ontology analysis
Gene stable ID	GO term name	GO domain	GO term accession	Interpro Short Description
TraesCS1B02G033000	oxidation-reduction process	biological_process	GO:0055114	Cu-oxidase
TraesCS1B02G033000	oxidation-reduction process	biological_process	GO:0055114	Cupredoxin
TraesCS1B02G033000	oxidation-reduction process	biological_process	GO:0055114	Cu-oxidase_2
TraesCS1B02G033000	oxidation-reduction process	biological_process	GO:0055114	Cu-oxidase_3
TraesCS1D02G205100	oxidation-reduction process	biological_process	GO:0055114	NADH_UbQ_OxRdtase-like_20kDa
TraesCS1D02G205100	oxidation-reduction process	biological_process	GO:0055114	NADH_UQ_OxRdtase_20Kd_su
TraesCS2A02G210900	translation	biological_process	GO:0006412	Ribosomal_L23/L25_CS
TraesCS2A02G210900	translation	biological_process	GO:0006412	Nucleotide-bd_a/b_plait_sf
TraesCS2A02G210900	translation	biological_process	GO:0006412	Ribosomal_L23/L15e_core_dom_sf
TraesCS2A02G210900	translation	biological_process	GO:0006412	Ribosomal_L25/23
TraesCS2B02G487500	photosynthesis	biological_process	GO:0015979	TPR_1
TraesCS2B02G487500	photosynthesis	biological_process	GO:0015979	TPR-like_helical_dom_sf
TraesCS2B02G487500	photosynthesis	biological_process	GO:0015979	TPR-contain_dom
TraesCS2B02G487500	photosynthesis	biological_process	GO:0015979	TPR_repeat
TraesCS2B02G487500	photosynthesis	biological_process	GO:0015979	PSI_Ycf3_assembly
TraesCS2D02G564500	mitochondrial electron transport, ubiquinol to cytochrome c	biological_process	GO:0006122	Cyt_b/b6_N
TraesCS2D02G564500	mitochondrial electron transport, ubiquinol to cytochrome c	biological_process	GO:0006122	Cyt_b/b6_C
TraesCS2D02G564500	mitochondrial electron transport, ubiquinol to cytochrome c	biological_process	GO:0006122	Di-haem_cyt_TM
TraesCS2D02G564500	mitochondrial electron transport, ubiquinol to cytochrome c	biological_process	GO:0006122	Cytb/b6-like_sf
TraesCS2D02G564500	mitochondrial electron transport, ubiquinol to cytochrome c	biological_process	GO:0006122	Cytochrome_b
TraesCS2D02G564500	mitochondrial electron transport, ubiquinol to cytochrome c	biological_process	GO:0006122	Cyt_b/b6_C_sf
TraesCS2D02G564500	respiratory electron transport chain	biological_process	GO:0022904	Cyt_b/b6_N
TraesCS2D02G564500	respiratory electron transport chain	biological_process	GO:0022904	Cyt_b/b6_C
TraesCS2D02G564500	respiratory electron transport chain	biological_process	GO:0022904	Di-haem_cyt_TM
TraesCS2D02G564500	respiratory electron transport chain	biological_process	GO:0022904	Cytb/b6-like_sf
TraesCS2D02G564500	respiratory electron transport chain	biological_process	GO:0022904	Cytochrome_b
TraesCS2D02G564500	respiratory electron transport chain	biological_process	GO:0022904	Cyt_b/b6_C_sf
TraesCS2D02G569300	respiratory electron transport chain	biological_process	GO:0022904	Cyt_c_oxidase-like_su3
TraesCS2D02G569300	respiratory electron transport chain	biological_process	GO:0022904	Cyt_c_oxidase_su3_a-hlx
TraesCS2D02G569300	respiratory electron transport chain	biological_process	GO:0022904	Cyt_c/ubiquinol_Oxase_su3
TraesCS2D02G569300	respiratory electron transport chain	biological_process	GO:0022904	Cyt_c_oxase_su3_dom
TraesCS2D02G569300	respiratory electron transport chain	biological_process	GO:0022904	Cyt_c_oxidase_su3-like_sf
TraesCS2D02G569300	aerobic electron transport chain	biological_process	GO:0019646	Cyt_c_oxidase-like_su3
TraesCS2D02G569300	aerobic electron transport chain	biological_process	GO:0019646	Cyt_c_oxidase_su3_a-hlx
TraesCS2D02G569300	aerobic electron transport chain	biological_process	GO:0019646	Cyt_c/ubiquinol_Oxase_su3
TraesCS2D02G569300	aerobic electron transport chain	biological_process	GO:0019646	Cyt_c_oxase_su3_dom
TraesCS2D02G569300	aerobic electron transport chain	biological_process	GO:0019646	Cyt_c_oxidase_su3-like_sf
TraesCS2D02G572900	photosynthetic electron transport chain	biological_process	GO:0009767	PS_antenna-like
TraesCS2D02G572900	photosynthetic electron transport chain	biological_process	GO:0009767	PS_II_antenna-like_sf
TraesCS2D02G572900	photosynthesis, light reaction	biological_process	GO:0019684	PS_antenna-like
TraesCS2D02G572900	photosynthesis, light reaction	biological_process	GO:0019684	PS_II_antenna-like_sf
TraesCS2D02G572900	photosynthesis	biological_process	GO:0015979	PS_antenna-like
TraesCS2D02G572900	photosynthesis	biological_process	GO:0015979	PS_II_antenna-like_sf
TraesCS2D02G572900	protein-chromophore linkage	biological_process	GO:0018298	PS_antenna-like
TraesCS2D02G572900	protein-chromophore linkage	biological_process	GO:0018298	PS_II_antenna-like_sf
TraesCS2D02G572900	photosynthetic electron transport in photosystem II	biological_process	GO:0009772	PS_antenna-like
TraesCS2D02G572900	photosynthetic electron transport in photosystem II	biological_process	GO:0009772	PS_II_antenna-like_sf
TraesCS3B02G121700	translation	biological_process	GO:0006412	Ribosomal_S5/S7
TraesCS3B02G121700	translation	biological_process	GO:0006412	Ribosomal_S7_bac/org-type
TraesCS3B02G121700	translation	biological_process	GO:0006412	Ribosomal_S7_dom
TraesCS3B02G121700	translation	biological_process	GO:0006412	RPS7_plant
TraesCS3B02G121700	translation	biological_process	GO:0006412	Ribosomal_S7_dom_sf
TraesCS3B02G185500	photosynthesis	biological_process	GO:0015979	PSI_PsaA/B
TraesCS3B02G185500	photosynthesis	biological_process	GO:0015979	PSI_PsaA
TraesCS3B02G185500	photosynthesis	biological_process	GO:0015979	PSI_PsaA/B_CS
TraesCS3B02G185500	photosynthesis	biological_process	GO:0015979	PSI_PsaA/B_sf
TraesCS3D02G499500	translation	biological_process	GO:0006412	Ribosomal_L2
TraesCS3D02G499500	translation	biological_process	GO:0006412	Ribosomal_L2_bac/org-type
TraesCS3D02G499500	translation	biological_process	GO:0006412	Translation_prot_SH3-like_sf
TraesCS3D02G499500	translation	biological_process	GO:0006412	Rib_L2_dom2
TraesCS3D02G499500	translation	biological_process	GO:0006412	Ribosomal_L2_dom3
TraesCS3D02G499500	translation	biological_process	GO:0006412	Ribosomal_L2_C
TraesCS3D02G499500	translation	biological_process	GO:0006412	Ribosomal_L2_CS
TraesCS4D02G137400	electron transport chain	biological_process	GO:0022900	CcO_II-like_C
TraesCS4D02G137400	electron transport chain	biological_process	GO:0022900	Cupredoxin
TraesCS4D02G137400	electron transport chain	biological_process	GO:0022900	Cyt_c_oxidase_su2_TM_dom
TraesCS4D02G137400	electron transport chain	biological_process	GO:0022900	CcO_II_C
TraesCS4D02G137400	electron transport chain	biological_process	GO:0022900	Cyt_c_oxidase_su2_TM_sf
TraesCS4D02G138800	oxidation-reduction process	biological_process	GO:0055114	NADH_Q_OxRdtase_suD
TraesCS4D02G138800	oxidation-reduction process	biological_process	GO:0055114	NiFe-Hase_large
TraesCS4D02G138800	oxidation-reduction process	biological_process	GO:0055114	NADH_Q_OxRdtase_suD_sf
TraesCS5A02G160200	transmembrane transport	biological_process	GO:0055085	Cit_transptr-like_dom
TraesCS7A02G099400	translation	biological_process	GO:0006412	Ribosomal_S12_bac
TraesCS7A02G099400	translation	biological_process	GO:0006412	Ribosomal_S12/S23
TraesCS7A02G099400	translation	biological_process	GO:0006412	NA-bd_OB-fold
TraesCS7B02G429200	translation	biological_process	GO:0006412	Ribosomal_S13
TraesCS7B02G429200	translation	biological_process	GO:0006412	Ribosomal_S13-like_H2TH
TraesCS7B02G429200	translation	biological_process	GO:0006412	30s_Rbsml_prot_S13_C
TraesCSU02G000100	biosynthetic process	biological_process	GO:0009058	Chalcone/stilbene_synthase_N
TraesCSU02G000100	biosynthetic process	biological_process	GO:0009058	Polyketide_synthase_type-III
TraesCSU02G000100	biosynthetic process	biological_process	GO:0009058	Chalcone/stilbene_synth_C
TraesCSU02G000100	biosynthetic process	biological_process	GO:0009058	Thiolase-like
TraesCSU02G270500	oxidation-reduction process	biological_process	GO:0055114	NADH_UbQ_OxRdtase_30kDa_su
TraesCSU02G270500	oxidation-reduction process	biological_process	GO:0055114	NADH_quin_OxRdtase_su_C/D-like
TraesCS1B02G150800	integral component of membrane	cellular_component	GO:0016021	CASTOR/POLLUX/SYM8
TraesCS2A02G210900	ribosome	cellular_component	GO:0005840	Ribosomal_L23/L25_CS
TraesCS2A02G210900	ribosome	cellular_component	GO:0005840	Nucleotide-bd_a/b_plait_sf
TraesCS2A02G210900	ribosome	cellular_component	GO:0005840	Ribosomal_L23/L15e_core_dom_sf
TraesCS2A02G210900	ribosome	cellular_component	GO:0005840	Ribosomal_L25/23
TraesCS2B02G487500	chloroplast	cellular_component	GO:0009507	TPR_1
TraesCS2B02G487500	chloroplast	cellular_component	GO:0009507	TPR-like_helical_dom_sf
TraesCS2B02G487500	chloroplast	cellular_component	GO:0009507	TPR-contain_dom
TraesCS2B02G487500	chloroplast	cellular_component	GO:0009507	TPR_repeat
TraesCS2B02G487500	chloroplast	cellular_component	GO:0009507	PSI_Ycf3_assembly
TraesCS2B02G487500	thylakoid	cellular_component	GO:0009579	TPR_1
TraesCS2B02G487500	thylakoid	cellular_component	GO:0009579	TPR-like_helical_dom_sf
TraesCS2B02G487500	thylakoid	cellular_component	GO:0009579	TPR-contain_dom
TraesCS2B02G487500	thylakoid	cellular_component	GO:0009579	TPR_repeat
TraesCS2B02G487500	thylakoid	cellular_component	GO:0009579	PSI_Ycf3_assembly
TraesCS2B02G487500	chloroplast thylakoid membrane	cellular_component	GO:0009535	TPR_1
TraesCS2B02G487500	chloroplast thylakoid membrane	cellular_component	GO:0009535	TPR-like_helical_dom_sf
TraesCS2B02G487500	chloroplast thylakoid membrane	cellular_component	GO:0009535	TPR-contain_dom
TraesCS2B02G487500	chloroplast thylakoid membrane	cellular_component	GO:0009535	TPR_repeat
TraesCS2B02G487500	chloroplast thylakoid membrane	cellular_component	GO:0009535	PSI_Ycf3_assembly
TraesCS2B02G487500	membrane	cellular_component	GO:0016020	TPR_1
TraesCS2B02G487500	membrane	cellular_component	GO:0016020	TPR-like_helical_dom_sf
TraesCS2B02G487500	membrane	cellular_component	GO:0016020	TPR-contain_dom
TraesCS2B02G487500	membrane	cellular_component	GO:0016020	TPR_repeat
TraesCS2B02G487500	membrane	cellular_component	GO:0016020	PSI_Ycf3_assembly
TraesCS2B02G487500	plastid	cellular_component	GO:0009536	TPR_1
TraesCS2B02G487500	plastid	cellular_component	GO:0009536	TPR-like_helical_dom_sf
TraesCS2B02G487500	plastid	cellular_component	GO:0009536	TPR-contain_dom
TraesCS2B02G487500	plastid	cellular_component	GO:0009536	TPR_repeat
TraesCS2B02G487500	plastid	cellular_component	GO:0009536	PSI_Ycf3_assembly
TraesCS2D02G564500	membrane	cellular_component	GO:0016020	Cyt_b/b6_N
TraesCS2D02G564500	membrane	cellular_component	GO:0016020	Cyt_b/b6_C
TraesCS2D02G564500	membrane	cellular_component	GO:0016020	Di-haem_cyt_TM
TraesCS2D02G564500	membrane	cellular_component	GO:0016020	Cytb/b6-like_sf
TraesCS2D02G564500	membrane	cellular_component	GO:0016020	Cytochrome_b
TraesCS2D02G564500	membrane	cellular_component	GO:0016020	Cyt_b/b6_C_sf
TraesCS2D02G564500	respiratory chain complex III	cellular_component	GO:0045275	Cyt_b/b6_N
TraesCS2D02G564500	respiratory chain complex III	cellular_component	GO:0045275	Cyt_b/b6_C
TraesCS2D02G564500	respiratory chain complex III	cellular_component	GO:0045275	Di-haem_cyt_TM
TraesCS2D02G564500	respiratory chain complex III	cellular_component	GO:0045275	Cytb/b6-like_sf
TraesCS2D02G564500	respiratory chain complex III	cellular_component	GO:0045275	Cytochrome_b
TraesCS2D02G564500	respiratory chain complex III	cellular_component	GO:0045275	Cyt_b/b6_C_sf
TraesCS2D02G569300	membrane	cellular_component	GO:0016020	Cyt_c_oxidase-like_su3
TraesCS2D02G569300	membrane	cellular_component	GO:0016020	Cyt_c_oxidase_su3_a-hlx
TraesCS2D02G569300	membrane	cellular_component	GO:0016020	Cyt_c/ubiquinol_Oxase_su3
TraesCS2D02G569300	membrane	cellular_component	GO:0016020	Cyt_c_oxase_su3_dom
TraesCS2D02G569300	membrane	cellular_component	GO:0016020	Cyt_c_oxidase_su3-like_sf
TraesCS2D02G572900	membrane	cellular_component	GO:0016020	PS_antenna-like
TraesCS2D02G572900	membrane	cellular_component	GO:0016020	PS_II_antenna-like_sf
TraesCS2D02G572900	chloroplast	cellular_component	GO:0009507	PS_antenna-like
TraesCS2D02G572900	chloroplast	cellular_component	GO:0009507	PS_II_antenna-like_sf
TraesCS2D02G572900	thylakoid	cellular_component	GO:0009579	PS_antenna-like
TraesCS2D02G572900	thylakoid	cellular_component	GO:0009579	PS_II_antenna-like_sf
TraesCS2D02G572900	integral component of membrane	cellular_component	GO:0016021	PS_antenna-like
TraesCS2D02G572900	integral component of membrane	cellular_component	GO:0016021	PS_II_antenna-like_sf
TraesCS2D02G572900	chloroplast thylakoid membrane	cellular_component	GO:0009535	PS_antenna-like
TraesCS2D02G572900	chloroplast thylakoid membrane	cellular_component	GO:0009535	PS_II_antenna-like_sf
TraesCS2D02G572900	plastid	cellular_component	GO:0009536	PS_antenna-like
TraesCS2D02G572900	plastid	cellular_component	GO:0009536	PS_II_antenna-like_sf
TraesCS2D02G572900	photosystem II	cellular_component	GO:0009523	PS_antenna-like
TraesCS2D02G572900	photosystem II	cellular_component	GO:0009523	PS_II_antenna-like_sf
TraesCS2D02G572900	photosystem	cellular_component	GO:0009521	PS_antenna-like
TraesCS2D02G572900	photosystem	cellular_component	GO:0009521	PS_II_antenna-like_sf
TraesCS3B02G025900	nucleus	cellular_component	GO:0005634	Histone_H3/CENP-A
TraesCS3B02G025900	nucleus	cellular_component	GO:0005634	Histone_H2A/H2B/H3
TraesCS3B02G025900	nucleus	cellular_component	GO:0005634	Histone-fold
TraesCS3B02G025900	nucleosome	cellular_component	GO:0000786	Histone_H3/CENP-A
TraesCS3B02G025900	nucleosome	cellular_component	GO:0000786	Histone_H2A/H2B/H3
TraesCS3B02G025900	nucleosome	cellular_component	GO:0000786	Histone-fold
TraesCS3B02G025900	chromosome	cellular_component	GO:0005694	Histone_H3/CENP-A
TraesCS3B02G025900	chromosome	cellular_component	GO:0005694	Histone_H2A/H2B/H3
TraesCS3B02G025900	chromosome	cellular_component	GO:0005694	Histone-fold
TraesCS3B02G121700	small ribosomal subunit	cellular_component	GO:0015935	Ribosomal_S5/S7
TraesCS3B02G121700	small ribosomal subunit	cellular_component	GO:0015935	Ribosomal_S7_bac/org-type
TraesCS3B02G121700	small ribosomal subunit	cellular_component	GO:0015935	Ribosomal_S7_dom
TraesCS3B02G121700	small ribosomal subunit	cellular_component	GO:0015935	RPS7_plant
TraesCS3B02G121700	small ribosomal subunit	cellular_component	GO:0015935	Ribosomal_S7_dom_sf
TraesCS3B02G121700	mitochondrial small ribosomal subunit	cellular_component	GO:0005763	Ribosomal_S5/S7
TraesCS3B02G121700	mitochondrial small ribosomal subunit	cellular_component	GO:0005763	Ribosomal_S7_bac/org-type
TraesCS3B02G121700	mitochondrial small ribosomal subunit	cellular_component	GO:0005763	Ribosomal_S7_dom
TraesCS3B02G121700	mitochondrial small ribosomal subunit	cellular_component	GO:0005763	RPS7_plant
TraesCS3B02G121700	mitochondrial small ribosomal subunit	cellular_component	GO:0005763	Ribosomal_S7_dom_sf
TraesCS3B02G185500	integral component of membrane	cellular_component	GO:0016021	PSI_PsaA/B
TraesCS3B02G185500	integral component of membrane	cellular_component	GO:0016021	PSI_PsaA
TraesCS3B02G185500	integral component of membrane	cellular_component	GO:0016021	PSI_PsaA/B_CS
TraesCS3B02G185500	integral component of membrane	cellular_component	GO:0016021	PSI_PsaA/B_sf
TraesCS3B02G185500	thylakoid	cellular_component	GO:0009579	PSI_PsaA/B
TraesCS3B02G185500	thylakoid	cellular_component	GO:0009579	PSI_PsaA
TraesCS3B02G185500	thylakoid	cellular_component	GO:0009579	PSI_PsaA/B_CS
TraesCS3B02G185500	thylakoid	cellular_component	GO:0009579	PSI_PsaA/B_sf
TraesCS3B02G185500	chloroplast	cellular_component	GO:0009507	PSI_PsaA/B
TraesCS3B02G185500	chloroplast	cellular_component	GO:0009507	PSI_PsaA
TraesCS3B02G185500	chloroplast	cellular_component	GO:0009507	PSI_PsaA/B_CS
TraesCS3B02G185500	chloroplast	cellular_component	GO:0009507	PSI_PsaA/B_sf
TraesCS3B02G185500	membrane	cellular_component	GO:0016020	PSI_PsaA/B
TraesCS3B02G185500	membrane	cellular_component	GO:0016020	PSI_PsaA
TraesCS3B02G185500	membrane	cellular_component	GO:0016020	PSI_PsaA/B_CS
TraesCS3B02G185500	membrane	cellular_component	GO:0016020	PSI_PsaA/B_sf
TraesCS3B02G185500	plastid	cellular_component	GO:0009536	PSI_PsaA/B
TraesCS3B02G185500	plastid	cellular_component	GO:0009536	PSI_PsaA
TraesCS3B02G185500	plastid	cellular_component	GO:0009536	PSI_PsaA/B_CS
TraesCS3B02G185500	plastid	cellular_component	GO:0009536	PSI_PsaA/B_sf
TraesCS3D02G499400	chloroplast	cellular_component	GO:0009507	YCF72
TraesCS3D02G499500	large ribosomal subunit	cellular_component	GO:0015934	Ribosomal_L2
TraesCS3D02G499500	large ribosomal subunit	cellular_component	GO:0015934	Ribosomal_L2_bac/org-type
TraesCS3D02G499500	large ribosomal subunit	cellular_component	GO:0015934	Translation_prot_SH3-like_sf
TraesCS3D02G499500	large ribosomal subunit	cellular_component	GO:0015934	Rib_L2_dom2
TraesCS3D02G499500	large ribosomal subunit	cellular_component	GO:0015934	Ribosomal_L2_dom3
TraesCS3D02G499500	large ribosomal subunit	cellular_component	GO:0015934	Ribosomal_L2_C
TraesCS3D02G499500	large ribosomal subunit	cellular_component	GO:0015934	Ribosomal_L2_CS
TraesCS3D02G499500	ribosome	cellular_component	GO:0005840	Ribosomal_L2
TraesCS3D02G499500	ribosome	cellular_component	GO:0005840	Ribosomal_L2_bac/org-type
TraesCS3D02G499500	ribosome	cellular_component	GO:0005840	Translation_prot_SH3-like_sf
TraesCS3D02G499500	ribosome	cellular_component	GO:0005840	Rib_L2_dom2
TraesCS3D02G499500	ribosome	cellular_component	GO:0005840	Ribosomal_L2_dom3
TraesCS3D02G499500	ribosome	cellular_component	GO:0005840	Ribosomal_L2_C
TraesCS3D02G499500	ribosome	cellular_component	GO:0005840	Ribosomal_L2_CS
TraesCS4D02G137400	integral component of membrane	cellular_component	GO:0016021	CcO_II-like_C
TraesCS4D02G137400	integral component of membrane	cellular_component	GO:0016021	Cupredoxin
TraesCS4D02G137400	integral component of membrane	cellular_component	GO:0016021	Cyt_c_oxidase_su2_TM_dom
TraesCS4D02G137400	integral component of membrane	cellular_component	GO:0016021	CcO_II_C
TraesCS4D02G137400	integral component of membrane	cellular_component	GO:0016021	Cyt_c_oxidase_su2_TM_sf
TraesCS4D02G137400	membrane	cellular_component	GO:0016020	CcO_II-like_C
TraesCS4D02G137400	membrane	cellular_component	GO:0016020	Cupredoxin
TraesCS4D02G137400	membrane	cellular_component	GO:0016020	Cyt_c_oxidase_su2_TM_dom
TraesCS4D02G137400	membrane	cellular_component	GO:0016020	CcO_II_C
TraesCS4D02G137400	membrane	cellular_component	GO:0016020	Cyt_c_oxidase_su2_TM_sf
TraesCS5A02G160200	integral component of membrane	cellular_component	GO:0016021	Cit_transptr-like_dom
TraesCS7A02G099400	ribosome	cellular_component	GO:0005840	Ribosomal_S12_bac
TraesCS7A02G099400	ribosome	cellular_component	GO:0005840	Ribosomal_S12/S23
TraesCS7A02G099400	ribosome	cellular_component	GO:0005840	NA-bd_OB-fold
TraesCS7A02G099400	mitochondrion	cellular_component	GO:0005739	Ribosomal_S12_bac
TraesCS7A02G099400	mitochondrion	cellular_component	GO:0005739	Ribosomal_S12/S23
TraesCS7A02G099400	mitochondrion	cellular_component	GO:0005739	NA-bd_OB-fold
TraesCS7A02G099400	small ribosomal subunit	cellular_component	GO:0015935	Ribosomal_S12_bac
TraesCS7A02G099400	small ribosomal subunit	cellular_component	GO:0015935	Ribosomal_S12/S23
TraesCS7A02G099400	small ribosomal subunit	cellular_component	GO:0015935	NA-bd_OB-fold
TraesCS7B02G429200	ribosome	cellular_component	GO:0005840	Ribosomal_S13
TraesCS7B02G429200	ribosome	cellular_component	GO:0005840	Ribosomal_S13-like_H2TH
TraesCS7B02G429200	ribosome	cellular_component	GO:0005840	30s_Rbsml_prot_S13_C
TraesCS1B02G033000	copper ion binding	molecular_function	GO:0005507	Cu-oxidase
TraesCS1B02G033000	copper ion binding	molecular_function	GO:0005507	Cupredoxin
TraesCS1B02G033000	copper ion binding	molecular_function	GO:0005507	Cu-oxidase_2
TraesCS1B02G033000	copper ion binding	molecular_function	GO:0005507	Cu-oxidase_3
TraesCS1B02G033000	oxidoreductase activity	molecular_function	GO:0016491	Cu-oxidase
TraesCS1B02G033000	oxidoreductase activity	molecular_function	GO:0016491	Cupredoxin
TraesCS1B02G033000	oxidoreductase activity	molecular_function	GO:0016491	Cu-oxidase_2
TraesCS1B02G033000	oxidoreductase activity	molecular_function	GO:0016491	Cu-oxidase_3
TraesCS1D02G205100	quinone binding	molecular_function	GO:0048038	NADH_UbQ_OxRdtase-like_20kDa
TraesCS1D02G205100	quinone binding	molecular_function	GO:0048038	NADH_UQ_OxRdtase_20Kd_su
TraesCS1D02G205100	NADH dehydrogenase (ubiquinone) activity	molecular_function	GO:0008137	NADH_UbQ_OxRdtase-like_20kDa
TraesCS1D02G205100	NADH dehydrogenase (ubiquinone) activity	molecular_function	GO:0008137	NADH_UQ_OxRdtase_20Kd_su
TraesCS1D02G205100	4 iron, 4 sulfur cluster binding	molecular_function	GO:0051539	NADH_UbQ_OxRdtase-like_20kDa
TraesCS1D02G205100	4 iron, 4 sulfur cluster binding	molecular_function	GO:0051539	NADH_UQ_OxRdtase_20Kd_su
TraesCS1D02G205100	iron-sulfur cluster binding	molecular_function	GO:0051536	NADH_UbQ_OxRdtase-like_20kDa
TraesCS1D02G205100	iron-sulfur cluster binding	molecular_function	GO:0051536	NADH_UQ_OxRdtase_20Kd_su
TraesCS2A02G210900	structural constituent of ribosome	molecular_function	GO:0003735	Ribosomal_L23/L25_CS
TraesCS2A02G210900	structural constituent of ribosome	molecular_function	GO:0003735	Nucleotide-bd_a/b_plait_sf
TraesCS2A02G210900	structural constituent of ribosome	molecular_function	GO:0003735	Ribosomal_L23/L15e_core_dom_sf
TraesCS2A02G210900	structural constituent of ribosome	molecular_function	GO:0003735	Ribosomal_L25/23
TraesCS2B02G487500	protein binding	molecular_function	GO:0005515	TPR_1
TraesCS2B02G487500	protein binding	molecular_function	GO:0005515	TPR-like_helical_dom_sf
TraesCS2B02G487500	protein binding	molecular_function	GO:0005515	TPR-contain_dom
TraesCS2B02G487500	protein binding	molecular_function	GO:0005515	TPR_repeat
TraesCS2B02G487500	protein binding	molecular_function	GO:0005515	PSI_Ycf3_assembly
TraesCS2B02G497900	DNA binding	molecular_function	GO:0003677	B3_DNA-bd
TraesCS2B02G497900	DNA binding	molecular_function	GO:0003677	DNA-bd_pseudobarrel_sf
TraesCS2D02G564500	oxidoreductase activity	molecular_function	GO:0016491	Cyt_b/b6_N
TraesCS2D02G564500	oxidoreductase activity	molecular_function	GO:0016491	Cyt_b/b6_C
TraesCS2D02G564500	oxidoreductase activity	molecular_function	GO:0016491	Di-haem_cyt_TM
TraesCS2D02G564500	oxidoreductase activity	molecular_function	GO:0016491	Cytb/b6-like_sf
TraesCS2D02G564500	oxidoreductase activity	molecular_function	GO:0016491	Cytochrome_b
TraesCS2D02G564500	oxidoreductase activity	molecular_function	GO:0016491	Cyt_b/b6_C_sf
TraesCS2D02G564500	electron transfer activity	molecular_function	GO:0009055	Cyt_b/b6_N
TraesCS2D02G564500	electron transfer activity	molecular_function	GO:0009055	Cyt_b/b6_C
TraesCS2D02G564500	electron transfer activity	molecular_function	GO:0009055	Di-haem_cyt_TM
TraesCS2D02G564500	electron transfer activity	molecular_function	GO:0009055	Cytb/b6-like_sf
TraesCS2D02G564500	electron transfer activity	molecular_function	GO:0009055	Cytochrome_b
TraesCS2D02G564500	electron transfer activity	molecular_function	GO:0009055	Cyt_b/b6_C_sf
TraesCS2D02G564500	ubiquinol-cytochrome-c reductase activity	molecular_function	GO:0008121	Cyt_b/b6_N
TraesCS2D02G564500	ubiquinol-cytochrome-c reductase activity	molecular_function	GO:0008121	Cyt_b/b6_C
TraesCS2D02G564500	ubiquinol-cytochrome-c reductase activity	molecular_function	GO:0008121	Di-haem_cyt_TM
TraesCS2D02G564500	ubiquinol-cytochrome-c reductase activity	molecular_function	GO:0008121	Cytb/b6-like_sf
TraesCS2D02G564500	ubiquinol-cytochrome-c reductase activity	molecular_function	GO:0008121	Cytochrome_b
TraesCS2D02G564500	ubiquinol-cytochrome-c reductase activity	molecular_function	GO:0008121	Cyt_b/b6_C_sf
TraesCS2D02G569300	cytochrome-c oxidase activity	molecular_function	GO:0004129	Cyt_c_oxidase-like_su3
TraesCS2D02G569300	cytochrome-c oxidase activity	molecular_function	GO:0004129	Cyt_c_oxidase_su3_a-hlx
TraesCS2D02G569300	cytochrome-c oxidase activity	molecular_function	GO:0004129	Cyt_c/ubiquinol_Oxase_su3
TraesCS2D02G569300	cytochrome-c oxidase activity	molecular_function	GO:0004129	Cyt_c_oxase_su3_dom
TraesCS2D02G569300	cytochrome-c oxidase activity	molecular_function	GO:0004129	Cyt_c_oxidase_su3-like_sf
TraesCS2D02G569300	heme-copper terminal oxidase activity	molecular_function	GO:0015002	Cyt_c_oxidase-like_su3
TraesCS2D02G569300	heme-copper terminal oxidase activity	molecular_function	GO:0015002	Cyt_c_oxidase_su3_a-hlx
TraesCS2D02G569300	heme-copper terminal oxidase activity	molecular_function	GO:0015002	Cyt_c/ubiquinol_Oxase_su3
TraesCS2D02G569300	heme-copper terminal oxidase activity	molecular_function	GO:0015002	Cyt_c_oxase_su3_dom
TraesCS2D02G569300	heme-copper terminal oxidase activity	molecular_function	GO:0015002	Cyt_c_oxidase_su3-like_sf
TraesCS2D02G572900	chlorophyll binding	molecular_function	GO:0016168	PS_antenna-like
TraesCS2D02G572900	chlorophyll binding	molecular_function	GO:0016168	PS_II_antenna-like_sf
TraesCS2D02G572900	metal ion binding	molecular_function	GO:0046872	PS_antenna-like
TraesCS2D02G572900	metal ion binding	molecular_function	GO:0046872	PS_II_antenna-like_sf
TraesCS2D02G572900	electron transporter, transferring electrons within the cyclic electron transport pathway of photosynthesis activity	molecular_function	GO:0045156	PS_antenna-like
TraesCS2D02G572900	electron transporter, transferring electrons within the cyclic electron transport pathway of photosynthesis activity	molecular_function	GO:0045156	PS_II_antenna-like_sf
TraesCS3B02G025900	DNA binding	molecular_function	GO:0003677	Histone_H3/CENP-A
TraesCS3B02G025900	DNA binding	molecular_function	GO:0003677	Histone_H2A/H2B/H3
TraesCS3B02G025900	DNA binding	molecular_function	GO:0003677	Histone-fold
TraesCS3B02G025900	protein heterodimerization activity	molecular_function	GO:0046982	Histone_H3/CENP-A
TraesCS3B02G025900	protein heterodimerization activity	molecular_function	GO:0046982	Histone_H2A/H2B/H3
TraesCS3B02G025900	protein heterodimerization activity	molecular_function	GO:0046982	Histone-fold
TraesCS3B02G121700	structural constituent of ribosome	molecular_function	GO:0003735	Ribosomal_S5/S7
TraesCS3B02G121700	structural constituent of ribosome	molecular_function	GO:0003735	Ribosomal_S7_bac/org-type
TraesCS3B02G121700	structural constituent of ribosome	molecular_function	GO:0003735	Ribosomal_S7_dom
TraesCS3B02G121700	structural constituent of ribosome	molecular_function	GO:0003735	RPS7_plant
TraesCS3B02G121700	structural constituent of ribosome	molecular_function	GO:0003735	Ribosomal_S7_dom_sf
TraesCS3B02G121700	rRNA binding	molecular_function	GO:0019843	Ribosomal_S5/S7
TraesCS3B02G121700	rRNA binding	molecular_function	GO:0019843	Ribosomal_S7_bac/org-type
TraesCS3B02G121700	rRNA binding	molecular_function	GO:0019843	Ribosomal_S7_dom
TraesCS3B02G121700	rRNA binding	molecular_function	GO:0019843	RPS7_plant
TraesCS3B02G121700	rRNA binding	molecular_function	GO:0019843	Ribosomal_S7_dom_sf
TraesCS3B02G185500	metal ion binding	molecular_function	GO:0046872	PSI_PsaA/B
TraesCS3B02G185500	metal ion binding	molecular_function	GO:0046872	PSI_PsaA
TraesCS3B02G185500	metal ion binding	molecular_function	GO:0046872	PSI_PsaA/B_CS
TraesCS3B02G185500	metal ion binding	molecular_function	GO:0046872	PSI_PsaA/B_sf
TraesCS3D02G499500	transferase activity	molecular_function	GO:0016740	Ribosomal_L2
TraesCS3D02G499500	transferase activity	molecular_function	GO:0016740	Ribosomal_L2_bac/org-type
TraesCS3D02G499500	transferase activity	molecular_function	GO:0016740	Translation_prot_SH3-like_sf
TraesCS3D02G499500	transferase activity	molecular_function	GO:0016740	Rib_L2_dom2
TraesCS3D02G499500	transferase activity	molecular_function	GO:0016740	Ribosomal_L2_dom3
TraesCS3D02G499500	transferase activity	molecular_function	GO:0016740	Ribosomal_L2_C
TraesCS3D02G499500	transferase activity	molecular_function	GO:0016740	Ribosomal_L2_CS
TraesCS3D02G499500	RNA binding	molecular_function	GO:0003723	Ribosomal_L2
TraesCS3D02G499500	RNA binding	molecular_function	GO:0003723	Ribosomal_L2_bac/org-type
TraesCS3D02G499500	RNA binding	molecular_function	GO:0003723	Translation_prot_SH3-like_sf
TraesCS3D02G499500	RNA binding	molecular_function	GO:0003723	Rib_L2_dom2
TraesCS3D02G499500	RNA binding	molecular_function	GO:0003723	Ribosomal_L2_dom3
TraesCS3D02G499500	RNA binding	molecular_function	GO:0003723	Ribosomal_L2_C
TraesCS3D02G499500	RNA binding	molecular_function	GO:0003723	Ribosomal_L2_CS
TraesCS3D02G499500	structural constituent of ribosome	molecular_function	GO:0003735	Ribosomal_L2
TraesCS3D02G499500	structural constituent of ribosome	molecular_function	GO:0003735	Ribosomal_L2_bac/org-type
TraesCS3D02G499500	structural constituent of ribosome	molecular_function	GO:0003735	Translation_prot_SH3-like_sf
TraesCS3D02G499500	structural constituent of ribosome	molecular_function	GO:0003735	Rib_L2_dom2
TraesCS3D02G499500	structural constituent of ribosome	molecular_function	GO:0003735	Ribosomal_L2_dom3
TraesCS3D02G499500	structural constituent of ribosome	molecular_function	GO:0003735	Ribosomal_L2_C
TraesCS3D02G499500	structural constituent of ribosome	molecular_function	GO:0003735	Ribosomal_L2_CS
TraesCS4D02G137400	copper ion binding	molecular_function	GO:0005507	CcO_II-like_C
TraesCS4D02G137400	copper ion binding	molecular_function	GO:0005507	Cupredoxin
TraesCS4D02G137400	copper ion binding	molecular_function	GO:0005507	Cyt_c_oxidase_su2_TM_dom
TraesCS4D02G137400	copper ion binding	molecular_function	GO:0005507	CcO_II_C
TraesCS4D02G137400	copper ion binding	molecular_function	GO:0005507	Cyt_c_oxidase_su2_TM_sf
TraesCS4D02G137400	cytochrome-c oxidase activity	molecular_function	GO:0004129	CcO_II-like_C
TraesCS4D02G137400	cytochrome-c oxidase activity	molecular_function	GO:0004129	Cupredoxin
TraesCS4D02G137400	cytochrome-c oxidase activity	molecular_function	GO:0004129	Cyt_c_oxidase_su2_TM_dom
TraesCS4D02G137400	cytochrome-c oxidase activity	molecular_function	GO:0004129	CcO_II_C
TraesCS4D02G137400	cytochrome-c oxidase activity	molecular_function	GO:0004129	Cyt_c_oxidase_su2_TM_sf
TraesCS4D02G138800	quinone binding	molecular_function	GO:0048038	NADH_Q_OxRdtase_suD
TraesCS4D02G138800	quinone binding	molecular_function	GO:0048038	NiFe-Hase_large
TraesCS4D02G138800	quinone binding	molecular_function	GO:0048038	NADH_Q_OxRdtase_suD_sf
TraesCS4D02G138800	NAD binding	molecular_function	GO:0051287	NADH_Q_OxRdtase_suD
TraesCS4D02G138800	NAD binding	molecular_function	GO:0051287	NiFe-Hase_large
TraesCS4D02G138800	NAD binding	molecular_function	GO:0051287	NADH_Q_OxRdtase_suD_sf
TraesCS4D02G138800	oxidoreductase activity, acting on NAD(P)H	molecular_function	GO:0016651	NADH_Q_OxRdtase_suD
TraesCS4D02G138800	oxidoreductase activity, acting on NAD(P)H	molecular_function	GO:0016651	NiFe-Hase_large
TraesCS4D02G138800	oxidoreductase activity, acting on NAD(P)H	molecular_function	GO:0016651	NADH_Q_OxRdtase_suD_sf
TraesCS7A02G007400	ADP binding	molecular_function	GO:0043531	NB-ARC
TraesCS7A02G007400	ADP binding	molecular_function	GO:0043531	P-loop_NTPase
TraesCS7A02G007400	ADP binding	molecular_function	GO:0043531	LRR_dom_sf
TraesCS7A02G099400	structural constituent of ribosome	molecular_function	GO:0003735	Ribosomal_S12_bac
TraesCS7A02G099400	structural constituent of ribosome	molecular_function	GO:0003735	Ribosomal_S12/S23
TraesCS7A02G099400	structural constituent of ribosome	molecular_function	GO:0003735	NA-bd_OB-fold
TraesCS7B02G429200	nucleic acid binding	molecular_function	GO:0003676	Ribosomal_S13
TraesCS7B02G429200	nucleic acid binding	molecular_function	GO:0003676	Ribosomal_S13-like_H2TH
TraesCS7B02G429200	nucleic acid binding	molecular_function	GO:0003676	30s_Rbsml_prot_S13_C
TraesCS7B02G429200	RNA binding	molecular_function	GO:0003723	Ribosomal_S13
TraesCS7B02G429200	RNA binding	molecular_function	GO:0003723	Ribosomal_S13-like_H2TH
TraesCS7B02G429200	RNA binding	molecular_function	GO:0003723	30s_Rbsml_prot_S13_C
TraesCS7B02G429200	structural constituent of ribosome	molecular_function	GO:0003735	Ribosomal_S13
TraesCS7B02G429200	structural constituent of ribosome	molecular_function	GO:0003735	Ribosomal_S13-like_H2TH
TraesCS7B02G429200	structural constituent of ribosome	molecular_function	GO:0003735	30s_Rbsml_prot_S13_C
TraesCSU02G000100	transferase activity, transferring acyl groups other than amino-acyl groups	molecular_function	GO:0016747	Chalcone/stilbene_synthase_N
TraesCSU02G000100	transferase activity, transferring acyl groups other than amino-acyl groups	molecular_function	GO:0016747	Polyketide_synthase_type-III
TraesCSU02G000100	transferase activity, transferring acyl groups other than amino-acyl groups	molecular_function	GO:0016747	Chalcone/stilbene_synth_C
TraesCSU02G000100	transferase activity, transferring acyl groups other than amino-acyl groups	molecular_function	GO:0016747	Thiolase-like
TraesCSU02G000100	catalytic activity	molecular_function	GO:0003824	Chalcone/stilbene_synthase_N
TraesCSU02G000100	catalytic activity	molecular_function	GO:0003824	Polyketide_synthase_type-III
TraesCSU02G000100	catalytic activity	molecular_function	GO:0003824	Chalcone/stilbene_synth_C
TraesCSU02G000100	catalytic activity	molecular_function	GO:0003824	Thiolase-like
TraesCSU02G177800	RNA binding	molecular_function	GO:0003723	S4_RNA-bd
TraesCSU02G177800	RNA binding	molecular_function	GO:0003723	Ribosomal_S4/S9
TraesCSU02G177800	RNA binding	molecular_function	GO:0003723	S4_RNA-bd_sf
TraesCSU02G270500	NADH dehydrogenase (ubiquinone) activity	molecular_function	GO:0008137	NADH_UbQ_OxRdtase_30kDa_su
TraesCSU02G270500	NADH dehydrogenase (ubiquinone) activity	molecular_function	GO:0008137	NADH_quin_OxRdtase_su_C/D-like
TraesCS1A02G000100
TraesCS1A02G001100
TraesCS1A02G024000
TraesCS2A02G240500
TraesCS2B02G331700				Uncharacterised_Ycf68
TraesCS3A02G405700
TraesCS3B02G011100
TraesCS3B02G121800
TraesCS5A02G555500
TraesCS5B02G116100				AA_transpt_TM
TraesCS5D02G372100
TraesCS5D02G457100
TraesCS6A02G397200
TraesCS6B02G117900
TraesCS6B02G131800
TraesCS6B02G250700
TraesCS7B02G212900				ELMO_dom
TraesCS7B02G338000
TraesCS7B02G488200
TraesCSU02G075700
TraesCSU02G151400
TraesCSU02G260700
TraesCSU02G263900
TraesCSU02G265700
TraesCSU02G266300
TraesCSU02G266700
TraesCSU02G267800
TraesCSU02G269800
TraesCSU02G269900
TraesCSU02G271200
