# Supplementary material for: Pathogen-induced alterations in methylome during Lr48-mediated APR in wheat (Triticum aestivum L.)&nbsp;
Source: Research Square preprint supplement (doi:10.21203/rs.3.rs-336817/v1), 2021-03-23
Supplement: Supplementary file 2 [file 34ff7943edbd1eba17780a91.xls]

## Sheet: Sheet1
Supplementary Table S16. List of hypermethylated genes in R0 when compared to S0 in S0 vs R0 and their gene ontology analysis
Gene stable ID	GO term name	GO domain	GO term accession	Interpro Short Description
TraesCS1A02G032800	cellular amino acid metabolic process	biological_process	GO:0006520	PyrdxlP-dep_de-COase
TraesCS1A02G032800	cellular amino acid metabolic process	biological_process	GO:0006520	Aromatic_deC
TraesCS1A02G032800	cellular amino acid metabolic process	biological_process	GO:0006520	PyrdxlP-dep_Trfase_major
TraesCS1A02G032800	cellular amino acid metabolic process	biological_process	GO:0006520	PyrdxlP-dep_Trfase_dom1
TraesCS1A02G032800	cellular amino acid metabolic process	biological_process	GO:0006520	PyrdxlP-dep_Trfase
TraesCS1A02G032800	carboxylic acid metabolic process	biological_process	GO:0019752	PyrdxlP-dep_de-COase
TraesCS1A02G032800	carboxylic acid metabolic process	biological_process	GO:0019752	Aromatic_deC
TraesCS1A02G032800	carboxylic acid metabolic process	biological_process	GO:0019752	PyrdxlP-dep_Trfase_major
TraesCS1A02G032800	carboxylic acid metabolic process	biological_process	GO:0019752	PyrdxlP-dep_Trfase_dom1
TraesCS1A02G032800	carboxylic acid metabolic process	biological_process	GO:0019752	PyrdxlP-dep_Trfase
TraesCS1A02G032900	transmembrane transport	biological_process	GO:0055085	MATE_fam
TraesCS1A02G057000	tRNA processing	biological_process	GO:0008033	IPT
TraesCS1A02G057000	tRNA processing	biological_process	GO:0008033	P-loop_NTPase
TraesCS1A02G057000	tRNA processing	biological_process	GO:0008033	Dimethylallyltransferase
TraesCS1A02G138500	cellular metabolic process	biological_process	GO:0044237	IF-2B-related
TraesCS1A02G138500	cellular metabolic process	biological_process	GO:0044237	NagB/RpiA_transferase-like
TraesCS1A02G138500	cellular metabolic process	biological_process	GO:0044237	IF_2B-like_C
TraesCS1B02G022300	protein phosphorylation	biological_process	GO:0006468	Prot_kinase_dom
TraesCS1B02G022300	protein phosphorylation	biological_process	GO:0006468	Ser/Thr_kinase_AS
TraesCS1B02G022300	protein phosphorylation	biological_process	GO:0006468	Kinase-like_dom_sf
TraesCS1B02G022300	protein phosphorylation	biological_process	GO:0006468	Protein_kinase_ATP_BS
TraesCS1B02G115600	defense response	biological_process	GO:0006952	Bet_v_I/MLP
TraesCS1B02G115600	defense response	biological_process	GO:0006952	START-like_dom_sf
TraesCS1B02G115600	defense response	biological_process	GO:0006952	Bet_v_I_allergen
TraesCS1B02G115600	abscisic acid-activated signaling pathway	biological_process	GO:0009738	Bet_v_I/MLP
TraesCS1B02G115600	abscisic acid-activated signaling pathway	biological_process	GO:0009738	START-like_dom_sf
TraesCS1B02G115600	abscisic acid-activated signaling pathway	biological_process	GO:0009738	Bet_v_I_allergen
TraesCS1B02G469800	oxidation-reduction process	biological_process	GO:0055114	Oxid_FAD_bind_N
TraesCS1B02G469800	oxidation-reduction process	biological_process	GO:0055114	BBE
TraesCS1B02G469800	oxidation-reduction process	biological_process	GO:0055114	FAD-bd_PCMH
TraesCS1B02G469800	oxidation-reduction process	biological_process	GO:0055114	FAD-bd_PCMH_sub1
TraesCS1B02G469800	oxidation-reduction process	biological_process	GO:0055114	FAD-bd_PCMH-like_sf
TraesCS1D02G017600	defense response	biological_process	GO:0006952	NB-ARC
TraesCS1D02G017600	defense response	biological_process	GO:0006952	P-loop_NTPase
TraesCS1D02G017600	defense response	biological_process	GO:0006952	LRR_dom_sf
TraesCS1D02G017600	defense response	biological_process	GO:0006952	RX-like_CC
TraesCS1D02G017600	defense response	biological_process	GO:0006952	Rx_N
TraesCS2A02G073800	mRNA processing	biological_process	GO:0006397	Znf_CCHC
TraesCS2A02G073800	mRNA processing	biological_process	GO:0006397	Put_53exo
TraesCS2A02G073800	mRNA processing	biological_process	GO:0006397	Xrn2/3/4
TraesCS2A02G073800	mRNA processing	biological_process	GO:0006397	5_3_exoribonuclease
TraesCS2A02G073800	mRNA processing	biological_process	GO:0006397	Znf_CCHC_sf
TraesCS2A02G073800	mRNA processing	biological_process	GO:0006397	Xrn1_helical
TraesCS2A02G073800	nucleobase-containing compound metabolic process	biological_process	GO:0006139	Znf_CCHC
TraesCS2A02G073800	nucleobase-containing compound metabolic process	biological_process	GO:0006139	Put_53exo
TraesCS2A02G073800	nucleobase-containing compound metabolic process	biological_process	GO:0006139	Xrn2/3/4
TraesCS2A02G073800	nucleobase-containing compound metabolic process	biological_process	GO:0006139	5_3_exoribonuclease
TraesCS2A02G073800	nucleobase-containing compound metabolic process	biological_process	GO:0006139	Znf_CCHC_sf
TraesCS2A02G073800	nucleobase-containing compound metabolic process	biological_process	GO:0006139	Xrn1_helical
TraesCS2B02G024000	protein phosphorylation	biological_process	GO:0006468	Prot_kinase_dom
TraesCS2B02G024000	protein phosphorylation	biological_process	GO:0006468	Ser/Thr_kinase_AS
TraesCS2B02G024000	protein phosphorylation	biological_process	GO:0006468	Kinase-like_dom_sf
TraesCS2B02G024100	protein phosphorylation	biological_process	GO:0006468	Prot_kinase_dom
TraesCS2B02G024100	protein phosphorylation	biological_process	GO:0006468	Legume_lectin_dom
TraesCS2B02G024100	protein phosphorylation	biological_process	GO:0006468	Ser-Thr/Tyr_kinase_cat_dom
TraesCS2B02G024100	protein phosphorylation	biological_process	GO:0006468	Ser/Thr_kinase_AS
TraesCS2B02G024100	protein phosphorylation	biological_process	GO:0006468	Kinase-like_dom_sf
TraesCS2B02G024100	protein phosphorylation	biological_process	GO:0006468	ConA-like_dom_sf
TraesCS2B02G024100	protein phosphorylation	biological_process	GO:0006468	Lectin_legB_Mn/Ca_BS
TraesCS2B02G082100	protein phosphorylation	biological_process	GO:0006468	Prot_kinase_dom
TraesCS2B02G082100	protein phosphorylation	biological_process	GO:0006468	Leu-rich_rpt
TraesCS2B02G082100	protein phosphorylation	biological_process	GO:0006468	Ser/Thr_kinase_AS
TraesCS2B02G082100	protein phosphorylation	biological_process	GO:0006468	Kinase-like_dom_sf
TraesCS2B02G082100	protein phosphorylation	biological_process	GO:0006468	LRR_N_plant-typ
TraesCS2B02G082100	protein phosphorylation	biological_process	GO:0006468	LRR_dom_sf
TraesCS2B02G173500	response to oxidative stress	biological_process	GO:0006979	Peroxidase_pln
TraesCS2B02G173500	response to oxidative stress	biological_process	GO:0006979	Haem_peroxidase
TraesCS2B02G173500	response to oxidative stress	biological_process	GO:0006979	Haem_peroxidase_sf
TraesCS2B02G173500	response to oxidative stress	biological_process	GO:0006979	Peroxidases_heam-ligand_BS
TraesCS2B02G173500	response to oxidative stress	biological_process	GO:0006979	Peroxidases_AS
TraesCS2B02G173500	response to oxidative stress	biological_process	GO:0006979	Secretory_peroxidase
TraesCS2B02G173500	hydrogen peroxide catabolic process	biological_process	GO:0042744	Peroxidase_pln
TraesCS2B02G173500	hydrogen peroxide catabolic process	biological_process	GO:0042744	Haem_peroxidase
TraesCS2B02G173500	hydrogen peroxide catabolic process	biological_process	GO:0042744	Haem_peroxidase_sf
TraesCS2B02G173500	hydrogen peroxide catabolic process	biological_process	GO:0042744	Peroxidases_heam-ligand_BS
TraesCS2B02G173500	hydrogen peroxide catabolic process	biological_process	GO:0042744	Peroxidases_AS
TraesCS2B02G173500	hydrogen peroxide catabolic process	biological_process	GO:0042744	Secretory_peroxidase
TraesCS2B02G173500	oxidation-reduction process	biological_process	GO:0055114	Peroxidase_pln
TraesCS2B02G173500	oxidation-reduction process	biological_process	GO:0055114	Haem_peroxidase
TraesCS2B02G173500	oxidation-reduction process	biological_process	GO:0055114	Haem_peroxidase_sf
TraesCS2B02G173500	oxidation-reduction process	biological_process	GO:0055114	Peroxidases_heam-ligand_BS
TraesCS2B02G173500	oxidation-reduction process	biological_process	GO:0055114	Peroxidases_AS
TraesCS2B02G173500	oxidation-reduction process	biological_process	GO:0055114	Secretory_peroxidase
TraesCS2B02G271000	oxidation-reduction process	biological_process	GO:0055114	FAD-dep_OxRdtase
TraesCS2B02G271000	oxidation-reduction process	biological_process	GO:0055114	FAD/NAD-bd_sf
TraesCS2B02G327300	carbohydrate metabolic process	biological_process	GO:0005975	Glyco_hydro_13_N
TraesCS2B02G327300	carbohydrate metabolic process	biological_process	GO:0005975	Glyco_hydro_13_cat_dom
TraesCS2B02G327300	carbohydrate metabolic process	biological_process	GO:0005975	A-amylase/branching_C
TraesCS2B02G327300	carbohydrate metabolic process	biological_process	GO:0005975	Glyco_hydro_b
TraesCS2B02G327300	carbohydrate metabolic process	biological_process	GO:0005975	Ig-like_fold
TraesCS2B02G327300	carbohydrate metabolic process	biological_process	GO:0005975	Ig_E-set
TraesCS2B02G327300	carbohydrate metabolic process	biological_process	GO:0005975	Glycoside_hydrolase_SF
TraesCS2B02G327300	carbohydrate metabolic process	biological_process	GO:0005975	Branching_enzy
TraesCS2B02G327300	glycogen biosynthetic process	biological_process	GO:0005978	Glyco_hydro_13_N
TraesCS2B02G327300	glycogen biosynthetic process	biological_process	GO:0005978	Glyco_hydro_13_cat_dom
TraesCS2B02G327300	glycogen biosynthetic process	biological_process	GO:0005978	A-amylase/branching_C
TraesCS2B02G327300	glycogen biosynthetic process	biological_process	GO:0005978	Glyco_hydro_b
TraesCS2B02G327300	glycogen biosynthetic process	biological_process	GO:0005978	Ig-like_fold
TraesCS2B02G327300	glycogen biosynthetic process	biological_process	GO:0005978	Ig_E-set
TraesCS2B02G327300	glycogen biosynthetic process	biological_process	GO:0005978	Glycoside_hydrolase_SF
TraesCS2B02G327300	glycogen biosynthetic process	biological_process	GO:0005978	Branching_enzy
TraesCS2B02G377500	nucleoside metabolic process	biological_process	GO:0009116	PRibTrfase_dom
TraesCS2B02G377500	nucleoside metabolic process	biological_process	GO:0009116	Ade_phspho_trans
TraesCS2B02G377500	nucleoside metabolic process	biological_process	GO:0009116	PRTase-like
TraesCS2B02G377500	adenine salvage	biological_process	GO:0006168	PRibTrfase_dom
TraesCS2B02G377500	adenine salvage	biological_process	GO:0006168	Ade_phspho_trans
TraesCS2B02G377500	adenine salvage	biological_process	GO:0006168	PRTase-like
TraesCS2B02G571500	protein transport	biological_process	GO:0015031	Exo70
TraesCS2B02G571500	protein transport	biological_process	GO:0015031	Cullin_repeat-like_dom_sf
TraesCS2B02G571500	exocytosis	biological_process	GO:0006887	Exo70
TraesCS2B02G571500	exocytosis	biological_process	GO:0006887	Cullin_repeat-like_dom_sf
TraesCS2B02G573300	oxidation-reduction process	biological_process	GO:0055114	Cyt_P450
TraesCS2B02G573300	oxidation-reduction process	biological_process	GO:0055114	Cyt_P450_E_grp-I
TraesCS2B02G573300	oxidation-reduction process	biological_process	GO:0055114	Cyt_P450_CS
TraesCS2B02G573300	oxidation-reduction process	biological_process	GO:0055114	Cyt_P450_sf
TraesCS2B02G595000	carbohydrate metabolic process	biological_process	GO:0005975	Glyco_hydro_32
TraesCS2B02G595000	carbohydrate metabolic process	biological_process	GO:0005975	Glyco_hydro_32_N
TraesCS2B02G595000	carbohydrate metabolic process	biological_process	GO:0005975	Glyco_hydro_32_C
TraesCS2B02G595000	carbohydrate metabolic process	biological_process	GO:0005975	ConA-like_dom_sf
TraesCS2B02G595000	carbohydrate metabolic process	biological_process	GO:0005975	Glyco_hydro_beta-prop_sf
TraesCS2D02G016100	biosynthetic process	biological_process	GO:0009058	Chalcone/stilbene_synthase_N
TraesCS2D02G016100	biosynthetic process	biological_process	GO:0009058	Polyketide_synthase_type-III
TraesCS2D02G016100	biosynthetic process	biological_process	GO:0009058	Chalcone/stilbene_synth_C
TraesCS2D02G016100	biosynthetic process	biological_process	GO:0009058	Thiolase-like
TraesCS2D02G045700	transmembrane transport	biological_process	GO:0055085	MFS_sugar_transport-like
TraesCS2D02G045700	transmembrane transport	biological_process	GO:0055085	MFS_dom
TraesCS2D02G045700	transmembrane transport	biological_process	GO:0055085	MFS_trans_sf
TraesCS2D02G277300	protein ubiquitination	biological_process	GO:0016567	Ubox_domain
TraesCS2D02G277300	protein ubiquitination	biological_process	GO:0016567	ARM-like
TraesCS2D02G277300	protein ubiquitination	biological_process	GO:0016567	Znf_RING/FYVE/PHD
TraesCS2D02G277300	protein ubiquitination	biological_process	GO:0016567	ARM-type_fold
TraesCS2D02G419700	protein phosphorylation	biological_process	GO:0006468	Prot_kinase_dom
TraesCS2D02G419700	protein phosphorylation	biological_process	GO:0006468	Thaumatin
TraesCS2D02G419700	protein phosphorylation	biological_process	GO:0006468	Ser/Thr_kinase_AS
TraesCS2D02G419700	protein phosphorylation	biological_process	GO:0006468	Kinase-like_dom_sf
TraesCS2D02G419700	protein phosphorylation	biological_process	GO:0006468	Protein_kinase_ATP_BS
TraesCS2D02G419700	protein phosphorylation	biological_process	GO:0006468	Thaumatin_CS
TraesCS2D02G419700	protein phosphorylation	biological_process	GO:0006468	Osmotin/thaumatin-like_sf
TraesCS3A02G005500	defense response	biological_process	GO:0006952	Mlo
TraesCS3A02G005500	response to biotic stimulus	biological_process	GO:0009607	Mlo
TraesCS3A02G017100	protein phosphorylation	biological_process	GO:0006468	Prot_kinase_dom
TraesCS3A02G017100	protein phosphorylation	biological_process	GO:0006468	Ser/Thr_kinase_AS
TraesCS3A02G017100	protein phosphorylation	biological_process	GO:0006468	Kinase-like_dom_sf
TraesCS3A02G017100	protein phosphorylation	biological_process	GO:0006468	Protein_kinase_ATP_BS
TraesCS3A02G017100	protein phosphorylation	biological_process	GO:0006468	WAK_GUB
TraesCS3A02G133300	tRNA threonylcarbamoyladenosine modification	biological_process	GO:0002949	Gcp-like_dom
TraesCS3A02G133300	tRNA threonylcarbamoyladenosine modification	biological_process	GO:0002949	KAE1/TsaD
TraesCS3A02G133300	tRNA threonylcarbamoyladenosine modification	biological_process	GO:0002949	TsaD
TraesCS3A02G227100	protein phosphorylation	biological_process	GO:0006468	Prot_kinase_dom
TraesCS3A02G227100	protein phosphorylation	biological_process	GO:0006468	Ser/Thr_kinase_AS
TraesCS3A02G227100	protein phosphorylation	biological_process	GO:0006468	Kinase-like_dom_sf
TraesCS3A02G227100	protein phosphorylation	biological_process	GO:0006468	Protein_kinase_ATP_BS
TraesCS3A02G298200	biosynthetic process	biological_process	GO:0009058	6-blade_b-propeller_TolB-like
TraesCS3A02G298200	biosynthetic process	biological_process	GO:0009058	Strictosidine_synth_cons-reg
TraesCS3A02G494700	oxidation-reduction process	biological_process	GO:0055114	Oxid_FAD_bind_N
TraesCS3A02G494700	oxidation-reduction process	biological_process	GO:0055114	ALO
TraesCS3A02G494700	oxidation-reduction process	biological_process	GO:0055114	GULO_Plant
TraesCS3A02G494700	oxidation-reduction process	biological_process	GO:0055114	FAD-bd_PCMH
TraesCS3A02G494700	oxidation-reduction process	biological_process	GO:0055114	FAD-bd_PCMH_sub2
TraesCS3A02G494700	oxidation-reduction process	biological_process	GO:0055114	FAD-bd_PCMH-like_sf
TraesCS3A02G499200	transmembrane transport	biological_process	GO:0055085	MATE_fam
TraesCS3A02G509100	response to oxidative stress	biological_process	GO:0006979	Peroxidase_pln
TraesCS3A02G509100	response to oxidative stress	biological_process	GO:0006979	Haem_peroxidase
TraesCS3A02G509100	response to oxidative stress	biological_process	GO:0006979	Haem_peroxidase_sf
TraesCS3A02G509100	response to oxidative stress	biological_process	GO:0006979	Peroxidases_AS
TraesCS3A02G509100	response to oxidative stress	biological_process	GO:0006979	Secretory_peroxidase
TraesCS3A02G509100	hydrogen peroxide catabolic process	biological_process	GO:0042744	Peroxidase_pln
TraesCS3A02G509100	hydrogen peroxide catabolic process	biological_process	GO:0042744	Haem_peroxidase
TraesCS3A02G509100	hydrogen peroxide catabolic process	biological_process	GO:0042744	Haem_peroxidase_sf
TraesCS3A02G509100	hydrogen peroxide catabolic process	biological_process	GO:0042744	Peroxidases_AS
TraesCS3A02G509100	hydrogen peroxide catabolic process	biological_process	GO:0042744	Secretory_peroxidase
TraesCS3A02G509100	oxidation-reduction process	biological_process	GO:0055114	Peroxidase_pln
TraesCS3A02G509100	oxidation-reduction process	biological_process	GO:0055114	Haem_peroxidase
TraesCS3A02G509100	oxidation-reduction process	biological_process	GO:0055114	Haem_peroxidase_sf
TraesCS3A02G509100	oxidation-reduction process	biological_process	GO:0055114	Peroxidases_AS
TraesCS3A02G509100	oxidation-reduction process	biological_process	GO:0055114	Secretory_peroxidase
TraesCS3B02G140600	proteolysis	biological_process	GO:0006508	Aspartic_peptidase_A1
TraesCS3B02G140600	proteolysis	biological_process	GO:0006508	Aspartic_peptidase_AS
TraesCS3B02G140600	proteolysis	biological_process	GO:0006508	Peptidase_aspartic_dom_sf
TraesCS3B02G140600	proteolysis	biological_process	GO:0006508	TAXi_C
TraesCS3B02G140600	proteolysis	biological_process	GO:0006508	TAXi_N
TraesCS3B02G140600	proteolysis	biological_process	GO:0006508	PEPTIDASE_A1
TraesCS3B02G140600	proteolysis	biological_process	GO:0006508	Pepsin-like_plant
TraesCS3B02G158800	transcription, DNA-templated	biological_process	GO:0006351	AP2/ERF_dom
TraesCS3B02G158800	transcription, DNA-templated	biological_process	GO:0006351	DNA-bd_dom_sf
TraesCS3B02G158800	transcription, DNA-templated	biological_process	GO:0006351	AP2/ERF_dom_sf
TraesCS3B02G158800	regulation of transcription, DNA-templated	biological_process	GO:0006355	AP2/ERF_dom
TraesCS3B02G158800	regulation of transcription, DNA-templated	biological_process	GO:0006355	DNA-bd_dom_sf
TraesCS3B02G158800	regulation of transcription, DNA-templated	biological_process	GO:0006355	AP2/ERF_dom_sf
TraesCS3B02G269700	proteolysis	biological_process	GO:0006508	Peptidase_S41A
TraesCS3B02G269700	proteolysis	biological_process	GO:0006508	Tail-specific_protease
TraesCS3B02G269700	proteolysis	biological_process	GO:0006508	ClpP/crotonase-like_dom_sf
TraesCS3B02G269700	proteolysis	biological_process	GO:0006508	PDZ
TraesCS3B02G269700	proteolysis	biological_process	GO:0006508	PDZ_sf
TraesCS3B02G269700	proteolysis	biological_process	GO:0006508	PDZ_6
TraesCS3B02G474500	protein phosphorylation	biological_process	GO:0006468	Prot_kinase_dom
TraesCS3B02G474500	protein phosphorylation	biological_process	GO:0006468	EGF-like_dom
TraesCS3B02G474500	protein phosphorylation	biological_process	GO:0006468	EGF-like_Ca-bd_dom
TraesCS3B02G474500	protein phosphorylation	biological_process	GO:0006468	Ser/Thr_kinase_AS
TraesCS3B02G474500	protein phosphorylation	biological_process	GO:0006468	Growth_fac_rcpt_cys_sf
TraesCS3B02G474500	protein phosphorylation	biological_process	GO:0006468	Kinase-like_dom_sf
TraesCS3B02G474500	protein phosphorylation	biological_process	GO:0006468	Protein_kinase_ATP_BS
TraesCS3B02G474500	protein phosphorylation	biological_process	GO:0006468	EGF_Ca-bd_CS
TraesCS3B02G474500	protein phosphorylation	biological_process	GO:0006468	WAK_GUB
TraesCS3B02G531000	proteolysis	biological_process	GO:0006508	Peptidase_C48_C
TraesCS3B02G531000	proteolysis	biological_process	GO:0006508	Papain-like_cys_pep_sf
TraesCS3B02G573300	defense response	biological_process	GO:0006952	NB-ARC
TraesCS3B02G573300	defense response	biological_process	GO:0006952	P-loop_NTPase
TraesCS3B02G573300	defense response	biological_process	GO:0006952	RX-like_CC
TraesCS3B02G573300	defense response	biological_process	GO:0006952	Rx_N
TraesCS3D02G004800	negative regulation of catalytic activity	biological_process	GO:0043086	Pectinesterase_inhib_dom
TraesCS3D02G004800	negative regulation of catalytic activity	biological_process	GO:0043086	PMEI_plant
TraesCS3D02G004800	negative regulation of catalytic activity	biological_process	GO:0043086	Invertase/methylesterase_inhib
TraesCS3D02G330800	carbohydrate metabolic process	biological_process	GO:0005975	Glyco_hydro_1
TraesCS3D02G330800	carbohydrate metabolic process	biological_process	GO:0005975	Glycoside_hydrolase_SF
TraesCS3D02G330800	carbohydrate metabolic process	biological_process	GO:0005975	Glyco_hydro_1_N_CS
TraesCS4A02G036200	jasmonic acid biosynthetic process	biological_process	GO:0009695	AMP-dep_Synth/Lig
TraesCS4A02G036200	jasmonic acid biosynthetic process	biological_process	GO:0009695	AMP-binding_CS
TraesCS4A02G036200	jasmonic acid biosynthetic process	biological_process	GO:0009695	AMP-bd_C
TraesCS4A02G036200	jasmonic acid biosynthetic process	biological_process	GO:0009695	AMP-dep_Synthh-like_sf
TraesCS4A02G179600	proteolysis	biological_process	GO:0006508	Peptidase_S54_rhomboid
TraesCS4A02G179600	proteolysis	biological_process	GO:0006508	Peptidase_S54_rhomboid_dom
TraesCS4A02G179600	proteolysis	biological_process	GO:0006508	Rhomboid-like_sf
TraesCS4A02G448100	protein phosphorylation	biological_process	GO:0006468	EGF-type_Asp/Asn_hydroxyl_site
TraesCS4A02G448100	protein phosphorylation	biological_process	GO:0006468	Prot_kinase_dom
TraesCS4A02G448100	protein phosphorylation	biological_process	GO:0006468	EGF-like_dom
TraesCS4A02G448100	protein phosphorylation	biological_process	GO:0006468	Ser-Thr/Tyr_kinase_cat_dom
TraesCS4A02G448100	protein phosphorylation	biological_process	GO:0006468	EGF-like_Ca-bd_dom
TraesCS4A02G448100	protein phosphorylation	biological_process	GO:0006468	Ser/Thr_kinase_AS
TraesCS4A02G448100	protein phosphorylation	biological_process	GO:0006468	Growth_fac_rcpt_cys_sf
TraesCS4A02G448100	protein phosphorylation	biological_process	GO:0006468	Kinase-like_dom_sf
TraesCS4A02G448100	protein phosphorylation	biological_process	GO:0006468	Protein_kinase_ATP_BS
TraesCS4A02G448100	protein phosphorylation	biological_process	GO:0006468	EGF_Ca-bd_CS
TraesCS4A02G448100	protein phosphorylation	biological_process	GO:0006468	WAK_GUB
TraesCS4A02G491100	cell redox homeostasis	biological_process	GO:0045454	Glutaredoxin
TraesCS4A02G491100	cell redox homeostasis	biological_process	GO:0045454	Kelch_1
TraesCS4A02G491100	cell redox homeostasis	biological_process	GO:0045454	Kelch-typ_b-propeller
TraesCS4A02G491100	cell redox homeostasis	biological_process	GO:0045454	Thioredoxin-like_sf
TraesCS4B02G070800	protein ubiquitination	biological_process	GO:0016567	Znf_RING
TraesCS4B02G070800	protein ubiquitination	biological_process	GO:0016567	IBR_dom
TraesCS4B02G070800	protein ubiquitination	biological_process	GO:0016567	Znf_RING/FYVE/PHD
TraesCS4B02G070800	protein ubiquitination	biological_process	GO:0016567	Ariadne-2
TraesCS4B02G070800	protein ubiquitination	biological_process	GO:0016567	E3_UB_ligase_RBR
TraesCS4B02G179700	iron-sulfur cluster assembly	biological_process	GO:0016226	NIF_FeS_clus_asmbl_NifU_C
TraesCS4B02G179700	iron-sulfur cluster assembly	biological_process	GO:0016226	FSCA_dom_sf
TraesCS4B02G370500	oxidation-reduction process	biological_process	GO:0055114	Flavin_mOase
TraesCS4B02G370500	oxidation-reduction process	biological_process	GO:0055114	Flavin_mOase-like
TraesCS4B02G370500	oxidation-reduction process	biological_process	GO:0055114	FAD/NAD-bd_sf
TraesCS4B02G390200	proteolysis	biological_process	GO:0006508	Pept_cys_AS
TraesCS4B02G390200	proteolysis	biological_process	GO:0006508	Peptidase_C1A_C
TraesCS4B02G390200	proteolysis	biological_process	GO:0006508	Prot_inhib_I29
TraesCS4B02G390200	proteolysis	biological_process	GO:0006508	Pept_asp_AS
TraesCS4B02G390200	proteolysis	biological_process	GO:0006508	Papain-like_cys_pep_sf
TraesCS4B02G390200	proteolysis	biological_process	GO:0006508	Peptidase_C1A_papain-like
TraesCS4D02G359700	cellular amino acid metabolic process	biological_process	GO:0006520	PyrdxlP-dep_de-COase
TraesCS4D02G359700	cellular amino acid metabolic process	biological_process	GO:0006520	Aromatic_deC
TraesCS4D02G359700	cellular amino acid metabolic process	biological_process	GO:0006520	PyrdxlP-dep_Trfase_major
TraesCS4D02G359700	cellular amino acid metabolic process	biological_process	GO:0006520	PyrdxlP-dep_Trfase_dom1
TraesCS4D02G359700	cellular amino acid metabolic process	biological_process	GO:0006520	PyrdxlP-dep_Trfase
TraesCS4D02G359700	cellular amino acid metabolic process	biological_process	GO:0006520	Pyridoxal-P_BS
TraesCS4D02G359700	carboxylic acid metabolic process	biological_process	GO:0019752	PyrdxlP-dep_de-COase
TraesCS4D02G359700	carboxylic acid metabolic process	biological_process	GO:0019752	Aromatic_deC
TraesCS4D02G359700	carboxylic acid metabolic process	biological_process	GO:0019752	PyrdxlP-dep_Trfase_major
TraesCS4D02G359700	carboxylic acid metabolic process	biological_process	GO:0019752	PyrdxlP-dep_Trfase_dom1
TraesCS4D02G359700	carboxylic acid metabolic process	biological_process	GO:0019752	PyrdxlP-dep_Trfase
TraesCS4D02G359700	carboxylic acid metabolic process	biological_process	GO:0019752	Pyridoxal-P_BS
TraesCS5A02G318100	oxidation-reduction process	biological_process	GO:0055114	Cyt_P450
TraesCS5A02G318100	oxidation-reduction process	biological_process	GO:0055114	Cyt_P450_E_grp-I
TraesCS5A02G318100	oxidation-reduction process	biological_process	GO:0055114	Cyt_P450_CS
TraesCS5A02G318100	oxidation-reduction process	biological_process	GO:0055114	Cyt_P450_sf
TraesCS5A02G527600	oxidation-reduction process	biological_process	GO:0055114	Cyt_b245_heavy_chain
TraesCS5A02G527600	oxidation-reduction process	biological_process	GO:0055114	EF_hand_dom
TraesCS5A02G527600	oxidation-reduction process	biological_process	GO:0055114	EF-hand-dom_pair
TraesCS5A02G527600	oxidation-reduction process	biological_process	GO:0055114	FAD-bd_8
TraesCS5A02G527600	oxidation-reduction process	biological_process	GO:0055114	Fe_red_NAD-bd_6
TraesCS5A02G527600	oxidation-reduction process	biological_process	GO:0055114	Fe3_Rdtase_TM_dom
TraesCS5A02G527600	oxidation-reduction process	biological_process	GO:0055114	NADPH_Ox
TraesCS5A02G527600	oxidation-reduction process	biological_process	GO:0055114	FAD-bd_FR_type
TraesCS5A02G527600	oxidation-reduction process	biological_process	GO:0055114	Riboflavin_synthase-like_b-brl
TraesCS5A02G527600	oxidation-reduction process	biological_process	GO:0055114	EF_Hand_1_Ca_BS
TraesCS5A02G527600	oxidation-reduction process	biological_process	GO:0055114	RBOHB
TraesCS5A02G527600	oxidation-reduction process	biological_process	GO:0055114	FNR_nucleotide-bd
TraesCS5B02G124400	protein phosphorylation	biological_process	GO:0006468	Prot_kinase_dom
TraesCS5B02G124400	protein phosphorylation	biological_process	GO:0006468	Ser-Thr/Tyr_kinase_cat_dom
TraesCS5B02G124400	protein phosphorylation	biological_process	GO:0006468	ACT_dom
TraesCS5B02G124400	protein phosphorylation	biological_process	GO:0006468	Ser/Thr_kinase_AS
TraesCS5B02G124400	protein phosphorylation	biological_process	GO:0006468	Kinase-like_dom_sf
TraesCS6A02G009100	carbohydrate transport	biological_process	GO:0008643	SWEET_sugar_transpr
TraesCS6A02G032700	sexual reproduction	biological_process	GO:0019953	LolPI
TraesCS6A02G032700	sexual reproduction	biological_process	GO:0019953	Expansin/allergen_DPBB_dom
TraesCS6A02G032700	sexual reproduction	biological_process	GO:0019953	Expansin_CBD
TraesCS6A02G032700	sexual reproduction	biological_process	GO:0019953	Expan_Lol_pI
TraesCS6A02G032700	sexual reproduction	biological_process	GO:0019953	RlpA-like_DPBB
TraesCS6A02G032700	sexual reproduction	biological_process	GO:0019953	Expansin_CBD_sf
TraesCS6A02G032700	sexual reproduction	biological_process	GO:0019953	RlpA-like_sf
TraesCS6A02G042600	protein folding in endoplasmic reticulum	biological_process	GO:0034975	Hsp_70_fam
TraesCS6A02G042600	protein folding in endoplasmic reticulum	biological_process	GO:0034975	Heat_shock_70_CS
TraesCS6A02G042600	protein folding in endoplasmic reticulum	biological_process	GO:0034975	HSP70_peptide-bd_sf
TraesCS6A02G042600	protein folding in endoplasmic reticulum	biological_process	GO:0034975	HSP70_C_sf
TraesCS6A02G042600	protein folding in endoplasmic reticulum	biological_process	GO:0034975	BIP_NBD
TraesCS6A02G058500	protein phosphorylation	biological_process	GO:0006468	Prot_kinase_dom
TraesCS6A02G058500	protein phosphorylation	biological_process	GO:0006468	Legume_lectin_dom
TraesCS6A02G058500	protein phosphorylation	biological_process	GO:0006468	Ser/Thr_kinase_AS
TraesCS6A02G058500	protein phosphorylation	biological_process	GO:0006468	Kinase-like_dom_sf
TraesCS6A02G058500	protein phosphorylation	biological_process	GO:0006468	ConA-like_dom_sf
TraesCS6A02G058500	protein phosphorylation	biological_process	GO:0006468	Protein_kinase_ATP_BS
TraesCS6A02G058500	protein phosphorylation	biological_process	GO:0006468	Lectin_legB_Mn/Ca_BS
TraesCS6A02G058500	protein phosphorylation	biological_process	GO:0006468	SRK-like_kinase
TraesCS6B02G417400	microtubule-based movement	biological_process	GO:0007018	Kinesin_motor_dom
TraesCS6B02G417400	microtubule-based movement	biological_process	GO:0007018	P-loop_NTPase
TraesCS6B02G417400	microtubule-based movement	biological_process	GO:0007018	Kinesin-like_fam
TraesCS6B02G417400	microtubule-based movement	biological_process	GO:0007018	Kinesin_motor_dom_sf
TraesCS6D02G037700	sexual reproduction	biological_process	GO:0019953	LolPI
TraesCS6D02G037700	sexual reproduction	biological_process	GO:0019953	Expansin/allergen_DPBB_dom
TraesCS6D02G037700	sexual reproduction	biological_process	GO:0019953	Expansin_CBD
TraesCS6D02G037700	sexual reproduction	biological_process	GO:0019953	Expan_Lol_pI
TraesCS6D02G037700	sexual reproduction	biological_process	GO:0019953	RlpA-like_DPBB
TraesCS6D02G037700	sexual reproduction	biological_process	GO:0019953	Expansin_CBD_sf
TraesCS6D02G037700	sexual reproduction	biological_process	GO:0019953	RlpA-like_sf
TraesCS6D02G057800	oxidation-reduction process	biological_process	GO:0055114	Cyt_P450
TraesCS6D02G057800	oxidation-reduction process	biological_process	GO:0055114	Cyt_P450_E_grp-I
TraesCS6D02G057800	oxidation-reduction process	biological_process	GO:0055114	Cyt_P450_CS
TraesCS6D02G057800	oxidation-reduction process	biological_process	GO:0055114	Cyt_P450_sf
TraesCS6D02G375700	recognition of pollen	biological_process	GO:0048544	Prot_kinase_dom
TraesCS6D02G375700	recognition of pollen	biological_process	GO:0048544	S_locus_glycoprot_dom
TraesCS6D02G375700	recognition of pollen	biological_process	GO:0048544	Ser-Thr/Tyr_kinase_cat_dom
TraesCS6D02G375700	recognition of pollen	biological_process	GO:0048544	Bulb-type_lectin_dom
TraesCS6D02G375700	recognition of pollen	biological_process	GO:0048544	Pan_app
TraesCS6D02G375700	recognition of pollen	biological_process	GO:0048544	Ser/Thr_kinase_AS
TraesCS6D02G375700	recognition of pollen	biological_process	GO:0048544	Kinase-like_dom_sf
TraesCS6D02G375700	recognition of pollen	biological_process	GO:0048544	Protein_kinase_ATP_BS
TraesCS6D02G375700	recognition of pollen	biological_process	GO:0048544	SRK-like_kinase
TraesCS6D02G375700	recognition of pollen	biological_process	GO:0048544	Bulb-type_lectin_dom_sf
TraesCS6D02G375700	protein phosphorylation	biological_process	GO:0006468	Prot_kinase_dom
TraesCS6D02G375700	protein phosphorylation	biological_process	GO:0006468	S_locus_glycoprot_dom
TraesCS6D02G375700	protein phosphorylation	biological_process	GO:0006468	Ser-Thr/Tyr_kinase_cat_dom
TraesCS6D02G375700	protein phosphorylation	biological_process	GO:0006468	Bulb-type_lectin_dom
TraesCS6D02G375700	protein phosphorylation	biological_process	GO:0006468	Pan_app
TraesCS6D02G375700	protein phosphorylation	biological_process	GO:0006468	Ser/Thr_kinase_AS
TraesCS6D02G375700	protein phosphorylation	biological_process	GO:0006468	Kinase-like_dom_sf
TraesCS6D02G375700	protein phosphorylation	biological_process	GO:0006468	Protein_kinase_ATP_BS
TraesCS6D02G375700	protein phosphorylation	biological_process	GO:0006468	SRK-like_kinase
TraesCS6D02G375700	protein phosphorylation	biological_process	GO:0006468	Bulb-type_lectin_dom_sf
TraesCS7A02G059500	cellular amino acid metabolic process	biological_process	GO:0006520	PyrdxlP-dep_de-COase
TraesCS7A02G059500	cellular amino acid metabolic process	biological_process	GO:0006520	Aromatic_deC
TraesCS7A02G059500	cellular amino acid metabolic process	biological_process	GO:0006520	PyrdxlP-dep_Trfase_major
TraesCS7A02G059500	cellular amino acid metabolic process	biological_process	GO:0006520	PyrdxlP-dep_Trfase_dom1
TraesCS7A02G059500	cellular amino acid metabolic process	biological_process	GO:0006520	PyrdxlP-dep_Trfase
TraesCS7A02G059500	cellular amino acid metabolic process	biological_process	GO:0006520	Pyridoxal-P_BS
TraesCS7A02G059500	carboxylic acid metabolic process	biological_process	GO:0019752	PyrdxlP-dep_de-COase
TraesCS7A02G059500	carboxylic acid metabolic process	biological_process	GO:0019752	Aromatic_deC
TraesCS7A02G059500	carboxylic acid metabolic process	biological_process	GO:0019752	PyrdxlP-dep_Trfase_major
TraesCS7A02G059500	carboxylic acid metabolic process	biological_process	GO:0019752	PyrdxlP-dep_Trfase_dom1
TraesCS7A02G059500	carboxylic acid metabolic process	biological_process	GO:0019752	PyrdxlP-dep_Trfase
TraesCS7A02G059500	carboxylic acid metabolic process	biological_process	GO:0019752	Pyridoxal-P_BS
TraesCS7A02G085400	protein phosphorylation	biological_process	GO:0006468	Prot_kinase_dom
TraesCS7A02G085400	protein phosphorylation	biological_process	GO:0006468	Legume_lectin_dom
TraesCS7A02G085400	protein phosphorylation	biological_process	GO:0006468	Ser/Thr_kinase_AS
TraesCS7A02G085400	protein phosphorylation	biological_process	GO:0006468	Kinase-like_dom_sf
TraesCS7A02G085400	protein phosphorylation	biological_process	GO:0006468	ConA-like_dom_sf
TraesCS7A02G085400	protein phosphorylation	biological_process	GO:0006468	Protein_kinase_ATP_BS
TraesCS7D02G526700	protein phosphorylation	biological_process	GO:0006468	Prot_kinase_dom
TraesCS7D02G526700	protein phosphorylation	biological_process	GO:0006468	Ser/Thr_kinase_AS
TraesCS7D02G526700	protein phosphorylation	biological_process	GO:0006468	Kinase-like_dom_sf
TraesCS7D02G526700	protein phosphorylation	biological_process	GO:0006468	Protein_kinase_ATP_BS
TraesCS7D02G555000	cellulose biosynthetic process	biological_process	GO:0030244	Cellulose_synth
TraesCS7D02G555000	cellulose biosynthetic process	biological_process	GO:0030244	Nucleotide-diphossugar_trans
TraesCS7D02G555000	cell wall organization	biological_process	GO:0071555	Cellulose_synth
TraesCS7D02G555000	cell wall organization	biological_process	GO:0071555	Nucleotide-diphossugar_trans
TraesCSU02G015100	response to oxidative stress	biological_process	GO:0006979	Peroxidase_pln
TraesCSU02G015100	response to oxidative stress	biological_process	GO:0006979	Haem_peroxidase
TraesCSU02G015100	response to oxidative stress	biological_process	GO:0006979	Haem_peroxidase_sf
TraesCSU02G015100	response to oxidative stress	biological_process	GO:0006979	Peroxidases_heam-ligand_BS
TraesCSU02G015100	response to oxidative stress	biological_process	GO:0006979	Secretory_peroxidase
TraesCSU02G015100	hydrogen peroxide catabolic process	biological_process	GO:0042744	Peroxidase_pln
TraesCSU02G015100	hydrogen peroxide catabolic process	biological_process	GO:0042744	Haem_peroxidase
TraesCSU02G015100	hydrogen peroxide catabolic process	biological_process	GO:0042744	Haem_peroxidase_sf
TraesCSU02G015100	hydrogen peroxide catabolic process	biological_process	GO:0042744	Peroxidases_heam-ligand_BS
TraesCSU02G015100	hydrogen peroxide catabolic process	biological_process	GO:0042744	Secretory_peroxidase
TraesCSU02G015100	oxidation-reduction process	biological_process	GO:0055114	Peroxidase_pln
TraesCSU02G015100	oxidation-reduction process	biological_process	GO:0055114	Haem_peroxidase
TraesCSU02G015100	oxidation-reduction process	biological_process	GO:0055114	Haem_peroxidase_sf
TraesCSU02G015100	oxidation-reduction process	biological_process	GO:0055114	Peroxidases_heam-ligand_BS
TraesCSU02G015100	oxidation-reduction process	biological_process	GO:0055114	Secretory_peroxidase
TraesCSU02G066300	defense response	biological_process	GO:0006952	Thionin
TraesCSU02G066300	defense response	biological_process	GO:0006952	Thionin-like_sf
TraesCSU02G154600	electron transport chain	biological_process	GO:0022900	CcO_II-like_C
TraesCSU02G154600	electron transport chain	biological_process	GO:0022900	Cupredoxin
TraesCSU02G154600	electron transport chain	biological_process	GO:0022900	Cyt_c_oxidase_su2_TM_dom
TraesCSU02G154600	electron transport chain	biological_process	GO:0022900	CcO_II_C
TraesCSU02G154600	electron transport chain	biological_process	GO:0022900	Cyt_c_oxidase_su2_TM_sf
TraesCSU02G155100	oxidation-reduction process	biological_process	GO:0055114	Cyt_P450
TraesCSU02G155100	oxidation-reduction process	biological_process	GO:0055114	Cyt_P450_E_grp-I
TraesCSU02G155100	oxidation-reduction process	biological_process	GO:0055114	Cyt_P450_CS
TraesCSU02G155100	oxidation-reduction process	biological_process	GO:0055114	Cyt_P450_sf
TraesCSU02G206500	oxidation-reduction process	biological_process	GO:0055114	Cyt_P450
TraesCSU02G206500	oxidation-reduction process	biological_process	GO:0055114	Cyt_P450_E_grp-I
TraesCSU02G206500	oxidation-reduction process	biological_process	GO:0055114	Cyt_P450_CS
TraesCSU02G206500	oxidation-reduction process	biological_process	GO:0055114	Cyt_P450_sf
TraesCSU02G214800	phosphorelay signal transduction system	biological_process	GO:0000160	HPT_dom_sf
TraesCSU02G214800	phosphorelay signal transduction system	biological_process	GO:0000160	Sig_transdc_His_kin_Hpt_dom
TraesCSU02G241700	protein phosphorylation	biological_process	GO:0006468	Prot_kinase_dom
TraesCSU02G241700	protein phosphorylation	biological_process	GO:0006468	Ser-Thr/Tyr_kinase_cat_dom
TraesCSU02G241700	protein phosphorylation	biological_process	GO:0006468	Ser/Thr_kinase_AS
TraesCSU02G241700	protein phosphorylation	biological_process	GO:0006468	Kinase-like_dom_sf
TraesCSU02G243800	recognition of pollen	biological_process	GO:0048544	Prot_kinase_dom
TraesCSU02G243800	recognition of pollen	biological_process	GO:0048544	S_locus_glycoprot_dom
TraesCSU02G243800	recognition of pollen	biological_process	GO:0048544	Pan_app
TraesCSU02G243800	recognition of pollen	biological_process	GO:0048544	Ser/Thr_kinase_AS
TraesCSU02G243800	recognition of pollen	biological_process	GO:0048544	Kinase-like_dom_sf
TraesCSU02G243800	recognition of pollen	biological_process	GO:0048544	Protein_kinase_ATP_BS
TraesCSU02G243800	protein phosphorylation	biological_process	GO:0006468	Prot_kinase_dom
TraesCSU02G243800	protein phosphorylation	biological_process	GO:0006468	S_locus_glycoprot_dom
TraesCSU02G243800	protein phosphorylation	biological_process	GO:0006468	Pan_app
TraesCSU02G243800	protein phosphorylation	biological_process	GO:0006468	Ser/Thr_kinase_AS
TraesCSU02G243800	protein phosphorylation	biological_process	GO:0006468	Kinase-like_dom_sf
TraesCSU02G243800	protein phosphorylation	biological_process	GO:0006468	Protein_kinase_ATP_BS
TraesCSU02G249900	cellular amino acid metabolic process	biological_process	GO:0006520	PyrdxlP-dep_de-COase
TraesCSU02G249900	cellular amino acid metabolic process	biological_process	GO:0006520	Aromatic_deC
TraesCSU02G249900	cellular amino acid metabolic process	biological_process	GO:0006520	PyrdxlP-dep_Trfase_major
TraesCSU02G249900	cellular amino acid metabolic process	biological_process	GO:0006520	PyrdxlP-dep_Trfase_dom1
TraesCSU02G249900	cellular amino acid metabolic process	biological_process	GO:0006520	PyrdxlP-dep_Trfase
TraesCSU02G249900	cellular amino acid metabolic process	biological_process	GO:0006520	Pyridoxal-P_BS
TraesCSU02G249900	carboxylic acid metabolic process	biological_process	GO:0019752	PyrdxlP-dep_de-COase
TraesCSU02G249900	carboxylic acid metabolic process	biological_process	GO:0019752	Aromatic_deC
TraesCSU02G249900	carboxylic acid metabolic process	biological_process	GO:0019752	PyrdxlP-dep_Trfase_major
TraesCSU02G249900	carboxylic acid metabolic process	biological_process	GO:0019752	PyrdxlP-dep_Trfase_dom1
TraesCSU02G249900	carboxylic acid metabolic process	biological_process	GO:0019752	PyrdxlP-dep_Trfase
TraesCSU02G249900	carboxylic acid metabolic process	biological_process	GO:0019752	Pyridoxal-P_BS
TraesCS1A02G032900	integral component of membrane	cellular_component	GO:0016021	MATE_fam
TraesCS1A02G032900	membrane	cellular_component	GO:0016020	MATE_fam
TraesCS1A02G078700	integral component of membrane	cellular_component	GO:0016021
TraesCS1B02G006300	integral component of membrane	cellular_component	GO:0016021	NB-ARC
TraesCS1B02G006300	integral component of membrane	cellular_component	GO:0016021	P-loop_NTPase
TraesCS1B02G006300	integral component of membrane	cellular_component	GO:0016021	LRR_dom_sf
TraesCS2A02G073800	nucleus	cellular_component	GO:0005634	Znf_CCHC
TraesCS2A02G073800	nucleus	cellular_component	GO:0005634	Put_53exo
TraesCS2A02G073800	nucleus	cellular_component	GO:0005634	Xrn2/3/4
TraesCS2A02G073800	nucleus	cellular_component	GO:0005634	5_3_exoribonuclease
TraesCS2A02G073800	nucleus	cellular_component	GO:0005634	Znf_CCHC_sf
TraesCS2A02G073800	nucleus	cellular_component	GO:0005634	Xrn1_helical
TraesCS2A02G550700	integral component of membrane	cellular_component	GO:0016021	Leu-rich_rpt
TraesCS2A02G550700	integral component of membrane	cellular_component	GO:0016021	Leu-rich_rpt_typical-subtyp
TraesCS2A02G550700	integral component of membrane	cellular_component	GO:0016021	LRR_N_plant-typ
TraesCS2A02G550700	integral component of membrane	cellular_component	GO:0016021	LRR_dom_sf
TraesCS2B02G024100	integral component of membrane	cellular_component	GO:0016021	Prot_kinase_dom
TraesCS2B02G024100	integral component of membrane	cellular_component	GO:0016021	Legume_lectin_dom
TraesCS2B02G024100	integral component of membrane	cellular_component	GO:0016021	Ser-Thr/Tyr_kinase_cat_dom
TraesCS2B02G024100	integral component of membrane	cellular_component	GO:0016021	Ser/Thr_kinase_AS
TraesCS2B02G024100	integral component of membrane	cellular_component	GO:0016021	Kinase-like_dom_sf
TraesCS2B02G024100	integral component of membrane	cellular_component	GO:0016021	ConA-like_dom_sf
TraesCS2B02G024100	integral component of membrane	cellular_component	GO:0016021	Lectin_legB_Mn/Ca_BS
TraesCS2B02G082100	integral component of membrane	cellular_component	GO:0016021	Prot_kinase_dom
TraesCS2B02G082100	integral component of membrane	cellular_component	GO:0016021	Leu-rich_rpt
TraesCS2B02G082100	integral component of membrane	cellular_component	GO:0016021	Ser/Thr_kinase_AS
TraesCS2B02G082100	integral component of membrane	cellular_component	GO:0016021	Kinase-like_dom_sf
TraesCS2B02G082100	integral component of membrane	cellular_component	GO:0016021	LRR_N_plant-typ
TraesCS2B02G082100	integral component of membrane	cellular_component	GO:0016021	LRR_dom_sf
TraesCS2B02G092600	integral component of membrane	cellular_component	GO:0016021	DUF594
TraesCS2B02G092600	integral component of membrane	cellular_component	GO:0016021	DUF4220
TraesCS2B02G377500	cytoplasm	cellular_component	GO:0005737	PRibTrfase_dom
TraesCS2B02G377500	cytoplasm	cellular_component	GO:0005737	Ade_phspho_trans
TraesCS2B02G377500	cytoplasm	cellular_component	GO:0005737	PRTase-like
TraesCS2B02G545100	integral component of membrane	cellular_component	GO:0016021	EamA_dom
TraesCS2B02G545100	membrane	cellular_component	GO:0016020	EamA_dom
TraesCS2B02G571500	exocyst	cellular_component	GO:0000145	Exo70
TraesCS2B02G571500	exocyst	cellular_component	GO:0000145	Cullin_repeat-like_dom_sf
TraesCS2D02G045700	integral component of membrane	cellular_component	GO:0016021	MFS_sugar_transport-like
TraesCS2D02G045700	integral component of membrane	cellular_component	GO:0016021	MFS_dom
TraesCS2D02G045700	integral component of membrane	cellular_component	GO:0016021	MFS_trans_sf
TraesCS2D02G045700	membrane	cellular_component	GO:0016020	MFS_sugar_transport-like
TraesCS2D02G045700	membrane	cellular_component	GO:0016020	MFS_dom
TraesCS2D02G045700	membrane	cellular_component	GO:0016020	MFS_trans_sf
TraesCS3A02G005500	integral component of membrane	cellular_component	GO:0016021	Mlo
TraesCS3A02G007000	integral component of membrane	cellular_component	GO:0016021
TraesCS3A02G133300	mitochondrion	cellular_component	GO:0005739	Gcp-like_dom
TraesCS3A02G133300	mitochondrion	cellular_component	GO:0005739	KAE1/TsaD
TraesCS3A02G133300	mitochondrion	cellular_component	GO:0005739	TsaD
TraesCS3A02G227100	integral component of membrane	cellular_component	GO:0016021	Prot_kinase_dom
TraesCS3A02G227100	integral component of membrane	cellular_component	GO:0016021	Ser/Thr_kinase_AS
TraesCS3A02G227100	integral component of membrane	cellular_component	GO:0016021	Kinase-like_dom_sf
TraesCS3A02G227100	integral component of membrane	cellular_component	GO:0016021	Protein_kinase_ATP_BS
TraesCS3A02G494700	membrane	cellular_component	GO:0016020	Oxid_FAD_bind_N
TraesCS3A02G494700	membrane	cellular_component	GO:0016020	ALO
TraesCS3A02G494700	membrane	cellular_component	GO:0016020	GULO_Plant
TraesCS3A02G494700	membrane	cellular_component	GO:0016020	FAD-bd_PCMH
TraesCS3A02G494700	membrane	cellular_component	GO:0016020	FAD-bd_PCMH_sub2
TraesCS3A02G494700	membrane	cellular_component	GO:0016020	FAD-bd_PCMH-like_sf
TraesCS3A02G499200	integral component of membrane	cellular_component	GO:0016021	MATE_fam
TraesCS3A02G499200	membrane	cellular_component	GO:0016020	MATE_fam
TraesCS3B02G025900	nucleus	cellular_component	GO:0005634	Histone_H3/CENP-A
TraesCS3B02G025900	nucleus	cellular_component	GO:0005634	Histone_H2A/H2B/H3
TraesCS3B02G025900	nucleus	cellular_component	GO:0005634	Histone-fold
TraesCS3B02G025900	nucleosome	cellular_component	GO:0000786	Histone_H3/CENP-A
TraesCS3B02G025900	nucleosome	cellular_component	GO:0000786	Histone_H2A/H2B/H3
TraesCS3B02G025900	nucleosome	cellular_component	GO:0000786	Histone-fold
TraesCS3B02G025900	chromosome	cellular_component	GO:0005694	Histone_H3/CENP-A
TraesCS3B02G025900	chromosome	cellular_component	GO:0005694	Histone_H2A/H2B/H3
TraesCS3B02G025900	chromosome	cellular_component	GO:0005694	Histone-fold
TraesCS3B02G158800	integral component of membrane	cellular_component	GO:0016021	AP2/ERF_dom
TraesCS3B02G158800	integral component of membrane	cellular_component	GO:0016021	DNA-bd_dom_sf
TraesCS3B02G158800	integral component of membrane	cellular_component	GO:0016021	AP2/ERF_dom_sf
TraesCS3B02G158800	nucleus	cellular_component	GO:0005634	AP2/ERF_dom
TraesCS3B02G158800	nucleus	cellular_component	GO:0005634	DNA-bd_dom_sf
TraesCS3B02G158800	nucleus	cellular_component	GO:0005634	AP2/ERF_dom_sf
TraesCS3B02G269700	thylakoid lumen	cellular_component	GO:0031977	PDZ
TraesCS3B02G269700	thylakoid lumen	cellular_component	GO:0031977	Peptidase_S41A
TraesCS3B02G269700	thylakoid lumen	cellular_component	GO:0031977	Tail-specific_protease
TraesCS3B02G269700	thylakoid lumen	cellular_component	GO:0031977	ClpP/crotonase-like_dom_sf
TraesCS3B02G269700	thylakoid lumen	cellular_component	GO:0031977	PDZ_sf
TraesCS3B02G269700	thylakoid lumen	cellular_component	GO:0031977	PDZ_6
TraesCS3B02G278300	chloroplast	cellular_component	GO:0009507	Methyltransf_11
TraesCS3B02G278300	chloroplast	cellular_component	GO:0009507	SAM-dependent_MTases
TraesCS3B02G474500	integral component of membrane	cellular_component	GO:0016021	Prot_kinase_dom
TraesCS3B02G474500	integral component of membrane	cellular_component	GO:0016021	EGF-like_dom
TraesCS3B02G474500	integral component of membrane	cellular_component	GO:0016021	EGF-like_Ca-bd_dom
TraesCS3B02G474500	integral component of membrane	cellular_component	GO:0016021	Ser/Thr_kinase_AS
TraesCS3B02G474500	integral component of membrane	cellular_component	GO:0016021	Growth_fac_rcpt_cys_sf
TraesCS3B02G474500	integral component of membrane	cellular_component	GO:0016021	Kinase-like_dom_sf
TraesCS3B02G474500	integral component of membrane	cellular_component	GO:0016021	Protein_kinase_ATP_BS
TraesCS3B02G474500	integral component of membrane	cellular_component	GO:0016021	EGF_Ca-bd_CS
TraesCS3B02G474500	integral component of membrane	cellular_component	GO:0016021	WAK_GUB
TraesCS3B02G474500	membrane	cellular_component	GO:0016020	Prot_kinase_dom
TraesCS3B02G474500	membrane	cellular_component	GO:0016020	EGF-like_dom
TraesCS3B02G474500	membrane	cellular_component	GO:0016020	EGF-like_Ca-bd_dom
TraesCS3B02G474500	membrane	cellular_component	GO:0016020	Ser/Thr_kinase_AS
TraesCS3B02G474500	membrane	cellular_component	GO:0016020	Growth_fac_rcpt_cys_sf
TraesCS3B02G474500	membrane	cellular_component	GO:0016020	Kinase-like_dom_sf
TraesCS3B02G474500	membrane	cellular_component	GO:0016020	Protein_kinase_ATP_BS
TraesCS3B02G474500	membrane	cellular_component	GO:0016020	EGF_Ca-bd_CS
TraesCS3B02G474500	membrane	cellular_component	GO:0016020	WAK_GUB
TraesCS3D02G497500	nucleus	cellular_component	GO:0005634	HMG_box_dom
TraesCS3D02G497500	nucleus	cellular_component	GO:0005634	HMG_box_dom_sf
TraesCS4A02G036200	peroxisome	cellular_component	GO:0005777	AMP-dep_Synth/Lig
TraesCS4A02G036200	peroxisome	cellular_component	GO:0005777	AMP-binding_CS
TraesCS4A02G036200	peroxisome	cellular_component	GO:0005777	AMP-bd_C
TraesCS4A02G036200	peroxisome	cellular_component	GO:0005777	AMP-dep_Synthh-like_sf
TraesCS4A02G179600	integral component of membrane	cellular_component	GO:0016021	Peptidase_S54_rhomboid
TraesCS4A02G179600	integral component of membrane	cellular_component	GO:0016021	Peptidase_S54_rhomboid_dom
TraesCS4A02G179600	integral component of membrane	cellular_component	GO:0016021	Rhomboid-like_sf
TraesCS4B02G170000	integral component of membrane	cellular_component	GO:0016021	EGF-like_Ca-bd_dom
TraesCS4B02G170000	integral component of membrane	cellular_component	GO:0016021	PA_domain
TraesCS4B02G170000	integral component of membrane	cellular_component	GO:0016021	EGF_Ca-bd_CS
TraesCS4B02G170000	integral component of membrane	cellular_component	GO:0016021	Thioredoxin-like_sf
TraesCS5A02G218400	membrane	cellular_component	GO:0016020	Iontro_rcpt
TraesCS5A02G218400	membrane	cellular_component	GO:0016020	Solute-binding_3/MltF_N
TraesCS5A02G218400	membrane	cellular_component	GO:0016020	ANF_lig-bd_rcpt
TraesCS5A02G218400	membrane	cellular_component	GO:0016020	Iontropic_Glu_rcpt_pln
TraesCS5A02G218400	membrane	cellular_component	GO:0016020	Peripla_BP_I
TraesCS5A02G527600	integral component of membrane	cellular_component	GO:0016021	Cyt_b245_heavy_chain
TraesCS5A02G527600	integral component of membrane	cellular_component	GO:0016021	EF_hand_dom
TraesCS5A02G527600	integral component of membrane	cellular_component	GO:0016021	EF-hand-dom_pair
TraesCS5A02G527600	integral component of membrane	cellular_component	GO:0016021	FAD-bd_8
TraesCS5A02G527600	integral component of membrane	cellular_component	GO:0016021	Fe_red_NAD-bd_6
TraesCS5A02G527600	integral component of membrane	cellular_component	GO:0016021	Fe3_Rdtase_TM_dom
TraesCS5A02G527600	integral component of membrane	cellular_component	GO:0016021	NADPH_Ox
TraesCS5A02G527600	integral component of membrane	cellular_component	GO:0016021	FAD-bd_FR_type
TraesCS5A02G527600	integral component of membrane	cellular_component	GO:0016021	Riboflavin_synthase-like_b-brl
TraesCS5A02G527600	integral component of membrane	cellular_component	GO:0016021	EF_Hand_1_Ca_BS
TraesCS5A02G527600	integral component of membrane	cellular_component	GO:0016021	RBOHB
TraesCS5A02G527600	integral component of membrane	cellular_component	GO:0016021	FNR_nucleotide-bd
TraesCS5A02G527600	membrane	cellular_component	GO:0016020	Cyt_b245_heavy_chain
TraesCS5A02G527600	membrane	cellular_component	GO:0016020	EF_hand_dom
TraesCS5A02G527600	membrane	cellular_component	GO:0016020	EF-hand-dom_pair
TraesCS5A02G527600	membrane	cellular_component	GO:0016020	FAD-bd_8
TraesCS5A02G527600	membrane	cellular_component	GO:0016020	Fe_red_NAD-bd_6
TraesCS5A02G527600	membrane	cellular_component	GO:0016020	Fe3_Rdtase_TM_dom
TraesCS5A02G527600	membrane	cellular_component	GO:0016020	NADPH_Ox
TraesCS5A02G527600	membrane	cellular_component	GO:0016020	FAD-bd_FR_type
TraesCS5A02G527600	membrane	cellular_component	GO:0016020	Riboflavin_synthase-like_b-brl
TraesCS5A02G527600	membrane	cellular_component	GO:0016020	EF_Hand_1_Ca_BS
TraesCS5A02G527600	membrane	cellular_component	GO:0016020	RBOHB
TraesCS5A02G527600	membrane	cellular_component	GO:0016020	FNR_nucleotide-bd
TraesCS5B02G218600	chloroplast thylakoid membrane	cellular_component	GO:0009535	Chloroa_b-bind
TraesCS5B02G218700	membrane	cellular_component	GO:0016020	Iontro_rcpt
TraesCS5B02G218700	membrane	cellular_component	GO:0016020	Solute-binding_3/MltF_N
TraesCS5B02G218700	membrane	cellular_component	GO:0016020	ANF_lig-bd_rcpt
TraesCS5B02G218700	membrane	cellular_component	GO:0016020	Iontropic_Glu_rcpt_pln
TraesCS5B02G218700	membrane	cellular_component	GO:0016020	Peripla_BP_I
TraesCS5D02G272100	chloroplast thylakoid membrane	cellular_component	GO:0009535	PPIase_FKBP_dom
TraesCS6A02G009100	integral component of membrane	cellular_component	GO:0016021	SWEET_sugar_transpr
TraesCS6A02G009100	plasma membrane	cellular_component	GO:0005886	SWEET_sugar_transpr
TraesCS6A02G032700	extracellular region	cellular_component	GO:0005576	LolPI
TraesCS6A02G032700	extracellular region	cellular_component	GO:0005576	Expansin/allergen_DPBB_dom
TraesCS6A02G032700	extracellular region	cellular_component	GO:0005576	Expansin_CBD
TraesCS6A02G032700	extracellular region	cellular_component	GO:0005576	Expan_Lol_pI
TraesCS6A02G032700	extracellular region	cellular_component	GO:0005576	RlpA-like_DPBB
TraesCS6A02G032700	extracellular region	cellular_component	GO:0005576	Expansin_CBD_sf
TraesCS6A02G032700	extracellular region	cellular_component	GO:0005576	RlpA-like_sf
TraesCS6A02G042600	endoplasmic reticulum lumen	cellular_component	GO:0005788	Hsp_70_fam
TraesCS6A02G042600	endoplasmic reticulum lumen	cellular_component	GO:0005788	Heat_shock_70_CS
TraesCS6A02G042600	endoplasmic reticulum lumen	cellular_component	GO:0005788	HSP70_peptide-bd_sf
TraesCS6A02G042600	endoplasmic reticulum lumen	cellular_component	GO:0005788	HSP70_C_sf
TraesCS6A02G042600	endoplasmic reticulum lumen	cellular_component	GO:0005788	BIP_NBD
TraesCS6A02G042600	plant-type vacuole membrane	cellular_component	GO:0009705	Hsp_70_fam
TraesCS6A02G042600	plant-type vacuole membrane	cellular_component	GO:0009705	Heat_shock_70_CS
TraesCS6A02G042600	plant-type vacuole membrane	cellular_component	GO:0009705	HSP70_peptide-bd_sf
TraesCS6A02G042600	plant-type vacuole membrane	cellular_component	GO:0009705	HSP70_C_sf
TraesCS6A02G042600	plant-type vacuole membrane	cellular_component	GO:0009705	BIP_NBD
TraesCS6A02G058500	integral component of membrane	cellular_component	GO:0016021	Prot_kinase_dom
TraesCS6A02G058500	integral component of membrane	cellular_component	GO:0016021	Legume_lectin_dom
TraesCS6A02G058500	integral component of membrane	cellular_component	GO:0016021	Ser/Thr_kinase_AS
TraesCS6A02G058500	integral component of membrane	cellular_component	GO:0016021	Kinase-like_dom_sf
TraesCS6A02G058500	integral component of membrane	cellular_component	GO:0016021	ConA-like_dom_sf
TraesCS6A02G058500	integral component of membrane	cellular_component	GO:0016021	Protein_kinase_ATP_BS
TraesCS6A02G058500	integral component of membrane	cellular_component	GO:0016021	Lectin_legB_Mn/Ca_BS
TraesCS6A02G058500	integral component of membrane	cellular_component	GO:0016021	SRK-like_kinase
TraesCS6A02G058600	integral component of membrane	cellular_component	GO:0016021	Leu-rich_rpt
TraesCS6A02G058600	integral component of membrane	cellular_component	GO:0016021	Leu-rich_rpt_typical-subtyp
TraesCS6A02G058600	integral component of membrane	cellular_component	GO:0016021	LRR_N_plant-typ
TraesCS6A02G058600	integral component of membrane	cellular_component	GO:0016021	LRR_dom_sf
TraesCS6B02G417400	phragmoplast	cellular_component	GO:0009524	Kinesin_motor_dom
TraesCS6B02G417400	phragmoplast	cellular_component	GO:0009524	P-loop_NTPase
TraesCS6B02G417400	phragmoplast	cellular_component	GO:0009524	Kinesin-like_fam
TraesCS6B02G417400	phragmoplast	cellular_component	GO:0009524	Kinesin_motor_dom_sf
TraesCS6D02G037700	extracellular region	cellular_component	GO:0005576	LolPI
TraesCS6D02G037700	extracellular region	cellular_component	GO:0005576	Expansin/allergen_DPBB_dom
TraesCS6D02G037700	extracellular region	cellular_component	GO:0005576	Expansin_CBD
TraesCS6D02G037700	extracellular region	cellular_component	GO:0005576	Expan_Lol_pI
TraesCS6D02G037700	extracellular region	cellular_component	GO:0005576	RlpA-like_DPBB
TraesCS6D02G037700	extracellular region	cellular_component	GO:0005576	Expansin_CBD_sf
TraesCS6D02G037700	extracellular region	cellular_component	GO:0005576	RlpA-like_sf
TraesCS6D02G375700	integral component of membrane	cellular_component	GO:0016021	Prot_kinase_dom
TraesCS6D02G375700	integral component of membrane	cellular_component	GO:0016021	S_locus_glycoprot_dom
TraesCS6D02G375700	integral component of membrane	cellular_component	GO:0016021	Ser-Thr/Tyr_kinase_cat_dom
TraesCS6D02G375700	integral component of membrane	cellular_component	GO:0016021	Bulb-type_lectin_dom
TraesCS6D02G375700	integral component of membrane	cellular_component	GO:0016021	Pan_app
TraesCS6D02G375700	integral component of membrane	cellular_component	GO:0016021	Ser/Thr_kinase_AS
TraesCS6D02G375700	integral component of membrane	cellular_component	GO:0016021	Kinase-like_dom_sf
TraesCS6D02G375700	integral component of membrane	cellular_component	GO:0016021	Protein_kinase_ATP_BS
TraesCS6D02G375700	integral component of membrane	cellular_component	GO:0016021	SRK-like_kinase
TraesCS6D02G375700	integral component of membrane	cellular_component	GO:0016021	Bulb-type_lectin_dom_sf
TraesCS7D02G555000	integral component of membrane	cellular_component	GO:0016021	Cellulose_synth
TraesCS7D02G555000	integral component of membrane	cellular_component	GO:0016021	Nucleotide-diphossugar_trans
TraesCS7D02G555000	membrane	cellular_component	GO:0016020	Cellulose_synth
TraesCS7D02G555000	membrane	cellular_component	GO:0016020	Nucleotide-diphossugar_trans
TraesCSU02G154600	integral component of membrane	cellular_component	GO:0016021	CcO_II-like_C
TraesCSU02G154600	integral component of membrane	cellular_component	GO:0016021	Cupredoxin
TraesCSU02G154600	integral component of membrane	cellular_component	GO:0016021	Cyt_c_oxidase_su2_TM_dom
TraesCSU02G154600	integral component of membrane	cellular_component	GO:0016021	CcO_II_C
TraesCSU02G154600	integral component of membrane	cellular_component	GO:0016021	Cyt_c_oxidase_su2_TM_sf
TraesCSU02G154600	membrane	cellular_component	GO:0016020	CcO_II-like_C
TraesCSU02G154600	membrane	cellular_component	GO:0016020	Cupredoxin
TraesCSU02G154600	membrane	cellular_component	GO:0016020	Cyt_c_oxidase_su2_TM_dom
TraesCSU02G154600	membrane	cellular_component	GO:0016020	CcO_II_C
TraesCSU02G154600	membrane	cellular_component	GO:0016020	Cyt_c_oxidase_su2_TM_sf
TraesCSU02G206500	integral component of membrane	cellular_component	GO:0016021	Cyt_P450
TraesCSU02G206500	integral component of membrane	cellular_component	GO:0016021	Cyt_P450_E_grp-I
TraesCSU02G206500	integral component of membrane	cellular_component	GO:0016021	Cyt_P450_CS
TraesCSU02G206500	integral component of membrane	cellular_component	GO:0016021	Cyt_P450_sf
TraesCS1A02G032900	GO_0015238	go	GO:0015238	MATE_fam
TraesCS3A02G499200	GO_0015238	go	GO:0015238	MATE_fam
TraesCS1A02G004900	protein binding	molecular_function	GO:0005515	Leu-rich_rpt
TraesCS1A02G004900	protein binding	molecular_function	GO:0005515	Leu-rich_rpt_Cys-con_subtyp
TraesCS1A02G004900	protein binding	molecular_function	GO:0005515	LRR_dom_sf
TraesCS1A02G032800	pyridoxal phosphate binding	molecular_function	GO:0030170	PyrdxlP-dep_de-COase
TraesCS1A02G032800	pyridoxal phosphate binding	molecular_function	GO:0030170	Aromatic_deC
TraesCS1A02G032800	pyridoxal phosphate binding	molecular_function	GO:0030170	PyrdxlP-dep_Trfase_major
TraesCS1A02G032800	pyridoxal phosphate binding	molecular_function	GO:0030170	PyrdxlP-dep_Trfase_dom1
TraesCS1A02G032800	pyridoxal phosphate binding	molecular_function	GO:0030170	PyrdxlP-dep_Trfase
TraesCS1A02G032800	catalytic activity	molecular_function	GO:0003824	PyrdxlP-dep_de-COase
TraesCS1A02G032800	catalytic activity	molecular_function	GO:0003824	Aromatic_deC
TraesCS1A02G032800	catalytic activity	molecular_function	GO:0003824	PyrdxlP-dep_Trfase_major
TraesCS1A02G032800	catalytic activity	molecular_function	GO:0003824	PyrdxlP-dep_Trfase_dom1
TraesCS1A02G032800	catalytic activity	molecular_function	GO:0003824	PyrdxlP-dep_Trfase
TraesCS1A02G032800	carboxy-lyase activity	molecular_function	GO:0016831	PyrdxlP-dep_de-COase
TraesCS1A02G032800	carboxy-lyase activity	molecular_function	GO:0016831	Aromatic_deC
TraesCS1A02G032800	carboxy-lyase activity	molecular_function	GO:0016831	PyrdxlP-dep_Trfase_major
TraesCS1A02G032800	carboxy-lyase activity	molecular_function	GO:0016831	PyrdxlP-dep_Trfase_dom1
TraesCS1A02G032800	carboxy-lyase activity	molecular_function	GO:0016831	PyrdxlP-dep_Trfase
TraesCS1A02G032900	antiporter activity	molecular_function	GO:0015297	MATE_fam
TraesCS1A02G032900	xenobiotic transmembrane transporter activity	molecular_function	GO:0042910	MATE_fam
TraesCS1B02G006300	ADP binding	molecular_function	GO:0043531	NB-ARC
TraesCS1B02G006300	ADP binding	molecular_function	GO:0043531	P-loop_NTPase
TraesCS1B02G006300	ADP binding	molecular_function	GO:0043531	LRR_dom_sf
TraesCS1B02G019000	ADP binding	molecular_function	GO:0043531	NB-ARC
TraesCS1B02G019000	ADP binding	molecular_function	GO:0043531	P-loop_NTPase
TraesCS1B02G019000	ADP binding	molecular_function	GO:0043531	RX-like_CC
TraesCS1B02G019000	ADP binding	molecular_function	GO:0043531	Rx_N
TraesCS1B02G022300	ATP binding	molecular_function	GO:0005524	Prot_kinase_dom
TraesCS1B02G022300	ATP binding	molecular_function	GO:0005524	Ser/Thr_kinase_AS
TraesCS1B02G022300	ATP binding	molecular_function	GO:0005524	Kinase-like_dom_sf
TraesCS1B02G022300	ATP binding	molecular_function	GO:0005524	Protein_kinase_ATP_BS
TraesCS1B02G022300	protein kinase activity	molecular_function	GO:0004672	Prot_kinase_dom
TraesCS1B02G022300	protein kinase activity	molecular_function	GO:0004672	Ser/Thr_kinase_AS
TraesCS1B02G022300	protein kinase activity	molecular_function	GO:0004672	Kinase-like_dom_sf
TraesCS1B02G022300	protein kinase activity	molecular_function	GO:0004672	Protein_kinase_ATP_BS
TraesCS1B02G115600	protein phosphatase inhibitor activity	molecular_function	GO:0004864	Bet_v_I/MLP
TraesCS1B02G115600	protein phosphatase inhibitor activity	molecular_function	GO:0004864	START-like_dom_sf
TraesCS1B02G115600	protein phosphatase inhibitor activity	molecular_function	GO:0004864	Bet_v_I_allergen
TraesCS1B02G115600	abscisic acid binding	molecular_function	GO:0010427	Bet_v_I/MLP
TraesCS1B02G115600	abscisic acid binding	molecular_function	GO:0010427	START-like_dom_sf
TraesCS1B02G115600	abscisic acid binding	molecular_function	GO:0010427	Bet_v_I_allergen
TraesCS1B02G115600	signaling receptor activity	molecular_function	GO:0038023	Bet_v_I/MLP
TraesCS1B02G115600	signaling receptor activity	molecular_function	GO:0038023	START-like_dom_sf
TraesCS1B02G115600	signaling receptor activity	molecular_function	GO:0038023	Bet_v_I_allergen
TraesCS1B02G334000	DNA-binding transcription factor activity	molecular_function	GO:0003700	SPEAR
TraesCS1B02G419200	ATP binding	molecular_function	GO:0005524	CDC4_N-term_subdom
TraesCS1B02G419200	ATP binding	molecular_function	GO:0005524	AAA+_ATPase
TraesCS1B02G419200	ATP binding	molecular_function	GO:0005524	ATPase_AAA_core
TraesCS1B02G419200	ATP binding	molecular_function	GO:0005524	ATPase_AAA_CS
TraesCS1B02G419200	ATP binding	molecular_function	GO:0005524	Cdc48_dom2
TraesCS1B02G419200	ATP binding	molecular_function	GO:0005524	AAA_ATPase_CDC48
TraesCS1B02G419200	ATP binding	molecular_function	GO:0005524	Asp_de-COase-like_dom_sf
TraesCS1B02G419200	ATP binding	molecular_function	GO:0005524	P-loop_NTPase
TraesCS1B02G419200	ATP binding	molecular_function	GO:0005524	CDC48_domain_2-like_sf
TraesCS1B02G419200	ATP binding	molecular_function	GO:0005524	AAA_lid_3
TraesCS1B02G419200	hydrolase activity	molecular_function	GO:0016787	CDC4_N-term_subdom
TraesCS1B02G419200	hydrolase activity	molecular_function	GO:0016787	AAA+_ATPase
TraesCS1B02G419200	hydrolase activity	molecular_function	GO:0016787	ATPase_AAA_core
TraesCS1B02G419200	hydrolase activity	molecular_function	GO:0016787	ATPase_AAA_CS
TraesCS1B02G419200	hydrolase activity	molecular_function	GO:0016787	Cdc48_dom2
TraesCS1B02G419200	hydrolase activity	molecular_function	GO:0016787	AAA_ATPase_CDC48
TraesCS1B02G419200	hydrolase activity	molecular_function	GO:0016787	Asp_de-COase-like_dom_sf
TraesCS1B02G419200	hydrolase activity	molecular_function	GO:0016787	P-loop_NTPase
TraesCS1B02G419200	hydrolase activity	molecular_function	GO:0016787	CDC48_domain_2-like_sf
TraesCS1B02G419200	hydrolase activity	molecular_function	GO:0016787	AAA_lid_3
TraesCS1B02G430800	ATP binding	molecular_function	GO:0005524	ABC_transporter-like
TraesCS1B02G430800	ATP binding	molecular_function	GO:0005524	AAA+_ATPase
TraesCS1B02G430800	ATP binding	molecular_function	GO:0005524	ABC_transporter_CS
TraesCS1B02G430800	ATP binding	molecular_function	GO:0005524	P-loop_NTPase
TraesCS1B02G430800	ATPase activity	molecular_function	GO:0016887	ABC_transporter-like
TraesCS1B02G430800	ATPase activity	molecular_function	GO:0016887	AAA+_ATPase
TraesCS1B02G430800	ATPase activity	molecular_function	GO:0016887	ABC_transporter_CS
TraesCS1B02G430800	ATPase activity	molecular_function	GO:0016887	P-loop_NTPase
TraesCS1B02G465300	zinc ion binding	molecular_function	GO:0008270	Znf_RING-CH
TraesCS1B02G465300	zinc ion binding	molecular_function	GO:0008270	Znf_RING/FYVE/PHD
TraesCS1B02G469800	oxidoreductase activity	molecular_function	GO:0016491	Oxid_FAD_bind_N
TraesCS1B02G469800	oxidoreductase activity	molecular_function	GO:0016491	BBE
TraesCS1B02G469800	oxidoreductase activity	molecular_function	GO:0016491	FAD-bd_PCMH
TraesCS1B02G469800	oxidoreductase activity	molecular_function	GO:0016491	FAD-bd_PCMH_sub1
TraesCS1B02G469800	oxidoreductase activity	molecular_function	GO:0016491	FAD-bd_PCMH-like_sf
TraesCS1B02G469800	FAD binding	molecular_function	GO:0071949	Oxid_FAD_bind_N
TraesCS1B02G469800	FAD binding	molecular_function	GO:0071949	BBE
TraesCS1B02G469800	FAD binding	molecular_function	GO:0071949	FAD-bd_PCMH
TraesCS1B02G469800	FAD binding	molecular_function	GO:0071949	FAD-bd_PCMH_sub1
TraesCS1B02G469800	FAD binding	molecular_function	GO:0071949	FAD-bd_PCMH-like_sf
TraesCS1B02G469800	flavin adenine dinucleotide binding	molecular_function	GO:0050660	Oxid_FAD_bind_N
TraesCS1B02G469800	flavin adenine dinucleotide binding	molecular_function	GO:0050660	BBE
TraesCS1B02G469800	flavin adenine dinucleotide binding	molecular_function	GO:0050660	FAD-bd_PCMH
TraesCS1B02G469800	flavin adenine dinucleotide binding	molecular_function	GO:0050660	FAD-bd_PCMH_sub1
TraesCS1B02G469800	flavin adenine dinucleotide binding	molecular_function	GO:0050660	FAD-bd_PCMH-like_sf
TraesCS1D02G017200	protein binding	molecular_function	GO:0005515	Glutathione_S-Trfase_N
TraesCS1D02G017200	protein binding	molecular_function	GO:0005515	GST_C
TraesCS1D02G017200	protein binding	molecular_function	GO:0005515	Glutathione-S-Trfase_C-like
TraesCS1D02G017200	protein binding	molecular_function	GO:0005515	Thioredoxin-like_sf
TraesCS1D02G017200	protein binding	molecular_function	GO:0005515	Glutathione-S-Trfase_C_sf
TraesCS1D02G017600	ADP binding	molecular_function	GO:0043531	NB-ARC
TraesCS1D02G017600	ADP binding	molecular_function	GO:0043531	P-loop_NTPase
TraesCS1D02G017600	ADP binding	molecular_function	GO:0043531	LRR_dom_sf
TraesCS1D02G017600	ADP binding	molecular_function	GO:0043531	RX-like_CC
TraesCS1D02G017600	ADP binding	molecular_function	GO:0043531	Rx_N
TraesCS1D02G017600	ATP binding	molecular_function	GO:0005524	NB-ARC
TraesCS1D02G017600	ATP binding	molecular_function	GO:0005524	P-loop_NTPase
TraesCS1D02G017600	ATP binding	molecular_function	GO:0005524	LRR_dom_sf
TraesCS1D02G017600	ATP binding	molecular_function	GO:0005524	RX-like_CC
TraesCS1D02G017600	ATP binding	molecular_function	GO:0005524	Rx_N
TraesCS1D02G017600	nucleotide binding	molecular_function	GO:0000166	NB-ARC
TraesCS1D02G017600	nucleotide binding	molecular_function	GO:0000166	P-loop_NTPase
TraesCS1D02G017600	nucleotide binding	molecular_function	GO:0000166	LRR_dom_sf
TraesCS1D02G017600	nucleotide binding	molecular_function	GO:0000166	RX-like_CC
TraesCS1D02G017600	nucleotide binding	molecular_function	GO:0000166	Rx_N
TraesCS2A02G073800	nucleic acid binding	molecular_function	GO:0003676	Znf_CCHC
TraesCS2A02G073800	nucleic acid binding	molecular_function	GO:0003676	Put_53exo
TraesCS2A02G073800	nucleic acid binding	molecular_function	GO:0003676	Xrn2/3/4
TraesCS2A02G073800	nucleic acid binding	molecular_function	GO:0003676	5_3_exoribonuclease
TraesCS2A02G073800	nucleic acid binding	molecular_function	GO:0003676	Znf_CCHC_sf
TraesCS2A02G073800	nucleic acid binding	molecular_function	GO:0003676	Xrn1_helical
TraesCS2A02G073800	zinc ion binding	molecular_function	GO:0008270	Znf_CCHC
TraesCS2A02G073800	zinc ion binding	molecular_function	GO:0008270	Put_53exo
TraesCS2A02G073800	zinc ion binding	molecular_function	GO:0008270	Xrn2/3/4
TraesCS2A02G073800	zinc ion binding	molecular_function	GO:0008270	5_3_exoribonuclease
TraesCS2A02G073800	zinc ion binding	molecular_function	GO:0008270	Znf_CCHC_sf
TraesCS2A02G073800	zinc ion binding	molecular_function	GO:0008270	Xrn1_helical
TraesCS2A02G073800	5'-3' exoribonuclease activity	molecular_function	GO:0004534	Znf_CCHC
TraesCS2A02G073800	5'-3' exoribonuclease activity	molecular_function	GO:0004534	Put_53exo
TraesCS2A02G073800	5'-3' exoribonuclease activity	molecular_function	GO:0004534	Xrn2/3/4
TraesCS2A02G073800	5'-3' exoribonuclease activity	molecular_function	GO:0004534	5_3_exoribonuclease
TraesCS2A02G073800	5'-3' exoribonuclease activity	molecular_function	GO:0004534	Znf_CCHC_sf
TraesCS2A02G073800	5'-3' exoribonuclease activity	molecular_function	GO:0004534	Xrn1_helical
TraesCS2A02G073800	exonuclease activity	molecular_function	GO:0004527	Znf_CCHC
TraesCS2A02G073800	exonuclease activity	molecular_function	GO:0004527	Put_53exo
TraesCS2A02G073800	exonuclease activity	molecular_function	GO:0004527	Xrn2/3/4
TraesCS2A02G073800	exonuclease activity	molecular_function	GO:0004527	5_3_exoribonuclease
TraesCS2A02G073800	exonuclease activity	molecular_function	GO:0004527	Znf_CCHC_sf
TraesCS2A02G073800	exonuclease activity	molecular_function	GO:0004527	Xrn1_helical
TraesCS2A02G471000	protein binding	molecular_function	GO:0005515	BTB/POZ_dom
TraesCS2A02G471000	protein binding	molecular_function	GO:0005515	MATH/TRAF_dom
TraesCS2A02G471000	protein binding	molecular_function	GO:0005515	TRAF-like
TraesCS2A02G471000	protein binding	molecular_function	GO:0005515	SKP1/BTB/POZ_sf
TraesCS2A02G471000	protein binding	molecular_function	GO:0005515	BPM_C
TraesCS2A02G471200	protein binding	molecular_function	GO:0005515	BTB/POZ_dom
TraesCS2A02G471200	protein binding	molecular_function	GO:0005515	SKP1/BTB/POZ_sf
TraesCS2A02G471200	protein binding	molecular_function	GO:0005515	BPM_C
TraesCS2A02G471300	transferase activity, transferring acyl groups other than amino-acyl groups	molecular_function	GO:0016747	Transferase
TraesCS2A02G471300	transferase activity, transferring acyl groups other than amino-acyl groups	molecular_function	GO:0016747	CAT-like_dom_sf
TraesCS2A02G550700	protein binding	molecular_function	GO:0005515	Leu-rich_rpt
TraesCS2A02G550700	protein binding	molecular_function	GO:0005515	Leu-rich_rpt_typical-subtyp
TraesCS2A02G550700	protein binding	molecular_function	GO:0005515	LRR_N_plant-typ
TraesCS2A02G550700	protein binding	molecular_function	GO:0005515	LRR_dom_sf
TraesCS2B02G011200	protein binding	molecular_function	GO:0005515	Leu-rich_rpt
TraesCS2B02G011200	protein binding	molecular_function	GO:0005515	LRR_N_plant-typ
TraesCS2B02G011200	protein binding	molecular_function	GO:0005515	LRR_dom_sf
TraesCS2B02G024000	ATP binding	molecular_function	GO:0005524	Prot_kinase_dom
TraesCS2B02G024000	ATP binding	molecular_function	GO:0005524	Ser/Thr_kinase_AS
TraesCS2B02G024000	ATP binding	molecular_function	GO:0005524	Kinase-like_dom_sf
TraesCS2B02G024000	protein kinase activity	molecular_function	GO:0004672	Prot_kinase_dom
TraesCS2B02G024000	protein kinase activity	molecular_function	GO:0004672	Ser/Thr_kinase_AS
TraesCS2B02G024000	protein kinase activity	molecular_function	GO:0004672	Kinase-like_dom_sf
TraesCS2B02G024100	carbohydrate binding	molecular_function	GO:0030246	Prot_kinase_dom
TraesCS2B02G024100	carbohydrate binding	molecular_function	GO:0030246	Legume_lectin_dom
TraesCS2B02G024100	carbohydrate binding	molecular_function	GO:0030246	Ser-Thr/Tyr_kinase_cat_dom
TraesCS2B02G024100	carbohydrate binding	molecular_function	GO:0030246	Ser/Thr_kinase_AS
TraesCS2B02G024100	carbohydrate binding	molecular_function	GO:0030246	Kinase-like_dom_sf
TraesCS2B02G024100	carbohydrate binding	molecular_function	GO:0030246	ConA-like_dom_sf
TraesCS2B02G024100	carbohydrate binding	molecular_function	GO:0030246	Lectin_legB_Mn/Ca_BS
TraesCS2B02G024100	ATP binding	molecular_function	GO:0005524	Prot_kinase_dom
TraesCS2B02G024100	ATP binding	molecular_function	GO:0005524	Legume_lectin_dom
TraesCS2B02G024100	ATP binding	molecular_function	GO:0005524	Ser-Thr/Tyr_kinase_cat_dom
TraesCS2B02G024100	ATP binding	molecular_function	GO:0005524	Ser/Thr_kinase_AS
TraesCS2B02G024100	ATP binding	molecular_function	GO:0005524	Kinase-like_dom_sf
TraesCS2B02G024100	ATP binding	molecular_function	GO:0005524	ConA-like_dom_sf
TraesCS2B02G024100	ATP binding	molecular_function	GO:0005524	Lectin_legB_Mn/Ca_BS
TraesCS2B02G024100	protein kinase activity	molecular_function	GO:0004672	Prot_kinase_dom
TraesCS2B02G024100	protein kinase activity	molecular_function	GO:0004672	Legume_lectin_dom
TraesCS2B02G024100	protein kinase activity	molecular_function	GO:0004672	Ser-Thr/Tyr_kinase_cat_dom
TraesCS2B02G024100	protein kinase activity	molecular_function	GO:0004672	Ser/Thr_kinase_AS
TraesCS2B02G024100	protein kinase activity	molecular_function	GO:0004672	Kinase-like_dom_sf
TraesCS2B02G024100	protein kinase activity	molecular_function	GO:0004672	ConA-like_dom_sf
TraesCS2B02G024100	protein kinase activity	molecular_function	GO:0004672	Lectin_legB_Mn/Ca_BS
TraesCS2B02G082100	ATP binding	molecular_function	GO:0005524	Prot_kinase_dom
TraesCS2B02G082100	ATP binding	molecular_function	GO:0005524	Leu-rich_rpt
TraesCS2B02G082100	ATP binding	molecular_function	GO:0005524	Ser/Thr_kinase_AS
TraesCS2B02G082100	ATP binding	molecular_function	GO:0005524	Kinase-like_dom_sf
TraesCS2B02G082100	ATP binding	molecular_function	GO:0005524	LRR_N_plant-typ
TraesCS2B02G082100	ATP binding	molecular_function	GO:0005524	LRR_dom_sf
TraesCS2B02G082100	protein kinase activity	molecular_function	GO:0004672	Prot_kinase_dom
TraesCS2B02G082100	protein kinase activity	molecular_function	GO:0004672	Leu-rich_rpt
TraesCS2B02G082100	protein kinase activity	molecular_function	GO:0004672	Ser/Thr_kinase_AS
TraesCS2B02G082100	protein kinase activity	molecular_function	GO:0004672	Kinase-like_dom_sf
TraesCS2B02G082100	protein kinase activity	molecular_function	GO:0004672	LRR_N_plant-typ
TraesCS2B02G082100	protein kinase activity	molecular_function	GO:0004672	LRR_dom_sf
TraesCS2B02G082100	protein binding	molecular_function	GO:0005515	Prot_kinase_dom
TraesCS2B02G082100	protein binding	molecular_function	GO:0005515	Leu-rich_rpt
TraesCS2B02G082100	protein binding	molecular_function	GO:0005515	Ser/Thr_kinase_AS
TraesCS2B02G082100	protein binding	molecular_function	GO:0005515	Kinase-like_dom_sf
TraesCS2B02G082100	protein binding	molecular_function	GO:0005515	LRR_N_plant-typ
TraesCS2B02G082100	protein binding	molecular_function	GO:0005515	LRR_dom_sf
TraesCS2B02G173500	metal ion binding	molecular_function	GO:0046872	Peroxidase_pln
TraesCS2B02G173500	metal ion binding	molecular_function	GO:0046872	Haem_peroxidase
TraesCS2B02G173500	metal ion binding	molecular_function	GO:0046872	Haem_peroxidase_sf
TraesCS2B02G173500	metal ion binding	molecular_function	GO:0046872	Peroxidases_heam-ligand_BS
TraesCS2B02G173500	metal ion binding	molecular_function	GO:0046872	Peroxidases_AS
TraesCS2B02G173500	metal ion binding	molecular_function	GO:0046872	Secretory_peroxidase
TraesCS2B02G173500	peroxidase activity	molecular_function	GO:0004601	Peroxidase_pln
TraesCS2B02G173500	peroxidase activity	molecular_function	GO:0004601	Haem_peroxidase
TraesCS2B02G173500	peroxidase activity	molecular_function	GO:0004601	Haem_peroxidase_sf
TraesCS2B02G173500	peroxidase activity	molecular_function	GO:0004601	Peroxidases_heam-ligand_BS
TraesCS2B02G173500	peroxidase activity	molecular_function	GO:0004601	Peroxidases_AS
TraesCS2B02G173500	peroxidase activity	molecular_function	GO:0004601	Secretory_peroxidase
TraesCS2B02G173500	heme binding	molecular_function	GO:0020037	Peroxidase_pln
TraesCS2B02G173500	heme binding	molecular_function	GO:0020037	Haem_peroxidase
TraesCS2B02G173500	heme binding	molecular_function	GO:0020037	Haem_peroxidase_sf
TraesCS2B02G173500	heme binding	molecular_function	GO:0020037	Peroxidases_heam-ligand_BS
TraesCS2B02G173500	heme binding	molecular_function	GO:0020037	Peroxidases_AS
TraesCS2B02G173500	heme binding	molecular_function	GO:0020037	Secretory_peroxidase
TraesCS2B02G269700	protein binding	molecular_function	GO:0005515	Pentatricopeptide_repeat
TraesCS2B02G269700	protein binding	molecular_function	GO:0005515	TPR-like_helical_dom_sf
TraesCS2B02G271000	oxidoreductase activity	molecular_function	GO:0016491	FAD-dep_OxRdtase
TraesCS2B02G271000	oxidoreductase activity	molecular_function	GO:0016491	FAD/NAD-bd_sf
TraesCS2B02G327300	hydrolase activity, hydrolyzing O-glycosyl compounds	molecular_function	GO:0004553	Glyco_hydro_13_N
TraesCS2B02G327300	hydrolase activity, hydrolyzing O-glycosyl compounds	molecular_function	GO:0004553	Glyco_hydro_13_cat_dom
TraesCS2B02G327300	hydrolase activity, hydrolyzing O-glycosyl compounds	molecular_function	GO:0004553	A-amylase/branching_C
TraesCS2B02G327300	hydrolase activity, hydrolyzing O-glycosyl compounds	molecular_function	GO:0004553	Glyco_hydro_b
TraesCS2B02G327300	hydrolase activity, hydrolyzing O-glycosyl compounds	molecular_function	GO:0004553	Ig-like_fold
TraesCS2B02G327300	hydrolase activity, hydrolyzing O-glycosyl compounds	molecular_function	GO:0004553	Ig_E-set
TraesCS2B02G327300	hydrolase activity, hydrolyzing O-glycosyl compounds	molecular_function	GO:0004553	Glycoside_hydrolase_SF
TraesCS2B02G327300	hydrolase activity, hydrolyzing O-glycosyl compounds	molecular_function	GO:0004553	Branching_enzy
TraesCS2B02G327300	catalytic activity	molecular_function	GO:0003824	Glyco_hydro_13_N
TraesCS2B02G327300	catalytic activity	molecular_function	GO:0003824	Glyco_hydro_13_cat_dom
TraesCS2B02G327300	catalytic activity	molecular_function	GO:0003824	A-amylase/branching_C
TraesCS2B02G327300	catalytic activity	molecular_function	GO:0003824	Glyco_hydro_b
TraesCS2B02G327300	catalytic activity	molecular_function	GO:0003824	Ig-like_fold
TraesCS2B02G327300	catalytic activity	molecular_function	GO:0003824	Ig_E-set
TraesCS2B02G327300	catalytic activity	molecular_function	GO:0003824	Glycoside_hydrolase_SF
TraesCS2B02G327300	catalytic activity	molecular_function	GO:0003824	Branching_enzy
TraesCS2B02G327300	cation binding	molecular_function	GO:0043169	Glyco_hydro_13_N
TraesCS2B02G327300	cation binding	molecular_function	GO:0043169	Glyco_hydro_13_cat_dom
TraesCS2B02G327300	cation binding	molecular_function	GO:0043169	A-amylase/branching_C
TraesCS2B02G327300	cation binding	molecular_function	GO:0043169	Glyco_hydro_b
TraesCS2B02G327300	cation binding	molecular_function	GO:0043169	Ig-like_fold
TraesCS2B02G327300	cation binding	molecular_function	GO:0043169	Ig_E-set
TraesCS2B02G327300	cation binding	molecular_function	GO:0043169	Glycoside_hydrolase_SF
TraesCS2B02G327300	cation binding	molecular_function	GO:0043169	Branching_enzy
TraesCS2B02G327300	1,4-alpha-glucan branching enzyme activity	molecular_function	GO:0003844	Glyco_hydro_13_N
TraesCS2B02G327300	1,4-alpha-glucan branching enzyme activity	molecular_function	GO:0003844	Glyco_hydro_13_cat_dom
TraesCS2B02G327300	1,4-alpha-glucan branching enzyme activity	molecular_function	GO:0003844	A-amylase/branching_C
TraesCS2B02G327300	1,4-alpha-glucan branching enzyme activity	molecular_function	GO:0003844	Glyco_hydro_b
TraesCS2B02G327300	1,4-alpha-glucan branching enzyme activity	molecular_function	GO:0003844	Ig-like_fold
TraesCS2B02G327300	1,4-alpha-glucan branching enzyme activity	molecular_function	GO:0003844	Ig_E-set
TraesCS2B02G327300	1,4-alpha-glucan branching enzyme activity	molecular_function	GO:0003844	Glycoside_hydrolase_SF
TraesCS2B02G327300	1,4-alpha-glucan branching enzyme activity	molecular_function	GO:0003844	Branching_enzy
TraesCS2B02G377500	adenine phosphoribosyltransferase activity	molecular_function	GO:0003999	PRibTrfase_dom
TraesCS2B02G377500	adenine phosphoribosyltransferase activity	molecular_function	GO:0003999	Ade_phspho_trans
TraesCS2B02G377500	adenine phosphoribosyltransferase activity	molecular_function	GO:0003999	PRTase-like
TraesCS2B02G377500	transferase activity	molecular_function	GO:0016740	PRibTrfase_dom
TraesCS2B02G377500	transferase activity	molecular_function	GO:0016740	Ade_phspho_trans
TraesCS2B02G377500	transferase activity	molecular_function	GO:0016740	PRTase-like
TraesCS2B02G377500	transferase activity, transferring glycosyl groups	molecular_function	GO:0016757	PRibTrfase_dom
TraesCS2B02G377500	transferase activity, transferring glycosyl groups	molecular_function	GO:0016757	Ade_phspho_trans
TraesCS2B02G377500	transferase activity, transferring glycosyl groups	molecular_function	GO:0016757	PRTase-like
TraesCS2B02G493800	protein binding	molecular_function	GO:0005515	BTB/POZ_dom
TraesCS2B02G493800	protein binding	molecular_function	GO:0005515	SKP1/BTB/POZ_sf
TraesCS2B02G493800	protein binding	molecular_function	GO:0005515	BPM_C
TraesCS2B02G535900	protein binding	molecular_function	GO:0005515	F-box_dom
TraesCS2B02G535900	protein binding	molecular_function	GO:0005515	F-box-like_dom_sf
TraesCS2B02G573300	heme binding	molecular_function	GO:0020037	Cyt_P450
TraesCS2B02G573300	heme binding	molecular_function	GO:0020037	Cyt_P450_E_grp-I
TraesCS2B02G573300	heme binding	molecular_function	GO:0020037	Cyt_P450_CS
TraesCS2B02G573300	heme binding	molecular_function	GO:0020037	Cyt_P450_sf
TraesCS2B02G573300	iron ion binding	molecular_function	GO:0005506	Cyt_P450
TraesCS2B02G573300	iron ion binding	molecular_function	GO:0005506	Cyt_P450_E_grp-I
TraesCS2B02G573300	iron ion binding	molecular_function	GO:0005506	Cyt_P450_CS
TraesCS2B02G573300	iron ion binding	molecular_function	GO:0005506	Cyt_P450_sf
TraesCS2B02G573300	oxidoreductase activity, acting on paired donors, with incorporation or reduction of molecular oxygen	molecular_function	GO:0016705	Cyt_P450
TraesCS2B02G573300	oxidoreductase activity, acting on paired donors, with incorporation or reduction of molecular oxygen	molecular_function	GO:0016705	Cyt_P450_E_grp-I
TraesCS2B02G573300	oxidoreductase activity, acting on paired donors, with incorporation or reduction of molecular oxygen	molecular_function	GO:0016705	Cyt_P450_CS
TraesCS2B02G573300	oxidoreductase activity, acting on paired donors, with incorporation or reduction of molecular oxygen	molecular_function	GO:0016705	Cyt_P450_sf
TraesCS2B02G595000	hydrolase activity, hydrolyzing O-glycosyl compounds	molecular_function	GO:0004553	Glyco_hydro_32
TraesCS2B02G595000	hydrolase activity, hydrolyzing O-glycosyl compounds	molecular_function	GO:0004553	Glyco_hydro_32_N
TraesCS2B02G595000	hydrolase activity, hydrolyzing O-glycosyl compounds	molecular_function	GO:0004553	Glyco_hydro_32_C
TraesCS2B02G595000	hydrolase activity, hydrolyzing O-glycosyl compounds	molecular_function	GO:0004553	ConA-like_dom_sf
TraesCS2B02G595000	hydrolase activity, hydrolyzing O-glycosyl compounds	molecular_function	GO:0004553	Glyco_hydro_beta-prop_sf
TraesCS2D02G016100	transferase activity, transferring acyl groups other than amino-acyl groups	molecular_function	GO:0016747	Chalcone/stilbene_synthase_N
TraesCS2D02G016100	transferase activity, transferring acyl groups other than amino-acyl groups	molecular_function	GO:0016747	Polyketide_synthase_type-III
TraesCS2D02G016100	transferase activity, transferring acyl groups other than amino-acyl groups	molecular_function	GO:0016747	Chalcone/stilbene_synth_C
TraesCS2D02G016100	transferase activity, transferring acyl groups other than amino-acyl groups	molecular_function	GO:0016747	Thiolase-like
TraesCS2D02G016100	catalytic activity	molecular_function	GO:0003824	Chalcone/stilbene_synthase_N
TraesCS2D02G016100	catalytic activity	molecular_function	GO:0003824	Polyketide_synthase_type-III
TraesCS2D02G016100	catalytic activity	molecular_function	GO:0003824	Chalcone/stilbene_synth_C
TraesCS2D02G016100	catalytic activity	molecular_function	GO:0003824	Thiolase-like
TraesCS2D02G016100	transferase activity	molecular_function	GO:0016740	Chalcone/stilbene_synthase_N
TraesCS2D02G016100	transferase activity	molecular_function	GO:0016740	Polyketide_synthase_type-III
TraesCS2D02G016100	transferase activity	molecular_function	GO:0016740	Chalcone/stilbene_synth_C
TraesCS2D02G016100	transferase activity	molecular_function	GO:0016740	Thiolase-like
TraesCS2D02G016100	transferase activity, transferring acyl groups	molecular_function	GO:0016746	Chalcone/stilbene_synthase_N
TraesCS2D02G016100	transferase activity, transferring acyl groups	molecular_function	GO:0016746	Polyketide_synthase_type-III
TraesCS2D02G016100	transferase activity, transferring acyl groups	molecular_function	GO:0016746	Chalcone/stilbene_synth_C
TraesCS2D02G016100	transferase activity, transferring acyl groups	molecular_function	GO:0016746	Thiolase-like
TraesCS2D02G045700	transmembrane transporter activity	molecular_function	GO:0022857	MFS_sugar_transport-like
TraesCS2D02G045700	transmembrane transporter activity	molecular_function	GO:0022857	MFS_dom
TraesCS2D02G045700	transmembrane transporter activity	molecular_function	GO:0022857	MFS_trans_sf
TraesCS2D02G045700	ATPase-coupled phosphate ion transmembrane transporter activity	molecular_function	GO:0015415	MFS_sugar_transport-like
TraesCS2D02G045700	ATPase-coupled phosphate ion transmembrane transporter activity	molecular_function	GO:0015415	MFS_dom
TraesCS2D02G045700	ATPase-coupled phosphate ion transmembrane transporter activity	molecular_function	GO:0015415	MFS_trans_sf
TraesCS2D02G045700	hydrolase activity	molecular_function	GO:0016787	MFS_sugar_transport-like
TraesCS2D02G045700	hydrolase activity	molecular_function	GO:0016787	MFS_dom
TraesCS2D02G045700	hydrolase activity	molecular_function	GO:0016787	MFS_trans_sf
TraesCS2D02G277300	ubiquitin-protein transferase activity	molecular_function	GO:0004842	Ubox_domain
TraesCS2D02G277300	ubiquitin-protein transferase activity	molecular_function	GO:0004842	ARM-like
TraesCS2D02G277300	ubiquitin-protein transferase activity	molecular_function	GO:0004842	Znf_RING/FYVE/PHD
TraesCS2D02G277300	ubiquitin-protein transferase activity	molecular_function	GO:0004842	ARM-type_fold
TraesCS2D02G419700	ATP binding	molecular_function	GO:0005524	Prot_kinase_dom
TraesCS2D02G419700	ATP binding	molecular_function	GO:0005524	Thaumatin
TraesCS2D02G419700	ATP binding	molecular_function	GO:0005524	Ser/Thr_kinase_AS
TraesCS2D02G419700	ATP binding	molecular_function	GO:0005524	Kinase-like_dom_sf
TraesCS2D02G419700	ATP binding	molecular_function	GO:0005524	Protein_kinase_ATP_BS
TraesCS2D02G419700	ATP binding	molecular_function	GO:0005524	Thaumatin_CS
TraesCS2D02G419700	ATP binding	molecular_function	GO:0005524	Osmotin/thaumatin-like_sf
TraesCS2D02G419700	protein kinase activity	molecular_function	GO:0004672	Prot_kinase_dom
TraesCS2D02G419700	protein kinase activity	molecular_function	GO:0004672	Thaumatin
TraesCS2D02G419700	protein kinase activity	molecular_function	GO:0004672	Ser/Thr_kinase_AS
TraesCS2D02G419700	protein kinase activity	molecular_function	GO:0004672	Kinase-like_dom_sf
TraesCS2D02G419700	protein kinase activity	molecular_function	GO:0004672	Protein_kinase_ATP_BS
TraesCS2D02G419700	protein kinase activity	molecular_function	GO:0004672	Thaumatin_CS
TraesCS2D02G419700	protein kinase activity	molecular_function	GO:0004672	Osmotin/thaumatin-like_sf
TraesCS2D02G508500	protein binding	molecular_function	GO:0005515	F-box_dom
TraesCS2D02G508500	protein binding	molecular_function	GO:0005515	F-box-assoc_interact_dom
TraesCS2D02G508500	protein binding	molecular_function	GO:0005515	F-box-like_dom_sf
TraesCS3A02G002500	nucleic acid binding	molecular_function	GO:0003676	Znf_C2H2_type
TraesCS3A02G002500	nucleic acid binding	molecular_function	GO:0003676	Znf_C2H2_sf
TraesCS3A02G005500	calmodulin binding	molecular_function	GO:0005516	Mlo
TraesCS3A02G017100	ATP binding	molecular_function	GO:0005524	Prot_kinase_dom
TraesCS3A02G017100	ATP binding	molecular_function	GO:0005524	Ser/Thr_kinase_AS
TraesCS3A02G017100	ATP binding	molecular_function	GO:0005524	Kinase-like_dom_sf
TraesCS3A02G017100	ATP binding	molecular_function	GO:0005524	Protein_kinase_ATP_BS
TraesCS3A02G017100	ATP binding	molecular_function	GO:0005524	WAK_GUB
TraesCS3A02G017100	protein kinase activity	molecular_function	GO:0004672	Prot_kinase_dom
TraesCS3A02G017100	protein kinase activity	molecular_function	GO:0004672	Ser/Thr_kinase_AS
TraesCS3A02G017100	protein kinase activity	molecular_function	GO:0004672	Kinase-like_dom_sf
TraesCS3A02G017100	protein kinase activity	molecular_function	GO:0004672	Protein_kinase_ATP_BS
TraesCS3A02G017100	protein kinase activity	molecular_function	GO:0004672	WAK_GUB
TraesCS3A02G017100	polysaccharide binding	molecular_function	GO:0030247	Prot_kinase_dom
TraesCS3A02G017100	polysaccharide binding	molecular_function	GO:0030247	Ser/Thr_kinase_AS
TraesCS3A02G017100	polysaccharide binding	molecular_function	GO:0030247	Kinase-like_dom_sf
TraesCS3A02G017100	polysaccharide binding	molecular_function	GO:0030247	Protein_kinase_ATP_BS
TraesCS3A02G017100	polysaccharide binding	molecular_function	GO:0030247	WAK_GUB
TraesCS3A02G133300	metal ion binding	molecular_function	GO:0046872	Gcp-like_dom
TraesCS3A02G133300	metal ion binding	molecular_function	GO:0046872	KAE1/TsaD
TraesCS3A02G133300	metal ion binding	molecular_function	GO:0046872	TsaD
TraesCS3A02G133300	metalloendopeptidase activity	molecular_function	GO:0004222	Gcp-like_dom
TraesCS3A02G133300	metalloendopeptidase activity	molecular_function	GO:0004222	KAE1/TsaD
TraesCS3A02G133300	metalloendopeptidase activity	molecular_function	GO:0004222	TsaD
TraesCS3A02G133300	N(6)-L-threonylcarbamoyladenine synthase activity	molecular_function	GO:0061711	Gcp-like_dom
TraesCS3A02G133300	N(6)-L-threonylcarbamoyladenine synthase activity	molecular_function	GO:0061711	KAE1/TsaD
TraesCS3A02G133300	N(6)-L-threonylcarbamoyladenine synthase activity	molecular_function	GO:0061711	TsaD
TraesCS3A02G227100	ATP binding	molecular_function	GO:0005524	Prot_kinase_dom
TraesCS3A02G227100	ATP binding	molecular_function	GO:0005524	Ser/Thr_kinase_AS
TraesCS3A02G227100	ATP binding	molecular_function	GO:0005524	Kinase-like_dom_sf
TraesCS3A02G227100	ATP binding	molecular_function	GO:0005524	Protein_kinase_ATP_BS
TraesCS3A02G227100	protein kinase activity	molecular_function	GO:0004672	Prot_kinase_dom
TraesCS3A02G227100	protein kinase activity	molecular_function	GO:0004672	Ser/Thr_kinase_AS
TraesCS3A02G227100	protein kinase activity	molecular_function	GO:0004672	Kinase-like_dom_sf
TraesCS3A02G227100	protein kinase activity	molecular_function	GO:0004672	Protein_kinase_ATP_BS
TraesCS3A02G298200	strictosidine synthase activity	molecular_function	GO:0016844	6-blade_b-propeller_TolB-like
TraesCS3A02G298200	strictosidine synthase activity	molecular_function	GO:0016844	Strictosidine_synth_cons-reg
TraesCS3A02G494700	oxidoreductase activity	molecular_function	GO:0016491	Oxid_FAD_bind_N
TraesCS3A02G494700	oxidoreductase activity	molecular_function	GO:0016491	ALO
TraesCS3A02G494700	oxidoreductase activity	molecular_function	GO:0016491	GULO_Plant
TraesCS3A02G494700	oxidoreductase activity	molecular_function	GO:0016491	FAD-bd_PCMH
TraesCS3A02G494700	oxidoreductase activity	molecular_function	GO:0016491	FAD-bd_PCMH_sub2
TraesCS3A02G494700	oxidoreductase activity	molecular_function	GO:0016491	FAD-bd_PCMH-like_sf
TraesCS3A02G494700	FAD binding	molecular_function	GO:0071949	Oxid_FAD_bind_N
TraesCS3A02G494700	FAD binding	molecular_function	GO:0071949	ALO
TraesCS3A02G494700	FAD binding	molecular_function	GO:0071949	GULO_Plant
TraesCS3A02G494700	FAD binding	molecular_function	GO:0071949	FAD-bd_PCMH
TraesCS3A02G494700	FAD binding	molecular_function	GO:0071949	FAD-bd_PCMH_sub2
TraesCS3A02G494700	FAD binding	molecular_function	GO:0071949	FAD-bd_PCMH-like_sf
TraesCS3A02G494700	D-arabinono-1,4-lactone oxidase activity	molecular_function	GO:0003885	Oxid_FAD_bind_N
TraesCS3A02G494700	D-arabinono-1,4-lactone oxidase activity	molecular_function	GO:0003885	ALO
TraesCS3A02G494700	D-arabinono-1,4-lactone oxidase activity	molecular_function	GO:0003885	GULO_Plant
TraesCS3A02G494700	D-arabinono-1,4-lactone oxidase activity	molecular_function	GO:0003885	FAD-bd_PCMH
TraesCS3A02G494700	D-arabinono-1,4-lactone oxidase activity	molecular_function	GO:0003885	FAD-bd_PCMH_sub2
TraesCS3A02G494700	D-arabinono-1,4-lactone oxidase activity	molecular_function	GO:0003885	FAD-bd_PCMH-like_sf
TraesCS3A02G494700	flavin adenine dinucleotide binding	molecular_function	GO:0050660	Oxid_FAD_bind_N
TraesCS3A02G494700	flavin adenine dinucleotide binding	molecular_function	GO:0050660	ALO
TraesCS3A02G494700	flavin adenine dinucleotide binding	molecular_function	GO:0050660	GULO_Plant
TraesCS3A02G494700	flavin adenine dinucleotide binding	molecular_function	GO:0050660	FAD-bd_PCMH
TraesCS3A02G494700	flavin adenine dinucleotide binding	molecular_function	GO:0050660	FAD-bd_PCMH_sub2
TraesCS3A02G494700	flavin adenine dinucleotide binding	molecular_function	GO:0050660	FAD-bd_PCMH-like_sf
TraesCS3A02G499200	antiporter activity	molecular_function	GO:0015297	MATE_fam
TraesCS3A02G499200	xenobiotic transmembrane transporter activity	molecular_function	GO:0042910	MATE_fam
TraesCS3A02G509100	peroxidase activity	molecular_function	GO:0004601	Peroxidase_pln
TraesCS3A02G509100	peroxidase activity	molecular_function	GO:0004601	Haem_peroxidase
TraesCS3A02G509100	peroxidase activity	molecular_function	GO:0004601	Haem_peroxidase_sf
TraesCS3A02G509100	peroxidase activity	molecular_function	GO:0004601	Peroxidases_AS
TraesCS3A02G509100	peroxidase activity	molecular_function	GO:0004601	Secretory_peroxidase
TraesCS3A02G509100	heme binding	molecular_function	GO:0020037	Peroxidase_pln
TraesCS3A02G509100	heme binding	molecular_function	GO:0020037	Haem_peroxidase
TraesCS3A02G509100	heme binding	molecular_function	GO:0020037	Haem_peroxidase_sf
TraesCS3A02G509100	heme binding	molecular_function	GO:0020037	Peroxidases_AS
TraesCS3A02G509100	heme binding	molecular_function	GO:0020037	Secretory_peroxidase
TraesCS3B02G025900	DNA binding	molecular_function	GO:0003677	Histone_H3/CENP-A
TraesCS3B02G025900	DNA binding	molecular_function	GO:0003677	Histone_H2A/H2B/H3
TraesCS3B02G025900	DNA binding	molecular_function	GO:0003677	Histone-fold
TraesCS3B02G025900	protein heterodimerization activity	molecular_function	GO:0046982	Histone_H3/CENP-A
TraesCS3B02G025900	protein heterodimerization activity	molecular_function	GO:0046982	Histone_H2A/H2B/H3
TraesCS3B02G025900	protein heterodimerization activity	molecular_function	GO:0046982	Histone-fold
TraesCS3B02G140600	aspartic-type endopeptidase activity	molecular_function	GO:0004190	Aspartic_peptidase_A1
TraesCS3B02G140600	aspartic-type endopeptidase activity	molecular_function	GO:0004190	Aspartic_peptidase_AS
TraesCS3B02G140600	aspartic-type endopeptidase activity	molecular_function	GO:0004190	Peptidase_aspartic_dom_sf
TraesCS3B02G140600	aspartic-type endopeptidase activity	molecular_function	GO:0004190	TAXi_C
TraesCS3B02G140600	aspartic-type endopeptidase activity	molecular_function	GO:0004190	TAXi_N
TraesCS3B02G140600	aspartic-type endopeptidase activity	molecular_function	GO:0004190	PEPTIDASE_A1
TraesCS3B02G140600	aspartic-type endopeptidase activity	molecular_function	GO:0004190	Pepsin-like_plant
TraesCS3B02G158800	DNA-binding transcription factor activity	molecular_function	GO:0003700	AP2/ERF_dom
TraesCS3B02G158800	DNA-binding transcription factor activity	molecular_function	GO:0003700	DNA-bd_dom_sf
TraesCS3B02G158800	DNA-binding transcription factor activity	molecular_function	GO:0003700	AP2/ERF_dom_sf
TraesCS3B02G158800	DNA binding	molecular_function	GO:0003677	AP2/ERF_dom
TraesCS3B02G158800	DNA binding	molecular_function	GO:0003677	DNA-bd_dom_sf
TraesCS3B02G158800	DNA binding	molecular_function	GO:0003677	AP2/ERF_dom_sf
TraesCS3B02G269700	serine-type peptidase activity	molecular_function	GO:0008236	Peptidase_S41A
TraesCS3B02G269700	serine-type peptidase activity	molecular_function	GO:0008236	Tail-specific_protease
TraesCS3B02G269700	serine-type peptidase activity	molecular_function	GO:0008236	ClpP/crotonase-like_dom_sf
TraesCS3B02G269700	serine-type peptidase activity	molecular_function	GO:0008236	PDZ
TraesCS3B02G269700	serine-type peptidase activity	molecular_function	GO:0008236	PDZ_sf
TraesCS3B02G269700	serine-type peptidase activity	molecular_function	GO:0008236	PDZ_6
TraesCS3B02G269700	protein binding	molecular_function	GO:0005515	PDZ
TraesCS3B02G269700	protein binding	molecular_function	GO:0005515	Peptidase_S41A
TraesCS3B02G269700	protein binding	molecular_function	GO:0005515	Tail-specific_protease
TraesCS3B02G269700	protein binding	molecular_function	GO:0005515	ClpP/crotonase-like_dom_sf
TraesCS3B02G269700	protein binding	molecular_function	GO:0005515	PDZ_sf
TraesCS3B02G269700	protein binding	molecular_function	GO:0005515	PDZ_6
TraesCS3B02G278300	methyltransferase activity	molecular_function	GO:0008168	Methyltransf_11
TraesCS3B02G278300	methyltransferase activity	molecular_function	GO:0008168	SAM-dependent_MTases
TraesCS3B02G474500	ATP binding	molecular_function	GO:0005524	Prot_kinase_dom
TraesCS3B02G474500	ATP binding	molecular_function	GO:0005524	EGF-like_dom
TraesCS3B02G474500	ATP binding	molecular_function	GO:0005524	EGF-like_Ca-bd_dom
TraesCS3B02G474500	ATP binding	molecular_function	GO:0005524	Ser/Thr_kinase_AS
TraesCS3B02G474500	ATP binding	molecular_function	GO:0005524	Growth_fac_rcpt_cys_sf
TraesCS3B02G474500	ATP binding	molecular_function	GO:0005524	Kinase-like_dom_sf
TraesCS3B02G474500	ATP binding	molecular_function	GO:0005524	Protein_kinase_ATP_BS
TraesCS3B02G474500	ATP binding	molecular_function	GO:0005524	EGF_Ca-bd_CS
TraesCS3B02G474500	ATP binding	molecular_function	GO:0005524	WAK_GUB
TraesCS3B02G474500	protein kinase activity	molecular_function	GO:0004672	Prot_kinase_dom
TraesCS3B02G474500	protein kinase activity	molecular_function	GO:0004672	EGF-like_dom
TraesCS3B02G474500	protein kinase activity	molecular_function	GO:0004672	EGF-like_Ca-bd_dom
TraesCS3B02G474500	protein kinase activity	molecular_function	GO:0004672	Ser/Thr_kinase_AS
TraesCS3B02G474500	protein kinase activity	molecular_function	GO:0004672	Growth_fac_rcpt_cys_sf
TraesCS3B02G474500	protein kinase activity	molecular_function	GO:0004672	Kinase-like_dom_sf
TraesCS3B02G474500	protein kinase activity	molecular_function	GO:0004672	Protein_kinase_ATP_BS
TraesCS3B02G474500	protein kinase activity	molecular_function	GO:0004672	EGF_Ca-bd_CS
TraesCS3B02G474500	protein kinase activity	molecular_function	GO:0004672	WAK_GUB
TraesCS3B02G474500	calcium ion binding	molecular_function	GO:0005509	Prot_kinase_dom
TraesCS3B02G474500	calcium ion binding	molecular_function	GO:0005509	EGF-like_dom
TraesCS3B02G474500	calcium ion binding	molecular_function	GO:0005509	EGF-like_Ca-bd_dom
TraesCS3B02G474500	calcium ion binding	molecular_function	GO:0005509	Ser/Thr_kinase_AS
TraesCS3B02G474500	calcium ion binding	molecular_function	GO:0005509	Growth_fac_rcpt_cys_sf
TraesCS3B02G474500	calcium ion binding	molecular_function	GO:0005509	Kinase-like_dom_sf
TraesCS3B02G474500	calcium ion binding	molecular_function	GO:0005509	Protein_kinase_ATP_BS
TraesCS3B02G474500	calcium ion binding	molecular_function	GO:0005509	EGF_Ca-bd_CS
TraesCS3B02G474500	calcium ion binding	molecular_function	GO:0005509	WAK_GUB
TraesCS3B02G474500	polysaccharide binding	molecular_function	GO:0030247	Prot_kinase_dom
TraesCS3B02G474500	polysaccharide binding	molecular_function	GO:0030247	EGF-like_dom
TraesCS3B02G474500	polysaccharide binding	molecular_function	GO:0030247	EGF-like_Ca-bd_dom
TraesCS3B02G474500	polysaccharide binding	molecular_function	GO:0030247	Ser/Thr_kinase_AS
TraesCS3B02G474500	polysaccharide binding	molecular_function	GO:0030247	Growth_fac_rcpt_cys_sf
TraesCS3B02G474500	polysaccharide binding	molecular_function	GO:0030247	Kinase-like_dom_sf
TraesCS3B02G474500	polysaccharide binding	molecular_function	GO:0030247	Protein_kinase_ATP_BS
TraesCS3B02G474500	polysaccharide binding	molecular_function	GO:0030247	EGF_Ca-bd_CS
TraesCS3B02G474500	polysaccharide binding	molecular_function	GO:0030247	WAK_GUB
TraesCS3B02G531000	cysteine-type peptidase activity	molecular_function	GO:0008234	Peptidase_C48_C
TraesCS3B02G531000	cysteine-type peptidase activity	molecular_function	GO:0008234	Papain-like_cys_pep_sf
TraesCS3B02G573300	ADP binding	molecular_function	GO:0043531	NB-ARC
TraesCS3B02G573300	ADP binding	molecular_function	GO:0043531	P-loop_NTPase
TraesCS3B02G573300	ADP binding	molecular_function	GO:0043531	RX-like_CC
TraesCS3B02G573300	ADP binding	molecular_function	GO:0043531	Rx_N
TraesCS3B02G573300	ATP binding	molecular_function	GO:0005524	NB-ARC
TraesCS3B02G573300	ATP binding	molecular_function	GO:0005524	P-loop_NTPase
TraesCS3B02G573300	ATP binding	molecular_function	GO:0005524	RX-like_CC
TraesCS3B02G573300	ATP binding	molecular_function	GO:0005524	Rx_N
TraesCS3B02G573300	nucleotide binding	molecular_function	GO:0000166	NB-ARC
TraesCS3B02G573300	nucleotide binding	molecular_function	GO:0000166	P-loop_NTPase
TraesCS3B02G573300	nucleotide binding	molecular_function	GO:0000166	RX-like_CC
TraesCS3B02G573300	nucleotide binding	molecular_function	GO:0000166	Rx_N
TraesCS3D02G004800	enzyme inhibitor activity	molecular_function	GO:0004857	Pectinesterase_inhib_dom
TraesCS3D02G004800	enzyme inhibitor activity	molecular_function	GO:0004857	PMEI_plant
TraesCS3D02G004800	enzyme inhibitor activity	molecular_function	GO:0004857	Invertase/methylesterase_inhib
TraesCS3D02G004800	pectinesterase inhibitor activity	molecular_function	GO:0046910	Pectinesterase_inhib_dom
TraesCS3D02G004800	pectinesterase inhibitor activity	molecular_function	GO:0046910	PMEI_plant
TraesCS3D02G004800	pectinesterase inhibitor activity	molecular_function	GO:0046910	Invertase/methylesterase_inhib
TraesCS3D02G004900	enzyme inhibitor activity	molecular_function	GO:0004857	Pectinesterase_inhib_dom
TraesCS3D02G004900	enzyme inhibitor activity	molecular_function	GO:0004857	Invertase/methylesterase_inhib
TraesCS3D02G230400	nucleic acid binding	molecular_function	GO:0003676	RNA-helicase_DEAD-box_CS
TraesCS3D02G230400	nucleic acid binding	molecular_function	GO:0003676	Helicase_C
TraesCS3D02G230400	nucleic acid binding	molecular_function	GO:0003676	DEAD/DEAH_box_helicase_dom
TraesCS3D02G230400	nucleic acid binding	molecular_function	GO:0003676	Helicase_ATP-bd
TraesCS3D02G230400	nucleic acid binding	molecular_function	GO:0003676	RNA_helicase_DEAD_Q_motif
TraesCS3D02G230400	nucleic acid binding	molecular_function	GO:0003676	P-loop_NTPase
TraesCS3D02G230400	ATP binding	molecular_function	GO:0005524	RNA-helicase_DEAD-box_CS
TraesCS3D02G230400	ATP binding	molecular_function	GO:0005524	Helicase_C
TraesCS3D02G230400	ATP binding	molecular_function	GO:0005524	DEAD/DEAH_box_helicase_dom
TraesCS3D02G230400	ATP binding	molecular_function	GO:0005524	Helicase_ATP-bd
TraesCS3D02G230400	ATP binding	molecular_function	GO:0005524	RNA_helicase_DEAD_Q_motif
TraesCS3D02G230400	ATP binding	molecular_function	GO:0005524	P-loop_NTPase
TraesCS3D02G230400	helicase activity	molecular_function	GO:0004386	RNA-helicase_DEAD-box_CS
TraesCS3D02G230400	helicase activity	molecular_function	GO:0004386	Helicase_C
TraesCS3D02G230400	helicase activity	molecular_function	GO:0004386	DEAD/DEAH_box_helicase_dom
TraesCS3D02G230400	helicase activity	molecular_function	GO:0004386	Helicase_ATP-bd
TraesCS3D02G230400	helicase activity	molecular_function	GO:0004386	RNA_helicase_DEAD_Q_motif
TraesCS3D02G230400	helicase activity	molecular_function	GO:0004386	P-loop_NTPase
TraesCS3D02G330800	hydrolase activity, hydrolyzing O-glycosyl compounds	molecular_function	GO:0004553	Glyco_hydro_1
TraesCS3D02G330800	hydrolase activity, hydrolyzing O-glycosyl compounds	molecular_function	GO:0004553	Glycoside_hydrolase_SF
TraesCS3D02G330800	hydrolase activity, hydrolyzing O-glycosyl compounds	molecular_function	GO:0004553	Glyco_hydro_1_N_CS
TraesCS3D02G497500	DNA binding	molecular_function	GO:0003677	HMG_box_dom
TraesCS3D02G497500	DNA binding	molecular_function	GO:0003677	HMG_box_dom_sf
TraesCS4A02G036200	catalytic activity	molecular_function	GO:0003824	AMP-dep_Synth/Lig
TraesCS4A02G036200	catalytic activity	molecular_function	GO:0003824	AMP-binding_CS
TraesCS4A02G036200	catalytic activity	molecular_function	GO:0003824	AMP-bd_C
TraesCS4A02G036200	catalytic activity	molecular_function	GO:0003824	AMP-dep_Synthh-like_sf
TraesCS4A02G036200	fatty-acyl-CoA synthase activity	molecular_function	GO:0004321	AMP-dep_Synth/Lig
TraesCS4A02G036200	fatty-acyl-CoA synthase activity	molecular_function	GO:0004321	AMP-binding_CS
TraesCS4A02G036200	fatty-acyl-CoA synthase activity	molecular_function	GO:0004321	AMP-bd_C
TraesCS4A02G036200	fatty-acyl-CoA synthase activity	molecular_function	GO:0004321	AMP-dep_Synthh-like_sf
TraesCS4A02G179600	serine-type endopeptidase activity	molecular_function	GO:0004252	Peptidase_S54_rhomboid
TraesCS4A02G179600	serine-type endopeptidase activity	molecular_function	GO:0004252	Peptidase_S54_rhomboid_dom
TraesCS4A02G179600	serine-type endopeptidase activity	molecular_function	GO:0004252	Rhomboid-like_sf
TraesCS4A02G394600	transferase activity, transferring acyl groups other than amino-acyl groups	molecular_function	GO:0016747	Transferase
TraesCS4A02G394600	transferase activity, transferring acyl groups other than amino-acyl groups	molecular_function	GO:0016747	CAT-like_dom_sf
TraesCS4A02G448100	ATP binding	molecular_function	GO:0005524	EGF-type_Asp/Asn_hydroxyl_site
TraesCS4A02G448100	ATP binding	molecular_function	GO:0005524	Prot_kinase_dom
TraesCS4A02G448100	ATP binding	molecular_function	GO:0005524	EGF-like_dom
TraesCS4A02G448100	ATP binding	molecular_function	GO:0005524	Ser-Thr/Tyr_kinase_cat_dom
TraesCS4A02G448100	ATP binding	molecular_function	GO:0005524	EGF-like_Ca-bd_dom
TraesCS4A02G448100	ATP binding	molecular_function	GO:0005524	Ser/Thr_kinase_AS
TraesCS4A02G448100	ATP binding	molecular_function	GO:0005524	Growth_fac_rcpt_cys_sf
TraesCS4A02G448100	ATP binding	molecular_function	GO:0005524	Kinase-like_dom_sf
TraesCS4A02G448100	ATP binding	molecular_function	GO:0005524	Protein_kinase_ATP_BS
TraesCS4A02G448100	ATP binding	molecular_function	GO:0005524	EGF_Ca-bd_CS
TraesCS4A02G448100	ATP binding	molecular_function	GO:0005524	WAK_GUB
TraesCS4A02G448100	protein kinase activity	molecular_function	GO:0004672	EGF-type_Asp/Asn_hydroxyl_site
TraesCS4A02G448100	protein kinase activity	molecular_function	GO:0004672	Prot_kinase_dom
TraesCS4A02G448100	protein kinase activity	molecular_function	GO:0004672	EGF-like_dom
TraesCS4A02G448100	protein kinase activity	molecular_function	GO:0004672	Ser-Thr/Tyr_kinase_cat_dom
TraesCS4A02G448100	protein kinase activity	molecular_function	GO:0004672	EGF-like_Ca-bd_dom
TraesCS4A02G448100	protein kinase activity	molecular_function	GO:0004672	Ser/Thr_kinase_AS
TraesCS4A02G448100	protein kinase activity	molecular_function	GO:0004672	Growth_fac_rcpt_cys_sf
TraesCS4A02G448100	protein kinase activity	molecular_function	GO:0004672	Kinase-like_dom_sf
TraesCS4A02G448100	protein kinase activity	molecular_function	GO:0004672	Protein_kinase_ATP_BS
TraesCS4A02G448100	protein kinase activity	molecular_function	GO:0004672	EGF_Ca-bd_CS
TraesCS4A02G448100	protein kinase activity	molecular_function	GO:0004672	WAK_GUB
TraesCS4A02G448100	calcium ion binding	molecular_function	GO:0005509	EGF-type_Asp/Asn_hydroxyl_site
TraesCS4A02G448100	calcium ion binding	molecular_function	GO:0005509	Prot_kinase_dom
TraesCS4A02G448100	calcium ion binding	molecular_function	GO:0005509	EGF-like_dom
TraesCS4A02G448100	calcium ion binding	molecular_function	GO:0005509	Ser-Thr/Tyr_kinase_cat_dom
TraesCS4A02G448100	calcium ion binding	molecular_function	GO:0005509	EGF-like_Ca-bd_dom
TraesCS4A02G448100	calcium ion binding	molecular_function	GO:0005509	Ser/Thr_kinase_AS
TraesCS4A02G448100	calcium ion binding	molecular_function	GO:0005509	Growth_fac_rcpt_cys_sf
TraesCS4A02G448100	calcium ion binding	molecular_function	GO:0005509	Kinase-like_dom_sf
TraesCS4A02G448100	calcium ion binding	molecular_function	GO:0005509	Protein_kinase_ATP_BS
TraesCS4A02G448100	calcium ion binding	molecular_function	GO:0005509	EGF_Ca-bd_CS
TraesCS4A02G448100	calcium ion binding	molecular_function	GO:0005509	WAK_GUB
TraesCS4A02G448100	polysaccharide binding	molecular_function	GO:0030247	EGF-type_Asp/Asn_hydroxyl_site
TraesCS4A02G448100	polysaccharide binding	molecular_function	GO:0030247	Prot_kinase_dom
TraesCS4A02G448100	polysaccharide binding	molecular_function	GO:0030247	EGF-like_dom
TraesCS4A02G448100	polysaccharide binding	molecular_function	GO:0030247	Ser-Thr/Tyr_kinase_cat_dom
TraesCS4A02G448100	polysaccharide binding	molecular_function	GO:0030247	EGF-like_Ca-bd_dom
TraesCS4A02G448100	polysaccharide binding	molecular_function	GO:0030247	Ser/Thr_kinase_AS
TraesCS4A02G448100	polysaccharide binding	molecular_function	GO:0030247	Growth_fac_rcpt_cys_sf
TraesCS4A02G448100	polysaccharide binding	molecular_function	GO:0030247	Kinase-like_dom_sf
TraesCS4A02G448100	polysaccharide binding	molecular_function	GO:0030247	Protein_kinase_ATP_BS
TraesCS4A02G448100	polysaccharide binding	molecular_function	GO:0030247	EGF_Ca-bd_CS
TraesCS4A02G448100	polysaccharide binding	molecular_function	GO:0030247	WAK_GUB
TraesCS4A02G491100	electron transfer activity	molecular_function	GO:0009055	Glutaredoxin
TraesCS4A02G491100	electron transfer activity	molecular_function	GO:0009055	Kelch_1
TraesCS4A02G491100	electron transfer activity	molecular_function	GO:0009055	Kelch-typ_b-propeller
TraesCS4A02G491100	electron transfer activity	molecular_function	GO:0009055	Thioredoxin-like_sf
TraesCS4A02G491100	protein disulfide oxidoreductase activity	molecular_function	GO:0015035	Glutaredoxin
TraesCS4A02G491100	protein disulfide oxidoreductase activity	molecular_function	GO:0015035	Kelch_1
TraesCS4A02G491100	protein disulfide oxidoreductase activity	molecular_function	GO:0015035	Kelch-typ_b-propeller
TraesCS4A02G491100	protein disulfide oxidoreductase activity	molecular_function	GO:0015035	Thioredoxin-like_sf
TraesCS4A02G491100	protein binding	molecular_function	GO:0005515	Glutaredoxin
TraesCS4A02G491100	protein binding	molecular_function	GO:0005515	Kelch_1
TraesCS4A02G491100	protein binding	molecular_function	GO:0005515	Kelch-typ_b-propeller
TraesCS4A02G491100	protein binding	molecular_function	GO:0005515	Thioredoxin-like_sf
TraesCS4B02G070800	ubiquitin-protein transferase activity	molecular_function	GO:0004842	Znf_RING
TraesCS4B02G070800	ubiquitin-protein transferase activity	molecular_function	GO:0004842	IBR_dom
TraesCS4B02G070800	ubiquitin-protein transferase activity	molecular_function	GO:0004842	Znf_RING/FYVE/PHD
TraesCS4B02G070800	ubiquitin-protein transferase activity	molecular_function	GO:0004842	Ariadne-2
TraesCS4B02G070800	ubiquitin-protein transferase activity	molecular_function	GO:0004842	E3_UB_ligase_RBR
TraesCS4B02G170000	calcium ion binding	molecular_function	GO:0005509	EGF-like_Ca-bd_dom
TraesCS4B02G170000	calcium ion binding	molecular_function	GO:0005509	PA_domain
TraesCS4B02G170000	calcium ion binding	molecular_function	GO:0005509	EGF_Ca-bd_CS
TraesCS4B02G170000	calcium ion binding	molecular_function	GO:0005509	Thioredoxin-like_sf
TraesCS4B02G179700	iron ion binding	molecular_function	GO:0005506	NIF_FeS_clus_asmbl_NifU_C
TraesCS4B02G179700	iron ion binding	molecular_function	GO:0005506	FSCA_dom_sf
TraesCS4B02G179700	iron-sulfur cluster binding	molecular_function	GO:0051536	NIF_FeS_clus_asmbl_NifU_C
TraesCS4B02G179700	iron-sulfur cluster binding	molecular_function	GO:0051536	FSCA_dom_sf
TraesCS4B02G370500	N,N-dimethylaniline monooxygenase activity	molecular_function	GO:0004499	Flavin_mOase
TraesCS4B02G370500	N,N-dimethylaniline monooxygenase activity	molecular_function	GO:0004499	Flavin_mOase-like
TraesCS4B02G370500	N,N-dimethylaniline monooxygenase activity	molecular_function	GO:0004499	FAD/NAD-bd_sf
TraesCS4B02G370500	flavin adenine dinucleotide binding	molecular_function	GO:0050660	Flavin_mOase
TraesCS4B02G370500	flavin adenine dinucleotide binding	molecular_function	GO:0050660	Flavin_mOase-like
TraesCS4B02G370500	flavin adenine dinucleotide binding	molecular_function	GO:0050660	FAD/NAD-bd_sf
TraesCS4B02G370500	NADP binding	molecular_function	GO:0050661	Flavin_mOase
TraesCS4B02G370500	NADP binding	molecular_function	GO:0050661	Flavin_mOase-like
TraesCS4B02G370500	NADP binding	molecular_function	GO:0050661	FAD/NAD-bd_sf
TraesCS4B02G390200	cysteine-type peptidase activity	molecular_function	GO:0008234	Pept_cys_AS
TraesCS4B02G390200	cysteine-type peptidase activity	molecular_function	GO:0008234	Peptidase_C1A_C
TraesCS4B02G390200	cysteine-type peptidase activity	molecular_function	GO:0008234	Prot_inhib_I29
TraesCS4B02G390200	cysteine-type peptidase activity	molecular_function	GO:0008234	Pept_asp_AS
TraesCS4B02G390200	cysteine-type peptidase activity	molecular_function	GO:0008234	Papain-like_cys_pep_sf
TraesCS4B02G390200	cysteine-type peptidase activity	molecular_function	GO:0008234	Peptidase_C1A_papain-like
TraesCS4D02G359700	pyridoxal phosphate binding	molecular_function	GO:0030170	PyrdxlP-dep_de-COase
TraesCS4D02G359700	pyridoxal phosphate binding	molecular_function	GO:0030170	Aromatic_deC
TraesCS4D02G359700	pyridoxal phosphate binding	molecular_function	GO:0030170	PyrdxlP-dep_Trfase_major
TraesCS4D02G359700	pyridoxal phosphate binding	molecular_function	GO:0030170	PyrdxlP-dep_Trfase_dom1
TraesCS4D02G359700	pyridoxal phosphate binding	molecular_function	GO:0030170	PyrdxlP-dep_Trfase
TraesCS4D02G359700	pyridoxal phosphate binding	molecular_function	GO:0030170	Pyridoxal-P_BS
TraesCS4D02G359700	catalytic activity	molecular_function	GO:0003824	PyrdxlP-dep_de-COase
TraesCS4D02G359700	catalytic activity	molecular_function	GO:0003824	Aromatic_deC
TraesCS4D02G359700	catalytic activity	molecular_function	GO:0003824	PyrdxlP-dep_Trfase_major
TraesCS4D02G359700	catalytic activity	molecular_function	GO:0003824	PyrdxlP-dep_Trfase_dom1
TraesCS4D02G359700	catalytic activity	molecular_function	GO:0003824	PyrdxlP-dep_Trfase
TraesCS4D02G359700	catalytic activity	molecular_function	GO:0003824	Pyridoxal-P_BS
TraesCS4D02G359700	carboxy-lyase activity	molecular_function	GO:0016831	PyrdxlP-dep_de-COase
TraesCS4D02G359700	carboxy-lyase activity	molecular_function	GO:0016831	Aromatic_deC
TraesCS4D02G359700	carboxy-lyase activity	molecular_function	GO:0016831	PyrdxlP-dep_Trfase_major
TraesCS4D02G359700	carboxy-lyase activity	molecular_function	GO:0016831	PyrdxlP-dep_Trfase_dom1
TraesCS4D02G359700	carboxy-lyase activity	molecular_function	GO:0016831	PyrdxlP-dep_Trfase
TraesCS4D02G359700	carboxy-lyase activity	molecular_function	GO:0016831	Pyridoxal-P_BS
TraesCS5A02G044600	protein binding	molecular_function	GO:0005515	Pentatricopeptide_repeat
TraesCS5A02G044600	protein binding	molecular_function	GO:0005515	TPR-like_helical_dom_sf
TraesCS5A02G218400	ligand-gated ion channel activity	molecular_function	GO:0015276	Iontro_rcpt
TraesCS5A02G218400	ligand-gated ion channel activity	molecular_function	GO:0015276	Solute-binding_3/MltF_N
TraesCS5A02G218400	ligand-gated ion channel activity	molecular_function	GO:0015276	ANF_lig-bd_rcpt
TraesCS5A02G218400	ligand-gated ion channel activity	molecular_function	GO:0015276	Iontropic_Glu_rcpt_pln
TraesCS5A02G218400	ligand-gated ion channel activity	molecular_function	GO:0015276	Peripla_BP_I
TraesCS5A02G318100	heme binding	molecular_function	GO:0020037	Cyt_P450
TraesCS5A02G318100	heme binding	molecular_function	GO:0020037	Cyt_P450_E_grp-I
TraesCS5A02G318100	heme binding	molecular_function	GO:0020037	Cyt_P450_CS
TraesCS5A02G318100	heme binding	molecular_function	GO:0020037	Cyt_P450_sf
TraesCS5A02G318100	iron ion binding	molecular_function	GO:0005506	Cyt_P450
TraesCS5A02G318100	iron ion binding	molecular_function	GO:0005506	Cyt_P450_E_grp-I
TraesCS5A02G318100	iron ion binding	molecular_function	GO:0005506	Cyt_P450_CS
TraesCS5A02G318100	iron ion binding	molecular_function	GO:0005506	Cyt_P450_sf
TraesCS5A02G318100	oxidoreductase activity, acting on paired donors, with incorporation or reduction of molecular oxygen	molecular_function	GO:0016705	Cyt_P450
TraesCS5A02G318100	oxidoreductase activity, acting on paired donors, with incorporation or reduction of molecular oxygen	molecular_function	GO:0016705	Cyt_P450_E_grp-I
TraesCS5A02G318100	oxidoreductase activity, acting on paired donors, with incorporation or reduction of molecular oxygen	molecular_function	GO:0016705	Cyt_P450_CS
TraesCS5A02G318100	oxidoreductase activity, acting on paired donors, with incorporation or reduction of molecular oxygen	molecular_function	GO:0016705	Cyt_P450_sf
TraesCS5A02G476900	nucleic acid binding	molecular_function	GO:0003676	Znf_C2H2_type
TraesCS5A02G476900	nucleic acid binding	molecular_function	GO:0003676	Znf_C2H2_sf
TraesCS5A02G527600	oxidoreductase activity	molecular_function	GO:0016491	Cyt_b245_heavy_chain
TraesCS5A02G527600	oxidoreductase activity	molecular_function	GO:0016491	EF_hand_dom
TraesCS5A02G527600	oxidoreductase activity	molecular_function	GO:0016491	EF-hand-dom_pair
TraesCS5A02G527600	oxidoreductase activity	molecular_function	GO:0016491	FAD-bd_8
TraesCS5A02G527600	oxidoreductase activity	molecular_function	GO:0016491	Fe_red_NAD-bd_6
TraesCS5A02G527600	oxidoreductase activity	molecular_function	GO:0016491	Fe3_Rdtase_TM_dom
TraesCS5A02G527600	oxidoreductase activity	molecular_function	GO:0016491	NADPH_Ox
TraesCS5A02G527600	oxidoreductase activity	molecular_function	GO:0016491	FAD-bd_FR_type
TraesCS5A02G527600	oxidoreductase activity	molecular_function	GO:0016491	Riboflavin_synthase-like_b-brl
TraesCS5A02G527600	oxidoreductase activity	molecular_function	GO:0016491	EF_Hand_1_Ca_BS
TraesCS5A02G527600	oxidoreductase activity	molecular_function	GO:0016491	RBOHB
TraesCS5A02G527600	oxidoreductase activity	molecular_function	GO:0016491	FNR_nucleotide-bd
TraesCS5A02G527600	peroxidase activity	molecular_function	GO:0004601	Cyt_b245_heavy_chain
TraesCS5A02G527600	peroxidase activity	molecular_function	GO:0004601	EF_hand_dom
TraesCS5A02G527600	peroxidase activity	molecular_function	GO:0004601	EF-hand-dom_pair
TraesCS5A02G527600	peroxidase activity	molecular_function	GO:0004601	FAD-bd_8
TraesCS5A02G527600	peroxidase activity	molecular_function	GO:0004601	Fe_red_NAD-bd_6
TraesCS5A02G527600	peroxidase activity	molecular_function	GO:0004601	Fe3_Rdtase_TM_dom
TraesCS5A02G527600	peroxidase activity	molecular_function	GO:0004601	NADPH_Ox
TraesCS5A02G527600	peroxidase activity	molecular_function	GO:0004601	FAD-bd_FR_type
TraesCS5A02G527600	peroxidase activity	molecular_function	GO:0004601	Riboflavin_synthase-like_b-brl
TraesCS5A02G527600	peroxidase activity	molecular_function	GO:0004601	EF_Hand_1_Ca_BS
TraesCS5A02G527600	peroxidase activity	molecular_function	GO:0004601	RBOHB
TraesCS5A02G527600	peroxidase activity	molecular_function	GO:0004601	FNR_nucleotide-bd
TraesCS5A02G527600	calcium ion binding	molecular_function	GO:0005509	Cyt_b245_heavy_chain
TraesCS5A02G527600	calcium ion binding	molecular_function	GO:0005509	EF_hand_dom
TraesCS5A02G527600	calcium ion binding	molecular_function	GO:0005509	EF-hand-dom_pair
TraesCS5A02G527600	calcium ion binding	molecular_function	GO:0005509	FAD-bd_8
TraesCS5A02G527600	calcium ion binding	molecular_function	GO:0005509	Fe_red_NAD-bd_6
TraesCS5A02G527600	calcium ion binding	molecular_function	GO:0005509	Fe3_Rdtase_TM_dom
TraesCS5A02G527600	calcium ion binding	molecular_function	GO:0005509	NADPH_Ox
TraesCS5A02G527600	calcium ion binding	molecular_function	GO:0005509	FAD-bd_FR_type
TraesCS5A02G527600	calcium ion binding	molecular_function	GO:0005509	Riboflavin_synthase-like_b-brl
TraesCS5A02G527600	calcium ion binding	molecular_function	GO:0005509	EF_Hand_1_Ca_BS
TraesCS5A02G527600	calcium ion binding	molecular_function	GO:0005509	RBOHB
TraesCS5A02G527600	calcium ion binding	molecular_function	GO:0005509	FNR_nucleotide-bd
TraesCS5A02G527600	oxidoreductase activity, acting on NAD(P)H, oxygen as acceptor	molecular_function	GO:0050664	Cyt_b245_heavy_chain
TraesCS5A02G527600	oxidoreductase activity, acting on NAD(P)H, oxygen as acceptor	molecular_function	GO:0050664	EF_hand_dom
TraesCS5A02G527600	oxidoreductase activity, acting on NAD(P)H, oxygen as acceptor	molecular_function	GO:0050664	EF-hand-dom_pair
TraesCS5A02G527600	oxidoreductase activity, acting on NAD(P)H, oxygen as acceptor	molecular_function	GO:0050664	FAD-bd_8
TraesCS5A02G527600	oxidoreductase activity, acting on NAD(P)H, oxygen as acceptor	molecular_function	GO:0050664	Fe_red_NAD-bd_6
TraesCS5A02G527600	oxidoreductase activity, acting on NAD(P)H, oxygen as acceptor	molecular_function	GO:0050664	Fe3_Rdtase_TM_dom
TraesCS5A02G527600	oxidoreductase activity, acting on NAD(P)H, oxygen as acceptor	molecular_function	GO:0050664	NADPH_Ox
TraesCS5A02G527600	oxidoreductase activity, acting on NAD(P)H, oxygen as acceptor	molecular_function	GO:0050664	FAD-bd_FR_type
TraesCS5A02G527600	oxidoreductase activity, acting on NAD(P)H, oxygen as acceptor	molecular_function	GO:0050664	Riboflavin_synthase-like_b-brl
TraesCS5A02G527600	oxidoreductase activity, acting on NAD(P)H, oxygen as acceptor	molecular_function	GO:0050664	EF_Hand_1_Ca_BS
TraesCS5A02G527600	oxidoreductase activity, acting on NAD(P)H, oxygen as acceptor	molecular_function	GO:0050664	RBOHB
TraesCS5A02G527600	oxidoreductase activity, acting on NAD(P)H, oxygen as acceptor	molecular_function	GO:0050664	FNR_nucleotide-bd
TraesCS5A02G527600	NAD(P)H oxidase activity	molecular_function	GO:0016174	Cyt_b245_heavy_chain
TraesCS5A02G527600	NAD(P)H oxidase activity	molecular_function	GO:0016174	EF_hand_dom
TraesCS5A02G527600	NAD(P)H oxidase activity	molecular_function	GO:0016174	EF-hand-dom_pair
TraesCS5A02G527600	NAD(P)H oxidase activity	molecular_function	GO:0016174	FAD-bd_8
TraesCS5A02G527600	NAD(P)H oxidase activity	molecular_function	GO:0016174	Fe_red_NAD-bd_6
TraesCS5A02G527600	NAD(P)H oxidase activity	molecular_function	GO:0016174	Fe3_Rdtase_TM_dom
TraesCS5A02G527600	NAD(P)H oxidase activity	molecular_function	GO:0016174	NADPH_Ox
TraesCS5A02G527600	NAD(P)H oxidase activity	molecular_function	GO:0016174	FAD-bd_FR_type
TraesCS5A02G527600	NAD(P)H oxidase activity	molecular_function	GO:0016174	Riboflavin_synthase-like_b-brl
TraesCS5A02G527600	NAD(P)H oxidase activity	molecular_function	GO:0016174	EF_Hand_1_Ca_BS
TraesCS5A02G527600	NAD(P)H oxidase activity	molecular_function	GO:0016174	RBOHB
TraesCS5A02G527600	NAD(P)H oxidase activity	molecular_function	GO:0016174	FNR_nucleotide-bd
TraesCS5B02G021200	transferase activity, transferring glycosyl groups	molecular_function	GO:0016757	Glycosyltransferase_61
TraesCS5B02G124400	ATP binding	molecular_function	GO:0005524	Prot_kinase_dom
TraesCS5B02G124400	ATP binding	molecular_function	GO:0005524	Ser-Thr/Tyr_kinase_cat_dom
TraesCS5B02G124400	ATP binding	molecular_function	GO:0005524	ACT_dom
TraesCS5B02G124400	ATP binding	molecular_function	GO:0005524	Ser/Thr_kinase_AS
TraesCS5B02G124400	ATP binding	molecular_function	GO:0005524	Kinase-like_dom_sf
TraesCS5B02G124400	protein kinase activity	molecular_function	GO:0004672	Prot_kinase_dom
TraesCS5B02G124400	protein kinase activity	molecular_function	GO:0004672	Ser-Thr/Tyr_kinase_cat_dom
TraesCS5B02G124400	protein kinase activity	molecular_function	GO:0004672	ACT_dom
TraesCS5B02G124400	protein kinase activity	molecular_function	GO:0004672	Ser/Thr_kinase_AS
TraesCS5B02G124400	protein kinase activity	molecular_function	GO:0004672	Kinase-like_dom_sf
TraesCS5B02G218700	ligand-gated ion channel activity	molecular_function	GO:0015276	Iontro_rcpt
TraesCS5B02G218700	ligand-gated ion channel activity	molecular_function	GO:0015276	Solute-binding_3/MltF_N
TraesCS5B02G218700	ligand-gated ion channel activity	molecular_function	GO:0015276	ANF_lig-bd_rcpt
TraesCS5B02G218700	ligand-gated ion channel activity	molecular_function	GO:0015276	Iontropic_Glu_rcpt_pln
TraesCS5B02G218700	ligand-gated ion channel activity	molecular_function	GO:0015276	Peripla_BP_I
TraesCS5B02G472200	oxidoreductase activity	molecular_function	GO:0016491	SDR_fam
TraesCS5B02G472200	oxidoreductase activity	molecular_function	GO:0016491	Sc_DH/Rdtase_CS
TraesCS5B02G472200	oxidoreductase activity	molecular_function	GO:0016491	NAD(P)-bd_dom_sf
TraesCS5B02G524800	protein binding	molecular_function	GO:0005515	F-box_dom
TraesCS5B02G524800	protein binding	molecular_function	GO:0005515	F-box-like_dom_sf
TraesCS5B02G524900	protein binding	molecular_function	GO:0005515	Gal_Oxase/kelch_b-propeller
TraesCS5B02G524900	protein binding	molecular_function	GO:0005515	F-box-like_dom_sf
TraesCS5D02G098300	protein binding	molecular_function	GO:0005515	DUF629
TraesCS5D02G098300	protein binding	molecular_function	GO:0005515	TPR-like_helical_dom_sf
TraesCS5D02G098300	protein binding	molecular_function	GO:0005515	Papain-like_cys_pep_sf
TraesCS5D02G169000	hydrolase activity, acting on ester bonds	molecular_function	GO:0016788	GDSL
TraesCS5D02G169000	hydrolase activity, acting on ester bonds	molecular_function	GO:0016788	SGNH_plant_lipase-like
TraesCS5D02G169000	hydrolase activity, acting on ester bonds	molecular_function	GO:0016788	SGNH_hydro_sf
TraesCS5D02G272100	peptidyl-prolyl cis-trans isomerase activity	molecular_function	GO:0003755	PPIase_FKBP_dom
TraesCS5D02G344400	ATP binding	molecular_function	GO:0005524	SNF2_N
TraesCS5D02G344400	ATP binding	molecular_function	GO:0005524	Helicase_C
TraesCS5D02G344400	ATP binding	molecular_function	GO:0005524	Helicase_ATP-bd
TraesCS5D02G344400	ATP binding	molecular_function	GO:0005524	P-loop_NTPase
TraesCS5D02G344400	ATP binding	molecular_function	GO:0005524	SNF2-like_sf
TraesCS6A02G042600	ATP binding	molecular_function	GO:0005524	Hsp_70_fam
TraesCS6A02G042600	ATP binding	molecular_function	GO:0005524	Heat_shock_70_CS
TraesCS6A02G042600	ATP binding	molecular_function	GO:0005524	HSP70_peptide-bd_sf
TraesCS6A02G042600	ATP binding	molecular_function	GO:0005524	HSP70_C_sf
TraesCS6A02G042600	ATP binding	molecular_function	GO:0005524	BIP_NBD
TraesCS6A02G049400	nutrient reservoir activity	molecular_function	GO:0045735	Glia_glutenin
TraesCS6A02G049400	nutrient reservoir activity	molecular_function	GO:0045735	Bifunc_inhib/LTP/seed_store
TraesCS6A02G049400	nutrient reservoir activity	molecular_function	GO:0045735	Bifun_inhib/LTP/seed_sf
TraesCS6A02G058500	carbohydrate binding	molecular_function	GO:0030246	Prot_kinase_dom
TraesCS6A02G058500	carbohydrate binding	molecular_function	GO:0030246	Legume_lectin_dom
TraesCS6A02G058500	carbohydrate binding	molecular_function	GO:0030246	Ser/Thr_kinase_AS
TraesCS6A02G058500	carbohydrate binding	molecular_function	GO:0030246	Kinase-like_dom_sf
TraesCS6A02G058500	carbohydrate binding	molecular_function	GO:0030246	ConA-like_dom_sf
TraesCS6A02G058500	carbohydrate binding	molecular_function	GO:0030246	Protein_kinase_ATP_BS
TraesCS6A02G058500	carbohydrate binding	molecular_function	GO:0030246	Lectin_legB_Mn/Ca_BS
TraesCS6A02G058500	carbohydrate binding	molecular_function	GO:0030246	SRK-like_kinase
TraesCS6A02G058500	ATP binding	molecular_function	GO:0005524	Prot_kinase_dom
TraesCS6A02G058500	ATP binding	molecular_function	GO:0005524	Legume_lectin_dom
TraesCS6A02G058500	ATP binding	molecular_function	GO:0005524	Ser/Thr_kinase_AS
TraesCS6A02G058500	ATP binding	molecular_function	GO:0005524	Kinase-like_dom_sf
TraesCS6A02G058500	ATP binding	molecular_function	GO:0005524	ConA-like_dom_sf
TraesCS6A02G058500	ATP binding	molecular_function	GO:0005524	Protein_kinase_ATP_BS
TraesCS6A02G058500	ATP binding	molecular_function	GO:0005524	Lectin_legB_Mn/Ca_BS
TraesCS6A02G058500	ATP binding	molecular_function	GO:0005524	SRK-like_kinase
TraesCS6A02G058500	protein kinase activity	molecular_function	GO:0004672	Prot_kinase_dom
TraesCS6A02G058500	protein kinase activity	molecular_function	GO:0004672	Legume_lectin_dom
TraesCS6A02G058500	protein kinase activity	molecular_function	GO:0004672	Ser/Thr_kinase_AS
TraesCS6A02G058500	protein kinase activity	molecular_function	GO:0004672	Kinase-like_dom_sf
TraesCS6A02G058500	protein kinase activity	molecular_function	GO:0004672	ConA-like_dom_sf
TraesCS6A02G058500	protein kinase activity	molecular_function	GO:0004672	Protein_kinase_ATP_BS
TraesCS6A02G058500	protein kinase activity	molecular_function	GO:0004672	Lectin_legB_Mn/Ca_BS
TraesCS6A02G058500	protein kinase activity	molecular_function	GO:0004672	SRK-like_kinase
TraesCS6A02G058500	protein serine/threonine kinase activity	molecular_function	GO:0004674	Prot_kinase_dom
TraesCS6A02G058500	protein serine/threonine kinase activity	molecular_function	GO:0004674	Legume_lectin_dom
TraesCS6A02G058500	protein serine/threonine kinase activity	molecular_function	GO:0004674	Ser/Thr_kinase_AS
TraesCS6A02G058500	protein serine/threonine kinase activity	molecular_function	GO:0004674	Kinase-like_dom_sf
TraesCS6A02G058500	protein serine/threonine kinase activity	molecular_function	GO:0004674	ConA-like_dom_sf
TraesCS6A02G058500	protein serine/threonine kinase activity	molecular_function	GO:0004674	Protein_kinase_ATP_BS
TraesCS6A02G058500	protein serine/threonine kinase activity	molecular_function	GO:0004674	Lectin_legB_Mn/Ca_BS
TraesCS6A02G058500	protein serine/threonine kinase activity	molecular_function	GO:0004674	SRK-like_kinase
TraesCS6A02G058600	protein binding	molecular_function	GO:0005515	Leu-rich_rpt
TraesCS6A02G058600	protein binding	molecular_function	GO:0005515	Leu-rich_rpt_typical-subtyp
TraesCS6A02G058600	protein binding	molecular_function	GO:0005515	LRR_N_plant-typ
TraesCS6A02G058600	protein binding	molecular_function	GO:0005515	LRR_dom_sf
TraesCS6A02G407900	protein binding	molecular_function	GO:0005515	F-box_dom
TraesCS6A02G407900	protein binding	molecular_function	GO:0005515	LRR_dom_sf
TraesCS6A02G407900	protein binding	molecular_function	GO:0005515	F-box-like_dom_sf
TraesCS6B02G075700	ADP binding	molecular_function	GO:0043531	NB-ARC
TraesCS6B02G075700	ADP binding	molecular_function	GO:0043531	AAA+_ATPase
TraesCS6B02G075700	ADP binding	molecular_function	GO:0043531	P-loop_NTPase
TraesCS6B02G075700	ADP binding	molecular_function	GO:0043531	LRR_dom_sf
TraesCS6B02G075700	ADP binding	molecular_function	GO:0043531	Rx_N
TraesCS6B02G076300	ADP binding	molecular_function	GO:0043531	NB-ARC
TraesCS6B02G076300	ADP binding	molecular_function	GO:0043531	AAA+_ATPase
TraesCS6B02G076300	ADP binding	molecular_function	GO:0043531	P-loop_NTPase
TraesCS6B02G076300	ADP binding	molecular_function	GO:0043531	LRR_dom_sf
TraesCS6B02G076300	ADP binding	molecular_function	GO:0043531	Rx_N
TraesCS6B02G120000	protein binding	molecular_function	GO:0005515	F-box-like_dom_sf
TraesCS6B02G396400	protein binding	molecular_function	GO:0005515	Leu-rich_rpt
TraesCS6B02G396400	protein binding	molecular_function	GO:0005515	Leu-rich_rpt_Cys-con_subtyp
TraesCS6B02G396400	protein binding	molecular_function	GO:0005515	LRR_dom_sf
TraesCS6B02G417400	ATP binding	molecular_function	GO:0005524	Kinesin_motor_dom
TraesCS6B02G417400	ATP binding	molecular_function	GO:0005524	P-loop_NTPase
TraesCS6B02G417400	ATP binding	molecular_function	GO:0005524	Kinesin-like_fam
TraesCS6B02G417400	ATP binding	molecular_function	GO:0005524	Kinesin_motor_dom_sf
TraesCS6B02G417400	microtubule binding	molecular_function	GO:0008017	Kinesin_motor_dom
TraesCS6B02G417400	microtubule binding	molecular_function	GO:0008017	P-loop_NTPase
TraesCS6B02G417400	microtubule binding	molecular_function	GO:0008017	Kinesin-like_fam
TraesCS6B02G417400	microtubule binding	molecular_function	GO:0008017	Kinesin_motor_dom_sf
TraesCS6B02G417400	microtubule motor activity	molecular_function	GO:0003777	Kinesin_motor_dom
TraesCS6B02G417400	microtubule motor activity	molecular_function	GO:0003777	P-loop_NTPase
TraesCS6B02G417400	microtubule motor activity	molecular_function	GO:0003777	Kinesin-like_fam
TraesCS6B02G417400	microtubule motor activity	molecular_function	GO:0003777	Kinesin_motor_dom_sf
TraesCS6B02G463700	ADP binding	molecular_function	GO:0043531	NB-ARC
TraesCS6B02G463700	ADP binding	molecular_function	GO:0043531	P-loop_NTPase
TraesCS6B02G463700	ADP binding	molecular_function	GO:0043531	LRR_dom_sf
TraesCS6B02G468800	ADP binding	molecular_function	GO:0043531	NB-ARC
TraesCS6B02G468800	ADP binding	molecular_function	GO:0043531	P-loop_NTPase
TraesCS6B02G468800	ADP binding	molecular_function	GO:0043531	RX-like_CC
TraesCS6B02G468800	ADP binding	molecular_function	GO:0043531	Rx_N
TraesCS6D02G008900	hydrolase activity, acting on ester bonds	molecular_function	GO:0016788	GDSL
TraesCS6D02G008900	hydrolase activity, acting on ester bonds	molecular_function	GO:0016788	SGNH_plant_lipase-like
TraesCS6D02G008900	hydrolase activity, acting on ester bonds	molecular_function	GO:0016788	SGNH_hydro_sf
TraesCS6D02G047700	protein binding	molecular_function	GO:0005515	Pentatricopeptide_repeat
TraesCS6D02G047700	protein binding	molecular_function	GO:0005515	TPR-like_helical_dom_sf
TraesCS6D02G052300	protein binding	molecular_function	GO:0005515	F-box_dom
TraesCS6D02G052300	protein binding	molecular_function	GO:0005515	LRR_dom_sf
TraesCS6D02G052300	protein binding	molecular_function	GO:0005515	F-box-like_dom_sf
TraesCS6D02G057800	heme binding	molecular_function	GO:0020037	Cyt_P450
TraesCS6D02G057800	heme binding	molecular_function	GO:0020037	Cyt_P450_E_grp-I
TraesCS6D02G057800	heme binding	molecular_function	GO:0020037	Cyt_P450_CS
TraesCS6D02G057800	heme binding	molecular_function	GO:0020037	Cyt_P450_sf
TraesCS6D02G057800	iron ion binding	molecular_function	GO:0005506	Cyt_P450
TraesCS6D02G057800	iron ion binding	molecular_function	GO:0005506	Cyt_P450_E_grp-I
TraesCS6D02G057800	iron ion binding	molecular_function	GO:0005506	Cyt_P450_CS
TraesCS6D02G057800	iron ion binding	molecular_function	GO:0005506	Cyt_P450_sf
TraesCS6D02G057800	oxidoreductase activity, acting on paired donors, with incorporation or reduction of molecular oxygen	molecular_function	GO:0016705	Cyt_P450
TraesCS6D02G057800	oxidoreductase activity, acting on paired donors, with incorporation or reduction of molecular oxygen	molecular_function	GO:0016705	Cyt_P450_E_grp-I
TraesCS6D02G057800	oxidoreductase activity, acting on paired donors, with incorporation or reduction of molecular oxygen	molecular_function	GO:0016705	Cyt_P450_CS
TraesCS6D02G057800	oxidoreductase activity, acting on paired donors, with incorporation or reduction of molecular oxygen	molecular_function	GO:0016705	Cyt_P450_sf
TraesCS6D02G375700	ATP binding	molecular_function	GO:0005524	Prot_kinase_dom
TraesCS6D02G375700	ATP binding	molecular_function	GO:0005524	S_locus_glycoprot_dom
TraesCS6D02G375700	ATP binding	molecular_function	GO:0005524	Ser-Thr/Tyr_kinase_cat_dom
TraesCS6D02G375700	ATP binding	molecular_function	GO:0005524	Bulb-type_lectin_dom
TraesCS6D02G375700	ATP binding	molecular_function	GO:0005524	Pan_app
TraesCS6D02G375700	ATP binding	molecular_function	GO:0005524	Ser/Thr_kinase_AS
TraesCS6D02G375700	ATP binding	molecular_function	GO:0005524	Kinase-like_dom_sf
TraesCS6D02G375700	ATP binding	molecular_function	GO:0005524	Protein_kinase_ATP_BS
TraesCS6D02G375700	ATP binding	molecular_function	GO:0005524	SRK-like_kinase
TraesCS6D02G375700	ATP binding	molecular_function	GO:0005524	Bulb-type_lectin_dom_sf
TraesCS6D02G375700	protein kinase activity	molecular_function	GO:0004672	Prot_kinase_dom
TraesCS6D02G375700	protein kinase activity	molecular_function	GO:0004672	S_locus_glycoprot_dom
TraesCS6D02G375700	protein kinase activity	molecular_function	GO:0004672	Ser-Thr/Tyr_kinase_cat_dom
TraesCS6D02G375700	protein kinase activity	molecular_function	GO:0004672	Bulb-type_lectin_dom
TraesCS6D02G375700	protein kinase activity	molecular_function	GO:0004672	Pan_app
TraesCS6D02G375700	protein kinase activity	molecular_function	GO:0004672	Ser/Thr_kinase_AS
TraesCS6D02G375700	protein kinase activity	molecular_function	GO:0004672	Kinase-like_dom_sf
TraesCS6D02G375700	protein kinase activity	molecular_function	GO:0004672	Protein_kinase_ATP_BS
TraesCS6D02G375700	protein kinase activity	molecular_function	GO:0004672	SRK-like_kinase
TraesCS6D02G375700	protein kinase activity	molecular_function	GO:0004672	Bulb-type_lectin_dom_sf
TraesCS6D02G375700	protein serine/threonine kinase activity	molecular_function	GO:0004674	Prot_kinase_dom
TraesCS6D02G375700	protein serine/threonine kinase activity	molecular_function	GO:0004674	S_locus_glycoprot_dom
TraesCS6D02G375700	protein serine/threonine kinase activity	molecular_function	GO:0004674	Ser-Thr/Tyr_kinase_cat_dom
TraesCS6D02G375700	protein serine/threonine kinase activity	molecular_function	GO:0004674	Bulb-type_lectin_dom
TraesCS6D02G375700	protein serine/threonine kinase activity	molecular_function	GO:0004674	Pan_app
TraesCS6D02G375700	protein serine/threonine kinase activity	molecular_function	GO:0004674	Ser/Thr_kinase_AS
TraesCS6D02G375700	protein serine/threonine kinase activity	molecular_function	GO:0004674	Kinase-like_dom_sf
TraesCS6D02G375700	protein serine/threonine kinase activity	molecular_function	GO:0004674	Protein_kinase_ATP_BS
TraesCS6D02G375700	protein serine/threonine kinase activity	molecular_function	GO:0004674	SRK-like_kinase
TraesCS6D02G375700	protein serine/threonine kinase activity	molecular_function	GO:0004674	Bulb-type_lectin_dom_sf
TraesCS7A02G005000	ADP binding	molecular_function	GO:0043531	NB-ARC
TraesCS7A02G005000	ADP binding	molecular_function	GO:0043531	P-loop_NTPase
TraesCS7A02G005000	ADP binding	molecular_function	GO:0043531	RX-like_CC
TraesCS7A02G005000	ADP binding	molecular_function	GO:0043531	Rx_N
TraesCS7A02G059500	pyridoxal phosphate binding	molecular_function	GO:0030170	PyrdxlP-dep_de-COase
TraesCS7A02G059500	pyridoxal phosphate binding	molecular_function	GO:0030170	Aromatic_deC
TraesCS7A02G059500	pyridoxal phosphate binding	molecular_function	GO:0030170	PyrdxlP-dep_Trfase_major
TraesCS7A02G059500	pyridoxal phosphate binding	molecular_function	GO:0030170	PyrdxlP-dep_Trfase_dom1
TraesCS7A02G059500	pyridoxal phosphate binding	molecular_function	GO:0030170	PyrdxlP-dep_Trfase
TraesCS7A02G059500	pyridoxal phosphate binding	molecular_function	GO:0030170	Pyridoxal-P_BS
TraesCS7A02G059500	catalytic activity	molecular_function	GO:0003824	PyrdxlP-dep_de-COase
TraesCS7A02G059500	catalytic activity	molecular_function	GO:0003824	Aromatic_deC
TraesCS7A02G059500	catalytic activity	molecular_function	GO:0003824	PyrdxlP-dep_Trfase_major
TraesCS7A02G059500	catalytic activity	molecular_function	GO:0003824	PyrdxlP-dep_Trfase_dom1
TraesCS7A02G059500	catalytic activity	molecular_function	GO:0003824	PyrdxlP-dep_Trfase
TraesCS7A02G059500	catalytic activity	molecular_function	GO:0003824	Pyridoxal-P_BS
TraesCS7A02G059500	carboxy-lyase activity	molecular_function	GO:0016831	PyrdxlP-dep_de-COase
TraesCS7A02G059500	carboxy-lyase activity	molecular_function	GO:0016831	Aromatic_deC
TraesCS7A02G059500	carboxy-lyase activity	molecular_function	GO:0016831	PyrdxlP-dep_Trfase_major
TraesCS7A02G059500	carboxy-lyase activity	molecular_function	GO:0016831	PyrdxlP-dep_Trfase_dom1
TraesCS7A02G059500	carboxy-lyase activity	molecular_function	GO:0016831	PyrdxlP-dep_Trfase
TraesCS7A02G059500	carboxy-lyase activity	molecular_function	GO:0016831	Pyridoxal-P_BS
TraesCS7A02G085400	carbohydrate binding	molecular_function	GO:0030246	Prot_kinase_dom
TraesCS7A02G085400	carbohydrate binding	molecular_function	GO:0030246	Legume_lectin_dom
TraesCS7A02G085400	carbohydrate binding	molecular_function	GO:0030246	Ser/Thr_kinase_AS
TraesCS7A02G085400	carbohydrate binding	molecular_function	GO:0030246	Kinase-like_dom_sf
TraesCS7A02G085400	carbohydrate binding	molecular_function	GO:0030246	ConA-like_dom_sf
TraesCS7A02G085400	carbohydrate binding	molecular_function	GO:0030246	Protein_kinase_ATP_BS
TraesCS7A02G085400	ATP binding	molecular_function	GO:0005524	Prot_kinase_dom
TraesCS7A02G085400	ATP binding	molecular_function	GO:0005524	Legume_lectin_dom
TraesCS7A02G085400	ATP binding	molecular_function	GO:0005524	Ser/Thr_kinase_AS
TraesCS7A02G085400	ATP binding	molecular_function	GO:0005524	Kinase-like_dom_sf
TraesCS7A02G085400	ATP binding	molecular_function	GO:0005524	ConA-like_dom_sf
TraesCS7A02G085400	ATP binding	molecular_function	GO:0005524	Protein_kinase_ATP_BS
TraesCS7A02G085400	protein kinase activity	molecular_function	GO:0004672	Prot_kinase_dom
TraesCS7A02G085400	protein kinase activity	molecular_function	GO:0004672	Legume_lectin_dom
TraesCS7A02G085400	protein kinase activity	molecular_function	GO:0004672	Ser/Thr_kinase_AS
TraesCS7A02G085400	protein kinase activity	molecular_function	GO:0004672	Kinase-like_dom_sf
TraesCS7A02G085400	protein kinase activity	molecular_function	GO:0004672	ConA-like_dom_sf
TraesCS7A02G085400	protein kinase activity	molecular_function	GO:0004672	Protein_kinase_ATP_BS
TraesCS7A02G500800	protein dimerization activity	molecular_function	GO:0046983	HLH_DNA-bd_sf
TraesCS7D02G005400	nucleic acid binding	molecular_function	GO:0003676	NB-ARC
TraesCS7D02G005400	nucleic acid binding	molecular_function	GO:0003676	Kelch_1
TraesCS7D02G005400	nucleic acid binding	molecular_function	GO:0003676	Znf_C2H2_type
TraesCS7D02G005400	nucleic acid binding	molecular_function	GO:0003676	Kelch-typ_b-propeller
TraesCS7D02G005400	nucleic acid binding	molecular_function	GO:0003676	P-loop_NTPase
TraesCS7D02G005400	nucleic acid binding	molecular_function	GO:0003676	LRR_dom_sf
TraesCS7D02G005400	nucleic acid binding	molecular_function	GO:0003676	Rx_N
TraesCS7D02G005400	ADP binding	molecular_function	GO:0043531	NB-ARC
TraesCS7D02G005400	ADP binding	molecular_function	GO:0043531	Kelch_1
TraesCS7D02G005400	ADP binding	molecular_function	GO:0043531	Znf_C2H2_type
TraesCS7D02G005400	ADP binding	molecular_function	GO:0043531	Kelch-typ_b-propeller
TraesCS7D02G005400	ADP binding	molecular_function	GO:0043531	P-loop_NTPase
TraesCS7D02G005400	ADP binding	molecular_function	GO:0043531	LRR_dom_sf
TraesCS7D02G005400	ADP binding	molecular_function	GO:0043531	Rx_N
TraesCS7D02G005400	protein binding	molecular_function	GO:0005515	NB-ARC
TraesCS7D02G005400	protein binding	molecular_function	GO:0005515	Kelch_1
TraesCS7D02G005400	protein binding	molecular_function	GO:0005515	Znf_C2H2_type
TraesCS7D02G005400	protein binding	molecular_function	GO:0005515	Kelch-typ_b-propeller
TraesCS7D02G005400	protein binding	molecular_function	GO:0005515	P-loop_NTPase
TraesCS7D02G005400	protein binding	molecular_function	GO:0005515	LRR_dom_sf
TraesCS7D02G005400	protein binding	molecular_function	GO:0005515	Rx_N
TraesCS7D02G008000	ADP binding	molecular_function	GO:0043531	NB-ARC
TraesCS7D02G008000	ADP binding	molecular_function	GO:0043531	P-loop_NTPase
TraesCS7D02G008000	ADP binding	molecular_function	GO:0043531	LRR_dom_sf
TraesCS7D02G008000	ADP binding	molecular_function	GO:0043531	RX-like_CC
TraesCS7D02G008000	ADP binding	molecular_function	GO:0043531	Rx_N
TraesCS7D02G201500	NAD+ ADP-ribosyltransferase activity	molecular_function	GO:0003950	Poly(ADP-ribose)pol_cat_dom
TraesCS7D02G201500	NAD+ ADP-ribosyltransferase activity	molecular_function	GO:0003950	RST
TraesCS7D02G201500	NAD+ ADP-ribosyltransferase activity	molecular_function	GO:0003950	WWE_dom_sf
TraesCS7D02G493200	protein binding	molecular_function	GO:0005515	F-box_dom
TraesCS7D02G493200	protein binding	molecular_function	GO:0005515	F-box-assoc_dom_typ3
TraesCS7D02G493200	protein binding	molecular_function	GO:0005515	F-box-assoc_interact_dom
TraesCS7D02G493200	protein binding	molecular_function	GO:0005515	F-box-like_dom_sf
TraesCS7D02G526700	ATP binding	molecular_function	GO:0005524	Prot_kinase_dom
TraesCS7D02G526700	ATP binding	molecular_function	GO:0005524	Ser/Thr_kinase_AS
TraesCS7D02G526700	ATP binding	molecular_function	GO:0005524	Kinase-like_dom_sf
TraesCS7D02G526700	ATP binding	molecular_function	GO:0005524	Protein_kinase_ATP_BS
TraesCS7D02G526700	protein kinase activity	molecular_function	GO:0004672	Prot_kinase_dom
TraesCS7D02G526700	protein kinase activity	molecular_function	GO:0004672	Ser/Thr_kinase_AS
TraesCS7D02G526700	protein kinase activity	molecular_function	GO:0004672	Kinase-like_dom_sf
TraesCS7D02G526700	protein kinase activity	molecular_function	GO:0004672	Protein_kinase_ATP_BS
TraesCS7D02G538900	protein dimerization activity	molecular_function	GO:0046983	O_MeTrfase_dom
TraesCS7D02G538900	protein dimerization activity	molecular_function	GO:0046983	Plant_MeTrfase_dimerisation
TraesCS7D02G538900	protein dimerization activity	molecular_function	GO:0046983	O-MeTrfase_COMT
TraesCS7D02G538900	protein dimerization activity	molecular_function	GO:0046983	SAM-dependent_MTases
TraesCS7D02G538900	protein dimerization activity	molecular_function	GO:0046983	WH-like_DNA-bd_sf
TraesCS7D02G538900	protein dimerization activity	molecular_function	GO:0046983	WH_DNA-bd_sf
TraesCS7D02G538900	methyltransferase activity	molecular_function	GO:0008168	O_MeTrfase_dom
TraesCS7D02G538900	methyltransferase activity	molecular_function	GO:0008168	Plant_MeTrfase_dimerisation
TraesCS7D02G538900	methyltransferase activity	molecular_function	GO:0008168	O-MeTrfase_COMT
TraesCS7D02G538900	methyltransferase activity	molecular_function	GO:0008168	SAM-dependent_MTases
TraesCS7D02G538900	methyltransferase activity	molecular_function	GO:0008168	WH-like_DNA-bd_sf
TraesCS7D02G538900	methyltransferase activity	molecular_function	GO:0008168	WH_DNA-bd_sf
TraesCS7D02G538900	O-methyltransferase activity	molecular_function	GO:0008171	O_MeTrfase_dom
TraesCS7D02G538900	O-methyltransferase activity	molecular_function	GO:0008171	Plant_MeTrfase_dimerisation
TraesCS7D02G538900	O-methyltransferase activity	molecular_function	GO:0008171	O-MeTrfase_COMT
TraesCS7D02G538900	O-methyltransferase activity	molecular_function	GO:0008171	SAM-dependent_MTases
TraesCS7D02G538900	O-methyltransferase activity	molecular_function	GO:0008171	WH-like_DNA-bd_sf
TraesCS7D02G538900	O-methyltransferase activity	molecular_function	GO:0008171	WH_DNA-bd_sf
TraesCS7D02G545300	protein binding	molecular_function	GO:0005515	Gal_Oxase/kelch_b-propeller
TraesCS7D02G545300	protein binding	molecular_function	GO:0005515	F-box-like_dom_sf
TraesCS7D02G555000	cellulose synthase (UDP-forming) activity	molecular_function	GO:0016760	Cellulose_synth
TraesCS7D02G555000	cellulose synthase (UDP-forming) activity	molecular_function	GO:0016760	Nucleotide-diphossugar_trans
TraesCSU02G015100	metal ion binding	molecular_function	GO:0046872	Peroxidase_pln
TraesCSU02G015100	metal ion binding	molecular_function	GO:0046872	Haem_peroxidase
TraesCSU02G015100	metal ion binding	molecular_function	GO:0046872	Haem_peroxidase_sf
TraesCSU02G015100	metal ion binding	molecular_function	GO:0046872	Peroxidases_heam-ligand_BS
TraesCSU02G015100	metal ion binding	molecular_function	GO:0046872	Secretory_peroxidase
TraesCSU02G015100	peroxidase activity	molecular_function	GO:0004601	Peroxidase_pln
TraesCSU02G015100	peroxidase activity	molecular_function	GO:0004601	Haem_peroxidase
TraesCSU02G015100	peroxidase activity	molecular_function	GO:0004601	Haem_peroxidase_sf
TraesCSU02G015100	peroxidase activity	molecular_function	GO:0004601	Peroxidases_heam-ligand_BS
TraesCSU02G015100	peroxidase activity	molecular_function	GO:0004601	Secretory_peroxidase
TraesCSU02G015100	heme binding	molecular_function	GO:0020037	Peroxidase_pln
TraesCSU02G015100	heme binding	molecular_function	GO:0020037	Haem_peroxidase
TraesCSU02G015100	heme binding	molecular_function	GO:0020037	Haem_peroxidase_sf
TraesCSU02G015100	heme binding	molecular_function	GO:0020037	Peroxidases_heam-ligand_BS
TraesCSU02G015100	heme binding	molecular_function	GO:0020037	Secretory_peroxidase
TraesCSU02G083900	ADP binding	molecular_function	GO:0043531	NB-ARC
TraesCSU02G083900	ADP binding	molecular_function	GO:0043531	P-loop_NTPase
TraesCSU02G083900	ADP binding	molecular_function	GO:0043531	LRR_dom_sf
TraesCSU02G089563	protein binding	molecular_function	GO:0005515	Pentatricopeptide_repeat
TraesCSU02G089563	protein binding	molecular_function	GO:0005515	TPR-like_helical_dom_sf
TraesCSU02G154600	copper ion binding	molecular_function	GO:0005507	CcO_II-like_C
TraesCSU02G154600	copper ion binding	molecular_function	GO:0005507	Cupredoxin
TraesCSU02G154600	copper ion binding	molecular_function	GO:0005507	Cyt_c_oxidase_su2_TM_dom
TraesCSU02G154600	copper ion binding	molecular_function	GO:0005507	CcO_II_C
TraesCSU02G154600	copper ion binding	molecular_function	GO:0005507	Cyt_c_oxidase_su2_TM_sf
TraesCSU02G154600	cytochrome-c oxidase activity	molecular_function	GO:0004129	CcO_II-like_C
TraesCSU02G154600	cytochrome-c oxidase activity	molecular_function	GO:0004129	Cupredoxin
TraesCSU02G154600	cytochrome-c oxidase activity	molecular_function	GO:0004129	Cyt_c_oxidase_su2_TM_dom
TraesCSU02G154600	cytochrome-c oxidase activity	molecular_function	GO:0004129	CcO_II_C
TraesCSU02G154600	cytochrome-c oxidase activity	molecular_function	GO:0004129	Cyt_c_oxidase_su2_TM_sf
TraesCSU02G155100	heme binding	molecular_function	GO:0020037	Cyt_P450
TraesCSU02G155100	heme binding	molecular_function	GO:0020037	Cyt_P450_E_grp-I
TraesCSU02G155100	heme binding	molecular_function	GO:0020037	Cyt_P450_CS
TraesCSU02G155100	heme binding	molecular_function	GO:0020037	Cyt_P450_sf
TraesCSU02G155100	iron ion binding	molecular_function	GO:0005506	Cyt_P450
TraesCSU02G155100	iron ion binding	molecular_function	GO:0005506	Cyt_P450_E_grp-I
TraesCSU02G155100	iron ion binding	molecular_function	GO:0005506	Cyt_P450_CS
TraesCSU02G155100	iron ion binding	molecular_function	GO:0005506	Cyt_P450_sf
TraesCSU02G155100	oxidoreductase activity, acting on paired donors, with incorporation or reduction of molecular oxygen	molecular_function	GO:0016705	Cyt_P450
TraesCSU02G155100	oxidoreductase activity, acting on paired donors, with incorporation or reduction of molecular oxygen	molecular_function	GO:0016705	Cyt_P450_E_grp-I
TraesCSU02G155100	oxidoreductase activity, acting on paired donors, with incorporation or reduction of molecular oxygen	molecular_function	GO:0016705	Cyt_P450_CS
TraesCSU02G155100	oxidoreductase activity, acting on paired donors, with incorporation or reduction of molecular oxygen	molecular_function	GO:0016705	Cyt_P450_sf
TraesCSU02G206500	heme binding	molecular_function	GO:0020037	Cyt_P450
TraesCSU02G206500	heme binding	molecular_function	GO:0020037	Cyt_P450_E_grp-I
TraesCSU02G206500	heme binding	molecular_function	GO:0020037	Cyt_P450_CS
TraesCSU02G206500	heme binding	molecular_function	GO:0020037	Cyt_P450_sf
TraesCSU02G206500	monooxygenase activity	molecular_function	GO:0004497	Cyt_P450
TraesCSU02G206500	monooxygenase activity	molecular_function	GO:0004497	Cyt_P450_E_grp-I
TraesCSU02G206500	monooxygenase activity	molecular_function	GO:0004497	Cyt_P450_CS
TraesCSU02G206500	monooxygenase activity	molecular_function	GO:0004497	Cyt_P450_sf
TraesCSU02G206500	iron ion binding	molecular_function	GO:0005506	Cyt_P450
TraesCSU02G206500	iron ion binding	molecular_function	GO:0005506	Cyt_P450_E_grp-I
TraesCSU02G206500	iron ion binding	molecular_function	GO:0005506	Cyt_P450_CS
TraesCSU02G206500	iron ion binding	molecular_function	GO:0005506	Cyt_P450_sf
TraesCSU02G206500	oxidoreductase activity, acting on paired donors, with incorporation or reduction of molecular oxygen	molecular_function	GO:0016705	Cyt_P450
TraesCSU02G206500	oxidoreductase activity, acting on paired donors, with incorporation or reduction of molecular oxygen	molecular_function	GO:0016705	Cyt_P450_E_grp-I
TraesCSU02G206500	oxidoreductase activity, acting on paired donors, with incorporation or reduction of molecular oxygen	molecular_function	GO:0016705	Cyt_P450_CS
TraesCSU02G206500	oxidoreductase activity, acting on paired donors, with incorporation or reduction of molecular oxygen	molecular_function	GO:0016705	Cyt_P450_sf
TraesCSU02G231100	protein binding	molecular_function	GO:0005515	Glutathione_S-Trfase_N
TraesCSU02G231100	protein binding	molecular_function	GO:0005515	Glutathione-S-Trfase_C-like
TraesCSU02G231100	protein binding	molecular_function	GO:0005515	Thioredoxin-like_sf
TraesCSU02G231100	protein binding	molecular_function	GO:0005515	Glutathione-S-Trfase_C_sf
TraesCSU02G231100	protein binding	molecular_function	GO:0005515	Glutathione_S-Trfase
TraesCSU02G237600	sulfotransferase activity	molecular_function	GO:0008146	Sulfotransferase_dom
TraesCSU02G237600	sulfotransferase activity	molecular_function	GO:0008146	P-loop_NTPase
TraesCSU02G241700	ATP binding	molecular_function	GO:0005524	Prot_kinase_dom
TraesCSU02G241700	ATP binding	molecular_function	GO:0005524	Ser-Thr/Tyr_kinase_cat_dom
TraesCSU02G241700	ATP binding	molecular_function	GO:0005524	Ser/Thr_kinase_AS
TraesCSU02G241700	ATP binding	molecular_function	GO:0005524	Kinase-like_dom_sf
TraesCSU02G241700	protein kinase activity	molecular_function	GO:0004672	Prot_kinase_dom
TraesCSU02G241700	protein kinase activity	molecular_function	GO:0004672	Ser-Thr/Tyr_kinase_cat_dom
TraesCSU02G241700	protein kinase activity	molecular_function	GO:0004672	Ser/Thr_kinase_AS
TraesCSU02G241700	protein kinase activity	molecular_function	GO:0004672	Kinase-like_dom_sf
TraesCSU02G243800	ATP binding	molecular_function	GO:0005524	Prot_kinase_dom
TraesCSU02G243800	ATP binding	molecular_function	GO:0005524	S_locus_glycoprot_dom
TraesCSU02G243800	ATP binding	molecular_function	GO:0005524	Pan_app
TraesCSU02G243800	ATP binding	molecular_function	GO:0005524	Ser/Thr_kinase_AS
TraesCSU02G243800	ATP binding	molecular_function	GO:0005524	Kinase-like_dom_sf
TraesCSU02G243800	ATP binding	molecular_function	GO:0005524	Protein_kinase_ATP_BS
TraesCSU02G243800	protein kinase activity	molecular_function	GO:0004672	Prot_kinase_dom
TraesCSU02G243800	protein kinase activity	molecular_function	GO:0004672	S_locus_glycoprot_dom
TraesCSU02G243800	protein kinase activity	molecular_function	GO:0004672	Pan_app
TraesCSU02G243800	protein kinase activity	molecular_function	GO:0004672	Ser/Thr_kinase_AS
TraesCSU02G243800	protein kinase activity	molecular_function	GO:0004672	Kinase-like_dom_sf
TraesCSU02G243800	protein kinase activity	molecular_function	GO:0004672	Protein_kinase_ATP_BS
TraesCSU02G249900	pyridoxal phosphate binding	molecular_function	GO:0030170	PyrdxlP-dep_de-COase
TraesCSU02G249900	pyridoxal phosphate binding	molecular_function	GO:0030170	Aromatic_deC
TraesCSU02G249900	pyridoxal phosphate binding	molecular_function	GO:0030170	PyrdxlP-dep_Trfase_major
TraesCSU02G249900	pyridoxal phosphate binding	molecular_function	GO:0030170	PyrdxlP-dep_Trfase_dom1
TraesCSU02G249900	pyridoxal phosphate binding	molecular_function	GO:0030170	PyrdxlP-dep_Trfase
TraesCSU02G249900	pyridoxal phosphate binding	molecular_function	GO:0030170	Pyridoxal-P_BS
TraesCSU02G249900	catalytic activity	molecular_function	GO:0003824	PyrdxlP-dep_de-COase
TraesCSU02G249900	catalytic activity	molecular_function	GO:0003824	Aromatic_deC
TraesCSU02G249900	catalytic activity	molecular_function	GO:0003824	PyrdxlP-dep_Trfase_major
TraesCSU02G249900	catalytic activity	molecular_function	GO:0003824	PyrdxlP-dep_Trfase_dom1
TraesCSU02G249900	catalytic activity	molecular_function	GO:0003824	PyrdxlP-dep_Trfase
TraesCSU02G249900	catalytic activity	molecular_function	GO:0003824	Pyridoxal-P_BS
TraesCSU02G249900	carboxy-lyase activity	molecular_function	GO:0016831	PyrdxlP-dep_de-COase
TraesCSU02G249900	carboxy-lyase activity	molecular_function	GO:0016831	Aromatic_deC
TraesCSU02G249900	carboxy-lyase activity	molecular_function	GO:0016831	PyrdxlP-dep_Trfase_major
TraesCSU02G249900	carboxy-lyase activity	molecular_function	GO:0016831	PyrdxlP-dep_Trfase_dom1
TraesCSU02G249900	carboxy-lyase activity	molecular_function	GO:0016831	PyrdxlP-dep_Trfase
TraesCSU02G249900	carboxy-lyase activity	molecular_function	GO:0016831	Pyridoxal-P_BS
TraesCS1A02G000100
TraesCS1A02G001100
TraesCS1A02G001200
TraesCS1A02G038828
TraesCS1A02G078700
TraesCS1A02G393300				CLE1/3/4
TraesCS1B02G151500
TraesCS2B02G024900				P-loop_NTPase
TraesCS2B02G024900				Rx_N
TraesCS2B02G065700				PGG_dom
TraesCS2B02G207300
TraesCS2B02G252300
TraesCS2B02G524600				DUF597
TraesCS2B02G621100
TraesCS3B02G157400
TraesCS3B02G191900				DUF1618
TraesCS3B02G556000				DUF247_pln
TraesCS3D02G458300				DUF295
TraesCS4A02G179500				AA_transpt_TM
TraesCS4A02G393800				LRR_dom_sf
TraesCS4B02G028300				Poa_pIX/Phl_pVI
TraesCS4B02G028300				Pollen_allergen/Os
TraesCS4B02G170000				PA_domain
TraesCS4B02G170000				Thioredoxin-like_sf
TraesCS4D02G166500				FMP27_GFWDK_dom
TraesCS4D02G166500				FMP27_C
TraesCS5B02G024500
TraesCS5B02G250200				Uncharacterised_Ycf68
TraesCS5D02G559000
TraesCS6A02G001200
TraesCS6B02G005000
TraesCS6B02G014300
TraesCS6B02G117700
TraesCS6B02G117900
TraesCS6B02G132000
TraesCS6B02G241800				BRX1
TraesCS6D02G344400
TraesCS6D02G376300
TraesCS7A02G553900				Nodulin-like
TraesCS7A02G553900				MFS_trans_sf
TraesCS7B02G352700
TraesCS7D02G004300				NA-bd_OB-fold
TraesCS7D02G047700				DUF4220
TraesCS7D02G542500				LRR_dom_sf
TraesCSU02G000200
TraesCSU02G075700
TraesCSU02G084000				DUF594
TraesCSU02G084000				DUF4220
TraesCSU02G153200				LRR_dom_sf
TraesCSU02G217200				PP2-like
TraesCSU02G226800				DUF295
TraesCSU02G232600				DUF1719
TraesCSU02G233300				Amidase_dom
TraesCSU02G233300				AS_sf
TraesCSU02G248100				Invertase/methylesterase_inhib
TraesCSU02G254100
TraesCSU02G258900
TraesCSU02G260700
TraesCSU02G263900
TraesCSU02G264700
TraesCSU02G267700
TraesCSU02G269600
TraesCSU02G269900
TraesCSU02G271200
