# Supplementary material for: Pathogen-induced alterations in methylome during Lr48-mediated APR in wheat (Triticum aestivum L.)&nbsp;
Source: Research Square preprint supplement (doi:10.21203/rs.3.rs-336817/v1), 2021-03-23
Supplement: Supplementary file 3 [file 4d7d138357bdcb34a13d347a.xls]

## Sheet: Sheet1
Supplementary Table S23 List of primers for representative genes used in quantitative real time-PCR (qRT-PCR) expression profiling.
No	Gene ID	Protein product	Treatment pair	Forward sequence	Reverse sequence
1	TraesCS1B02G047700	Photosystem I	Ro vs R96	CAACCAGTTCCGCCGTAGAT	CTCGTAGGACCCGAAGATGC
2	TraesCS1D02G179200	ATP-dependent Clp protease proteolytic subunit	Ro vs R96	TTTAAGCTTTCCCCAGCCCC	AGCAACGAACTCGTAGTCTACTC
3	TraesCS2B02G330500	NADH dehydrogenase (ubiquinone) activity	Ro vs R96	TCCAATCGTGGATATTATGCCTGT	TCGAAAACTTACAACAACTTGCCA
4	TraesCS2D02G584400	SAP domain-containing protein	Ro vs R96	CTACTTCTCCTCCCGGGGTT	CTCTGGATTGCCTGGGGAAA
5	TraesCS3A02G006900	Uncharacterized protein	Ro vs R96	TCTTGGCGGATTCCAGTGTC	AAATGTGTGGTTTGCCTCGC
6	TraesCS3B02G186300	double-stranded DNA binding	Ro vs R96	TTTCGTTGGGGATTCCCTGG	CTGGCCCCGGATTTCCATAA
7	TraesCS3B02G187300	ATP-dependent Clp protease proteolytic subunit	Ro vs R96	AAAGAATCCGCAGTTTATTGTCTT	TCGAATCACCCATTCCTTTTTCTT
8	TraesCS5B02G057400	Cytochrom_C_asm domain-containing protein	Ro vs R96	GACTCCCGTGACCAGGAAGA	GGGAACCCTTCCGATAGCTT
9	TraesCS5B02G097400	Uncharacterized protein	Ro vs R96	TGGAACCGTGGTAGATGCTG	TGCCGGTGAGCAGAGTTTTA
10	TraesCS6A02G184800	Acyl-coenzyme A oxidase	Ro vs R96	TAAAGCGTATCAGCCGACCC	AGCAATTCCCATTCCACCCA
11	TraesCS6A02G194000	Proton_antipo_M domain-containing protein	S96 vs R96	GCTTATCTCCAGCCCGTGAA	ATCATGTTCAATCGAACTGCCG
12	TraesCS7A02G011200	S4 RNA-binding domain-containing protein	S96 vs R96	TAAGCAAGGGGAATTCCGTCA	CCTTGCAAGTGGAACAAGAAA
13	TraesCS7D02G346400	Pentatricopeptide domain	S0 vs S96	TGGCAGAATATGACCACGCT	TTCCAACGCGATTCTCGGTC
14	TraesCSU02G177800	Ribosomal protein S11/DNA directed RNA polymerase	S0 vs S96	AGGGCGGGTAGCATTTTCAA	CCTCTGGTTTAGGTGGGCAG
15	TraesCSU02G266900	ATP synthase	S0 vs S96	ATGGAGGCGGCTATTTCGAG	CGGGTGGCTAATCTCAGGAA
