# Supplementary material for: Pathogen-induced alterations in methylome during Lr48-mediated APR in wheat (Triticum aestivum L.)&nbsp;
Source: Research Square preprint supplement (doi:10.21203/rs.3.rs-336817/v1), 2021-03-23
Supplement: Supplementary file 4 [file 5d312ad9d0cd604b2ae9fde0.xls]

## Sheet: Sheet1
Supplementary Table S12. List of hypermethylated genes in S96 when compared to S0 in S0 vs S96 and their gene ontology analysis
Gene stable ID	GO term name	GO domain	GO term accession	Interpro Short Description
TraesCS1A02G195200	phosphatidylglycerol biosynthetic process	biological_process	GO:0006655	Plipid/glycerol_acylTrfase
TraesCS1A02G195200	phosphatidylglycerol biosynthetic process	biological_process	GO:0006655	G3P_O-acylTrfase_chlp
TraesCS1A02G195200	phosphatidylglycerol biosynthetic process	biological_process	GO:0006655	G3P_O-acylTrfase_N
TraesCS1A02G195200	phosphatidylglycerol biosynthetic process	biological_process	GO:0006655	GPAT_N_sf
TraesCS1A02G195200	CDP-diacylglycerol biosynthetic process	biological_process	GO:0016024	Plipid/glycerol_acylTrfase
TraesCS1A02G195200	CDP-diacylglycerol biosynthetic process	biological_process	GO:0016024	G3P_O-acylTrfase_chlp
TraesCS1A02G195200	CDP-diacylglycerol biosynthetic process	biological_process	GO:0016024	G3P_O-acylTrfase_N
TraesCS1A02G195200	CDP-diacylglycerol biosynthetic process	biological_process	GO:0016024	GPAT_N_sf
TraesCS1A02G195200	glycerophospholipid metabolic process	biological_process	GO:0006650	Plipid/glycerol_acylTrfase
TraesCS1A02G195200	glycerophospholipid metabolic process	biological_process	GO:0006650	G3P_O-acylTrfase_chlp
TraesCS1A02G195200	glycerophospholipid metabolic process	biological_process	GO:0006650	G3P_O-acylTrfase_N
TraesCS1A02G195200	glycerophospholipid metabolic process	biological_process	GO:0006650	GPAT_N_sf
TraesCS1B02G239500	transcription, DNA-templated	biological_process	GO:0006351	DNA-dir_RNA_pol_su2
TraesCS1D02G070400	ATP synthesis coupled proton transport	biological_process	GO:0015986	ATPase_F1/V1/A1_a/bsu_nucl-bd
TraesCS1D02G070400	ATP synthesis coupled proton transport	biological_process	GO:0015986	ATPase_F1/V1/A1_a/bsu_N
TraesCS1D02G070400	ATP synthesis coupled proton transport	biological_process	GO:0015986	ATP_synth_F1_asu
TraesCS1D02G070400	ATP synthesis coupled proton transport	biological_process	GO:0015986	ATP_synth_asu-like_sf
TraesCS1D02G070400	ATP synthesis coupled proton transport	biological_process	GO:0015986	P-loop_NTPase
TraesCS1D02G070400	ATP synthesis coupled proton transport	biological_process	GO:0015986	ATP_synth_F1_a
TraesCS1D02G070400	ATP synthesis coupled proton transport	biological_process	GO:0015986	ATPase_F1/V1/A1_a/bsu_N_sf
TraesCS1D02G070400	ATP metabolic process	biological_process	GO:0046034	ATPase_F1/V1/A1_a/bsu_nucl-bd
TraesCS1D02G070400	ATP metabolic process	biological_process	GO:0046034	ATPase_F1/V1/A1_a/bsu_N
TraesCS1D02G070400	ATP metabolic process	biological_process	GO:0046034	ATP_synth_F1_asu
TraesCS1D02G070400	ATP metabolic process	biological_process	GO:0046034	ATP_synth_asu-like_sf
TraesCS1D02G070400	ATP metabolic process	biological_process	GO:0046034	P-loop_NTPase
TraesCS1D02G070400	ATP metabolic process	biological_process	GO:0046034	ATP_synth_F1_a
TraesCS1D02G070400	ATP metabolic process	biological_process	GO:0046034	ATPase_F1/V1/A1_a/bsu_N_sf
TraesCS1D02G070400	proton transmembrane transport	biological_process	GO:1902600	ATPase_F1/V1/A1_a/bsu_nucl-bd
TraesCS1D02G070400	proton transmembrane transport	biological_process	GO:1902600	ATPase_F1/V1/A1_a/bsu_N
TraesCS1D02G070400	proton transmembrane transport	biological_process	GO:1902600	ATP_synth_F1_asu
TraesCS1D02G070400	proton transmembrane transport	biological_process	GO:1902600	ATP_synth_asu-like_sf
TraesCS1D02G070400	proton transmembrane transport	biological_process	GO:1902600	P-loop_NTPase
TraesCS1D02G070400	proton transmembrane transport	biological_process	GO:1902600	ATP_synth_F1_a
TraesCS1D02G070400	proton transmembrane transport	biological_process	GO:1902600	ATPase_F1/V1/A1_a/bsu_N_sf
TraesCS1D02G071300	mRNA processing	biological_process	GO:0006397	Maturase_MatK
TraesCS1D02G071300	mRNA processing	biological_process	GO:0006397	Maturase_MatK_N
TraesCS2A02G241300	translation	biological_process	GO:0006412	Ribosomal_S3_bac-typ
TraesCS2A02G241300	translation	biological_process	GO:0006412	KH_sf_prok-type
TraesCS2D02G248700	oxidation-reduction process	biological_process	GO:0055114	Ald_Oxase/Xan_DH_a/b
TraesCS2D02G248700	oxidation-reduction process	biological_process	GO:0055114	2Fe-2S_ferredoxin-type
TraesCS2D02G248700	oxidation-reduction process	biological_process	GO:0055114	Mopterin_DH_FAD-bd
TraesCS2D02G248700	oxidation-reduction process	biological_process	GO:0055114	2Fe-2S-bd
TraesCS2D02G248700	oxidation-reduction process	biological_process	GO:0055114	CO_DH_flav_C
TraesCS2D02G248700	oxidation-reduction process	biological_process	GO:0055114	2Fe2S_fd_BS
TraesCS2D02G248700	oxidation-reduction process	biological_process	GO:0055114	AldOxase/xan_DH_Mopterin-bd
TraesCS2D02G248700	oxidation-reduction process	biological_process	GO:0055114	FAD-bd_PCMH
TraesCS2D02G248700	oxidation-reduction process	biological_process	GO:0055114	Ald_Oxase/xanthine_DH
TraesCS2D02G248700	oxidation-reduction process	biological_process	GO:0055114	2Fe-2S_ferredoxin-like_sf
TraesCS2D02G248700	oxidation-reduction process	biological_process	GO:0055114	FAD-bd_PCMH-like_sf
TraesCS2D02G248700	oxidation-reduction process	biological_process	GO:0055114	CO_DH_flav_C_dom_sf
TraesCS2D02G248700	oxidation-reduction process	biological_process	GO:0055114	Ald_Oxase/Xan_DH_a/b_sf
TraesCS2D02G248700	oxidation-reduction process	biological_process	GO:0055114	2Fe-2S-bd_dom_sf
TraesCS2D02G248700	oxidation-reduction process	biological_process	GO:0055114	AldOxase/xan_DH_Mopterin-bd_sf
TraesCS2D02G248700	electron transport chain	biological_process	GO:0022900	Ald_Oxase/Xan_DH_a/b
TraesCS2D02G248700	electron transport chain	biological_process	GO:0022900	2Fe-2S_ferredoxin-type
TraesCS2D02G248700	electron transport chain	biological_process	GO:0022900	Mopterin_DH_FAD-bd
TraesCS2D02G248700	electron transport chain	biological_process	GO:0022900	2Fe-2S-bd
TraesCS2D02G248700	electron transport chain	biological_process	GO:0022900	CO_DH_flav_C
TraesCS2D02G248700	electron transport chain	biological_process	GO:0022900	2Fe2S_fd_BS
TraesCS2D02G248700	electron transport chain	biological_process	GO:0022900	AldOxase/xan_DH_Mopterin-bd
TraesCS2D02G248700	electron transport chain	biological_process	GO:0022900	FAD-bd_PCMH
TraesCS2D02G248700	electron transport chain	biological_process	GO:0022900	Ald_Oxase/xanthine_DH
TraesCS2D02G248700	electron transport chain	biological_process	GO:0022900	2Fe-2S_ferredoxin-like_sf
TraesCS2D02G248700	electron transport chain	biological_process	GO:0022900	FAD-bd_PCMH-like_sf
TraesCS2D02G248700	electron transport chain	biological_process	GO:0022900	CO_DH_flav_C_dom_sf
TraesCS2D02G248700	electron transport chain	biological_process	GO:0022900	Ald_Oxase/Xan_DH_a/b_sf
TraesCS2D02G248700	electron transport chain	biological_process	GO:0022900	2Fe-2S-bd_dom_sf
TraesCS2D02G248700	electron transport chain	biological_process	GO:0022900	AldOxase/xan_DH_Mopterin-bd_sf
TraesCS2D02G271100	translation	biological_process	GO:0006412	Ribosomal_L20
TraesCS2D02G271100	translation	biological_process	GO:0006412	Ribosomal_protein_L20_C
TraesCS2D02G584400	ATP synthesis coupled proton transport	biological_process	GO:0015986	ATPase_F1/V1/A1_a/bsu_nucl-bd
TraesCS2D02G584400	ATP synthesis coupled proton transport	biological_process	GO:0015986	AAA+_ATPase
TraesCS2D02G584400	ATP synthesis coupled proton transport	biological_process	GO:0015986	ATPase_F1/V1/A1_a/bsu_N
TraesCS2D02G584400	ATP synthesis coupled proton transport	biological_process	GO:0015986	ATP_synth_F1_bsu
TraesCS2D02G584400	ATP synthesis coupled proton transport	biological_process	GO:0015986	ATPase_a/bsu_AS
TraesCS2D02G584400	ATP synthesis coupled proton transport	biological_process	GO:0015986	ATPase_F1/V1_b/a_C
TraesCS2D02G584400	ATP synthesis coupled proton transport	biological_process	GO:0015986	P-loop_NTPase
TraesCS2D02G584400	ATP synthesis coupled proton transport	biological_process	GO:0015986	ATPase_F1/V1/A1_a/bsu_N_sf
TraesCS2D02G584400	ATP metabolic process	biological_process	GO:0046034	ATPase_F1/V1/A1_a/bsu_nucl-bd
TraesCS2D02G584400	ATP metabolic process	biological_process	GO:0046034	AAA+_ATPase
TraesCS2D02G584400	ATP metabolic process	biological_process	GO:0046034	ATPase_F1/V1/A1_a/bsu_N
TraesCS2D02G584400	ATP metabolic process	biological_process	GO:0046034	ATP_synth_F1_bsu
TraesCS2D02G584400	ATP metabolic process	biological_process	GO:0046034	ATPase_a/bsu_AS
TraesCS2D02G584400	ATP metabolic process	biological_process	GO:0046034	ATPase_F1/V1_b/a_C
TraesCS2D02G584400	ATP metabolic process	biological_process	GO:0046034	P-loop_NTPase
TraesCS2D02G584400	ATP metabolic process	biological_process	GO:0046034	ATPase_F1/V1/A1_a/bsu_N_sf
TraesCS2D02G584400	proton transmembrane transport	biological_process	GO:1902600	ATPase_F1/V1/A1_a/bsu_nucl-bd
TraesCS2D02G584400	proton transmembrane transport	biological_process	GO:1902600	AAA+_ATPase
TraesCS2D02G584400	proton transmembrane transport	biological_process	GO:1902600	ATPase_F1/V1/A1_a/bsu_N
TraesCS2D02G584400	proton transmembrane transport	biological_process	GO:1902600	ATP_synth_F1_bsu
TraesCS2D02G584400	proton transmembrane transport	biological_process	GO:1902600	ATPase_a/bsu_AS
TraesCS2D02G584400	proton transmembrane transport	biological_process	GO:1902600	ATPase_F1/V1_b/a_C
TraesCS2D02G584400	proton transmembrane transport	biological_process	GO:1902600	P-loop_NTPase
TraesCS2D02G584400	proton transmembrane transport	biological_process	GO:1902600	ATPase_F1/V1/A1_a/bsu_N_sf
TraesCS2D02G584400	ATP synthesis coupled proton transport	biological_process	GO:0015986	ATP_synth_F1_dsu/esu
TraesCS2D02G584400	ATP synthesis coupled proton transport	biological_process	GO:0015986	ATP_synth_F1_dsu/esu_N
TraesCS2D02G584400	ATP synthesis coupled proton transport	biological_process	GO:0015986	ATPsynth_dsu/esu_N
TraesCS3B02G186300	photosynthesis	biological_process	GO:0015979	PSI_Ycf4_assembly
TraesCS4D02G076600	biosynthetic process	biological_process	GO:0009058	Aminotransferase_I/II
TraesCS4D02G076600	biosynthetic process	biological_process	GO:0009058	PyrdxlP-dep_Trfase_major
TraesCS4D02G076600	biosynthetic process	biological_process	GO:0009058	PyrdxlP-dep_Trfase_dom1
TraesCS4D02G076600	biosynthetic process	biological_process	GO:0009058	PyrdxlP-dep_Trfase
TraesCS4D02G076600	biosynthetic process	biological_process	GO:0009058	Methyltranfer_dom
TraesCS4D02G076600	biosynthetic process	biological_process	GO:0009058	Met_S-MeTrfase
TraesCS4D02G076600	biosynthetic process	biological_process	GO:0009058	SAM-dependent_MTases
TraesCS5A02G436500	translation	biological_process	GO:0006412	Ribosomal_S19
TraesCS5A02G436500	translation	biological_process	GO:0006412	Ribosomal_S19_CS
TraesCS5A02G436500	translation	biological_process	GO:0006412	Ribosomal_S19_SF
TraesCS5B02G380100	photosynthesis	biological_process	GO:0015979	PSII_PsbL
TraesCS5B02G380100	photosynthesis	biological_process	GO:0015979	PSII_PsbL_sf
TraesCS5D02G221600	respiratory electron transport chain	biological_process	GO:0022904	Cyt_b/b6_N
TraesCS5D02G221600	respiratory electron transport chain	biological_process	GO:0022904	Di-haem_cyt_TM
TraesCS5D02G221600	respiratory electron transport chain	biological_process	GO:0022904	Cyt_B6_PetB
TraesCS5D02G221600	respiratory electron transport chain	biological_process	GO:0022904	Cytb/b6-like_sf
TraesCS6A02G194000	transcription, DNA-templated	biological_process	GO:0006351	Ribosomal_S11
TraesCS6A02G194000	transcription, DNA-templated	biological_process	GO:0006351	RNAP_asu_C
TraesCS6A02G194000	transcription, DNA-templated	biological_process	GO:0006351	DNA-dir_RNA_pol_insert
TraesCS6A02G194000	transcription, DNA-templated	biological_process	GO:0006351	DNA-dir_RNA_pol_RpoA/D/Rpb3
TraesCS6A02G194000	transcription, DNA-templated	biological_process	GO:0006351	DNA-dir_RpoA
TraesCS6A02G194000	transcription, DNA-templated	biological_process	GO:0006351	RBP11-like
TraesCS6A02G194000	transcription, DNA-templated	biological_process	GO:0006351	RNApol_insert_sf
TraesCS6A02G194000	transcription, DNA-templated	biological_process	GO:0006351	Ribosomal_S11_sf
TraesCS6A02G194000	translation	biological_process	GO:0006412	Ribosomal_S11
TraesCS6A02G194000	translation	biological_process	GO:0006412	RNAP_asu_C
TraesCS6A02G194000	translation	biological_process	GO:0006412	DNA-dir_RNA_pol_insert
TraesCS6A02G194000	translation	biological_process	GO:0006412	DNA-dir_RNA_pol_RpoA/D/Rpb3
TraesCS6A02G194000	translation	biological_process	GO:0006412	DNA-dir_RpoA
TraesCS6A02G194000	translation	biological_process	GO:0006412	RBP11-like
TraesCS6A02G194000	translation	biological_process	GO:0006412	RNApol_insert_sf
TraesCS6A02G194000	translation	biological_process	GO:0006412	Ribosomal_S11_sf
TraesCS6A02G194300	translation	biological_process	GO:0006412	Ribosomal_L16
TraesCS6A02G194300	translation	biological_process	GO:0006412	Ribosomal_L10e/L16
TraesCS6A02G194300	translation	biological_process	GO:0006412	Ribosomal_L16_CS
TraesCS6A02G194300	translation	biological_process	GO:0006412	Ribosomal_L10e/L16_sf
TraesCS6D02G158700	oxidation-reduction process	biological_process	GO:0055114	ND/Mrp_mem
TraesCS6D02G158700	oxidation-reduction process	biological_process	GO:0055114	NADH-Q_OxRdtase_suN/2
TraesCS6D02G158700	ATP synthesis coupled electron transport	biological_process	GO:0042773	ND/Mrp_mem
TraesCS6D02G158700	ATP synthesis coupled electron transport	biological_process	GO:0042773	NADH-Q_OxRdtase_suN/2
TraesCS6D02G375700	recognition of pollen	biological_process	GO:0048544	Prot_kinase_dom
TraesCS6D02G375700	recognition of pollen	biological_process	GO:0048544	S_locus_glycoprot_dom
TraesCS6D02G375700	recognition of pollen	biological_process	GO:0048544	Ser-Thr/Tyr_kinase_cat_dom
TraesCS6D02G375700	recognition of pollen	biological_process	GO:0048544	Bulb-type_lectin_dom
TraesCS6D02G375700	recognition of pollen	biological_process	GO:0048544	Pan_app
TraesCS6D02G375700	recognition of pollen	biological_process	GO:0048544	Ser/Thr_kinase_AS
TraesCS6D02G375700	recognition of pollen	biological_process	GO:0048544	Kinase-like_dom_sf
TraesCS6D02G375700	recognition of pollen	biological_process	GO:0048544	Protein_kinase_ATP_BS
TraesCS6D02G375700	recognition of pollen	biological_process	GO:0048544	SRK-like_kinase
TraesCS6D02G375700	recognition of pollen	biological_process	GO:0048544	Bulb-type_lectin_dom_sf
TraesCS6D02G375700	protein phosphorylation	biological_process	GO:0006468	Prot_kinase_dom
TraesCS6D02G375700	protein phosphorylation	biological_process	GO:0006468	S_locus_glycoprot_dom
TraesCS6D02G375700	protein phosphorylation	biological_process	GO:0006468	Ser-Thr/Tyr_kinase_cat_dom
TraesCS6D02G375700	protein phosphorylation	biological_process	GO:0006468	Bulb-type_lectin_dom
TraesCS6D02G375700	protein phosphorylation	biological_process	GO:0006468	Pan_app
TraesCS6D02G375700	protein phosphorylation	biological_process	GO:0006468	Ser/Thr_kinase_AS
TraesCS6D02G375700	protein phosphorylation	biological_process	GO:0006468	Kinase-like_dom_sf
TraesCS6D02G375700	protein phosphorylation	biological_process	GO:0006468	Protein_kinase_ATP_BS
TraesCS6D02G375700	protein phosphorylation	biological_process	GO:0006468	SRK-like_kinase
TraesCS6D02G375700	protein phosphorylation	biological_process	GO:0006468	Bulb-type_lectin_dom_sf
TraesCS7A02G130300	transmembrane transport	biological_process	GO:0055085	MATE_fam
TraesCS7B02G070100	phospholipid biosynthetic process	biological_process	GO:0008654	CDP-OH_P_trans
TraesCS7B02G070100	phospholipid biosynthetic process	biological_process	GO:0008654	CHOPT
TraesCSU02G156600	protein phosphorylation	biological_process	GO:0006468	Prot_kinase_dom
TraesCSU02G156600	protein phosphorylation	biological_process	GO:0006468	GNK2
TraesCSU02G156600	protein phosphorylation	biological_process	GO:0006468	Ser/Thr_kinase_AS
TraesCSU02G156600	protein phosphorylation	biological_process	GO:0006468	Kinase-like_dom_sf
TraesCSU02G156600	protein phosphorylation	biological_process	GO:0006468	Protein_kinase_ATP_BS
TraesCSU02G156600	protein phosphorylation	biological_process	GO:0006468	GNK2_sf
TraesCS1A02G195200	chloroplast stroma	cellular_component	GO:0009570	Plipid/glycerol_acylTrfase
TraesCS1A02G195200	chloroplast stroma	cellular_component	GO:0009570	G3P_O-acylTrfase_chlp
TraesCS1A02G195200	chloroplast stroma	cellular_component	GO:0009570	G3P_O-acylTrfase_N
TraesCS1A02G195200	chloroplast stroma	cellular_component	GO:0009570	GPAT_N_sf
TraesCS1B02G239500	chloroplast	cellular_component	GO:0009507	DNA-dir_RNA_pol_su2
TraesCS1B02G239500	plastid	cellular_component	GO:0009536	DNA-dir_RNA_pol_su2
TraesCS1D02G070400	proton-transporting ATP synthase complex, catalytic core F(1)	cellular_component	GO:0045261	ATPase_F1/V1/A1_a/bsu_nucl-bd
TraesCS1D02G070400	proton-transporting ATP synthase complex, catalytic core F(1)	cellular_component	GO:0045261	ATPase_F1/V1/A1_a/bsu_N
TraesCS1D02G070400	proton-transporting ATP synthase complex, catalytic core F(1)	cellular_component	GO:0045261	ATP_synth_F1_asu
TraesCS1D02G070400	proton-transporting ATP synthase complex, catalytic core F(1)	cellular_component	GO:0045261	ATP_synth_asu-like_sf
TraesCS1D02G070400	proton-transporting ATP synthase complex, catalytic core F(1)	cellular_component	GO:0045261	P-loop_NTPase
TraesCS1D02G070400	proton-transporting ATP synthase complex, catalytic core F(1)	cellular_component	GO:0045261	ATP_synth_F1_a
TraesCS1D02G070400	proton-transporting ATP synthase complex, catalytic core F(1)	cellular_component	GO:0045261	ATPase_F1/V1/A1_a/bsu_N_sf
TraesCS1D02G071300	chloroplast	cellular_component	GO:0009507	Maturase_MatK
TraesCS1D02G071300	chloroplast	cellular_component	GO:0009507	Maturase_MatK_N
TraesCS2A02G241300	chloroplast	cellular_component	GO:0009507	Ribosomal_S3_bac-typ
TraesCS2A02G241300	chloroplast	cellular_component	GO:0009507	KH_sf_prok-type
TraesCS2A02G241300	plastid	cellular_component	GO:0009536	Ribosomal_S3_bac-typ
TraesCS2A02G241300	plastid	cellular_component	GO:0009536	KH_sf_prok-type
TraesCS2A02G241300	ribosome	cellular_component	GO:0005840	Ribosomal_S3_bac-typ
TraesCS2A02G241300	ribosome	cellular_component	GO:0005840	KH_sf_prok-type
TraesCS2D02G271100	ribosome	cellular_component	GO:0005840	Ribosomal_L20
TraesCS2D02G271100	ribosome	cellular_component	GO:0005840	Ribosomal_protein_L20_C
TraesCS2D02G584400	proton-transporting ATP synthase complex, catalytic core F(1)	cellular_component	GO:0045261	ATPase_F1/V1/A1_a/bsu_nucl-bd
TraesCS2D02G584400	proton-transporting ATP synthase complex, catalytic core F(1)	cellular_component	GO:0045261	AAA+_ATPase
TraesCS2D02G584400	proton-transporting ATP synthase complex, catalytic core F(1)	cellular_component	GO:0045261	ATPase_F1/V1/A1_a/bsu_N
TraesCS2D02G584400	proton-transporting ATP synthase complex, catalytic core F(1)	cellular_component	GO:0045261	ATP_synth_F1_bsu
TraesCS2D02G584400	proton-transporting ATP synthase complex, catalytic core F(1)	cellular_component	GO:0045261	ATPase_a/bsu_AS
TraesCS2D02G584400	proton-transporting ATP synthase complex, catalytic core F(1)	cellular_component	GO:0045261	ATPase_F1/V1_b/a_C
TraesCS2D02G584400	proton-transporting ATP synthase complex, catalytic core F(1)	cellular_component	GO:0045261	P-loop_NTPase
TraesCS2D02G584400	proton-transporting ATP synthase complex, catalytic core F(1)	cellular_component	GO:0045261	ATPase_F1/V1/A1_a/bsu_N_sf
TraesCS2D02G584400	proton-transporting ATP synthase complex, catalytic core F(1)	cellular_component	GO:0045261	ATP_synth_F1_dsu/esu
TraesCS2D02G584400	proton-transporting ATP synthase complex, catalytic core F(1)	cellular_component	GO:0045261	ATP_synth_F1_dsu/esu_N
TraesCS2D02G584400	proton-transporting ATP synthase complex, catalytic core F(1)	cellular_component	GO:0045261	ATPsynth_dsu/esu_N
TraesCS3B02G186300	integral component of membrane	cellular_component	GO:0016021	PSI_Ycf4_assembly
TraesCS3B02G186300	thylakoid	cellular_component	GO:0009579	PSI_Ycf4_assembly
TraesCS3B02G186300	photosystem I	cellular_component	GO:0009522	PSI_Ycf4_assembly
TraesCS3B02G186300	membrane	cellular_component	GO:0016020	PSI_Ycf4_assembly
TraesCS5A02G436500	ribosome	cellular_component	GO:0005840	Ribosomal_S19
TraesCS5A02G436500	ribosome	cellular_component	GO:0005840	Ribosomal_S19_CS
TraesCS5A02G436500	ribosome	cellular_component	GO:0005840	Ribosomal_S19_SF
TraesCS5B02G380100	integral component of membrane	cellular_component	GO:0016021	PSII_PsbL
TraesCS5B02G380100	integral component of membrane	cellular_component	GO:0016021	PSII_PsbL_sf
TraesCS5B02G380100	chloroplast thylakoid membrane	cellular_component	GO:0009535	PSII_PsbL
TraesCS5B02G380100	chloroplast thylakoid membrane	cellular_component	GO:0009535	PSII_PsbL_sf
TraesCS5B02G380100	membrane	cellular_component	GO:0016020	PSII_PsbL
TraesCS5B02G380100	membrane	cellular_component	GO:0016020	PSII_PsbL_sf
TraesCS5B02G380100	photosystem II reaction center	cellular_component	GO:0009539	PSII_PsbL
TraesCS5B02G380100	photosystem II reaction center	cellular_component	GO:0009539	PSII_PsbL_sf
TraesCS5B02G380100	photosystem II	cellular_component	GO:0009523	PSII_PsbL
TraesCS5B02G380100	photosystem II	cellular_component	GO:0009523	PSII_PsbL_sf
TraesCS5B02G380100	chloroplast	cellular_component	GO:0009507	PSII_PsbL
TraesCS5B02G380100	chloroplast	cellular_component	GO:0009507	PSII_PsbL_sf
TraesCS5B02G380100	thylakoid	cellular_component	GO:0009579	PSII_PsbL
TraesCS5B02G380100	thylakoid	cellular_component	GO:0009579	PSII_PsbL_sf
TraesCS5B02G380100	plastid	cellular_component	GO:0009536	PSII_PsbL
TraesCS5B02G380100	plastid	cellular_component	GO:0009536	PSII_PsbL_sf
TraesCS5D02G221600	membrane	cellular_component	GO:0016020	Cyt_b/b6_N
TraesCS5D02G221600	membrane	cellular_component	GO:0016020	Di-haem_cyt_TM
TraesCS5D02G221600	membrane	cellular_component	GO:0016020	Cyt_B6_PetB
TraesCS5D02G221600	membrane	cellular_component	GO:0016020	Cytb/b6-like_sf
TraesCS6A02G194000	ribosome	cellular_component	GO:0005840	Ribosomal_S11
TraesCS6A02G194000	ribosome	cellular_component	GO:0005840	RNAP_asu_C
TraesCS6A02G194000	ribosome	cellular_component	GO:0005840	DNA-dir_RNA_pol_insert
TraesCS6A02G194000	ribosome	cellular_component	GO:0005840	DNA-dir_RNA_pol_RpoA/D/Rpb3
TraesCS6A02G194000	ribosome	cellular_component	GO:0005840	DNA-dir_RpoA
TraesCS6A02G194000	ribosome	cellular_component	GO:0005840	RBP11-like
TraesCS6A02G194000	ribosome	cellular_component	GO:0005840	RNApol_insert_sf
TraesCS6A02G194000	ribosome	cellular_component	GO:0005840	Ribosomal_S11_sf
TraesCS6A02G194000	chloroplast	cellular_component	GO:0009507	Ribosomal_S11
TraesCS6A02G194000	chloroplast	cellular_component	GO:0009507	RNAP_asu_C
TraesCS6A02G194000	chloroplast	cellular_component	GO:0009507	DNA-dir_RNA_pol_insert
TraesCS6A02G194000	chloroplast	cellular_component	GO:0009507	DNA-dir_RNA_pol_RpoA/D/Rpb3
TraesCS6A02G194000	chloroplast	cellular_component	GO:0009507	DNA-dir_RpoA
TraesCS6A02G194000	chloroplast	cellular_component	GO:0009507	RBP11-like
TraesCS6A02G194000	chloroplast	cellular_component	GO:0009507	RNApol_insert_sf
TraesCS6A02G194000	chloroplast	cellular_component	GO:0009507	Ribosomal_S11_sf
TraesCS6A02G194000	plastid	cellular_component	GO:0009536	Ribosomal_S11
TraesCS6A02G194000	plastid	cellular_component	GO:0009536	RNAP_asu_C
TraesCS6A02G194000	plastid	cellular_component	GO:0009536	DNA-dir_RNA_pol_insert
TraesCS6A02G194000	plastid	cellular_component	GO:0009536	DNA-dir_RNA_pol_RpoA/D/Rpb3
TraesCS6A02G194000	plastid	cellular_component	GO:0009536	DNA-dir_RpoA
TraesCS6A02G194000	plastid	cellular_component	GO:0009536	RBP11-like
TraesCS6A02G194000	plastid	cellular_component	GO:0009536	RNApol_insert_sf
TraesCS6A02G194000	plastid	cellular_component	GO:0009536	Ribosomal_S11_sf
TraesCS6A02G194000	cytoplasm	cellular_component	GO:0005737	Ribosomal_S11
TraesCS6A02G194000	cytoplasm	cellular_component	GO:0005737	RNAP_asu_C
TraesCS6A02G194000	cytoplasm	cellular_component	GO:0005737	DNA-dir_RNA_pol_insert
TraesCS6A02G194000	cytoplasm	cellular_component	GO:0005737	DNA-dir_RNA_pol_RpoA/D/Rpb3
TraesCS6A02G194000	cytoplasm	cellular_component	GO:0005737	DNA-dir_RpoA
TraesCS6A02G194000	cytoplasm	cellular_component	GO:0005737	RBP11-like
TraesCS6A02G194000	cytoplasm	cellular_component	GO:0005737	RNApol_insert_sf
TraesCS6A02G194000	cytoplasm	cellular_component	GO:0005737	Ribosomal_S11_sf
TraesCS6A02G194300	ribosome	cellular_component	GO:0005840	Ribosomal_L16
TraesCS6A02G194300	ribosome	cellular_component	GO:0005840	Ribosomal_L10e/L16
TraesCS6A02G194300	ribosome	cellular_component	GO:0005840	Ribosomal_L16_CS
TraesCS6A02G194300	ribosome	cellular_component	GO:0005840	Ribosomal_L10e/L16_sf
TraesCS6A02G194300	chloroplast	cellular_component	GO:0009507	Ribosomal_L16
TraesCS6A02G194300	chloroplast	cellular_component	GO:0009507	Ribosomal_L10e/L16
TraesCS6A02G194300	chloroplast	cellular_component	GO:0009507	Ribosomal_L16_CS
TraesCS6A02G194300	chloroplast	cellular_component	GO:0009507	Ribosomal_L10e/L16_sf
TraesCS6A02G194300	plastid	cellular_component	GO:0009536	Ribosomal_L16
TraesCS6A02G194300	plastid	cellular_component	GO:0009536	Ribosomal_L10e/L16
TraesCS6A02G194300	plastid	cellular_component	GO:0009536	Ribosomal_L16_CS
TraesCS6A02G194300	plastid	cellular_component	GO:0009536	Ribosomal_L10e/L16_sf
TraesCS6D02G375700	integral component of membrane	cellular_component	GO:0016021	Prot_kinase_dom
TraesCS6D02G375700	integral component of membrane	cellular_component	GO:0016021	S_locus_glycoprot_dom
TraesCS6D02G375700	integral component of membrane	cellular_component	GO:0016021	Ser-Thr/Tyr_kinase_cat_dom
TraesCS6D02G375700	integral component of membrane	cellular_component	GO:0016021	Bulb-type_lectin_dom
TraesCS6D02G375700	integral component of membrane	cellular_component	GO:0016021	Pan_app
TraesCS6D02G375700	integral component of membrane	cellular_component	GO:0016021	Ser/Thr_kinase_AS
TraesCS6D02G375700	integral component of membrane	cellular_component	GO:0016021	Kinase-like_dom_sf
TraesCS6D02G375700	integral component of membrane	cellular_component	GO:0016021	Protein_kinase_ATP_BS
TraesCS6D02G375700	integral component of membrane	cellular_component	GO:0016021	SRK-like_kinase
TraesCS6D02G375700	integral component of membrane	cellular_component	GO:0016021	Bulb-type_lectin_dom_sf
TraesCS7A02G130300	integral component of membrane	cellular_component	GO:0016021	MATE_fam
TraesCS7A02G130300	membrane	cellular_component	GO:0016020	MATE_fam
TraesCS7B02G070100	integral component of membrane	cellular_component	GO:0016021	CDP-OH_P_trans
TraesCS7B02G070100	integral component of membrane	cellular_component	GO:0016021	CHOPT
TraesCS7B02G070100	membrane	cellular_component	GO:0016020	CDP-OH_P_trans
TraesCS7B02G070100	membrane	cellular_component	GO:0016020	CHOPT
TraesCSU02G156600	integral component of membrane	cellular_component	GO:0016021	Prot_kinase_dom
TraesCSU02G156600	integral component of membrane	cellular_component	GO:0016021	GNK2
TraesCSU02G156600	integral component of membrane	cellular_component	GO:0016021	Ser/Thr_kinase_AS
TraesCSU02G156600	integral component of membrane	cellular_component	GO:0016021	Kinase-like_dom_sf
TraesCSU02G156600	integral component of membrane	cellular_component	GO:0016021	Protein_kinase_ATP_BS
TraesCSU02G156600	integral component of membrane	cellular_component	GO:0016021	GNK2_sf
TraesCSU02G156600	membrane	cellular_component	GO:0016020	Prot_kinase_dom
TraesCSU02G156600	membrane	cellular_component	GO:0016020	GNK2
TraesCSU02G156600	membrane	cellular_component	GO:0016020	Ser/Thr_kinase_AS
TraesCSU02G156600	membrane	cellular_component	GO:0016020	Kinase-like_dom_sf
TraesCSU02G156600	membrane	cellular_component	GO:0016020	Protein_kinase_ATP_BS
TraesCSU02G156600	membrane	cellular_component	GO:0016020	GNK2_sf
TraesCSU02G156600	plasma membrane	cellular_component	GO:0005886	Prot_kinase_dom
TraesCSU02G156600	plasma membrane	cellular_component	GO:0005886	GNK2
TraesCSU02G156600	plasma membrane	cellular_component	GO:0005886	Ser/Thr_kinase_AS
TraesCSU02G156600	plasma membrane	cellular_component	GO:0005886	Kinase-like_dom_sf
TraesCSU02G156600	plasma membrane	cellular_component	GO:0005886	Protein_kinase_ATP_BS
TraesCSU02G156600	plasma membrane	cellular_component	GO:0005886	GNK2_sf
TraesCS7A02G130300	GO_0015238	go	GO:0015238	MATE_fam
TraesCS1A02G062400	magnesium ion binding	molecular_function	GO:0000287	4-PPantetheinyl_Trfase_dom
TraesCS1A02G062400	magnesium ion binding	molecular_function	GO:0000287	4-PPantetheinyl_Trfase_dom_sf
TraesCS1A02G062400	holo-[acyl-carrier-protein] synthase activity	molecular_function	GO:0008897	4-PPantetheinyl_Trfase_dom
TraesCS1A02G062400	holo-[acyl-carrier-protein] synthase activity	molecular_function	GO:0008897	4-PPantetheinyl_Trfase_dom_sf
TraesCS1A02G195200	transferase activity, transferring acyl groups	molecular_function	GO:0016746	Plipid/glycerol_acylTrfase
TraesCS1A02G195200	transferase activity, transferring acyl groups	molecular_function	GO:0016746	G3P_O-acylTrfase_chlp
TraesCS1A02G195200	transferase activity, transferring acyl groups	molecular_function	GO:0016746	G3P_O-acylTrfase_N
TraesCS1A02G195200	transferase activity, transferring acyl groups	molecular_function	GO:0016746	GPAT_N_sf
TraesCS1A02G195200	sn-1-glycerol-3-phosphate C16:0-DCA-CoA acyl transferase activity	molecular_function	GO:0102420	Plipid/glycerol_acylTrfase
TraesCS1A02G195200	sn-1-glycerol-3-phosphate C16:0-DCA-CoA acyl transferase activity	molecular_function	GO:0102420	G3P_O-acylTrfase_chlp
TraesCS1A02G195200	sn-1-glycerol-3-phosphate C16:0-DCA-CoA acyl transferase activity	molecular_function	GO:0102420	G3P_O-acylTrfase_N
TraesCS1A02G195200	sn-1-glycerol-3-phosphate C16:0-DCA-CoA acyl transferase activity	molecular_function	GO:0102420	GPAT_N_sf
TraesCS1A02G195200	glycerol-3-phosphate O-acyltransferase activity	molecular_function	GO:0004366	Plipid/glycerol_acylTrfase
TraesCS1A02G195200	glycerol-3-phosphate O-acyltransferase activity	molecular_function	GO:0004366	G3P_O-acylTrfase_chlp
TraesCS1A02G195200	glycerol-3-phosphate O-acyltransferase activity	molecular_function	GO:0004366	G3P_O-acylTrfase_N
TraesCS1A02G195200	glycerol-3-phosphate O-acyltransferase activity	molecular_function	GO:0004366	GPAT_N_sf
TraesCS1B02G239500	DNA-directed 5'-3' RNA polymerase activity	molecular_function	GO:0003899	DNA-dir_RNA_pol_su2
TraesCS1B02G239500	ribonucleoside binding	molecular_function	GO:0032549	DNA-dir_RNA_pol_su2
TraesCS1B02G239500	DNA binding	molecular_function	GO:0003677	DNA-dir_RNA_pol_su2
TraesCS1B02G239500	nucleotidyltransferase activity	molecular_function	GO:0016779	DNA-dir_RNA_pol_su2
TraesCS1B02G239500	transferase activity	molecular_function	GO:0016740	DNA-dir_RNA_pol_su2
TraesCS1D02G070400	ATP binding	molecular_function	GO:0005524	ATPase_F1/V1/A1_a/bsu_nucl-bd
TraesCS1D02G070400	ATP binding	molecular_function	GO:0005524	ATPase_F1/V1/A1_a/bsu_N
TraesCS1D02G070400	ATP binding	molecular_function	GO:0005524	ATP_synth_F1_asu
TraesCS1D02G070400	ATP binding	molecular_function	GO:0005524	ATP_synth_asu-like_sf
TraesCS1D02G070400	ATP binding	molecular_function	GO:0005524	P-loop_NTPase
TraesCS1D02G070400	ATP binding	molecular_function	GO:0005524	ATP_synth_F1_a
TraesCS1D02G070400	ATP binding	molecular_function	GO:0005524	ATPase_F1/V1/A1_a/bsu_N_sf
TraesCS1D02G070400	proton-transporting ATP synthase activity, rotational mechanism	molecular_function	GO:0046933	ATPase_F1/V1/A1_a/bsu_nucl-bd
TraesCS1D02G070400	proton-transporting ATP synthase activity, rotational mechanism	molecular_function	GO:0046933	ATPase_F1/V1/A1_a/bsu_N
TraesCS1D02G070400	proton-transporting ATP synthase activity, rotational mechanism	molecular_function	GO:0046933	ATP_synth_F1_asu
TraesCS1D02G070400	proton-transporting ATP synthase activity, rotational mechanism	molecular_function	GO:0046933	ATP_synth_asu-like_sf
TraesCS1D02G070400	proton-transporting ATP synthase activity, rotational mechanism	molecular_function	GO:0046933	P-loop_NTPase
TraesCS1D02G070400	proton-transporting ATP synthase activity, rotational mechanism	molecular_function	GO:0046933	ATP_synth_F1_a
TraesCS1D02G070400	proton-transporting ATP synthase activity, rotational mechanism	molecular_function	GO:0046933	ATPase_F1/V1/A1_a/bsu_N_sf
TraesCS1D02G070400	adenyl ribonucleotide binding	molecular_function	GO:0032559	ATPase_F1/V1/A1_a/bsu_nucl-bd
TraesCS1D02G070400	adenyl ribonucleotide binding	molecular_function	GO:0032559	ATPase_F1/V1/A1_a/bsu_N
TraesCS1D02G070400	adenyl ribonucleotide binding	molecular_function	GO:0032559	ATP_synth_F1_asu
TraesCS1D02G070400	adenyl ribonucleotide binding	molecular_function	GO:0032559	ATP_synth_asu-like_sf
TraesCS1D02G070400	adenyl ribonucleotide binding	molecular_function	GO:0032559	P-loop_NTPase
TraesCS1D02G070400	adenyl ribonucleotide binding	molecular_function	GO:0032559	ATP_synth_F1_a
TraesCS1D02G070400	adenyl ribonucleotide binding	molecular_function	GO:0032559	ATPase_F1/V1/A1_a/bsu_N_sf
TraesCS2A02G241300	RNA binding	molecular_function	GO:0003723	Ribosomal_S3_bac-typ
TraesCS2A02G241300	RNA binding	molecular_function	GO:0003723	KH_sf_prok-type
TraesCS2A02G241300	structural constituent of ribosome	molecular_function	GO:0003735	Ribosomal_S3_bac-typ
TraesCS2A02G241300	structural constituent of ribosome	molecular_function	GO:0003735	KH_sf_prok-type
TraesCS2A02G477200	ADP binding	molecular_function	GO:0043531	NB-ARC
TraesCS2A02G477200	ADP binding	molecular_function	GO:0043531	P-loop_NTPase
TraesCS2A02G477200	ADP binding	molecular_function	GO:0043531	LRR_dom_sf
TraesCS2A02G477200	ADP binding	molecular_function	GO:0043531	RX-like_CC
TraesCS2A02G477200	ADP binding	molecular_function	GO:0043531	Rx_N
TraesCS2D02G248700	metal ion binding	molecular_function	GO:0046872	Ald_Oxase/Xan_DH_a/b
TraesCS2D02G248700	metal ion binding	molecular_function	GO:0046872	2Fe-2S_ferredoxin-type
TraesCS2D02G248700	metal ion binding	molecular_function	GO:0046872	Mopterin_DH_FAD-bd
TraesCS2D02G248700	metal ion binding	molecular_function	GO:0046872	2Fe-2S-bd
TraesCS2D02G248700	metal ion binding	molecular_function	GO:0046872	CO_DH_flav_C
TraesCS2D02G248700	metal ion binding	molecular_function	GO:0046872	2Fe2S_fd_BS
TraesCS2D02G248700	metal ion binding	molecular_function	GO:0046872	AldOxase/xan_DH_Mopterin-bd
TraesCS2D02G248700	metal ion binding	molecular_function	GO:0046872	FAD-bd_PCMH
TraesCS2D02G248700	metal ion binding	molecular_function	GO:0046872	Ald_Oxase/xanthine_DH
TraesCS2D02G248700	metal ion binding	molecular_function	GO:0046872	2Fe-2S_ferredoxin-like_sf
TraesCS2D02G248700	metal ion binding	molecular_function	GO:0046872	FAD-bd_PCMH-like_sf
TraesCS2D02G248700	metal ion binding	molecular_function	GO:0046872	CO_DH_flav_C_dom_sf
TraesCS2D02G248700	metal ion binding	molecular_function	GO:0046872	Ald_Oxase/Xan_DH_a/b_sf
TraesCS2D02G248700	metal ion binding	molecular_function	GO:0046872	2Fe-2S-bd_dom_sf
TraesCS2D02G248700	metal ion binding	molecular_function	GO:0046872	AldOxase/xan_DH_Mopterin-bd_sf
TraesCS2D02G248700	oxidoreductase activity	molecular_function	GO:0016491	Ald_Oxase/Xan_DH_a/b
TraesCS2D02G248700	oxidoreductase activity	molecular_function	GO:0016491	2Fe-2S_ferredoxin-type
TraesCS2D02G248700	oxidoreductase activity	molecular_function	GO:0016491	Mopterin_DH_FAD-bd
TraesCS2D02G248700	oxidoreductase activity	molecular_function	GO:0016491	2Fe-2S-bd
TraesCS2D02G248700	oxidoreductase activity	molecular_function	GO:0016491	CO_DH_flav_C
TraesCS2D02G248700	oxidoreductase activity	molecular_function	GO:0016491	2Fe2S_fd_BS
TraesCS2D02G248700	oxidoreductase activity	molecular_function	GO:0016491	AldOxase/xan_DH_Mopterin-bd
TraesCS2D02G248700	oxidoreductase activity	molecular_function	GO:0016491	FAD-bd_PCMH
TraesCS2D02G248700	oxidoreductase activity	molecular_function	GO:0016491	Ald_Oxase/xanthine_DH
TraesCS2D02G248700	oxidoreductase activity	molecular_function	GO:0016491	2Fe-2S_ferredoxin-like_sf
TraesCS2D02G248700	oxidoreductase activity	molecular_function	GO:0016491	FAD-bd_PCMH-like_sf
TraesCS2D02G248700	oxidoreductase activity	molecular_function	GO:0016491	CO_DH_flav_C_dom_sf
TraesCS2D02G248700	oxidoreductase activity	molecular_function	GO:0016491	Ald_Oxase/Xan_DH_a/b_sf
TraesCS2D02G248700	oxidoreductase activity	molecular_function	GO:0016491	2Fe-2S-bd_dom_sf
TraesCS2D02G248700	oxidoreductase activity	molecular_function	GO:0016491	AldOxase/xan_DH_Mopterin-bd_sf
TraesCS2D02G248700	iron ion binding	molecular_function	GO:0005506	Ald_Oxase/Xan_DH_a/b
TraesCS2D02G248700	iron ion binding	molecular_function	GO:0005506	2Fe-2S_ferredoxin-type
TraesCS2D02G248700	iron ion binding	molecular_function	GO:0005506	Mopterin_DH_FAD-bd
TraesCS2D02G248700	iron ion binding	molecular_function	GO:0005506	2Fe-2S-bd
TraesCS2D02G248700	iron ion binding	molecular_function	GO:0005506	CO_DH_flav_C
TraesCS2D02G248700	iron ion binding	molecular_function	GO:0005506	2Fe2S_fd_BS
TraesCS2D02G248700	iron ion binding	molecular_function	GO:0005506	AldOxase/xan_DH_Mopterin-bd
TraesCS2D02G248700	iron ion binding	molecular_function	GO:0005506	FAD-bd_PCMH
TraesCS2D02G248700	iron ion binding	molecular_function	GO:0005506	Ald_Oxase/xanthine_DH
TraesCS2D02G248700	iron ion binding	molecular_function	GO:0005506	2Fe-2S_ferredoxin-like_sf
TraesCS2D02G248700	iron ion binding	molecular_function	GO:0005506	FAD-bd_PCMH-like_sf
TraesCS2D02G248700	iron ion binding	molecular_function	GO:0005506	CO_DH_flav_C_dom_sf
TraesCS2D02G248700	iron ion binding	molecular_function	GO:0005506	Ald_Oxase/Xan_DH_a/b_sf
TraesCS2D02G248700	iron ion binding	molecular_function	GO:0005506	2Fe-2S-bd_dom_sf
TraesCS2D02G248700	iron ion binding	molecular_function	GO:0005506	AldOxase/xan_DH_Mopterin-bd_sf
TraesCS2D02G248700	electron transfer activity	molecular_function	GO:0009055	Ald_Oxase/Xan_DH_a/b
TraesCS2D02G248700	electron transfer activity	molecular_function	GO:0009055	2Fe-2S_ferredoxin-type
TraesCS2D02G248700	electron transfer activity	molecular_function	GO:0009055	Mopterin_DH_FAD-bd
TraesCS2D02G248700	electron transfer activity	molecular_function	GO:0009055	2Fe-2S-bd
TraesCS2D02G248700	electron transfer activity	molecular_function	GO:0009055	CO_DH_flav_C
TraesCS2D02G248700	electron transfer activity	molecular_function	GO:0009055	2Fe2S_fd_BS
TraesCS2D02G248700	electron transfer activity	molecular_function	GO:0009055	AldOxase/xan_DH_Mopterin-bd
TraesCS2D02G248700	electron transfer activity	molecular_function	GO:0009055	FAD-bd_PCMH
TraesCS2D02G248700	electron transfer activity	molecular_function	GO:0009055	Ald_Oxase/xanthine_DH
TraesCS2D02G248700	electron transfer activity	molecular_function	GO:0009055	2Fe-2S_ferredoxin-like_sf
TraesCS2D02G248700	electron transfer activity	molecular_function	GO:0009055	FAD-bd_PCMH-like_sf
TraesCS2D02G248700	electron transfer activity	molecular_function	GO:0009055	CO_DH_flav_C_dom_sf
TraesCS2D02G248700	electron transfer activity	molecular_function	GO:0009055	Ald_Oxase/Xan_DH_a/b_sf
TraesCS2D02G248700	electron transfer activity	molecular_function	GO:0009055	2Fe-2S-bd_dom_sf
TraesCS2D02G248700	electron transfer activity	molecular_function	GO:0009055	AldOxase/xan_DH_Mopterin-bd_sf
TraesCS2D02G248700	FAD binding	molecular_function	GO:0071949	Ald_Oxase/Xan_DH_a/b
TraesCS2D02G248700	FAD binding	molecular_function	GO:0071949	2Fe-2S_ferredoxin-type
TraesCS2D02G248700	FAD binding	molecular_function	GO:0071949	Mopterin_DH_FAD-bd
TraesCS2D02G248700	FAD binding	molecular_function	GO:0071949	2Fe-2S-bd
TraesCS2D02G248700	FAD binding	molecular_function	GO:0071949	CO_DH_flav_C
TraesCS2D02G248700	FAD binding	molecular_function	GO:0071949	2Fe2S_fd_BS
TraesCS2D02G248700	FAD binding	molecular_function	GO:0071949	AldOxase/xan_DH_Mopterin-bd
TraesCS2D02G248700	FAD binding	molecular_function	GO:0071949	FAD-bd_PCMH
TraesCS2D02G248700	FAD binding	molecular_function	GO:0071949	Ald_Oxase/xanthine_DH
TraesCS2D02G248700	FAD binding	molecular_function	GO:0071949	2Fe-2S_ferredoxin-like_sf
TraesCS2D02G248700	FAD binding	molecular_function	GO:0071949	FAD-bd_PCMH-like_sf
TraesCS2D02G248700	FAD binding	molecular_function	GO:0071949	CO_DH_flav_C_dom_sf
TraesCS2D02G248700	FAD binding	molecular_function	GO:0071949	Ald_Oxase/Xan_DH_a/b_sf
TraesCS2D02G248700	FAD binding	molecular_function	GO:0071949	2Fe-2S-bd_dom_sf
TraesCS2D02G248700	FAD binding	molecular_function	GO:0071949	AldOxase/xan_DH_Mopterin-bd_sf
TraesCS2D02G248700	2 iron, 2 sulfur cluster binding	molecular_function	GO:0051537	Ald_Oxase/Xan_DH_a/b
TraesCS2D02G248700	2 iron, 2 sulfur cluster binding	molecular_function	GO:0051537	2Fe-2S_ferredoxin-type
TraesCS2D02G248700	2 iron, 2 sulfur cluster binding	molecular_function	GO:0051537	Mopterin_DH_FAD-bd
TraesCS2D02G248700	2 iron, 2 sulfur cluster binding	molecular_function	GO:0051537	2Fe-2S-bd
TraesCS2D02G248700	2 iron, 2 sulfur cluster binding	molecular_function	GO:0051537	CO_DH_flav_C
TraesCS2D02G248700	2 iron, 2 sulfur cluster binding	molecular_function	GO:0051537	2Fe2S_fd_BS
TraesCS2D02G248700	2 iron, 2 sulfur cluster binding	molecular_function	GO:0051537	AldOxase/xan_DH_Mopterin-bd
TraesCS2D02G248700	2 iron, 2 sulfur cluster binding	molecular_function	GO:0051537	FAD-bd_PCMH
TraesCS2D02G248700	2 iron, 2 sulfur cluster binding	molecular_function	GO:0051537	Ald_Oxase/xanthine_DH
TraesCS2D02G248700	2 iron, 2 sulfur cluster binding	molecular_function	GO:0051537	2Fe-2S_ferredoxin-like_sf
TraesCS2D02G248700	2 iron, 2 sulfur cluster binding	molecular_function	GO:0051537	FAD-bd_PCMH-like_sf
TraesCS2D02G248700	2 iron, 2 sulfur cluster binding	molecular_function	GO:0051537	CO_DH_flav_C_dom_sf
TraesCS2D02G248700	2 iron, 2 sulfur cluster binding	molecular_function	GO:0051537	Ald_Oxase/Xan_DH_a/b_sf
TraesCS2D02G248700	2 iron, 2 sulfur cluster binding	molecular_function	GO:0051537	2Fe-2S-bd_dom_sf
TraesCS2D02G248700	2 iron, 2 sulfur cluster binding	molecular_function	GO:0051537	AldOxase/xan_DH_Mopterin-bd_sf
TraesCS2D02G248700	iron-sulfur cluster binding	molecular_function	GO:0051536	Ald_Oxase/Xan_DH_a/b
TraesCS2D02G248700	iron-sulfur cluster binding	molecular_function	GO:0051536	2Fe-2S_ferredoxin-type
TraesCS2D02G248700	iron-sulfur cluster binding	molecular_function	GO:0051536	Mopterin_DH_FAD-bd
TraesCS2D02G248700	iron-sulfur cluster binding	molecular_function	GO:0051536	2Fe-2S-bd
TraesCS2D02G248700	iron-sulfur cluster binding	molecular_function	GO:0051536	CO_DH_flav_C
TraesCS2D02G248700	iron-sulfur cluster binding	molecular_function	GO:0051536	2Fe2S_fd_BS
TraesCS2D02G248700	iron-sulfur cluster binding	molecular_function	GO:0051536	AldOxase/xan_DH_Mopterin-bd
TraesCS2D02G248700	iron-sulfur cluster binding	molecular_function	GO:0051536	FAD-bd_PCMH
TraesCS2D02G248700	iron-sulfur cluster binding	molecular_function	GO:0051536	Ald_Oxase/xanthine_DH
TraesCS2D02G248700	iron-sulfur cluster binding	molecular_function	GO:0051536	2Fe-2S_ferredoxin-like_sf
TraesCS2D02G248700	iron-sulfur cluster binding	molecular_function	GO:0051536	FAD-bd_PCMH-like_sf
TraesCS2D02G248700	iron-sulfur cluster binding	molecular_function	GO:0051536	CO_DH_flav_C_dom_sf
TraesCS2D02G248700	iron-sulfur cluster binding	molecular_function	GO:0051536	Ald_Oxase/Xan_DH_a/b_sf
TraesCS2D02G248700	iron-sulfur cluster binding	molecular_function	GO:0051536	2Fe-2S-bd_dom_sf
TraesCS2D02G248700	iron-sulfur cluster binding	molecular_function	GO:0051536	AldOxase/xan_DH_Mopterin-bd_sf
TraesCS2D02G248700	flavin adenine dinucleotide binding	molecular_function	GO:0050660	Ald_Oxase/Xan_DH_a/b
TraesCS2D02G248700	flavin adenine dinucleotide binding	molecular_function	GO:0050660	2Fe-2S_ferredoxin-type
TraesCS2D02G248700	flavin adenine dinucleotide binding	molecular_function	GO:0050660	Mopterin_DH_FAD-bd
TraesCS2D02G248700	flavin adenine dinucleotide binding	molecular_function	GO:0050660	2Fe-2S-bd
TraesCS2D02G248700	flavin adenine dinucleotide binding	molecular_function	GO:0050660	CO_DH_flav_C
TraesCS2D02G248700	flavin adenine dinucleotide binding	molecular_function	GO:0050660	2Fe2S_fd_BS
TraesCS2D02G248700	flavin adenine dinucleotide binding	molecular_function	GO:0050660	AldOxase/xan_DH_Mopterin-bd
TraesCS2D02G248700	flavin adenine dinucleotide binding	molecular_function	GO:0050660	FAD-bd_PCMH
TraesCS2D02G248700	flavin adenine dinucleotide binding	molecular_function	GO:0050660	Ald_Oxase/xanthine_DH
TraesCS2D02G248700	flavin adenine dinucleotide binding	molecular_function	GO:0050660	2Fe-2S_ferredoxin-like_sf
TraesCS2D02G248700	flavin adenine dinucleotide binding	molecular_function	GO:0050660	FAD-bd_PCMH-like_sf
TraesCS2D02G248700	flavin adenine dinucleotide binding	molecular_function	GO:0050660	CO_DH_flav_C_dom_sf
TraesCS2D02G248700	flavin adenine dinucleotide binding	molecular_function	GO:0050660	Ald_Oxase/Xan_DH_a/b_sf
TraesCS2D02G248700	flavin adenine dinucleotide binding	molecular_function	GO:0050660	2Fe-2S-bd_dom_sf
TraesCS2D02G248700	flavin adenine dinucleotide binding	molecular_function	GO:0050660	AldOxase/xan_DH_Mopterin-bd_sf
TraesCS2D02G271100	structural constituent of ribosome	molecular_function	GO:0003735	Ribosomal_L20
TraesCS2D02G271100	structural constituent of ribosome	molecular_function	GO:0003735	Ribosomal_protein_L20_C
TraesCS2D02G271100	rRNA binding	molecular_function	GO:0019843	Ribosomal_L20
TraesCS2D02G271100	rRNA binding	molecular_function	GO:0019843	Ribosomal_protein_L20_C
TraesCS2D02G584400	ATP binding	molecular_function	GO:0005524	ATPase_F1/V1/A1_a/bsu_nucl-bd
TraesCS2D02G584400	ATP binding	molecular_function	GO:0005524	AAA+_ATPase
TraesCS2D02G584400	ATP binding	molecular_function	GO:0005524	ATPase_F1/V1/A1_a/bsu_N
TraesCS2D02G584400	ATP binding	molecular_function	GO:0005524	ATP_synth_F1_bsu
TraesCS2D02G584400	ATP binding	molecular_function	GO:0005524	ATPase_a/bsu_AS
TraesCS2D02G584400	ATP binding	molecular_function	GO:0005524	ATPase_F1/V1_b/a_C
TraesCS2D02G584400	ATP binding	molecular_function	GO:0005524	P-loop_NTPase
TraesCS2D02G584400	ATP binding	molecular_function	GO:0005524	ATPase_F1/V1/A1_a/bsu_N_sf
TraesCS2D02G584400	proton-transporting ATP synthase activity, rotational mechanism	molecular_function	GO:0046933	ATPase_F1/V1/A1_a/bsu_nucl-bd
TraesCS2D02G584400	proton-transporting ATP synthase activity, rotational mechanism	molecular_function	GO:0046933	AAA+_ATPase
TraesCS2D02G584400	proton-transporting ATP synthase activity, rotational mechanism	molecular_function	GO:0046933	ATPase_F1/V1/A1_a/bsu_N
TraesCS2D02G584400	proton-transporting ATP synthase activity, rotational mechanism	molecular_function	GO:0046933	ATP_synth_F1_bsu
TraesCS2D02G584400	proton-transporting ATP synthase activity, rotational mechanism	molecular_function	GO:0046933	ATPase_a/bsu_AS
TraesCS2D02G584400	proton-transporting ATP synthase activity, rotational mechanism	molecular_function	GO:0046933	ATPase_F1/V1_b/a_C
TraesCS2D02G584400	proton-transporting ATP synthase activity, rotational mechanism	molecular_function	GO:0046933	P-loop_NTPase
TraesCS2D02G584400	proton-transporting ATP synthase activity, rotational mechanism	molecular_function	GO:0046933	ATPase_F1/V1/A1_a/bsu_N_sf
TraesCS2D02G584400	proton-transporting ATP synthase activity, rotational mechanism	molecular_function	GO:0046933	ATP_synth_F1_dsu/esu
TraesCS2D02G584400	proton-transporting ATP synthase activity, rotational mechanism	molecular_function	GO:0046933	ATP_synth_F1_dsu/esu_N
TraesCS2D02G584400	proton-transporting ATP synthase activity, rotational mechanism	molecular_function	GO:0046933	ATPsynth_dsu/esu_N
TraesCS4D02G076600	pyridoxal phosphate binding	molecular_function	GO:0030170	Aminotransferase_I/II
TraesCS4D02G076600	pyridoxal phosphate binding	molecular_function	GO:0030170	PyrdxlP-dep_Trfase_major
TraesCS4D02G076600	pyridoxal phosphate binding	molecular_function	GO:0030170	PyrdxlP-dep_Trfase_dom1
TraesCS4D02G076600	pyridoxal phosphate binding	molecular_function	GO:0030170	PyrdxlP-dep_Trfase
TraesCS4D02G076600	pyridoxal phosphate binding	molecular_function	GO:0030170	Methyltranfer_dom
TraesCS4D02G076600	pyridoxal phosphate binding	molecular_function	GO:0030170	Met_S-MeTrfase
TraesCS4D02G076600	pyridoxal phosphate binding	molecular_function	GO:0030170	SAM-dependent_MTases
TraesCS4D02G076600	catalytic activity	molecular_function	GO:0003824	Aminotransferase_I/II
TraesCS4D02G076600	catalytic activity	molecular_function	GO:0003824	PyrdxlP-dep_Trfase_major
TraesCS4D02G076600	catalytic activity	molecular_function	GO:0003824	PyrdxlP-dep_Trfase_dom1
TraesCS4D02G076600	catalytic activity	molecular_function	GO:0003824	PyrdxlP-dep_Trfase
TraesCS4D02G076600	catalytic activity	molecular_function	GO:0003824	Methyltranfer_dom
TraesCS4D02G076600	catalytic activity	molecular_function	GO:0003824	Met_S-MeTrfase
TraesCS4D02G076600	catalytic activity	molecular_function	GO:0003824	SAM-dependent_MTases
TraesCS4D02G076600	methyltransferase activity	molecular_function	GO:0008168	Aminotransferase_I/II
TraesCS4D02G076600	methyltransferase activity	molecular_function	GO:0008168	PyrdxlP-dep_Trfase_major
TraesCS4D02G076600	methyltransferase activity	molecular_function	GO:0008168	PyrdxlP-dep_Trfase_dom1
TraesCS4D02G076600	methyltransferase activity	molecular_function	GO:0008168	PyrdxlP-dep_Trfase
TraesCS4D02G076600	methyltransferase activity	molecular_function	GO:0008168	Methyltranfer_dom
TraesCS4D02G076600	methyltransferase activity	molecular_function	GO:0008168	Met_S-MeTrfase
TraesCS4D02G076600	methyltransferase activity	molecular_function	GO:0008168	SAM-dependent_MTases
TraesCS5A02G436500	RNA binding	molecular_function	GO:0003723	Ribosomal_S19
TraesCS5A02G436500	RNA binding	molecular_function	GO:0003723	Ribosomal_S19_CS
TraesCS5A02G436500	RNA binding	molecular_function	GO:0003723	Ribosomal_S19_SF
TraesCS5A02G436500	structural constituent of ribosome	molecular_function	GO:0003735	Ribosomal_S19
TraesCS5A02G436500	structural constituent of ribosome	molecular_function	GO:0003735	Ribosomal_S19_CS
TraesCS5A02G436500	structural constituent of ribosome	molecular_function	GO:0003735	Ribosomal_S19_SF
TraesCS5D02G221600	oxidoreductase activity	molecular_function	GO:0016491	Cyt_b/b6_N
TraesCS5D02G221600	oxidoreductase activity	molecular_function	GO:0016491	Di-haem_cyt_TM
TraesCS5D02G221600	oxidoreductase activity	molecular_function	GO:0016491	Cyt_B6_PetB
TraesCS5D02G221600	oxidoreductase activity	molecular_function	GO:0016491	Cytb/b6-like_sf
TraesCS5D02G221600	electron transfer activity	molecular_function	GO:0009055	Cyt_b/b6_N
TraesCS5D02G221600	electron transfer activity	molecular_function	GO:0009055	Di-haem_cyt_TM
TraesCS5D02G221600	electron transfer activity	molecular_function	GO:0009055	Cyt_B6_PetB
TraesCS5D02G221600	electron transfer activity	molecular_function	GO:0009055	Cytb/b6-like_sf
TraesCS6A02G194000	DNA binding	molecular_function	GO:0003677	Ribosomal_S11
TraesCS6A02G194000	DNA binding	molecular_function	GO:0003677	RNAP_asu_C
TraesCS6A02G194000	DNA binding	molecular_function	GO:0003677	DNA-dir_RNA_pol_insert
TraesCS6A02G194000	DNA binding	molecular_function	GO:0003677	DNA-dir_RNA_pol_RpoA/D/Rpb3
TraesCS6A02G194000	DNA binding	molecular_function	GO:0003677	DNA-dir_RpoA
TraesCS6A02G194000	DNA binding	molecular_function	GO:0003677	RBP11-like
TraesCS6A02G194000	DNA binding	molecular_function	GO:0003677	RNApol_insert_sf
TraesCS6A02G194000	DNA binding	molecular_function	GO:0003677	Ribosomal_S11_sf
TraesCS6A02G194000	structural constituent of ribosome	molecular_function	GO:0003735	Ribosomal_S11
TraesCS6A02G194000	structural constituent of ribosome	molecular_function	GO:0003735	RNAP_asu_C
TraesCS6A02G194000	structural constituent of ribosome	molecular_function	GO:0003735	DNA-dir_RNA_pol_insert
TraesCS6A02G194000	structural constituent of ribosome	molecular_function	GO:0003735	DNA-dir_RNA_pol_RpoA/D/Rpb3
TraesCS6A02G194000	structural constituent of ribosome	molecular_function	GO:0003735	DNA-dir_RpoA
TraesCS6A02G194000	structural constituent of ribosome	molecular_function	GO:0003735	RBP11-like
TraesCS6A02G194000	structural constituent of ribosome	molecular_function	GO:0003735	RNApol_insert_sf
TraesCS6A02G194000	structural constituent of ribosome	molecular_function	GO:0003735	Ribosomal_S11_sf
TraesCS6A02G194000	protein dimerization activity	molecular_function	GO:0046983	Ribosomal_S11
TraesCS6A02G194000	protein dimerization activity	molecular_function	GO:0046983	RNAP_asu_C
TraesCS6A02G194000	protein dimerization activity	molecular_function	GO:0046983	DNA-dir_RNA_pol_insert
TraesCS6A02G194000	protein dimerization activity	molecular_function	GO:0046983	DNA-dir_RNA_pol_RpoA/D/Rpb3
TraesCS6A02G194000	protein dimerization activity	molecular_function	GO:0046983	DNA-dir_RpoA
TraesCS6A02G194000	protein dimerization activity	molecular_function	GO:0046983	RBP11-like
TraesCS6A02G194000	protein dimerization activity	molecular_function	GO:0046983	RNApol_insert_sf
TraesCS6A02G194000	protein dimerization activity	molecular_function	GO:0046983	Ribosomal_S11_sf
TraesCS6A02G194000	DNA-directed 5'-3' RNA polymerase activity	molecular_function	GO:0003899	Ribosomal_S11
TraesCS6A02G194000	DNA-directed 5'-3' RNA polymerase activity	molecular_function	GO:0003899	RNAP_asu_C
TraesCS6A02G194000	DNA-directed 5'-3' RNA polymerase activity	molecular_function	GO:0003899	DNA-dir_RNA_pol_insert
TraesCS6A02G194000	DNA-directed 5'-3' RNA polymerase activity	molecular_function	GO:0003899	DNA-dir_RNA_pol_RpoA/D/Rpb3
TraesCS6A02G194000	DNA-directed 5'-3' RNA polymerase activity	molecular_function	GO:0003899	DNA-dir_RpoA
TraesCS6A02G194000	DNA-directed 5'-3' RNA polymerase activity	molecular_function	GO:0003899	RBP11-like
TraesCS6A02G194000	DNA-directed 5'-3' RNA polymerase activity	molecular_function	GO:0003899	RNApol_insert_sf
TraesCS6A02G194000	DNA-directed 5'-3' RNA polymerase activity	molecular_function	GO:0003899	Ribosomal_S11_sf
TraesCS6A02G194000	nucleotidyltransferase activity	molecular_function	GO:0016779	Ribosomal_S11
TraesCS6A02G194000	nucleotidyltransferase activity	molecular_function	GO:0016779	RNAP_asu_C
TraesCS6A02G194000	nucleotidyltransferase activity	molecular_function	GO:0016779	DNA-dir_RNA_pol_insert
TraesCS6A02G194000	nucleotidyltransferase activity	molecular_function	GO:0016779	DNA-dir_RNA_pol_RpoA/D/Rpb3
TraesCS6A02G194000	nucleotidyltransferase activity	molecular_function	GO:0016779	DNA-dir_RpoA
TraesCS6A02G194000	nucleotidyltransferase activity	molecular_function	GO:0016779	RBP11-like
TraesCS6A02G194000	nucleotidyltransferase activity	molecular_function	GO:0016779	RNApol_insert_sf
TraesCS6A02G194000	nucleotidyltransferase activity	molecular_function	GO:0016779	Ribosomal_S11_sf
TraesCS6A02G194000	transferase activity	molecular_function	GO:0016740	Ribosomal_S11
TraesCS6A02G194000	transferase activity	molecular_function	GO:0016740	RNAP_asu_C
TraesCS6A02G194000	transferase activity	molecular_function	GO:0016740	DNA-dir_RNA_pol_insert
TraesCS6A02G194000	transferase activity	molecular_function	GO:0016740	DNA-dir_RNA_pol_RpoA/D/Rpb3
TraesCS6A02G194000	transferase activity	molecular_function	GO:0016740	DNA-dir_RpoA
TraesCS6A02G194000	transferase activity	molecular_function	GO:0016740	RBP11-like
TraesCS6A02G194000	transferase activity	molecular_function	GO:0016740	RNApol_insert_sf
TraesCS6A02G194000	transferase activity	molecular_function	GO:0016740	Ribosomal_S11_sf
TraesCS6A02G194300	structural constituent of ribosome	molecular_function	GO:0003735	Ribosomal_L16
TraesCS6A02G194300	structural constituent of ribosome	molecular_function	GO:0003735	Ribosomal_L10e/L16
TraesCS6A02G194300	structural constituent of ribosome	molecular_function	GO:0003735	Ribosomal_L16_CS
TraesCS6A02G194300	structural constituent of ribosome	molecular_function	GO:0003735	Ribosomal_L10e/L16_sf
TraesCS6A02G194300	rRNA binding	molecular_function	GO:0019843	Ribosomal_L16
TraesCS6A02G194300	rRNA binding	molecular_function	GO:0019843	Ribosomal_L10e/L16
TraesCS6A02G194300	rRNA binding	molecular_function	GO:0019843	Ribosomal_L16_CS
TraesCS6A02G194300	rRNA binding	molecular_function	GO:0019843	Ribosomal_L10e/L16_sf
TraesCS6D02G158700	NADH dehydrogenase (ubiquinone) activity	molecular_function	GO:0008137	ND/Mrp_mem
TraesCS6D02G158700	NADH dehydrogenase (ubiquinone) activity	molecular_function	GO:0008137	NADH-Q_OxRdtase_suN/2
TraesCS6D02G375700	ATP binding	molecular_function	GO:0005524	Prot_kinase_dom
TraesCS6D02G375700	ATP binding	molecular_function	GO:0005524	S_locus_glycoprot_dom
TraesCS6D02G375700	ATP binding	molecular_function	GO:0005524	Ser-Thr/Tyr_kinase_cat_dom
TraesCS6D02G375700	ATP binding	molecular_function	GO:0005524	Bulb-type_lectin_dom
TraesCS6D02G375700	ATP binding	molecular_function	GO:0005524	Pan_app
TraesCS6D02G375700	ATP binding	molecular_function	GO:0005524	Ser/Thr_kinase_AS
TraesCS6D02G375700	ATP binding	molecular_function	GO:0005524	Kinase-like_dom_sf
TraesCS6D02G375700	ATP binding	molecular_function	GO:0005524	Protein_kinase_ATP_BS
TraesCS6D02G375700	ATP binding	molecular_function	GO:0005524	SRK-like_kinase
TraesCS6D02G375700	ATP binding	molecular_function	GO:0005524	Bulb-type_lectin_dom_sf
TraesCS6D02G375700	protein kinase activity	molecular_function	GO:0004672	Prot_kinase_dom
TraesCS6D02G375700	protein kinase activity	molecular_function	GO:0004672	S_locus_glycoprot_dom
TraesCS6D02G375700	protein kinase activity	molecular_function	GO:0004672	Ser-Thr/Tyr_kinase_cat_dom
TraesCS6D02G375700	protein kinase activity	molecular_function	GO:0004672	Bulb-type_lectin_dom
TraesCS6D02G375700	protein kinase activity	molecular_function	GO:0004672	Pan_app
TraesCS6D02G375700	protein kinase activity	molecular_function	GO:0004672	Ser/Thr_kinase_AS
TraesCS6D02G375700	protein kinase activity	molecular_function	GO:0004672	Kinase-like_dom_sf
TraesCS6D02G375700	protein kinase activity	molecular_function	GO:0004672	Protein_kinase_ATP_BS
TraesCS6D02G375700	protein kinase activity	molecular_function	GO:0004672	SRK-like_kinase
TraesCS6D02G375700	protein kinase activity	molecular_function	GO:0004672	Bulb-type_lectin_dom_sf
TraesCS6D02G375700	protein serine/threonine kinase activity	molecular_function	GO:0004674	Prot_kinase_dom
TraesCS6D02G375700	protein serine/threonine kinase activity	molecular_function	GO:0004674	S_locus_glycoprot_dom
TraesCS6D02G375700	protein serine/threonine kinase activity	molecular_function	GO:0004674	Ser-Thr/Tyr_kinase_cat_dom
TraesCS6D02G375700	protein serine/threonine kinase activity	molecular_function	GO:0004674	Bulb-type_lectin_dom
TraesCS6D02G375700	protein serine/threonine kinase activity	molecular_function	GO:0004674	Pan_app
TraesCS6D02G375700	protein serine/threonine kinase activity	molecular_function	GO:0004674	Ser/Thr_kinase_AS
TraesCS6D02G375700	protein serine/threonine kinase activity	molecular_function	GO:0004674	Kinase-like_dom_sf
TraesCS6D02G375700	protein serine/threonine kinase activity	molecular_function	GO:0004674	Protein_kinase_ATP_BS
TraesCS6D02G375700	protein serine/threonine kinase activity	molecular_function	GO:0004674	SRK-like_kinase
TraesCS6D02G375700	protein serine/threonine kinase activity	molecular_function	GO:0004674	Bulb-type_lectin_dom_sf
TraesCS7A02G130300	antiporter activity	molecular_function	GO:0015297	MATE_fam
TraesCS7A02G130300	xenobiotic transmembrane transporter activity	molecular_function	GO:0042910	MATE_fam
TraesCS7B02G070100	phosphotransferase activity, for other substituted phosphate groups	molecular_function	GO:0016780	CDP-OH_P_trans
TraesCS7B02G070100	phosphotransferase activity, for other substituted phosphate groups	molecular_function	GO:0016780	CHOPT
TraesCSU02G156600	ATP binding	molecular_function	GO:0005524	Prot_kinase_dom
TraesCSU02G156600	ATP binding	molecular_function	GO:0005524	GNK2
TraesCSU02G156600	ATP binding	molecular_function	GO:0005524	Ser/Thr_kinase_AS
TraesCSU02G156600	ATP binding	molecular_function	GO:0005524	Kinase-like_dom_sf
TraesCSU02G156600	ATP binding	molecular_function	GO:0005524	Protein_kinase_ATP_BS
TraesCSU02G156600	ATP binding	molecular_function	GO:0005524	GNK2_sf
TraesCSU02G156600	protein kinase activity	molecular_function	GO:0004672	Prot_kinase_dom
TraesCSU02G156600	protein kinase activity	molecular_function	GO:0004672	GNK2
TraesCSU02G156600	protein kinase activity	molecular_function	GO:0004672	Ser/Thr_kinase_AS
TraesCSU02G156600	protein kinase activity	molecular_function	GO:0004672	Kinase-like_dom_sf
TraesCSU02G156600	protein kinase activity	molecular_function	GO:0004672	Protein_kinase_ATP_BS
TraesCSU02G156600	protein kinase activity	molecular_function	GO:0004672	GNK2_sf
TraesCSU02G156600	protein serine/threonine kinase activity	molecular_function	GO:0004674	Prot_kinase_dom
TraesCSU02G156600	protein serine/threonine kinase activity	molecular_function	GO:0004674	GNK2
TraesCSU02G156600	protein serine/threonine kinase activity	molecular_function	GO:0004674	Ser/Thr_kinase_AS
TraesCSU02G156600	protein serine/threonine kinase activity	molecular_function	GO:0004674	Kinase-like_dom_sf
TraesCSU02G156600	protein serine/threonine kinase activity	molecular_function	GO:0004674	Protein_kinase_ATP_BS
TraesCSU02G156600	protein serine/threonine kinase activity	molecular_function	GO:0004674	GNK2_sf
TraesCS2D02G584500
TraesCS5A02G409800				TF_GRAS
TraesCS5B02G423400				Uncharacterised_Ycf68
TraesCS5D02G083800
TraesCS7D02G255500
TraesCS7D02G256100
