# Supplementary material for: Pathogen-induced alterations in methylome during Lr48-mediated APR in wheat (Triticum aestivum L.)&nbsp;
Source: Research Square preprint supplement (doi:10.21203/rs.3.rs-336817/v1), 2021-03-23
Supplement: Supplementary file 5 [file a9e0b8629ac6f0f286883af5.xls]

## Sheet: Sheet1
Supplementary Table S19 List of differentially expressed genes (DEGs) in RNA-seq and differentially methylated regions DMRs) having p-value <=0.05 and log2FC ≥ 2 or ≤ −2 in R0 when compared to S0 in S0 vs R0.
Gene expression				Methylation
Gene ID	log2FoldChange	pval	Protein names	Chromosome	start	stop	logFC	p.value	type	Gene ID	Protein names
TraesCS1A02G148500	2.88536	0.0318653	Cytochrome b559 subunit alpha (PSII reaction center subunit V)	1A	256026901	256027000	-2.36059	7.2249e-08	Exon	TraesCS1A02G148500	Cytochrome b559 subunit alpha (PSII reaction center subunit V)
TraesCS1D02G182100	3.29155	0.0128962	Cytochrome b559 subunit alpha (PSII reaction center subunit V)	1D	254489001	254489100	-2.65524	8.55185e-14	promoter	TraesCS1D02G182100
TraesCS2B02G327300	-2.65992	0.0302461	Aamy domain-containing protein	2B	468656501	468656600	5.79531	0.0312734	intron	TraesCS2B02G327300	Uncharacterized protein;
TraesCS2D02G016100	Inf	3.78532e-05	Uncharacterized protein	2D	7834801	7834900	5.79531	0.0312734	exon	TraesCS2D02G016100	Uncharacterized protein
TraesCS3B02G186700	3.78533	0.0344717	Cytochrome b559 subunit alpha (PSII reaction center subunit V)	3B	201505901	201506000	-2.73844	6.61877e-16	promoter	TraesCS3B02G186700
TraesCS3D02G052800	3.5025	0.0398357	Cytochrome b559 subunit alpha (PSII reaction center subunit V)	3D	21896901	21897000	-2.55478	0.00131833	promoter	TraesCS3D02G052800
TraesCS5A02G523400	3.41385	0.00956107	Cytochrom_B559a domain-containing protein	5A	684324901	684325000	-3.49779	7.68171e-05	promoter	TraesCS5A02G523400
TraesCS5D02G220600	3.43095	0.0370651	Cytochrome b559 subunit alpha (PSII reaction center subunit V)	5D	329132301	329132400	-2.28764	6.0176e-05	promoter	TraesCS5D02G220600
TraesCS6D02G325800	3.4653	0.0420159	Cytochrome b559 subunit alpha (PSII reaction center subunit V)	6D	431399401	431399500	-2.39658	2.3431e-34	promoter, exon	TraesCS6D02G325800
TraesCSU02G158100	2.64386	0.0344638	Ribosomal_S7 domain-containing protein	Un	217913601	217913700	-2.16364	0.0127622	exon	TraesCSU02G158100	Uncharacterized protein
TraesCSU02G259100	4.41308	0.00264435	Cytochrome b559 subunit alpha (PSII reaction center subunit V)	Un	405771401	405771500	-2.12507	2.57758e-05	exon	TraesCSU02G259100	Cytochrome b559 subunit alpha (PSII reaction center subunit V)
TraesCSU02G259500	2.74416	0.0312081	Ribosomal protein S7	Un	406475001	406475100	-2.51448	3.43905e-05	exon	TraesCSU02G259500	Ribosomal protein S7
