# Supplementary material for: Pathogen-induced alterations in methylome during Lr48-mediated APR in wheat (Triticum aestivum L.)&nbsp;
Source: Research Square preprint supplement (doi:10.21203/rs.3.rs-336817/v1), 2021-03-23
Supplement: Supplementary file 6 [file b29a86df599ae2c8c540a976.xls]

## Sheet: Sheet1
Supplementary Table S21 List of differentially expressed genes (DEGs) in RNA-seq and differentially methylated regions DMRs) having p-value <=0.05 and log2FC ≥ 2 or ≤ −2 in R96 when compared to R0 in R0 vs R96.
Gene expression				Methylation
Gene ID	log2FoldChange	logFC	Protein names	Chromosome	start	stop	logFC	p.value	type	Gene ID	Protein names
TraesCS1A02G111400	#NAME?	2.56871	ATP-dependent Clp protease proteolytic subunit	1A	112777401	112777500	2.56871	1.10954e-05	promotor	TraesCS1A02G111400	ATP-dependent Clp protease proteolytic subunit
TraesCS1A02G130100	-8.50012	2.25656	RPOLD domain-containing protein	1A	168445001	168445100	2.25656	0.0129695	exon	TraesCS1A02G130100.1-E1
TraesCS1A02G277200	#NAME?	2.33191	Uncharacterized protein	1A	472172201	472172300	2.33191	2.83125e-08	exon	TraesCS1A02G277200.1-E1
TraesCS1A02G384400	-6.05601	2.41071	NAD(P)H-quinone oxidoreductase subunit 3, chloroplastic (EC 7.1.1.-) (NAD(P)H dehydrogenase subunit 3) (NADH-plastoquinone oxidoreductase subunit 3)	1A	554447901	554448200	2.41071	3.95507e-33	exon, Promoter	TraesCS1A02G384400	NAD(P)H-quinone oxidoreductase subunit 3, chloroplastic (EC 7.1.1.-) (NAD(P)H dehydrogenase subunit 3) (NADH-plastoquinone oxidoreductase subunit 3)
TraesCS1A02G384500	-7.31135	2.09931	Oxidored_q6 domain-containing protein	1A	554448201	554448300	2.09931	3.0836e-22	promoter	promoter:TraesCS1A02G384500
TraesCS1A02G384600	-10.3011	2.70334	Uncharacterized protein	1A	554458701	554458800	2.70334	2.0278e-67	exon, promoter	TraesCS1A02G384600.1-E1
TraesCS1A02G385000	#NAME?	2.75256	Photosystem I reaction center subunit VIII (PSI-I)	1A	554470701	554470800	2.75256	3.74433e-47	promoter	promoter:TraesCS1A02G385000
TraesCS1A02G433800	-10.1776	2.30943	Ribosomal_L16 domain-containing protein	1A	584779201	584779300	2.30943	6.81703e-12	exon	TraesCS1A02G433800.1-E1
TraesCS1B02G047700	-5.88418	2.63262	Uncharacterized protein	1B	27676001	27676100	2.63262	6.0176e-05	intron	Parent=transcript:TraesCS1B02G047700.1_2
TraesCS1B02G087800	#NAME?	3.0611	Uncharacterized protein	1B	83534401	83534500	3.0611	2.15948e-33	exon, promoter	TraesCS1B02G087800.1-E1
TraesCS1B02G317700	-10.5893	2.52236	Photosystem II reaction center protein Z (PSII-Z)	1B	542589701	542589800	2.52236	7.78469e-09	exon	TraesCS1B02G317700	Photosystem II reaction center protein Z (PSII-Z)
TraesCS1B02G352900	-10.8075	2.48356	Uncharacterized protein	1B	583549401	583549500	2.48356	0.00636217	exon	TraesCS1B02G352900.1-E1
TraesCS1B02G385600	-11.3595	2.67855	Proton_antipo_M domain-containing protein	1B	619186601	619188400	2.67855	0.000122056	exon	TraesCS1B02G385600.1-E3
TraesCS1B02G404500	-10.0066	2.18429	Photosystem II reaction center protein Z	1B	633708801	633708900	2.18429	2.59678e-30	exon, promoter	TraesCS1B02G404500	Photosystem II reaction center protein Z
TraesCS1B02G404700	-11.8702	2.13091	Uncharacterized protein	1B	633715301	633715400	2.13091	2.97612e-17	exon	TraesCS1B02G404700.1-E1
TraesCS1B02G404900	-8.02825	4.72151	ATP-synt_C domain-containing protein	1B	633716701	633716800	4.72151	7.68793e-06	exon	TraesCS1B02G404900.1-E1
TraesCS1B02G405200	-11.1429	4.23929	Uncharacterized protein	1B	633720201	633720300	4.23929	0.000245094	exon	TraesCS1B02G405200.1-E1
TraesCS1B02G405500	#NAME?	2.344	Uncharacterized protein	1B	633727701	633727800	2.344	1.43424e-07	exon	TraesCS1B02G405500.1-E1
TraesCS1B02G405600	-8.08607	2.84	NAD(P)H-quinone oxidoreductase subunit I, chloroplastic (EC 7.1.1.-)	1B	633728201	633728500	2.84	8.03725e-21	exon	TraesCS1B02G405600	NAD(P)H-quinone oxidoreductase subunit I, chloroplastic (EC 7.1.1.-)
TraesCS1B02G405700	#NAME?	3.72503	Uncharacterized protein	1B	633728801	633728900	3.72503	1.53628e-05	exon	TraesCS1B02G405700.1-E1
TraesCS1B02G405800	-11.3653	2.119	Uncharacterized protein	1B	633730401	633730500	2.119	2.47469e-05	exon	TraesCS1B02G405800.1-E1
TraesCS1B02G405900	-9.31214	2.85824	Complex1_49kDa domain-containing protein	1B	633732001	633732100	2.85824	3.62271e-05	promoter	promoter:TraesCS1B02G405900
TraesCS1B02G406000	#NAME?	3.10768	30S ribosomal protein S15	1B	633732301	633732400	3.10768	8.98214e-10	exon, promoter	TraesCS1B02G406000	30S ribosomal protein S15
TraesCS1B02G406700	-9.26536	2.09951	Proton_antipo_M domain-containing protein	1B	633747701	633747800	2.09951	1.21954e-09	intron, promoter	Parent=transcript:TraesCS1B02G406700.1_2
TraesCS1B02G412900	-9.93335	2.25656	ATP-synt_ab domain-containing protein	1B	638709401	638709500	2.25656	0.0129695	intron	Parent=transcript:TraesCS1B02G412900.1_1
TraesCS1D02G071200	-10.8599	2.22681	Uncharacterized protein	1D	51878001	51878100	2.22681	5.41749e-06	exon, promoter	TraesCS1D02G071200
TraesCS1D02G071300	-7.27872	4.19212	Maturase K	1D	51881301	51881400	4.19212	2.4145e-07	promoter	promoter:TraesCS1D02G071300
TraesCS1D02G071600	#NAME?	2.88208	Uncharacterized protein	1D	51917401	51917500	2.88208	1.1872e-18	promoter	promoter:TraesCS1D02G071600
TraesCS1D02G130500	-6.00118	2.51975	Uncharacterized protein	1D	144237801	144238100	2.51975	1.66866e-21	exon, promoter	TraesCS1D02G130500.1-E1
TraesCS1D02G179000	#NAME?	2.00158	Uncharacterized protein	1D	254385101	254385200	2.00158	0.00722652	promoter	promoter:TraesCS1D02G179000
TraesCS1D02G179200	-9.81261	2.29395	Proton_antipo_M domain-containing protein	1D	254391501	254393900	2.29395	4.72913e-27	exon, intron	TraesCS1D02G179200.1-E2
TraesCS1D02G179700	-10.2843	3.02998	Ribosomal_L2_C domain-containing protein	1D	254398101	254398200	3.02998	0.0117402	intron	Parent=transcript:TraesCS1D02G179700.1_1
TraesCS1D02G179800	-9.30108	2.70486	Uncharacterized protein	1D	254399301	254399500	2.70486	2.57146e-10	exon	TraesCS1D02G179800.1-E1
TraesCS1D02G180000	-10.9582	3.09878	Maturase K	1D	254402301	254402600	3.09878	1.33541e-07	exon	TraesCS1D02G180000	Maturase K
TraesCS1D02G180200	-9.5825	3.16183	Photosystem II reaction center protein I (PSII-I) (PSII 4.8 kDa protein)	1D	254417801	254417900	3.16183	1.64888e-06	exon, promoter	TraesCS1D02G180200	Photosystem II reaction center protein I (PSII-I) (PSII 4.8 kDa protein)
TraesCS1D02G180400	#NAME?	4.02297	Photosystem II reaction center protein Z	1D	254435901	254436000	4.02297	9.6373e-07	promoter	promoter:TraesCS1D02G180400
TraesCS1D02G180500	-10.146	2.53204	Photosystem II reaction center protein M (PSII-M)	1D	254440801	254440900	2.53204	4.58592e-24	promoter	promoter:TraesCS1D02G180500
TraesCS1D02G180600	-9.30108	2.25656	Uncharacterized protein	1D	254453601	254453700	2.25656	0.0129695	exon	TraesCS1D02G180600.1-E1
TraesCS1D02G180800	-11.5796	2.24268	ATP synthase subunit c, chloroplastic (ATP synthase F(0) sector subunit c) (ATPase subunit III) (F-type ATPase subunit c) (F-ATPase subunit c) (Lipid-binding protein)	1D	254458901	254459000	2.24268	2.47469e-05	promoter	promoter:TraesCS1D02G180800
TraesCS1D02G180900	-8.64566	3.34029	Uncharacterized protein	1D	254460701	254460800	3.34029	6.13544e-11	promoter	promoter:TraesCS1D02G180900
TraesCS1D02G181300	-6.8655	2.70373	Oxidored_q6 domain-containing protein	1D	254476701	254476800	2.70373	5.96503e-10	promoter	promoter:TraesCS1D02G181300
TraesCS1D02G181700	-12.1976	2.64986	Uncharacterized protein	1D	254484301	254484900	2.64986	6.2276e-12	Promoter, five_prime_UTR, exon	TraesCS1D02G181700.1-E1
TraesCS1D02G182100	#NAME?	2.60228	Cytochrome b559 subunit alpha (PSII reaction center subunit V)	1D	254489001	254489100	2.60228	5.15243e-15	promoter	promoter:TraesCS1D02G182100
TraesCS1D02G182300	-10.1053	2.19147	Uncharacterized protein	1D	254490301	254490400	2.19147	0.000328077	promoter	promoter:TraesCS1D02G182300
TraesCS1D02G182500	#NAME?	3.2139	ATP-dependent Clp protease proteolytic subunit (EC 3.4.21.92)	1D	254496801	254496900	3.2139	1.99006e-08	promoter	promoter:TraesCS1D02G182500
TraesCS1D02G182900	#NAME?	2.21875	Uncharacterized protein	1D	254499401	254499500	2.21875	6.10836e-13	exon	TraesCS1D02G182900.1-E1
TraesCS1D02G183200	#NAME?	6.0232	Uncharacterized protein	1A	15344401	15344500	6.0232	0.00782344	exon	TraesCS1A02G032900	Protein DETOXIFICATION (Multidrug and toxic compound extrusion protein)
TraesCS1D02G183400	-6.32311	5.88791	Uncharacterized protein	1A	15348301	15348400	5.88791	0.0156414	exon	TraesCS1A02G032900	Protein DETOXIFICATION (Multidrug and toxic compound extrusion protein)
TraesCS1D02G183900	#NAME?	2.56871	Uncharacterized protein	1A	112777401	112777500	2.56871	1.10954e-05	exon	TraesCS1A02G111400	ATP-dependent Clp protease proteolytic subunit
TraesCS1D02G184000	-9.14166	2.41071	Complex1_49kDa domain-containing protein	1A	554447901	554448000	2.41071	3.95507e-33	exon, promoter	TraesCS1A02G384400	NAD(P)H-quinone oxidoreductase subunit 3, chloroplastic (EC 7.1.1.-) (NAD(P)H dehydrogenase subunit 3) (NADH-plastoquinone oxidoreductase subunit 3)
TraesCS1D02G193600	-11.0103	2.08819	ATP synthase subunit alpha	1D	269427501	269427600	2.08819	0.0225028	exon	TraesCS1D02G193600	ATP synthase subunit alpha
TraesCS1D02G205100	-6.80596	3.17862	Oxidored_q6 domain-containing protein	1D	290506901	290507000	3.17862	0.000145836	promoter	promoter:TraesCS1D02G205100
TraesCS1D02G295600	#NAME?	2.8956	50S ribosomal protein L33, chloroplastic	1D	394180901	394181000	2.8956	8.94965e-53	promoter	promoter:TraesCS1D02G295600
TraesCS1D02G435100	-11.6111	2.39121	ATP-dependent Clp protease proteolytic subunit	1D	483915901	483916100	2.39121	9.66918e-07	promotor	TraesCS1D02G435100	ATP-dependent Clp protease proteolytic subunit
TraesCS1D02G435200	-7.92257	2.59257	Uncharacterized protein	1D	483918101	483918400	2.59257	1.40525e-27	exon	TraesCS1D02G435200.1-E1
TraesCS1D02G435400	#NAME?	7.49162	Uncharacterized protein	1D	483921401	483921500	7.49162	1.53628e-05	promoter	promoter:TraesCS1D02G435400
TraesCS2A02G210900	-9.52664	2.40732	Uncharacterized protein	2A	194953601	194953800	2.40732	0.0074061	exon, promoter	TraesCS2A02G210900.1-E1
TraesCS2A02G232500	#NAME?	2.84945	Uncharacterized protein	2A	276441601	276441800	2.84945	7.0542e-14	promoter	promoter:TraesCS2A02G232500
TraesCS2A02G240800	#NAME?	2.48356	Cytochrome b559 subunit beta (PSII reaction center subunit VI)	2A	335825201	335825300	2.48356	0.00636217	exon	TraesCS2A02G240800	Cytochrome b559 subunit beta (PSII reaction center subunit VI)
TraesCS2A02G241300	#NAME?	2.32452	Uncharacterized protein	2A	335828601	335828700	2.32452	0.000860688	exon	TraesCS2A02G241300.1-E1
TraesCS2A02G241500	#NAME?	2.60321	Uncharacterized protein	2A	335829501	335829700	2.60321	0.000157883	exon	TraesCS2A02G241500.1-E1
TraesCS2A02G242200	#NAME?	2.22681	Uncharacterized protein	2A	335843901	335844000	2.22681	5.41749e-06	exon, promoter	TraesCS2A02G242200.1-E1
TraesCS2A02G470300	-10.671	3.34911	Uncharacterized protein	2A	713026301	713026400	3.34911	0.00183717	promoter	promoter:TraesCS2A02G470300
TraesCS2B02G330500	#NAME?	2.81501	Uncharacterized protein	2B	474900301	474900400	2.81501	6.5972e-22	exon, promoter	promoter:TraesCS2B02G330500
TraesCS2B02G331300	-8.48817	2.65193	Uncharacterized protein	2B	474910001	474910500	2.65193	0.0034275	exon, promoter	TraesCS2B02G331300.1-E1
TraesCS2B02G331500	-9.00664	2.1265	Uncharacterized protein	2B	474914701	474914800	2.1265	6.02287e-37	exon, promoter	TraesCS2B02G331500.1-E1
TraesCS2B02G338000	-7.88921	2.16722	Uncharacterized protein	2B	482854101	482854400	2.16722	1.25812e-06	exon	TraesCS2B02G338000.1-E1
TraesCS2B02G487200	-9.29192	2.07799	Uncharacterized protein	2B	683728901	683729000	2.07799	3.0836e-22	exon, promoter	TraesCS2B02G487200.1-E1
TraesCS2D02G020800	-12.1053	3.0842	Uncharacterized protein	2D	9785301	9785400	3.0842	2.42058e-27	exon, promoter	TraesCS2D02G020800.1-E1
TraesCS2D02G079300	-10.7217	2.66575	NAD(P)H-quinone oxidoreductase subunit 6, chloroplastic (EC 7.1.1.-) (NAD(P)H dehydrogenase subunit 6) (NADH-plastoquinone oxidoreductase subunit 6)	2D	33934901	33935300	2.66575	6.6184e-21	exon	TraesCS2D02G079300	NAD(P)H-quinone oxidoreductase subunit 6, chloroplastic (EC 7.1.1.-) (NAD(P)H dehydrogenase subunit 6) (NADH-plastoquinone oxidoreductase subunit 6)
TraesCS2D02G079400	-8.86368	2.1496	NAD(P)H-quinone oxidoreductase subunit 4L, chloroplastic (EC 7.1.1.-) (NAD(P)H dehydrogenase subunit 4L) (NADH-plastoquinone oxidoreductase subunit 4L)	2D	33935601	33935800	2.1496	7.79187e-30	exon, promoter	TraesCS2D02G079400	NAD(P)H-quinone oxidoreductase subunit 4L, chloroplastic (EC 7.1.1.-) (NAD(P)H dehydrogenase subunit 4L) (NADH-plastoquinone oxidoreductase subunit 4L)
TraesCS2D02G243100	-5.23035	2.01856	Ribosomal_L16 domain-containing protein	2D	272797601	272797700	2.01856	0.0015534	promoter	promoter:TraesCS2D02G243100
TraesCS2D02G243300	-4.95114	2.18039	Uncharacterized protein	2D	272798901	272799200	2.18039	9.43945e-22	exon, promoter	TraesCS2D02G243300.1
TraesCS2D02G243400	-7.04122	2.27083	Uncharacterized protein	2D	272800101	272800300	2.27083	9.66376e-19	exon	TraesCS2D02G243400.1
TraesCS2D02G243500	-9.03026	2.21347	NAD(P)H-quinone oxidoreductase subunit I, chloroplastic (EC 7.1.1.-)	2D	272801301	272801400	2.21347	3.95506e-20	exon	TraesCS2D02G243500	NAD(P)H-quinone oxidoreductase subunit I, chloroplastic (EC 7.1.1.-)
TraesCS2D02G243600	-9.34481	2.57205	Uncharacterized protein	2D	272801601	272801700	2.57205	1.42924e-23	exon, promoter	TraesCS2D02G243600.1
TraesCS2D02G243700	-9.42235	2.25656	Complex1_49kDa domain-containing protein	2D	272803901	272804800	2.25656	0.0129695	exon, promoter	TraesCS2D02G243700.1-E1
TraesCS2D02G270800	-9.6653	2.38657	Cytochrome b6-f complex subunit 6 (Cytochrome b6-f complex subunit PetL) (Cytochrome b6-f complex subunit VI)	2D	334226201	334226300	2.38657	0.000537698	promoter	promoter:TraesCS2D02G270800
TraesCS2D02G271100	#NAME?	2.18599	Uncharacterized protein	2D	334229501	334229600	2.18599	6.70428e-05	exon, promoter	TraesCS2D02G271100.1-E1
TraesCS2D02G495000	#NAME?	2.98854	30S ribosomal protein S15	2D	591992501	591992600	2.98854	0.000122056	promoter	promoter:TraesCS2D02G495000
TraesCS2D02G557000	-8.4758	2.37486	S4 RNA-binding domain-containing protein	2D	630262601	630262900	2.37486	3.27053e-17	exon, promoter	TraesCS2D02G557000.1-E1
TraesCS2D02G557100	-10.0034	2.37207	Uncharacterized protein	2D	630267101	630267200	2.37207	2.88843e-38	promoter	promoter:TraesCS2D02G557100
TraesCS2D02G557200	-10.1367	2.09005	NAD(P)H-quinone oxidoreductase subunit 6, chloroplastic (EC 7.1.1.-) (NAD(P)H dehydrogenase subunit 6) (NADH-plastoquinone oxidoreductase subunit 6)	2D	630271301	630271800	2.09005	4.82349e-28	exon, promoter	TraesCS2D02G557200	NAD(P)H-quinone oxidoreductase subunit 6, chloroplastic (EC 7.1.1.-) (NAD(P)H dehydrogenase subunit 6) (NADH-plastoquinone oxidoreductase subunit 6)
TraesCS2D02G566300	-8.0925	2.52211	Ribosomal_S3_C domain-containing protein	2D	635584601	635585200	2.52211	5.31919e-16	exon	TraesCS2D02G566300.1-E1
TraesCS2D02G573100	-9.60719	2.20133	Photosystem II reaction center protein Z	2D	638425601	638425700	2.20133	3.09694e-19	exon	TraesCS2D02G573100	Photosystem II reaction center protein Z
TraesCS2D02G595600	-7.55882	2.22115	Oxidored_q6 domain-containing protein	2D	648663701	648664000	2.22115	3.0369e-09	exon, promoter	TraesCS2D02G595600.1-E1
TraesCS3A02G006900	3.51107	-2.77194	Uncharacterized protein	3A	7385201	7385300	-2.77194	0.0225028	exon	TraesCS3A02G006900.1-E3
TraesCS3A02G173700	#NAME?	3.06386	NADH-ubiquinone oxidoreductase chain 3 (EC 7.1.1.2)	3A	191856801	191856900	3.06386	0.000276113	exon	TraesCS3A02G173700	NADH-ubiquinone oxidoreductase chain 3 (EC 7.1.1.2)
TraesCS3A02G194700	-8.34222	2.51708	S4 RNA-binding domain-containing protein	3A	273159801	273160200	2.51708	1.93439e-19	exon	TraesCS3A02G194700.1-E2
TraesCS3A02G430000	#NAME?	2.64542	Uncharacterized protein	3A	672876501	672876600	2.64542	6.14264e-11	exon, promoter	TraesCS3A02G430000.1-E1
TraesCS3A02G430200	-8.45435	2.27368	NAD(P)H-quinone oxidoreductase subunit I, chloroplastic (EC 7.1.1.-)	3A	672878101	672878200	2.27368	1.86716e-20	exon	TraesCS3A02G430200	NAD(P)H-quinone oxidoreductase subunit I, chloroplastic (EC 7.1.1.-)
TraesCS3A02G430300	#NAME?	3.03461	Uncharacterized protein	3A	672878401	672878500	3.03461	1.51615e-17	exon	TraesCS3A02G430300.1-E1
TraesCS3A02G430700	#NAME?	2.54529	Uncharacterized protein	3A	672900801	672900900	2.54529	2.30165e-26	exon, promoter	TraesCS3A02G430700.1-E1
TraesCS3A02G454200	#NAME?	2.25656	S1-like domain-containing protein	3A	692572801	692572900	2.25656	0.0129695	promoter	promoter:TraesCS3A02G454200
TraesCS3B02G011000	#NAME?	2.09732	Uncharacterized protein	3B	5083301	5083500	2.09732	0.0213208	exon, promoter	TraesCS3B02G011000.1-E1
TraesCS3B02G121700	-12.3542	2.80269	Ribosomal_S7 domain-containing protein	3B	92238501	92238600	2.80269	0.00183717	exon, three_prime_UTR	Parent=transcript:TraesCS3B02G121700.1
TraesCS3B02G125800	-12.071	2.25897	Uncharacterized protein	3B	101913001	101913200	2.25897	4.03097e-56	exon, promoter	TraesCS3B02G125800.1-E1
TraesCS3B02G125900	#NAME?	2.11346	Uncharacterized protein	3B	101914901	101915000	2.11346	9.24601e-58	exon	TraesCS3B02G125900.1-E2
TraesCS3B02G126100	-9.24285	2.17708	Uncharacterized protein	3B	101918701	101918800	2.17708	2.29502e-11	exon, promoter	TraesCS3B02G126100.1-E1
TraesCS3B02G186300	#NAME?	2.33186	Uncharacterized protein	3B	201501401	201501800	2.33186	2.06168e-25	exon, promoter	TraesCS3B02G186300.1-E1
TraesCS3B02G186700	-13.5939	2.99011	Cytochrome b559 subunit alpha (PSII reaction center subunit V)	3B	201505901	201506000	2.99011	6.26146e-24	promoter	promoter:TraesCS3B02G186700
TraesCS3B02G187200	#NAME?	2.09984	Uncharacterized protein	3B	201510101	201510200	2.09984	6.94264e-23	exon, promoter	TraesCS3B02G187200.1-E1
TraesCS3B02G187300	-11.0486	2.15119	ATP-dependent Clp protease proteolytic subunit (EC 3.4.21.92)	3B	201511201	201511800	2.15119	3.1556e-12	exon, promoter	TraesCS3B02G187300	ATP-dependent Clp protease proteolytic subunit (EC 3.4.21.92)
TraesCS3B02G187500	#NAME?	2.1132	Uncharacterized protein	3B	201516001	201516100	2.1132	8.10445e-26	exon, promoter	TraesCS3B02G187500.1-E1
TraesCS3B02G187600	-8.96522	2.09154	Uncharacterized protein	3B	201520901	201521000	2.09154	6.41352e-24	promoter	promoter:TraesCS3B02G187600
TraesCS3B02G187800	-7.95549	2.28374	Uncharacterized protein	3B	201525701	201525800	2.28374	5.48673e-08	promoter	promoter:TraesCS3B02G187800
TraesCS3B02G187900	-5.7512	2.08399	Ribosomal_S7 domain-containing protein	3B	201533801	201533900	2.08399	9.38923e-16	exon	TraesCS3B02G187900.1-E1
TraesCS3B02G188000	#NAME?	2.18693	Uncharacterized protein	3B	201536101	201536200	2.18693	2.31886e-14	exon	TraesCS3B02G188000.1-E1
TraesCS3B02G188700	-11.613	2.05455	Cytochrom_C_asm domain-containing protein	3B	201555501	201555800	2.05455	1.74833e-10	exon	TraesCS3B02G188700.1-E1
TraesCS3B02G188900	-4.87911	4.19212	Uncharacterized protein	3B	201558301	201558400	4.19212	2.4145e-07	promoter	promoter:TraesCS3B02G188900
TraesCS3B02G189000	-8.88648	2.50184	Uncharacterized protein	3B	201559601	201559700	2.50184	1.95723e-05	exon	TraesCS3B02G189000.1-E1
TraesCS3B02G189100	-9.48166	2.80422	NAD(P)H-quinone oxidoreductase subunit I, chloroplastic (EC 7.1.1.-)	3B	201560101	201560400	2.80422	5.31907e-12	exon	TraesCS3B02G189100	NAD(P)H-quinone oxidoreductase subunit I, chloroplastic (EC 7.1.1.-)
TraesCS3B02G189300	#NAME?	2.2773	30S ribosomal protein S15	3B	201564201	201564300	2.2773	3.19553e-06	exon	TraesCS3B02G189300	30S ribosomal protein S15
TraesCS3B02G287400	-9.6392	2.18693	Uncharacterized protein	3B	460162501	460163100	2.18693	2.31886e-14	exon	TraesCS3B02G287400.1-E1
TraesCS3B02G563300	-10.4706	2.17269	Photosystem II reaction center protein M (PSII-M)	3B	796327701	796327800	2.17269	1.05778e-57	promoter	promoter:TraesCS3B02G563300
TraesCS3B02G582300	-11.3688	3.31275	Uncharacterized protein	3B	810482401	810482500	3.31275	7.60112e-17	exon	TraesCS3B02G582300.1-E1
TraesCS3D02G029800	-13.3354	2.57715	Uncharacterized protein	3D	10748001	10748100	2.57715	5.92281e-08	exon, promoter	TraesCS3D02G029800.1-E1
TraesCS3D02G052600	#NAME?	2.25974	Uncharacterized protein	3D	21896101	21896200	2.25974	3.30021e-11	exon	TraesCS3D02G052600.1-E1
TraesCS3D02G053000	-8.27872	2.52123	50S ribosomal protein L33, chloroplastic	3D	21899701	21899800	2.52123	2.68939e-32	exon, promoter	TraesCS3D02G053000	50S ribosomal protein L33, chloroplastic
TraesCS3D02G053100	-6.9733	3.07895	Uncharacterized protein	3D	21900201	21900600	3.07895	2.42344e-18	exon, promoter	TraesCS3D02G053100.1-E1
TraesCS3D02G053200	-9.84096	2.10616	Uncharacterized protein	3D	21901101	21901200	2.10616	8.77189e-12	exon	TraesCS3D02G053200.1-E1
TraesCS3D02G053300	-13.7494	3.47183	ATP-dependent Clp protease proteolytic subunit (EC 3.4.21.92)	3D	21902901	21903300	3.47183	2.19611e-07	exon	TraesCS3D02G053300	ATP-dependent Clp protease proteolytic subunit (EC 3.4.21.92)
TraesCS3D02G057700	-9.88308	2.48518	30S ribosomal protein S4, chloroplastic	3D	24160701	24161200	2.48518	3.0338e-23	exon	TraesCS3D02G057700	30S ribosomal protein S4, chloroplastic
TraesCS3D02G057800	#NAME?	2.08819	Uncharacterized protein	3D	24167401	24167500	2.08819	0.0225028	promoter	promoter:TraesCS3D02G057800
TraesCS3D02G057900	-8.22584	2.60112	Ribosomal_L16 domain-containing protein	3D	24168001	24168100	2.60112	2.15242e-39	promoter	promoter:TraesCS3D02G057900
TraesCS3D02G058000	-10.7625	2.59969	Ribosomal_S3_C domain-containing protein	3D	24170701	24171300	2.59969	4.5458e-07	exon	TraesCS3D02G058000.1-E1
TraesCS3D02G095900	-6.60064	2.0317	Uncharacterized protein	3D	48687801	48687900	2.0317	0.00091941	promoter	promoter:TraesCS3D02G095900
TraesCS3D02G177200	-13.2416	2.10616	Cytochrom_C_asm domain-containing protein	3D	158930701	158930900	2.10616	8.77189e-12	exon	TraesCS3D02G177200.1-E1
TraesCS3D02G177300	-9.9094	2.02124	Cytochrom_C_asm domain-containing protein	3D	158936901	158937100	2.02124	2.08276e-09	exon	TraesCS3D02G177300.1-E1
TraesCS3D02G177400	-4.03953	3.14738	Uncharacterized protein	3D	158938001	158938100	3.14738	1.48859e-13	exon	TraesCS3D02G177400.1-E1
TraesCS3D02G469600	#NAME?	2.21018	Uncharacterized protein	3D	571592801	571592900	2.21018	2.4492e-07	promoter	promoter:TraesCS3D02G469600
TraesCS3D02G469800	-11.0523	2.38455	Uncharacterized protein	3D	571592901	571593300	2.38455	4.87585e-08	exon	TraesCS3D02G469800.1-E1
TraesCS3D02G498500	#NAME?	2.42143	30S ribosomal protein S15	3D	589253001	589253100	2.42143	9.0084e-24	exon, promoter	TraesCS3D02G498500	30S ribosomal protein S15
TraesCS4A02G116500	-9.12936	2.01464	NAD(P)H-quinone oxidoreductase subunit J, chloroplastic	4A	141128701	141128900	2.01464	4.26894e-05	exon, promoter	TraesCS4A02G116500	NAD(P)H-quinone oxidoreductase subunit J, chloroplastic
TraesCS4A02G116600	-7.50111	3.34911	Uncharacterized protein	4A	141129301	141129400	3.34911	0.00183717	exon	TraesCS4A02G116600.1-E1	-
TraesCS4A02G154500	-9.0925	2.01856	Uncharacterized protein	4A	310737301	310737400	2.01856	0.0015534	exon	TraesCS4A02G154500.1-E1
TraesCS4B02G000100	-9.7358	2.33618	NAD(P)H-quinone oxidoreductase subunit 4L, chloroplastic (EC 7.1.1.-) (NAD(P)H dehydrogenase subunit 4L) (NADH-plastoquinone oxidoreductase subunit 4L)	4B	1	400	2.33618	3.1027e-18	exon	TraesCS4B02G000100	NAD(P)H-quinone oxidoreductase subunit 4L, chloroplastic (EC 7.1.1.-) (NAD(P)H dehydrogenase subunit 4L) (NADH-plastoquinone oxidoreductase subunit 4L)
TraesCS4B02G124900	#NAME?	2.2173	30S ribosomal protein S15, chloroplastic	4B	151526001	151526100	2.2173	2.93287e-71	exon, promoter	TraesCS4B02G124900	30S ribosomal protein S15, chloroplastic
TraesCS4B02G145900	-10.6163	4.08853	Uncharacterized protein	4B	209080401	209080500	4.08853	0.000489894	exon	TraesCS4B02G145900.1-E1
TraesCS4B02G146300	#NAME?	2.10523	Proton_antipo_M domain-containing protein	4B	209113001	209113100	2.10523	4.00871e-11	promoter	promoter:TraesCS4B02G146300
TraesCS4B02G158900	#NAME?	8.0739	Photosystem II reaction center protein Z	4B	308678601	308678700	8.0739	3.02899e-08	exon, promoter	TraesCS4B02G158900	Photosystem II reaction center protein Z
TraesCS4B02G238500	-12.014	2.24268	Proton_antipo_M domain-containing protein	4B	495579501	495579600	2.24268	2.47469e-05	exon	TraesCS4B02G238500.1-E4
TraesCS4B02G245600	-8.7585	2.69941	Uncharacterized protein	4B	507429001	507429400	2.69941	9.68891e-24	exon, three_prime_UTR	TraesCS4B02G245600.1-E1
TraesCS4D02G151600	-11.3349	2.31677	Proton_antipo_M domain-containing protein	4D	177443301	177445200	2.31677	2.27037e-05	exon	TraesCS4D02G151600.1-E2
TraesCS4D02G206800	#NAME?	2.06839	30S ribosomal protein S15	4D	354587301	354587400	2.06839	9.12791e-09	exon	TraesCS4D02G206800	30S ribosomal protein S15
TraesCS4D02G362200	#NAME?	2.43172	Uncharacterized protein	4D	508591201	508591300	2.43172	6.0176e-05	exon	TraesCS4D02G362200.1-E1
TraesCS5A02G010700	-8.18561	2.0317	Uncharacterized protein	5A	7105101	7105300	2.0317	0.00091941	exon	TraesCS5A02G010700.1-E1
TraesCS5A02G019900	-10.5344	2.25656	ATP synthase subunit alpha	5A	16544801	16544900	2.25656	0.0129695	exon, promoter	TraesCS5A02G019900	ATP synthase subunit alpha
TraesCS5A02G272300	-10.5787	2.04714	Cytochrom_C_asm domain-containing protein	5A	482024201	482024300	2.04714	5.94896e-12	exon	TraesCS5A02G272300.1-E1
TraesCS5A02G375500	-3.81928	2.51415	NPH3 domain-containing protein	5A	573591201	573591300	2.51415	1.12394e-12	exon, three_prime_UTR	TraesCS5A02G375500.2-E4
TraesCS5A02G420800	-10.2617	3.03759	Uncharacterized protein	5A	607199701	607199900	3.03759	2.51049e-07	exon	TraesCS5A02G420800.1-E1
TraesCS5A02G421200	#NAME?	2.08819	Ribosomal_L2_C domain-containing protein	5A	607274001	607274200	2.08819	0.0225028	intron	Parent=transcript:TraesCS5A02G421200.1_1
TraesCS5A02G421300	#NAME?	2.08819	Uncharacterized protein	5A	607274001	607274500	2.08819	0.0225028	intron, exon	Parent=transcript:TraesCS5A02G421300.1_1
TraesCS5A02G436600	#NAME?	2.10703	Uncharacterized protein	5A	619265901	619266000	2.10703	9.21389e-12	exon	TraesCS5A02G436600.1-E1
TraesCS5A02G436700	#NAME?	2.10703	Ribosomal_L2_C domain-containing protein	5A	619265901	619266000	2.10703	9.21389e-12	exon, Promoter	TraesCS5A02G436700.1-E1
TraesCS5A02G523400	-10.3555	3.47656	Cytochrom_B559a domain-containing protein	5A	684324901	684325000	3.47656	1.10723e-05	promoter	promoter:TraesCS5A02G523400
TraesCS5B02G052600	-10.1242	3.38392	Uncharacterized protein	5B	57513501	57513600	3.38392	4.03632e-05	exon, Promoter	TraesCS5B02G052600.1-E1
TraesCS5B02G057400	-3.9854	2.40538	SAP domain-containing protein	5B	63467801	63468100	2.40538	6.60942e-11	intron	Parent=transcript:TraesCS5B02G057400.1_14
TraesCS5B02G097400	-7.5895	2.52727	DYW_deaminase domain-containing protein	5B	128815201	128815300	2.52727	1.97889e-06	three_prime_UTR, exon	Parent=transcript:TraesCS5B02G097400.1
TraesCS5B02G098400	-9.19547	3.61027	Proton_antipo_M domain-containing protein	5B	130570701	130570800	3.61027	0.000276113	promoter	promoter:TraesCS5B02G098400
TraesCS5B02G234800	-8.38724	2.09975	NAD(P)H-quinone oxidoreductase subunit 4L, chloroplastic (EC 7.1.1.-) (NAD(P)H dehydrogenase subunit 4L) (NADH-plastoquinone oxidoreductase subunit 4L)	5B	413609201	413609400	2.09975	5.7098e-16	exon, promoter	TraesCS5B02G234800	NAD(P)H-quinone oxidoreductase subunit 4L, chloroplastic (EC 7.1.1.-) (NAD(P)H dehydrogenase subunit 4L) (NADH-plastoquinone oxidoreductase subunit 4L)
TraesCS5B02G234900	-4.6035	2.88214	Uncharacterized protein	5B	413609801	413609900	2.88214	7.80705e-07	promoter	promoter:TraesCS5B02G234900	NAD(P)H-quinone oxidoreductase subunit 4L, chloroplastic (EC 7.1.1.-) (NAD(P)H dehydrogenase subunit 4L) (NADH-plastoquinone oxidoreductase subunit 4L)
TraesCS5B02G247000	-9.35125	2.90282	Uncharacterized protein	5B	429038101	429038200	2.90282	1.17505e-14	exon	TraesCS5B02G247000.1-E1
TraesCS5B02G247200	-3.72758	3.21126	Uncharacterized protein	5B	429064301	429064400	3.21126	3.29857e-24	exon	TraesCS5B02G247200.1-E1
TraesCS5B02G312400	-6.90731	2.128	S1-like domain-containing protein	5B	493986501	493986700	2.128	1.67176e-10	exon, Promoter	TraesCS5B02G312400.1-E1
TraesCS5D02G007600	-9.88028	2.16048	Uncharacterized protein	5D	6164801	6164900	2.16048	2.40547e-27	exon	TraesCS5D02G007600.1-E1
TraesCS5D02G008400	#NAME?	2.06251	Uncharacterized protein	5D	6187601	6187700	2.06251	4.01249e-08	exon, Promoter	TraesCS5D02G008400.1-E1
TraesCS5D02G008600	#NAME?	2.02287	Uncharacterized protein	5D	6188801	6188900	2.02287	1.5694e-05	intron, promoter	Parent=transcript:TraesCS5D02G008600.1_1
TraesCS5D02G009000	-11.5418	2.82094	Proton_antipo_M domain-containing protein	5D	6193201	6195300	2.82094	1.42613e-06	exon	TraesCS5D02G009000.1-E6
TraesCS5D02G009400	-10.3788	2.5957	ATP-dependent Clp protease proteolytic subunit	5D	6202401	6202500	2.5957	6.04357e-24	promoter	promoter:TraesCS5D02G009400
TraesCS5D02G010500	-5.37898	2.59067	Uncharacterized protein	5D	6235901	6236000	2.59067	1.16822e-13	exon, Promoter	TraesCS5D02G010500.1-E1
TraesCS5D02G010700	-8.19308	2.19986	NAD(P)H-quinone oxidoreductase subunit J, chloroplastic	5D	6237101	6237300	2.19986	1.13273e-23	exon	TraesCS5D02G010700	NAD(P)H-quinone oxidoreductase subunit J, chloroplastic
TraesCS5D02G010800	-9.02691	2.00509	S4 RNA-binding domain-containing protein	5D	6240501	6240700	2.00509	7.13353e-05	exon	TraesCS5D02G010800.1-E2	NAD(P)H-quinone oxidoreductase subunit J, chloroplastic
TraesCS5D02G011200	-12.5802	2.5075	ATP-synt_C domain-containing protein	5D	6253701	6253800	2.5075	3.64918e-20	promoter	promoter:TraesCS5D02G011200
TraesCS5D02G011400	-7.78285	3.06386	Uncharacterized protein	5D	6255201	6255800	3.06386	0.000276113	exon	TraesCS5D02G011400.1-E1
TraesCS5D02G151000	#NAME?	2.94161	Photosystem I reaction center subunit IX (PSI-J)	5D	240132601	240132700	2.94161	3.16523e-16	promoter	promoter:TraesCS5D02G151000
TraesCS5D02G196700	-12.319	2.19141	ATP synthase subunit c, chloroplastic (ATP synthase F(0) sector subunit c) (ATPase subunit III) (F-type ATPase subunit c) (F-ATPase subunit c) (Lipid-binding protein)	5D	299972701	299972800	2.19141	1.54906e-13	promoter, exon	TraesCS5D02G196700	ATP synthase subunit c, chloroplastic (ATP synthase F(0) sector subunit c) (ATPase subunit III) (F-type ATPase subunit c) (F-ATPase subunit c) (Lipid-binding protein)
TraesCS5D02G219900	-6.08607	2.0734	Uncharacterized protein	5D	329121601	329121900	2.0734	8.43437e-17	exon	TraesCS5D02G219900.1-E1
TraesCS5D02G220400	-12.2205	2.97368	Cytochrome b6-f complex subunit 5 (Cytochrome b6-f complex subunit PetG) (Cytochrome b6-f complex subunit V)	5D	329130901	329131000	2.97368	2.59816e-06	exon	TraesCS5D02G220400	Cytochrome b6-f complex subunit 5 (Cytochrome b6-f complex subunit PetG) (Cytochrome b6-f complex subunit V)
TraesCS5D02G220600	-15.2488	2.0578	Cytochrome b559 subunit alpha (PSII reaction center subunit V)	5D	329132501	329132600	2.0578	0.000117812	promoter, exon	TraesCS5D02G220600	Cytochrome b559 subunit alpha (PSII reaction center subunit V)
TraesCS5D02G220700	#NAME?	2.0578	Cytochrom_B559 domain-containing protein	5D	329132501	329132600	2.0578	0.000117812	promoter	promoter:TraesCS5D02G220700
TraesCS5D02G221500	#NAME?	2.81044	Protein PsbN	5D	329163401	329163500	2.81044	5.70704e-11	promoter	promoter:TraesCS5D02G221500
TraesCS5D02G326900	-6.89343	2.03586	Uncharacterized protein	5D	419364601	419364800	2.03586	1.82603e-10	exon	TraesCS5D02G326900.1-E1
TraesCS5D02G345000	#NAME?	2.0317	Uncharacterized protein	5D	432332401	432332500	2.0317	0.00091941	promoter	promoter:TraesCS5D02G345000
TraesCS5D02G372200	#NAME?	2.39644	Uncharacterized protein	5D	446178001	446178100	2.39644	8.39699e-28	exon, promoter	TraesCS5D02G372200.1-E2
TraesCS5D02G376700	#NAME?	3.05154	30S ribosomal protein S15	5D	449149201	449149300	3.05154	6.84614e-08	promoter	promoter:TraesCS5D02G376700
TraesCS5D02G376800	-10.3609	2.20688	Complex1_49kDa domain-containing protein	5D	449150301	449150500	2.20688	0.0015534	exon, promoter	TraesCS5D02G376800.1-E1
TraesCS5D02G376900	-10.8897	2.05074	Uncharacterized protein	5D	449152101	449152200	2.05074	2.42768e-20	exon, promoter	TraesCS5D02G376900.1-E1
TraesCS5D02G377000	-6.82561	2.89943	Uncharacterized protein	5D	449152701	449153000	2.89943	2.471e-41	exon	TraesCS5D02G377000.1-E1
TraesCS5D02G421500	#NAME?	3.19835	Uncharacterized protein	5D	481596601	481596700	3.19835	0.0034275	exon	TraesCS5D02G421500.1-E1
TraesCS5D02G425000	-9.77856	2.24268	Uncharacterized protein	5D	483800501	483800700	2.24268	2.47469e-05	exon, promoter	TraesCS5D02G425000.1-E1
TraesCS5D02G456400	-6.23291	2.16056	Uncharacterized protein	5D	503213001	503213200	2.16056	1.01922e-17	exon, promoter	TraesCS5D02G456400.1-E2
TraesCS5D02G456500	#NAME?	2.93918	Uncharacterized protein	5D	503213901	503214000	2.93918	0.000980413	promoter	promoter:TraesCS5D02G456500
TraesCS5D02G456600	-8.16188	3.35506	Ribosomal_S3_C domain-containing protein	5D	503214501	503216200	3.35506	1.09806e-11	exon, three_prime_UTR	TraesCS5D02G456600.1-E1
TraesCS5D02G456700	#NAME?	2.15448	Uncharacterized protein	5D	503216801	503216900	2.15448	9.46092e-23	promoter	promoter:TraesCS5D02G456700
TraesCS5D02G456900	-7.44864	3.06199	Uncharacterized protein	5D	503232301	503232400	3.06199	3.12385e-09	promoter	promoter:TraesCS5D02G456900
TraesCS5D02G457200	-3.97386	3.20313	Uncharacterized protein	5D	503253801	503253900	3.20313	5.81221e-09	exon	TraesCS5D02G457200.1-E1
TraesCS5D02G457600	-9.71385	2.07581	Proton_antipo_M domain-containing protein	5D	503271901	503274300	2.07581	3.98847e-25	exon	TraesCS5D02G457600.1-E1
TraesCS5D02G457700	-9.76253	2.31555	Uncharacterized protein	5D	503276201	503276300	2.31555	8.09766e-37	exon, promoter	TraesCS5D02G457700.1-E1
TraesCS5D02G458000	-9.84096	2.05071	Ribosomal_L2_C domain-containing protein	5D	503278601	503278700	2.05071	0.000197437	exon	TraesCS5D02G458000.1-E1
TraesCS5D02G458300	-9.98608	2.32708	Photosystem II reaction center protein Z	5D	503292901	503293000	2.32708	1.33467e-21	exon, promoter	TraesCS5D02G458300	Photosystem II reaction center protein Z
TraesCS5D02G458600	-8.09121	2.48292	Uncharacterized protein	5D	503311401	503311500	2.48292	2.38351e-08	exon	TraesCS5D02G458600.1-E1
TraesCS5D02G459000	-7.63776	2.47325	Oxidored_q6 domain-containing protein	5D	503330601	503330700	2.47325	0.000732495	promoter	promoter:TraesCS5D02G459000
TraesCS5D02G459100	#NAME?	2.37327	Uncharacterized protein	5D	503338301	503338400	2.37327	6.41947e-07	exon	TraesCS5D02G459100.1-E1
TraesCS5D02G459200	-10.9582	3.17862	ATP-synt_C domain-containing protein	5D	503338901	503339000	3.17862	0.000145836	promoter	promoter:TraesCS5D02G459200
TraesCS5D02G544600	-12.1078	2.20696	Cytochrome b6-f complex subunit 5 (Cytochrome b6-f complex subunit PetG) (Cytochrome b6-f complex subunit V)	5D	554200901	554201000	2.20696	2.73213e-46	promoter	promoter:TraesCS5D02G544600	-
TraesCS5D02G559700	#NAME?	2.41965	Uncharacterized protein	5D	560873801	560873900	2.41965	4.32284e-15	exon	TraesCS5D02G559700.1-E1
TraesCS5D02G559900	#NAME?	2.63793	Uncharacterized protein	5D	560879501	560879600	2.63793	2.43963e-47	exon, promoter	TraesCS5D02G559900.1-E1
TraesCS5D02G560000	-8.6796	2.11587	Uncharacterized protein	5D	560880401	560880500	2.11587	0.000114409	promoter	promoter:TraesCS5D02G560000
TraesCS6A02G114300	-10.5467	3.19835	Proton_antipo_M domain-containing protein	6A	84400901	84401400	3.19835	0.0034275	exon, promoter	TraesCS6A02G114300.1-E3
TraesCS6A02G184700	#NAME?	2.28136	Uncharacterized protein	6A	215595901	215596000	2.28136	9.27888e-16	promoter	promoter:TraesCS6A02G184700
TraesCS6A02G184800	-11.8498	2.54132	Proton_antipo_M domain-containing protein	6A	215598201	215598400	2.54132	2.08123e-14	exon	TraesCS6A02G184800.1-E2
TraesCS6A02G192100	-9.76455	2.21947	Uncharacterized protein	6A	260117501	260117600	2.21947	1.14688e-15	exon	TraesCS6A02G192100.1-E1
TraesCS6A02G194000	-7.71065	3.06386	RPOLD domain-containing protein	6A	271182201	271182300	3.06386	0.000276113	exon, promoter	TraesCS6A02G194000.1-E3
TraesCS6A02G194100	#NAME?	3.35381	Uncharacterized protein	6A	271184501	271184700	3.35381	1.33541e-07	exon	TraesCS6A02G194100.1-E1
TraesCS6A02G397100	-8.53924	2.93918	MttB (MttB protein)	6A	608873201	608873400	2.93918	0.000980413	exon	TraesCS6A02G397100	MttB (MttB protein)
TraesCS6A02G397200	-8.73346	2.77119	Uncharacterized protein	6A	608877801	608881700	2.77119	6.66138e-05	exon, three_prime_UTR	TraesCS6A02G397200.1-E1
TraesCS6B02G031900	-7.1367	2.01127	Uncharacterized protein	6B	18748201	18748300	2.01127	6.03818e-12	promoter	promoter:TraesCS6B02G031900
TraesCS6B02G038000	#NAME?	4.61521	S4 RNA-binding domain-containing protein	6B	22427901	22428000	4.61521	1.53628e-05	exon, promoter	TraesCS6B02G038000.1-E1
TraesCS6B02G131700	-12.373	2.93918	Uncharacterized protein	6B	128890201	128890400	2.93918	0.000980413	exon	TraesCS6B02G131700.1-E1
TraesCS6B02G131800	-7.67103	2.48356	Uncharacterized protein	6B	128904601	128904800	2.48356	0.00636217	exon	TraesCS6B02G131800.1-E1
TraesCS6B02G131900	#NAME?	3.48559	Uncharacterized protein	6B	128915801	128916000	3.48559	0.000980413	exon	TraesCS6B02G131900.1-E1
TraesCS6B02G208100	-12.406	3.02998	Uncharacterized protein	6B	267065301	267065800	3.02998	0.0117402	exon	TraesCS6B02G208100.1-E1
TraesCS6B02G220100	-11.3872	2.12293	Uncharacterized protein	6B	311353801	311354000	2.12293	2.09641e-06	intron	Parent=transcript:TraesCS6B02G220100.1_1
TraesCS6B02G250900	-10.4028	2.46705	Uncharacterized protein	6B	450089201	450089300	2.46705	1.40513e-19	exon, promoter	TraesCS6B02G250900.1-E1
TraesCS6B02G338800	#NAME?	2.48356	NADH-ubiquinone oxidoreductase chain 3 (EC 7.1.1.2)	6B	596656101	596656200	2.48356	0.00636217	exon	TraesCS6B02G338800	NADH-ubiquinone oxidoreductase chain 3 (EC 7.1.1.-) (EC 7.1.1.2)
TraesCS6D02G057600	-10.919	2.42256	Uncharacterized protein	6D	27417901	27418000	2.42256	1.39485e-20	exon	TraesCS6D02G057600.1-E1
TraesCS6D02G079700	-7.95114	2.96908	Uncharacterized protein	6D	45511501	45511600	2.96908	1.63777e-41	promoter	promoter:TraesCS6D02G079700
TraesCS6D02G079800	-9.19161	2.76298	Maturase K	6D	45515001	45515400	2.76298	2.77623e-05	exon, promoter	TraesCS6D02G079800	Maturase K
TraesCS6D02G158700	-10.4914	2.54634	Proton_antipo_M domain-containing protein	6D	135458301	135458400	2.54634	2.77623e-05	exon	TraesCS6D02G158700.1-E1
TraesCS6D02G158900	#NAME?	2.95591	Uncharacterized protein	6D	135462401	135462800	2.95591	2.3909e-27	exon	TraesCS6D02G158900.1-E3	-
TraesCS6D02G175000	-7.89343	2.07961	Ribosomal_S3_C domain-containing protein	6D	168248901	168249500	2.07961	1.05558e-10	exon, promoter	TraesCS6D02G175000.1-E1	-
TraesCS6D02G175100	-7.68347	2.04304	Uncharacterized protein	6D	168249701	168249800	2.04304	1.88192e-23	exon	TraesCS6D02G175100.1-E1	-
TraesCS6D02G175200	#NAME?	2.08819	Ribosomal_L2_C domain-containing protein	6D	168250701	168250800	2.08819	0.0225028	exon	TraesCS6D02G175200.1-E1
TraesCS6D02G175600	#NAME?	2.341	Uncharacterized protein	6D	168256701	168256900	2.341	3.51258e-12	exon	TraesCS6D02G175600.1-E1
TraesCS6D02G325300	#NAME?	2.81697	Uncharacterized protein	6D	431396101	431396300	2.81697	8.66361e-29	exon, promoter	TraesCS6D02G325300.1-E1
TraesCS6D02G325600	#NAME?	2.93918	Uncharacterized protein	6D	431398801	431398900	2.93918	0.000980413	exon, promoter	TraesCS6D02G325600.1-E1
TraesCS6D02G325800	-14.5449	2.05314	Cytochrome b559 subunit alpha (PSII reaction center subunit V)	6D	431399401	431399500	2.05314	2.36514e-26	promoter	promoter:TraesCS6D02G325800
TraesCS6D02G326000	-13.1325	2.68057	Cytochrome b6-f complex subunit 5 (Cytochrome b6-f complex subunit PetG) (Cytochrome b6-f complex subunit V)	6D	431400601	431400700	2.68057	7.92326e-37	promoter	promoter:TraesCS6D02G326000
TraesCS7A02G011200	-10.0796	3.61027	Cytochrom_C_asm domain-containing protein	7A	4962401	4962500	3.61027	0.000276113	exon, promoter	TraesCS7A02G011200.1-E1
TraesCS7A02G098300	-10.3781	2.08819	ATP synthase subunit alpha	7A	60169601	60169700	2.08819	0.0225028	exon	TraesCS7A02G098300	ATP synthase subunit alpha
TraesCS7A02G099000	#NAME?	-6.26079	Uncharacterized protein	7A	60281601	60281700	-6.26079	0.0215151	intron	Parent=transcript:TraesCS7A02G099000.1_1
TraesCS7A02G165200	-9.51667	3.02998	Proton_antipo_M domain-containing protein	7A	120923101	120923200	3.02998	0.0117402	exon	TraesCS7A02G165200.1-E2
TraesCS7A02G230600	-4.64795	2.11616	Uncharacterized protein	7A	201367001	201367300	2.11616	1.59002e-29	exon, promoter	TraesCS7A02G230600.1-E1
TraesCS7A02G387500	-10.1211	2.14224	Uncharacterized protein	7A	563515301	563515500	2.14224	2.96972e-25	exon	TraesCS7A02G387500.1-E1
TraesCS7A02G526400	#NAME?	2.80269	Complex1_49kDa domain-containing protein	7A	708280701	708280800	2.80269	0.00183717	exon	TraesCS7A02G526400.1-E1
TraesCS7B02G080400	-11.0925	2.94084	Uncharacterized protein	7B	90401901	90402200	2.94084	2.32231e-07	exon	TraesCS7B02G080400.1-E1
TraesCS7B02G118000	-9.82175	2.20036	Uncharacterized protein	7B	137683801	137684300	2.20036	6.83568e-16	exon, promoter	TraesCS7B02G118000.1-E1
TraesCS7B02G395600	-8.50753	2.55886	4Fe-4S ferredoxin-type domain-containing protein	7B	662739201	662739300	2.55886	3.47505e-11	exon	TraesCS7B02G395600.1-E1
TraesCS7B02G429200	#NAME?	3.48559	Uncharacterized protein	7B	698126701	698126800	3.48559	0.000980413	exon	TraesCS7B02G429200.1-E1
TraesCS7B02G429600	#NAME?	2.09732	Orf359 protein	7B	698144101	698144200	2.09732	0.0213208	exon	TraesCS7B02G429600	Orf359 protein
TraesCS7B02G457100	#NAME?	3.02998	Uncharacterized protein	7B	716796201	716796500	3.02998	0.0117402	exon	TraesCS7B02G457100.1-E2
TraesCS7B02G457700	-6.80228	2.08819	Proton_antipo_M domain-containing protein	7B	716837401	716837600	2.08819	0.0225028	exon, promoter	TraesCS7B02G457700.1-E1
TraesCS7B02G487000	-15.9275	2.47325	Uncharacterized protein	7B	742936501	742936600	2.47325	0.000732495	exon	TraesCS7B02G487000.1-E1
TraesCS7B02G488300	-8.73997	2.08819	Uncharacterized protein	7B	743067501	743067600	2.08819	0.0225028	exon	TraesCS7B02G488300.1-E1
TraesCS7D02G123900	#NAME?	2.08819	Photosystem II reaction center protein I (PSII-I) (PSII 4.8 kDa protein)	7D	77242001	77242100	2.08819	0.0225028	exon	TraesCS7D02G123900	Photosystem II reaction center protein I (PSII-I) (PSII 4.8 kDa protein)
TraesCS7D02G254800	#NAME?	2.65193	Uncharacterized protein	7D	231546801	231547100	2.65193	0.0034275	exon, promoter	TraesCS7D02G254800.1-E1
TraesCS7D02G254900	-11.1614	2.06828	30S ribosomal protein S19, chloroplastic	7D	231547201	231547300	2.06828	2.39918e-45	exon	TraesCS7D02G254900	30S ribosomal protein S19, chloroplastic
TraesCS7D02G255200	-11.0925	2.11191	Oxidored_q6 domain-containing protein	7D	231565301	231565500	2.11191	4.34281e-14	exon	TraesCS7D02G255200.1-E1
TraesCS7D02G255700	-7.32311	2.32297	Uncharacterized protein	7D	231585501	231585700	2.32297	8.86744e-12	exon	TraesCS7D02G255700.1-E1
TraesCS7D02G255800	-7.58764	2.05923	Complex1_30kDa domain-containing protein	7D	231594801	231595000	2.05923	1.24847e-22	exon	TraesCS7D02G255800.1-E1
TraesCS7D02G256700	#NAME?	2.40597	Uncharacterized protein	7D	231624001	231624100	2.40597	1.49922e-51	exon, promoter	TraesCS7D02G256700.1-E2
TraesCS7D02G285800	-10.9089	2.10346	Uncharacterized protein	7D	307048601	307048700	2.10346	0.00444281	exon	TraesCS7D02G285800.1-E2
TraesCS7D02G533500	-8.87863	2.35849	Cytochrom_C_asm domain-containing protein	7D	626695801	626695900	2.35849	0.00444281	exon	TraesCS7D02G533500.1-E1
TraesCSU02G057400	#NAME?	2.48356	Uncharacterized protein	Un	45095301	45095600	2.48356	0.00636217	exon	TraesCSU02G057400.1-E1
TraesCSU02G106600	-9.83714	2.35753	Uncharacterized protein	Un	93408601	93408700	2.35753	2.87404e-10	promoter	promoter:TraesCSU02G106600
TraesCSU02G147900	-9.36382	2.23381	ATP-synt_ab domain-containing protein	Un	171054001	171054600	2.23381	0.00756354	exon	TraesCSU02G147900.1-E2
TraesCSU02G150100	-6.256	2.93918	Ribosomal protein S12 (Rps12) (Rps12 protein)	Un	182413301	182413500	2.93918	0.000980413	exon	TraesCSU02G150100	Ribosomal protein S12 (Rps12) (Rps12 protein)
TraesCSU02G157000	-6.48928	2.04175	Ribosomal protein S7	Un	216511401	216511500	2.04175	2.36537e-27	exon	TraesCSU02G157000.1-E1
TraesCSU02G157100	-10.5443	2.43975	Proton_antipo_M domain-containing protein	Un	216514001	216514300	2.43975	7.32195e-24	exon, intron	TraesCSU02G157100.1-E5
TraesCSU02G158100	-6.83511	2.28034	Ribosomal_S7 domain-containing protein	Un	217913801	217914000	2.28034	0.000181736	exon	TraesCSU02G158100.1-E1
TraesCSU02G174100	-9.19291	2.02064	ATP synthase subunit alpha	Un	261566901	261567000	2.02064	8.68461e-13	promoter	promoter:TraesCSU02G174100
TraesCSU02G174200	-8.8333	2.30943	Uncharacterized protein	Un	261567001	261567200	2.30943	6.81703e-12	exon	TraesCSU02G174200.1-E1
TraesCSU02G174300	#NAME?	2.70083	ATP-synt_C domain-containing protein	Un	261569101	261569200	2.70083	1.41719e-08	promoter	promoter:TraesCSU02G174300
TraesCSU02G177800	#NAME?	2.93918	S4 RNA-binding domain-containing protein	Un	267892801	267892900	2.93918	0.000980413	exon	TraesCSU02G177800.1-E1
TraesCSU02G182200	#NAME?	2.57955	Uncharacterized protein	Un	273327401	273327500	2.57955	0.000404902	exon	TraesCSU02G182200.1-E1
TraesCSU02G184800	-6.70632	2.37486	30S ribosomal protein S8, chloroplastic	Un	278886101	278886500	2.37486	6.25561e-43	exon	TraesCSU02G184800	30S ribosomal protein S8, chloroplastic
TraesCSU02G190100	-10.3415	2.42339	Proton_antipo_M domain-containing protein	Un	286269101	286269700	2.42339	1.92577e-37	exon	TraesCSU02G190100.1-E5
TraesCSU02G204300	-12.1614	2.88613	Uncharacterized protein	Un	303785201	303785300	2.88613	2.31603e-13	exon	TraesCSU02G204300.1-E1
TraesCSU02G221700	#NAME?	3.15749	NAD(P)H-quinone oxidoreductase subunit I, chloroplastic (EC 7.1.1.-)	Un	327662601	327663100	3.15749	3.75948e-08	exon	TraesCSU02G221700	NAD(P)H-quinone oxidoreductase subunit I, chloroplastic (EC 7.1.1.-)
TraesCSU02G237200	-10.8959	2.69382	Complex1_49kDa domain-containing protein	Un	351213501	351214500	2.69382	3.5273e-06	exon, promoter	TraesCSU02G237200.1-E3
TraesCSU02G237300	#NAME?	3.05199	30S ribosomal protein S15	Un	351214801	351215200	3.05199	9.41291e-17	exon, promoter	TraesCSU02G237300	30S ribosomal protein S15
TraesCSU02G238800	-9.08607	3.08783	30S ribosomal protein S15	Un	354743601	354744000	3.08783	5.70636e-68	promoter	TraesCSU02G238800	30S ribosomal protein S15
TraesCSU02G239700	-8.60342	2.09898	Uncharacterized protein	Un	357346201	357346300	2.09898	5.46078e-16	promoter	promoter:TraesCSU02G239700
TraesCSU02G245600	-9.25026	2.34858	NAD(P)H-quinone oxidoreductase subunit 4L, chloroplastic (EC 7.1.1.-) (NAD(P)H dehydrogenase subunit 4L) (NADH-plastoquinone oxidoreductase subunit 4L)	Un	371050201	371050400	2.34858	4.77407e-32	exon	TraesCSU02G245600	NAD(P)H-quinone oxidoreductase subunit 4L, chloroplastic (EC 7.1.1.-) (NAD(P)H dehydrogenase subunit 4L) (NADH-plastoquinone oxidoreductase subunit 4L)
TraesCSU02G246100	-3.73908	2.76203	Uncharacterized protein	Un	371791501	371791800	2.76203	3.72009e-37	exon, promoter	TraesCSU02G246100.1-E1	NAD(P)H-quinone oxidoreductase subunit 4L, chloroplastic (EC 7.1.1.-) (NAD(P)H dehydrogenase subunit 4L) (NADH-plastoquinone oxidoreductase subunit 4L)
TraesCSU02G247400	-9.30846	3.48559	Uncharacterized protein	Un	375322001	375322100	3.48559	0.000980413	exon	TraesCSU02G247400.1-E1
TraesCSU02G253100	#NAME?	2.48356	Uncharacterized protein	Un	389360501	389360800	2.48356	0.00636217	exon, promoter	TraesCSU02G253100.1-E1
TraesCSU02G255600	#NAME?	2.78324	Uncharacterized protein	Un	396206201	396206300	2.78324	0.000732495	promoter	promoter:TraesCSU02G255600
TraesCSU02G258800	-11.8322	2.39081	Cytochrome b6-f complex subunit 5 (Cytochrome b6-f complex subunit PetG) (Cytochrome b6-f complex subunit V)	Un	404958801	404958900	2.39081	1.58052e-45	promoter	promoter:TraesCSU02G258800
TraesCSU02G259500	-6.34481	2.19147	Ribosomal protein S7	Un	406475001	406475200	2.19147	0.000328077	exon	TraesCSU02G259500	Ribosomal protein S7
TraesCSU02G259800	-7.58128	2.02827	30S ribosomal protein S11, chloroplastic	Un	407707101	407707400	2.02827	3.49246e-28	exon, promoter	TraesCSU02G259800	30S ribosomal protein S11, chloroplastic
TraesCSU02G260800	#NAME?	2.69411	Uncharacterized protein	Un	412654201	412654500	2.69411	5.87009e-19	exon, promoter	promoter:TraesCSU02G260800
TraesCSU02G260900	#NAME?	2.97242	Photosystem I reaction center subunit IX (PSI-J)	Un	412876701	412876800	2.97242	1.60967e-12	promoter	promoter:TraesCSU02G260900
TraesCSU02G261700	-10.1761	2.15852	Uncharacterized protein	Un	416132701	416132900	2.15852	8.52581e-09	exon	TraesCSU02G261700.1-E1
TraesCSU02G262800	-3.7697	2.95295	Uncharacterized protein	Un	418304801	418304900	2.95295	4.77766e-17	exon	TraesCSU02G262800.1-E1
TraesCSU02G264600	-9.06008	2.64561	30S ribosomal protein S15	Un	430358201	430358600	2.64561	7.7239e-24	exon, promoter	TraesCSU02G264600	30S ribosomal protein S15
TraesCSU02G266100	#NAME?	2.78849	Photosystem I reaction center subunit IX (PSI-J)	Un	436277501	436277600	2.78849	9.0706e-54	exon	TraesCSU02G266100	Photosystem I reaction center subunit IX (PSI-J)
TraesCSU02G266300	-10.5277	-3.35178	Uncharacterized protein	Un	437696501	437696600	-3.35178	0.00258886	exon	TraesCSU02G266300.1-E1
TraesCSU02G266900	-11.7169	2.61086	ATP-dependent Clp protease proteolytic subunit	Un	440189801	440190100	2.61086	4.54762e-08	exon	TraesCSU02G266900	ATP-dependent Clp protease proteolytic subunit
TraesCSU02G267100	-6.33761	2.35734	Uncharacterized protein	Un	440227001	440227100	2.35734	2.21828e-23	promoter	promoter:TraesCSU02G267100
TraesCSU02G267200	-10.5429	-3.22718	Uncharacterized protein	Un	441000201	441000300	-3.22718	0.00444281	exon	TraesCSU02G267200.1-E1
TraesCSU02G267600	-12.8934	2.60321	50S ribosomal protein L20	Un	441827201	441827300	2.60321	0.000157883	promoter	promoter:TraesCSU02G267600
TraesCSU02G268800	#NAME?	2.54937	Photosystem I reaction center subunit IX (PSI-J)	Un	444993701	444993800	2.54937	5.35445e-30	promoter	promoter:TraesCSU02G268800
TraesCSU02G268900	-7.51648	2.58405	50S ribosomal protein L33, chloroplastic	Un	444994201	444994300	2.58405	2.60428e-28	promoter	promoter:TraesCSU02G268900
TraesCSU02G269000	-12.4808	2.344	ATP-synt_C domain-containing protein	Un	445187601	445188000	2.344	1.43424e-07	exon, promoter	TraesCSU02G269000.1-E1
TraesCSU02G269200	#NAME?	2.61319	Protein PsbN	Un	445811901	445812000	2.61319	5.88577e-28	exon	TraesCSU02G269200	Protein PsbN
TraesCSU02G269700	#NAME?	2.1959	Uncharacterized protein	Un	449932101	449932300	2.1959	1.03914e-16	exon	TraesCSU02G269700.1-E1
TraesCSU02G270200	-7.35553	2.10085	Uncharacterized protein	Un	453004101	453004200	2.10085	1.64425e-23	exon	TraesCSU02G270200.1-E1
TraesCSU02G270600	#NAME?	2.51489	Uncharacterized protein	Un	453775001	453775100	2.51489	2.5668e-07	exon	TraesCSU02G270600.1-E1
TraesCSU02G271200	-11.6687	-2.28033	Uncharacterized protein	Un	455858601	455858700	-2.28033	6.28972e-05	exon	TraesCSU02G271200.1-E1
