# Supplementary material for: Pathogen-induced alterations in methylome during Lr48-mediated APR in wheat (Triticum aestivum L.)&nbsp;
Source: Research Square preprint supplement (doi:10.21203/rs.3.rs-336817/v1), 2021-03-23
Supplement: Supplementary file 7 [file e8034399d3fd9113cdf819b4.xls]

## Sheet: Sheet1
Supplementary Table S22 List of differentially expressed genes (DEGs) in RNA-seq and differentially methylated regions DMRs) having p-value <=0.05 and log2FC ≥ 2 or ≤ −2 in R96 when compared to S96 in S96 vs R96.
Gene expression				Methylation
Gene ID	log2FoldChange	pval	Protein names	Chromosome	start	stop	logFC	p.value	type	Gene ID	Protein names
TraesCS1A02G001100	-2.18098	0.0248259	Uncharacterized protein	1A	280501	280700	3.1523	0.0117402	intron	TraesCS1A02G001100	Uncharacterized protein
TraesCS1B02G033000	2.70388	0.00906122	Uncharacterized protein	1B	16188201	16188300	3.1523	0.0117402	exon, three_prime_UTR	TraesCS1B02G033000	Uncharacterized protein
TraesCS2A02G240500	-2.29988	0.0204715	Uncharacterized protein	2A	335822501	335822600	2.81325	0.0023592	intron	TraesCS2A02G240500	Uncharacterized protein;
TraesCS3A02G405700	-2.04272	0.00188339	Uncharacterized protein	3A	650013001	650013100	2.05207	0.0213208	exon	TraesCS3A02G405700	Uncharacterized protein
TraesCS5A02G420900	-2.3211	0.000460829	Uncharacterized protein	5A	607272001	607272200	-2.64493	0.0074061	intron	TraesCS5A02G420900	Uncharacterized protein
TraesCS5A02G555500	-2.58351	5.62456e-05	Uncharacterized protein	5A	706871101	706871300	3.28817	0.00636217	intron	TraesCS5A02G555500	Uncharacterized protein
TraesCS6B02G117900	-2.07949	0.0440589	Uncharacterized protein	6B	111705701	111705800	7.24809	3.84742e-06	intron	TraesCS6B02G117900	Uncharacterized protein
TraesCS6B02G250700	-3.02291	0.000351378	Uncharacterized protein	6B	450083401	450083500	3.1523	0.0117402	exon	TraesCS6B02G250700	Uncharacterized protein
TraesCS7D02G256100	-2.32075	0.0299575	Uncharacterized protein	7D	231609101	231618000	-2.4064	0.0225028	intron	TraesCS7D02G256100	Uncharacterized protein
TraesCSU02G075700	-2.21643	7.7384e-05	Uncharacterized protein	Un	67492601	67492700	2.25668	0.00756354	intron	TraesCSU02G075700	Uncharacterized protein
TraesCSU02G260700	-2.21522	8.22492e-05	Uncharacterized protein	Un	412305901	412306000	2.19993	7.77013e-07	exon	TraesCSU02G260700	Uncharacterized protein
TraesCSU02G263900	-2.09804	0.0199388	Uncharacterized protein	Un	425723401	425725300	2.158	0.0127622	exon, intron	TraesCSU02G263900	Uncharacterized protein
TraesCSU02G266700	-2.90717	2.13241e-05	Uncharacterized protein	Un	439513001	439513100	2.33804	0.000916869	promoter	TraesCSU02G266700	Uncharacterized protein
TraesCSU02G267800	-2.06269	0.000496241	Uncharacterized protein	Un	442558801	442558900	2.49431	0.0129695	promoter	TraesCSU02G267800	Uncharacterized protein
TraesCSU02G269800	-3.03834	0.01309	Uncharacterized protein	Un	450312201	450312300	2.60864	0.0074061	promoter	TraesCSU02G269800	Uncharacterized protein
