# Supplementary material for: Pathogen-induced alterations in methylome during Lr48-mediated APR in wheat (Triticum aestivum L.)&nbsp;
Source: Research Square preprint supplement (doi:10.21203/rs.3.rs-336817/v1), 2021-03-23
Supplement: Supplementary file 8 [file f3d45e547a13330358ec8209.xls]

## Sheet: Sheet1
Supplementary Table S14. List of hypermethylated genes in R96 when compared to R0 in R0 vs R96 and their gene ontology analysis
Gene stable ID	GO term name	GO domain	GO term accession	Interpro Short Description
TraesCS1A02G111400	proteolysis	biological_process	GO:0006508	ClpP
TraesCS1A02G111400	proteolysis	biological_process	GO:0006508	ClpP_Ser_AS
TraesCS1A02G111400	proteolysis	biological_process	GO:0006508	ClpP/TepA
TraesCS1A02G111400	proteolysis	biological_process	GO:0006508	ClpP/crotonase-like_dom_sf
TraesCS1A02G130100	transcription, DNA-templated	biological_process	GO:0006351	DNA-dir_RNA_pol_insert
TraesCS1A02G130100	transcription, DNA-templated	biological_process	GO:0006351	DNA-dir_RNA_pol_RpoA/D/Rpb3
TraesCS1A02G130100	transcription, DNA-templated	biological_process	GO:0006351	RBP11-like
TraesCS1A02G130100	transcription, DNA-templated	biological_process	GO:0006351	RNApol_insert_sf
TraesCS1A02G157200	oxidation-reduction process	biological_process	GO:0055114	ND/Mrp_mem
TraesCS1A02G157200	oxidation-reduction process	biological_process	GO:0055114	NADH-Q_OxRdtase_suN/2
TraesCS1A02G157200	ATP synthesis coupled electron transport	biological_process	GO:0042773	ND/Mrp_mem
TraesCS1A02G157200	ATP synthesis coupled electron transport	biological_process	GO:0042773	NADH-Q_OxRdtase_suN/2
TraesCS1A02G157200	photosynthesis, light reaction	biological_process	GO:0019684	ND/Mrp_mem
TraesCS1A02G157200	photosynthesis, light reaction	biological_process	GO:0019684	NADH-Q_OxRdtase_suN/2
TraesCS1A02G384400	oxidation-reduction process	biological_process	GO:0055114	NADH_UbQ/plastoQ_OxRdtase_su3
TraesCS1A02G384400	oxidation-reduction process	biological_process	GO:0055114	NAD(P)H_OxRDtase_bac/plastid
TraesCS1A02G384400	oxidation-reduction process	biological_process	GO:0055114	NDAH_ubi_oxred_su3_sf
TraesCS1A02G384400	photosynthesis, light reaction	biological_process	GO:0019684	NADH_UbQ/plastoQ_OxRdtase_su3
TraesCS1A02G384400	photosynthesis, light reaction	biological_process	GO:0019684	NAD(P)H_OxRDtase_bac/plastid
TraesCS1A02G384400	photosynthesis, light reaction	biological_process	GO:0019684	NDAH_ubi_oxred_su3_sf
TraesCS1A02G384500	oxidation-reduction process	biological_process	GO:0055114	NADH_UbQ_OxRdtase-like_20kDa
TraesCS1A02G384500	oxidation-reduction process	biological_process	GO:0055114	NADH_UQ_OxRdtase_20Kd_su
TraesCS1A02G384600	photosynthesis	biological_process	GO:0015979	PSII_PsbK
TraesCS1A02G384600	photosynthesis	biological_process	GO:0015979	PSII_PsbK_sf
TraesCS1A02G385000	photosynthesis	biological_process	GO:0015979	PSI_PsaI
TraesCS1A02G385000	photosynthesis	biological_process	GO:0015979	PSI_PsaI_sf
TraesCS1A02G433800	translation	biological_process	GO:0006412	Ribosomal_L16
TraesCS1A02G433800	translation	biological_process	GO:0006412	Ribosomal_L10e/L16
TraesCS1A02G433800	translation	biological_process	GO:0006412	Ribosomal_L16_CS
TraesCS1A02G433800	translation	biological_process	GO:0006412	Ribosomal_L10e/L16_sf
TraesCS1B02G047700	regulation of transcription, DNA-templated	biological_process	GO:0006355	MTERF
TraesCS1B02G047700	regulation of transcription, DNA-templated	biological_process	GO:0006355	MTERF_sf
TraesCS1B02G087800	oxidation-reduction process	biological_process	GO:0055114	NADH_UbQ_OxRdtase_su1/FPO
TraesCS1B02G189100	photosynthesis	biological_process	GO:0015979	PSI_PsaA/B
TraesCS1B02G189100	photosynthesis	biological_process	GO:0015979	PSI_PsaA
TraesCS1B02G189100	photosynthesis	biological_process	GO:0015979	PSI_PsaA/B_CS
TraesCS1B02G189100	photosynthesis	biological_process	GO:0015979	PSI_PsaA/B_sf
TraesCS1B02G317700	photosynthesis	biological_process	GO:0015979	PSII_PsbZ
TraesCS1B02G317700	photosynthesis	biological_process	GO:0015979	PSII_PsbZ_sf
TraesCS1B02G317700	photosystem II stabilization	biological_process	GO:0042549	PSII_PsbZ
TraesCS1B02G317700	photosystem II stabilization	biological_process	GO:0042549	PSII_PsbZ_sf
TraesCS1B02G352900	ATP synthesis coupled proton transport	biological_process	GO:0015986	ATP_synth_F0_asu
TraesCS1B02G352900	ATP synthesis coupled proton transport	biological_process	GO:0015986	ATP_synth_F0_asu_AS
TraesCS1B02G352900	ATP synthesis coupled proton transport	biological_process	GO:0015986	F0_ATP_A_sf
TraesCS1B02G385600	oxidation-reduction process	biological_process	GO:0055114	ND/Mrp_mem
TraesCS1B02G385600	oxidation-reduction process	biological_process	GO:0055114	NADH-Q_OxRdtase_suN/2
TraesCS1B02G385600	ATP synthesis coupled electron transport	biological_process	GO:0042773	ND/Mrp_mem
TraesCS1B02G385600	ATP synthesis coupled electron transport	biological_process	GO:0042773	NADH-Q_OxRdtase_suN/2
TraesCS1B02G404500	photosynthesis	biological_process	GO:0015979	PSII_PsbZ
TraesCS1B02G404500	photosynthesis	biological_process	GO:0015979	PSII_PsbZ_sf
TraesCS1B02G404500	photosystem II stabilization	biological_process	GO:0042549	PSII_PsbZ
TraesCS1B02G404500	photosystem II stabilization	biological_process	GO:0042549	PSII_PsbZ_sf
TraesCS1B02G404700	ATP synthesis coupled proton transport	biological_process	GO:0015986	ATP_synth_F0_asu
TraesCS1B02G404700	ATP synthesis coupled proton transport	biological_process	GO:0015986	F0_ATP_A_sf
TraesCS1B02G404900	ATP synthesis coupled proton transport	biological_process	GO:0015986	ATP_synth_F0_csu
TraesCS1B02G404900	ATP synthesis coupled proton transport	biological_process	GO:0015986	ATPase_proteolipid_c-like_dom
TraesCS1B02G404900	ATP synthesis coupled proton transport	biological_process	GO:0015986	ATP_synth_csu_bac/chlpt
TraesCS1B02G404900	ATP synthesis coupled proton transport	biological_process	GO:0015986	F/V-ATP_Csub_sf
TraesCS1B02G404900	ATP synthesis coupled proton transport	biological_process	GO:0015986	ATP_synth_F0_csu_sf
TraesCS1B02G404900	proton transmembrane transport	biological_process	GO:1902600	ATP_synth_F0_csu
TraesCS1B02G404900	proton transmembrane transport	biological_process	GO:1902600	ATPase_proteolipid_c-like_dom
TraesCS1B02G404900	proton transmembrane transport	biological_process	GO:1902600	ATP_synth_csu_bac/chlpt
TraesCS1B02G404900	proton transmembrane transport	biological_process	GO:1902600	F/V-ATP_Csub_sf
TraesCS1B02G404900	proton transmembrane transport	biological_process	GO:1902600	ATP_synth_F0_csu_sf
TraesCS1B02G405000	ATP synthesis coupled proton transport	biological_process	GO:0015986	ATP_synth_b/b'su_bac/chlpt
TraesCS1B02G405000	ion transport	biological_process	GO:0006811	ATP_synth_b/b'su_bac/chlpt
TraesCS1B02G405200	ATP synthesis coupled proton transport	biological_process	GO:0015986	ATPase_F1/V1/A1_a/bsu_nucl-bd
TraesCS1B02G405200	ATP synthesis coupled proton transport	biological_process	GO:0015986	ATP_synth_asu_C
TraesCS1B02G405200	ATP synthesis coupled proton transport	biological_process	GO:0015986	ATPase_a/bsu_AS
TraesCS1B02G405200	ATP synthesis coupled proton transport	biological_process	GO:0015986	P-loop_NTPase
TraesCS1B02G405200	ATP synthesis coupled proton transport	biological_process	GO:0015986	ATP_synth_asu_C_sf
TraesCS1B02G405500	oxidation-reduction process	biological_process	GO:0055114	NADH_UbQ/plastoQ_OxRdtase_su6
TraesCS1B02G405500	oxidation-reduction process	biological_process	GO:0055114	Nuo/plastoQ_OxRdtase_6_NuoJ
TraesCS1B02G405600	oxidation-reduction process	biological_process	GO:0055114	NADH_plast_OxRdtase_su_I
TraesCS1B02G405600	oxidation-reduction process	biological_process	GO:0055114	NADH_quinone_OxRdtase_chainI
TraesCS1B02G405600	oxidation-reduction process	biological_process	GO:0055114	4Fe4S_Fe-S-bd
TraesCS1B02G405600	oxidation-reduction process	biological_process	GO:0055114	4Fe4S_Fe_S_CS
TraesCS1B02G405700	oxidation-reduction process	biological_process	GO:0055114	NADH_UbQ_OxRdtase_su1/FPO
TraesCS1B02G405800	oxidation-reduction process	biological_process	GO:0055114	NADH_UbQ_OxRdtase_su1/FPO
TraesCS1B02G405800	oxidation-reduction process	biological_process	GO:0055114	NADH_UbQ_OxRdtase_su1_CS
TraesCS1B02G405900	oxidation-reduction process	biological_process	GO:0055114	NADH_Q_OxRdtase_suD
TraesCS1B02G405900	oxidation-reduction process	biological_process	GO:0055114	NiFe-Hase_large
TraesCS1B02G405900	oxidation-reduction process	biological_process	GO:0055114	NADH_Q_OxRdtase_suD_sf
TraesCS1B02G406000	translation	biological_process	GO:0006412	Ribosomal_S15
TraesCS1B02G406000	translation	biological_process	GO:0006412	Ribosomal_S15_bac-type
TraesCS1B02G406000	translation	biological_process	GO:0006412	S15_NS1_RNA-bd
TraesCS1B02G406700	oxidation-reduction process	biological_process	GO:0055114	ND/Mrp_mem
TraesCS1B02G406700	ATP synthesis coupled electron transport	biological_process	GO:0042773	ND/Mrp_mem
TraesCS1B02G406700	photosynthesis, light reaction	biological_process	GO:0019684	ND/Mrp_mem
TraesCS1B02G413000	respiratory electron transport chain	biological_process	GO:0022904	Cyt_b/b6_N
TraesCS1B02G413000	respiratory electron transport chain	biological_process	GO:0022904	Cyt_b/b6_C
TraesCS1B02G413000	respiratory electron transport chain	biological_process	GO:0022904	Di-haem_cyt_TM
TraesCS1B02G413000	respiratory electron transport chain	biological_process	GO:0022904	Cytb/b6-like_sf
TraesCS1B02G413000	respiratory electron transport chain	biological_process	GO:0022904	Cyt_b/b6_C_sf
TraesCS1D02G070500	ATP synthesis coupled proton transport	biological_process	GO:0015986	ATP_synth_b/b'su_bac/chlpt
TraesCS1D02G071200	photosynthesis	biological_process	GO:0015979	PSII_PsbK
TraesCS1D02G071200	photosynthesis	biological_process	GO:0015979	PSII_PsbK_sf
TraesCS1D02G071300	mRNA processing	biological_process	GO:0006397	Maturase_MatK
TraesCS1D02G071300	mRNA processing	biological_process	GO:0006397	Maturase_MatK_N
TraesCS1D02G130500	translation	biological_process	GO:0006412	Ribosomal_S8
TraesCS1D02G130500	translation	biological_process	GO:0006412	Ribosomal_S8_sf
TraesCS1D02G149600	photosynthetic electron transport chain	biological_process	GO:0009767	Cyt_b/b6_C
TraesCS1D02G149600	photosynthetic electron transport chain	biological_process	GO:0009767	Cyt_b6/f_cplx_suIV
TraesCS1D02G149600	photosynthetic electron transport chain	biological_process	GO:0009767	Cyt_b/b6_C_sf
TraesCS1D02G149600	oxidation-reduction process	biological_process	GO:0055114	Cyt_b/b6_C
TraesCS1D02G149600	oxidation-reduction process	biological_process	GO:0055114	Cyt_b6/f_cplx_suIV
TraesCS1D02G149600	oxidation-reduction process	biological_process	GO:0055114	Cyt_b/b6_C_sf
TraesCS1D02G149600	photosynthesis	biological_process	GO:0015979	Cyt_b/b6_C
TraesCS1D02G149600	photosynthesis	biological_process	GO:0015979	Cyt_b6/f_cplx_suIV
TraesCS1D02G149600	photosynthesis	biological_process	GO:0015979	Cyt_b/b6_C_sf
TraesCS1D02G179200	oxidation-reduction process	biological_process	GO:0055114	ND/Mrp_mem
TraesCS1D02G179200	oxidation-reduction process	biological_process	GO:0055114	NADH-Q_OxRdtase_suN/2
TraesCS1D02G179200	ATP synthesis coupled electron transport	biological_process	GO:0042773	ND/Mrp_mem
TraesCS1D02G179200	ATP synthesis coupled electron transport	biological_process	GO:0042773	NADH-Q_OxRdtase_suN/2
TraesCS1D02G179700	translation	biological_process	GO:0006412	Ribosomal_L2
TraesCS1D02G179700	translation	biological_process	GO:0006412	Ribosomal_L2_bac/org-type
TraesCS1D02G179700	translation	biological_process	GO:0006412	Translation_prot_SH3-like_sf
TraesCS1D02G179700	translation	biological_process	GO:0006412	Rib_L2_dom2
TraesCS1D02G179700	translation	biological_process	GO:0006412	Ribosomal_L2_dom3
TraesCS1D02G179700	translation	biological_process	GO:0006412	Ribosomal_L2_C
TraesCS1D02G179700	translation	biological_process	GO:0006412	Ribosomal_L2_CS
TraesCS1D02G179800	translation	biological_process	GO:0006412	Ribosomal_S19
TraesCS1D02G179800	translation	biological_process	GO:0006412	Ribosomal_S19_bac-type
TraesCS1D02G179800	translation	biological_process	GO:0006412	Ribosomal_S19_CS
TraesCS1D02G179800	translation	biological_process	GO:0006412	Ribosomal_S19_SF
TraesCS1D02G180000	mRNA processing	biological_process	GO:0006397	Maturase_MatK
TraesCS1D02G180000	mRNA processing	biological_process	GO:0006397	Maturase_MatK_N
TraesCS1D02G180000	tRNA processing	biological_process	GO:0008033	Maturase_MatK
TraesCS1D02G180000	tRNA processing	biological_process	GO:0008033	Maturase_MatK_N
TraesCS1D02G180200	photosynthesis	biological_process	GO:0015979	PSII_PsbI
TraesCS1D02G180200	photosynthesis	biological_process	GO:0015979	PSII_PsbI_sf
TraesCS1D02G180400	photosynthesis	biological_process	GO:0015979	PSII_PsbZ
TraesCS1D02G180400	photosynthesis	biological_process	GO:0015979	PSII_PsbZ_sf
TraesCS1D02G180400	photosystem II stabilization	biological_process	GO:0042549	PSII_PsbZ
TraesCS1D02G180400	photosystem II stabilization	biological_process	GO:0042549	PSII_PsbZ_sf
TraesCS1D02G180500	photosynthesis	biological_process	GO:0015979	PSII_PsbM
TraesCS1D02G180500	photosynthesis	biological_process	GO:0015979	PSII_PsbM_sf
TraesCS1D02G180500	photosynthesis, light reaction	biological_process	GO:0019684	PSII_PsbM
TraesCS1D02G180500	photosynthesis, light reaction	biological_process	GO:0019684	PSII_PsbM_sf
TraesCS1D02G180800	ATP synthesis coupled proton transport	biological_process	GO:0015986	ATP_synth_F0_csu
TraesCS1D02G180800	ATP synthesis coupled proton transport	biological_process	GO:0015986	ATPase_proteolipid_c-like_dom
TraesCS1D02G180800	ATP synthesis coupled proton transport	biological_process	GO:0015986	ATP_synth_csu_bac/chlpt
TraesCS1D02G180800	ATP synthesis coupled proton transport	biological_process	GO:0015986	ATP_synth_F0_csu_DDCD_BS
TraesCS1D02G180800	ATP synthesis coupled proton transport	biological_process	GO:0015986	F/V-ATP_Csub_sf
TraesCS1D02G180800	ATP synthesis coupled proton transport	biological_process	GO:0015986	ATP_synth_F0_csu_sf
TraesCS1D02G180800	proton transmembrane transport	biological_process	GO:1902600	ATP_synth_F0_csu
TraesCS1D02G180800	proton transmembrane transport	biological_process	GO:1902600	ATPase_proteolipid_c-like_dom
TraesCS1D02G180800	proton transmembrane transport	biological_process	GO:1902600	ATP_synth_csu_bac/chlpt
TraesCS1D02G180800	proton transmembrane transport	biological_process	GO:1902600	ATP_synth_F0_csu_DDCD_BS
TraesCS1D02G180800	proton transmembrane transport	biological_process	GO:1902600	F/V-ATP_Csub_sf
TraesCS1D02G180800	proton transmembrane transport	biological_process	GO:1902600	ATP_synth_F0_csu_sf
TraesCS1D02G180800	ATP biosynthetic process	biological_process	GO:0006754	ATP_synth_F0_csu
TraesCS1D02G180800	ATP biosynthetic process	biological_process	GO:0006754	ATPase_proteolipid_c-like_dom
TraesCS1D02G180800	ATP biosynthetic process	biological_process	GO:0006754	ATP_synth_csu_bac/chlpt
TraesCS1D02G180800	ATP biosynthetic process	biological_process	GO:0006754	ATP_synth_F0_csu_DDCD_BS
TraesCS1D02G180800	ATP biosynthetic process	biological_process	GO:0006754	F/V-ATP_Csub_sf
TraesCS1D02G180800	ATP biosynthetic process	biological_process	GO:0006754	ATP_synth_F0_csu_sf
TraesCS1D02G180800	ion transport	biological_process	GO:0006811	ATP_synth_F0_csu
TraesCS1D02G180800	ion transport	biological_process	GO:0006811	ATPase_proteolipid_c-like_dom
TraesCS1D02G180800	ion transport	biological_process	GO:0006811	ATP_synth_csu_bac/chlpt
TraesCS1D02G180800	ion transport	biological_process	GO:0006811	ATP_synth_F0_csu_DDCD_BS
TraesCS1D02G180800	ion transport	biological_process	GO:0006811	F/V-ATP_Csub_sf
TraesCS1D02G180800	ion transport	biological_process	GO:0006811	ATP_synth_F0_csu_sf
TraesCS1D02G180900	ATP synthesis coupled proton transport	biological_process	GO:0015986	ATP_synth_b/b'su_bac/chlpt
TraesCS1D02G181100	photosynthesis	biological_process	GO:0015979	PSI_PsaA/B
TraesCS1D02G181100	photosynthesis	biological_process	GO:0015979	PSI_PsaB
TraesCS1D02G181100	photosynthesis	biological_process	GO:0015979	PSI_PsaA/B_CS
TraesCS1D02G181100	photosynthesis	biological_process	GO:0015979	PSI_PsaA/B_sf
TraesCS1D02G181300	oxidation-reduction process	biological_process	GO:0055114	NADH_UbQ_OxRdtase-like_20kDa
TraesCS1D02G181300	oxidation-reduction process	biological_process	GO:0055114	NADH_UQ_OxRdtase_20Kd_su
TraesCS1D02G181700	photosynthesis	biological_process	GO:0015979	PSI_Ycf4_assembly
TraesCS1D02G182100	photosynthesis	biological_process	GO:0015979	PSII_cyt_b559_CS
TraesCS1D02G182100	photosynthesis	biological_process	GO:0015979	PSII_cyt_b559_asu
TraesCS1D02G182100	photosynthesis	biological_process	GO:0015979	PSII_cyt_b559_N
TraesCS1D02G182100	photosynthesis	biological_process	GO:0015979	PSII_cytb559_asu_lum
TraesCS1D02G182100	photosynthesis	biological_process	GO:0015979	PSII_cyt_b559_asu_sf
TraesCS1D02G182100	photosynthetic electron transport chain	biological_process	GO:0009767	PSII_cyt_b559_CS
TraesCS1D02G182100	photosynthetic electron transport chain	biological_process	GO:0009767	PSII_cyt_b559_asu
TraesCS1D02G182100	photosynthetic electron transport chain	biological_process	GO:0009767	PSII_cyt_b559_N
TraesCS1D02G182100	photosynthetic electron transport chain	biological_process	GO:0009767	PSII_cytb559_asu_lum
TraesCS1D02G182100	photosynthetic electron transport chain	biological_process	GO:0009767	PSII_cyt_b559_asu_sf
TraesCS1D02G182100	photosynthesis, light reaction	biological_process	GO:0019684	PSII_cyt_b559_CS
TraesCS1D02G182100	photosynthesis, light reaction	biological_process	GO:0019684	PSII_cyt_b559_asu
TraesCS1D02G182100	photosynthesis, light reaction	biological_process	GO:0019684	PSII_cyt_b559_N
TraesCS1D02G182100	photosynthesis, light reaction	biological_process	GO:0019684	PSII_cytb559_asu_lum
TraesCS1D02G182100	photosynthesis, light reaction	biological_process	GO:0019684	PSII_cyt_b559_asu_sf
TraesCS1D02G182400	photosynthesis	biological_process	GO:0015979	PSI_PsaJ
TraesCS1D02G182400	photosynthesis	biological_process	GO:0015979	PSI_PsaJ_sf
TraesCS1D02G182500	proteolysis	biological_process	GO:0006508	ClpP
TraesCS1D02G182500	proteolysis	biological_process	GO:0006508	ClpP_Ser_AS
TraesCS1D02G182500	proteolysis	biological_process	GO:0006508	ClpP/TepA
TraesCS1D02G182500	proteolysis	biological_process	GO:0006508	ClpP/crotonase-like_dom_sf
TraesCS1D02G182500	proteolysis	biological_process	GO:0006508	ClpP_His_AS
TraesCS1D02G182900	photosynthesis	biological_process	GO:0015979	PSII_PsbH
TraesCS1D02G182900	photosynthesis	biological_process	GO:0015979	PSII_PsbH_sf
TraesCS1D02G182900	protein stabilization	biological_process	GO:0050821	PSII_PsbH
TraesCS1D02G182900	protein stabilization	biological_process	GO:0050821	PSII_PsbH_sf
TraesCS1D02G183000	respiratory electron transport chain	biological_process	GO:0022904	Cyt_b/b6_N
TraesCS1D02G183000	respiratory electron transport chain	biological_process	GO:0022904	Di-haem_cyt_TM
TraesCS1D02G183000	respiratory electron transport chain	biological_process	GO:0022904	Cyt_B6_PetB
TraesCS1D02G183000	respiratory electron transport chain	biological_process	GO:0022904	Cytb/b6-like_sf
TraesCS1D02G183000	oxidation-reduction process	biological_process	GO:0055114	Cyt_b/b6_N
TraesCS1D02G183000	oxidation-reduction process	biological_process	GO:0055114	Di-haem_cyt_TM
TraesCS1D02G183000	oxidation-reduction process	biological_process	GO:0055114	Cyt_B6_PetB
TraesCS1D02G183000	oxidation-reduction process	biological_process	GO:0055114	Cytb/b6-like_sf
TraesCS1D02G183000	photosynthesis	biological_process	GO:0015979	Cyt_b/b6_N
TraesCS1D02G183000	photosynthesis	biological_process	GO:0015979	Di-haem_cyt_TM
TraesCS1D02G183000	photosynthesis	biological_process	GO:0015979	Cyt_B6_PetB
TraesCS1D02G183000	photosynthesis	biological_process	GO:0015979	Cytb/b6-like_sf
TraesCS1D02G183200	translation	biological_process	GO:0006412	Ribosomal_L14P
TraesCS1D02G183200	translation	biological_process	GO:0006412	Ribosomal_L14P_bac-type
TraesCS1D02G183200	translation	biological_process	GO:0006412	Ribosomal_L14P_CS
TraesCS1D02G183200	translation	biological_process	GO:0006412	Ribosomal_L14_sf
TraesCS1D02G183400	translation	biological_process	GO:0006412	Ribosomal_L22
TraesCS1D02G183400	translation	biological_process	GO:0006412	Ribosomal_L22_bac/chlpt-type
TraesCS1D02G183400	translation	biological_process	GO:0006412	Ribosomal_L22/L17_sf
TraesCS1D02G183900	translation	biological_process	GO:0006412	Ribosomal_S15
TraesCS1D02G183900	translation	biological_process	GO:0006412	Ribosomal_S15_bac-type
TraesCS1D02G183900	translation	biological_process	GO:0006412	S15_NS1_RNA-bd
TraesCS1D02G184000	oxidation-reduction process	biological_process	GO:0055114	NADH_Q_OxRdtase_suD
TraesCS1D02G184000	oxidation-reduction process	biological_process	GO:0055114	NADH_UbQ_OxRdtase_49kDa_CS
TraesCS1D02G184000	oxidation-reduction process	biological_process	GO:0055114	NDH1_su_D/H
TraesCS1D02G184000	oxidation-reduction process	biological_process	GO:0055114	NiFe-Hase_large
TraesCS1D02G184000	oxidation-reduction process	biological_process	GO:0055114	NADH_Q_OxRdtase_suD_sf
TraesCS1D02G193600	ATP synthesis coupled proton transport	biological_process	GO:0015986	ATPase_F1/V1/A1_a/bsu_nucl-bd
TraesCS1D02G193600	ATP synthesis coupled proton transport	biological_process	GO:0015986	ATP_synth_asu_C
TraesCS1D02G193600	ATP synthesis coupled proton transport	biological_process	GO:0015986	ATPase_F1/V1/A1_a/bsu_N
TraesCS1D02G193600	ATP synthesis coupled proton transport	biological_process	GO:0015986	ATP_synth_F1_asu
TraesCS1D02G193600	ATP synthesis coupled proton transport	biological_process	GO:0015986	ATPase_a/bsu_AS
TraesCS1D02G193600	ATP synthesis coupled proton transport	biological_process	GO:0015986	ATP_synth_asu-like_sf
TraesCS1D02G193600	ATP synthesis coupled proton transport	biological_process	GO:0015986	P-loop_NTPase
TraesCS1D02G193600	ATP synthesis coupled proton transport	biological_process	GO:0015986	ATP_synth_F1_a
TraesCS1D02G193600	ATP synthesis coupled proton transport	biological_process	GO:0015986	ATPase_F1/V1/A1_a/bsu_N_sf
TraesCS1D02G193600	ATP synthesis coupled proton transport	biological_process	GO:0015986	ATP_synth_asu_C_sf
TraesCS1D02G193600	ATP metabolic process	biological_process	GO:0046034	ATPase_F1/V1/A1_a/bsu_nucl-bd
TraesCS1D02G193600	ATP metabolic process	biological_process	GO:0046034	ATP_synth_asu_C
TraesCS1D02G193600	ATP metabolic process	biological_process	GO:0046034	ATPase_F1/V1/A1_a/bsu_N
TraesCS1D02G193600	ATP metabolic process	biological_process	GO:0046034	ATP_synth_F1_asu
TraesCS1D02G193600	ATP metabolic process	biological_process	GO:0046034	ATPase_a/bsu_AS
TraesCS1D02G193600	ATP metabolic process	biological_process	GO:0046034	ATP_synth_asu-like_sf
TraesCS1D02G193600	ATP metabolic process	biological_process	GO:0046034	P-loop_NTPase
TraesCS1D02G193600	ATP metabolic process	biological_process	GO:0046034	ATP_synth_F1_a
TraesCS1D02G193600	ATP metabolic process	biological_process	GO:0046034	ATPase_F1/V1/A1_a/bsu_N_sf
TraesCS1D02G193600	ATP metabolic process	biological_process	GO:0046034	ATP_synth_asu_C_sf
TraesCS1D02G193600	proton transmembrane transport	biological_process	GO:1902600	ATPase_F1/V1/A1_a/bsu_nucl-bd
TraesCS1D02G193600	proton transmembrane transport	biological_process	GO:1902600	ATP_synth_asu_C
TraesCS1D02G193600	proton transmembrane transport	biological_process	GO:1902600	ATPase_F1/V1/A1_a/bsu_N
TraesCS1D02G193600	proton transmembrane transport	biological_process	GO:1902600	ATP_synth_F1_asu
TraesCS1D02G193600	proton transmembrane transport	biological_process	GO:1902600	ATPase_a/bsu_AS
TraesCS1D02G193600	proton transmembrane transport	biological_process	GO:1902600	ATP_synth_asu-like_sf
TraesCS1D02G193600	proton transmembrane transport	biological_process	GO:1902600	P-loop_NTPase
TraesCS1D02G193600	proton transmembrane transport	biological_process	GO:1902600	ATP_synth_F1_a
TraesCS1D02G193600	proton transmembrane transport	biological_process	GO:1902600	ATPase_F1/V1/A1_a/bsu_N_sf
TraesCS1D02G193600	proton transmembrane transport	biological_process	GO:1902600	ATP_synth_asu_C_sf
TraesCS1D02G205100	oxidation-reduction process	biological_process	GO:0055114	NADH_UbQ_OxRdtase-like_20kDa
TraesCS1D02G205100	oxidation-reduction process	biological_process	GO:0055114	NADH_UQ_OxRdtase_20Kd_su
TraesCS1D02G295600	translation	biological_process	GO:0006412	Ribosomal_L33
TraesCS1D02G295600	translation	biological_process	GO:0006412	Ribosomal_zn-bd
TraesCS1D02G295600	translation	biological_process	GO:0006412	Ribosomal_L33_CS
TraesCS1D02G295600	translation	biological_process	GO:0006412	L33_sf
TraesCS1D02G435100	proteolysis	biological_process	GO:0006508	ClpP
TraesCS1D02G435100	proteolysis	biological_process	GO:0006508	ClpP/TepA
TraesCS1D02G435100	proteolysis	biological_process	GO:0006508	ClpP/crotonase-like_dom_sf
TraesCS1D02G435100	proteolysis	biological_process	GO:0006508	ClpP_His_AS
TraesCS1D02G435200	translation	biological_process	GO:0006412	Ribosomal_S18
TraesCS1D02G435200	translation	biological_process	GO:0006412	Ribosomal_S18_CS
TraesCS1D02G435200	translation	biological_process	GO:0006412	Ribosomal_S18_sf
TraesCS1D02G435300	translation	biological_process	GO:0006412	Ribosomal_L33
TraesCS1D02G435300	translation	biological_process	GO:0006412	Ribosomal_zn-bd
TraesCS1D02G435300	translation	biological_process	GO:0006412	L33_sf
TraesCS1D02G435400	photosynthesis	biological_process	GO:0015979	PSI_PsaJ
TraesCS1D02G435400	photosynthesis	biological_process	GO:0015979	PSI_PsaJ_sf
TraesCS1D02G435500	photosynthesis	biological_process	GO:0015979	Cyt_6/f_cplx_su5
TraesCS1D02G435500	photosynthesis	biological_process	GO:0015979	Cyt_6/f_cplx_su5_sf
TraesCS1D02G435500	cytochrome complex assembly	biological_process	GO:0017004	Cyt_6/f_cplx_su5
TraesCS1D02G435500	cytochrome complex assembly	biological_process	GO:0017004	Cyt_6/f_cplx_su5_sf
TraesCS1D02G435500	oxidation-reduction process	biological_process	GO:0055114	Cyt_6/f_cplx_su5
TraesCS1D02G435500	oxidation-reduction process	biological_process	GO:0055114	Cyt_6/f_cplx_su5_sf
TraesCS1D02G435500	electron transport chain	biological_process	GO:0022900	Cyt_6/f_cplx_su5
TraesCS1D02G435500	electron transport chain	biological_process	GO:0022900	Cyt_6/f_cplx_su5_sf
TraesCS2A02G210900	translation	biological_process	GO:0006412	Ribosomal_L23/L25_CS
TraesCS2A02G210900	translation	biological_process	GO:0006412	Nucleotide-bd_a/b_plait_sf
TraesCS2A02G210900	translation	biological_process	GO:0006412	Ribosomal_L23/L15e_core_dom_sf
TraesCS2A02G210900	translation	biological_process	GO:0006412	Ribosomal_L25/23
TraesCS2A02G232500	photosynthesis	biological_process	GO:0015979	PSII_cyt_b559_asu
TraesCS2A02G232500	photosynthesis	biological_process	GO:0015979	PSII_cyt_b559_N
TraesCS2A02G232500	photosynthesis	biological_process	GO:0015979	PSII_cytb559_asu_lum
TraesCS2A02G232500	photosynthesis	biological_process	GO:0015979	PSII_cyt_b559_asu_sf
TraesCS2A02G232500	photosynthetic electron transport chain	biological_process	GO:0009767	PSII_cyt_b559_asu
TraesCS2A02G232500	photosynthetic electron transport chain	biological_process	GO:0009767	PSII_cyt_b559_N
TraesCS2A02G232500	photosynthetic electron transport chain	biological_process	GO:0009767	PSII_cytb559_asu_lum
TraesCS2A02G232500	photosynthetic electron transport chain	biological_process	GO:0009767	PSII_cyt_b559_asu_sf
TraesCS2A02G232500	photosynthesis, light reaction	biological_process	GO:0019684	PSII_cyt_b559_asu
TraesCS2A02G232500	photosynthesis, light reaction	biological_process	GO:0019684	PSII_cyt_b559_N
TraesCS2A02G232500	photosynthesis, light reaction	biological_process	GO:0019684	PSII_cytb559_asu_lum
TraesCS2A02G232500	photosynthesis, light reaction	biological_process	GO:0019684	PSII_cyt_b559_asu_sf
TraesCS2A02G240800	photosynthesis	biological_process	GO:0015979	PSII_cyt_b559_CS
TraesCS2A02G240800	photosynthesis	biological_process	GO:0015979	PSII_cyt_b559_bsu
TraesCS2A02G240800	photosynthesis	biological_process	GO:0015979	PSII_cyt_b559_N
TraesCS2A02G240800	photosynthetic electron transport chain	biological_process	GO:0009767	PSII_cyt_b559_CS
TraesCS2A02G240800	photosynthetic electron transport chain	biological_process	GO:0009767	PSII_cyt_b559_bsu
TraesCS2A02G240800	photosynthetic electron transport chain	biological_process	GO:0009767	PSII_cyt_b559_N
TraesCS2A02G240800	photosynthesis, light reaction	biological_process	GO:0019684	PSII_cyt_b559_CS
TraesCS2A02G240800	photosynthesis, light reaction	biological_process	GO:0019684	PSII_cyt_b559_bsu
TraesCS2A02G240800	photosynthesis, light reaction	biological_process	GO:0019684	PSII_cyt_b559_N
TraesCS2A02G241300	translation	biological_process	GO:0006412	Ribosomal_S3_bac-typ
TraesCS2A02G241300	translation	biological_process	GO:0006412	KH_sf_prok-type
TraesCS2A02G241400	translation	biological_process	GO:0006412	Ribosomal_L22
TraesCS2A02G241400	translation	biological_process	GO:0006412	Ribosomal_L22_bac/chlpt-type
TraesCS2A02G241400	translation	biological_process	GO:0006412	Ribosomal_L22/L17_sf
TraesCS2A02G241500	translation	biological_process	GO:0006412	Ribosomal_S19
TraesCS2A02G241500	translation	biological_process	GO:0006412	Ribosomal_S19_bac-type
TraesCS2A02G241500	translation	biological_process	GO:0006412	Ribosomal_S19_CS
TraesCS2A02G241500	translation	biological_process	GO:0006412	Ribosomal_S19_SF
TraesCS2A02G241700	translation	biological_process	GO:0006412	Ribosomal_S16
TraesCS2A02G241700	translation	biological_process	GO:0006412	Ribosomal_S16_CS
TraesCS2A02G241700	translation	biological_process	GO:0006412	Ribosomal_S16_dom_sf
TraesCS2A02G257100	translation	biological_process	GO:0006412	Ribosomal_S15
TraesCS2A02G257100	translation	biological_process	GO:0006412	Ribosomal_S15_bac-type
TraesCS2A02G257100	translation	biological_process	GO:0006412	S15_NS1_RNA-bd
TraesCS2A02G470300	transcription, DNA-templated	biological_process	GO:0006351
TraesCS2B02G064300	RNA processing	biological_process	GO:0006396	PolA_pol_head_dom
TraesCS2B02G082300	protein phosphorylation	biological_process	GO:0006468	Prot_kinase_dom
TraesCS2B02G082300	protein phosphorylation	biological_process	GO:0006468	Ser/Thr_kinase_AS
TraesCS2B02G082300	protein phosphorylation	biological_process	GO:0006468	Kinase-like_dom_sf
TraesCS2B02G330500	photosynthesis	biological_process	GO:0015979	PSII_PsbK
TraesCS2B02G330500	photosynthesis	biological_process	GO:0015979	PSII_PsbK_sf
TraesCS2B02G330700	photosynthesis	biological_process	GO:0015979	Photo_RC_L/M
TraesCS2B02G330700	photosynthesis	biological_process	GO:0015979	PSII_PsbD/D2
TraesCS2B02G330700	photosynthesis	biological_process	GO:0015979	Photo_II_D1/D2_sf
TraesCS2B02G330700	photosynthesis, light reaction	biological_process	GO:0019684	Photo_RC_L/M
TraesCS2B02G330700	photosynthesis, light reaction	biological_process	GO:0019684	PSII_PsbD/D2
TraesCS2B02G330700	photosynthesis, light reaction	biological_process	GO:0019684	Photo_II_D1/D2_sf
TraesCS2B02G330700	photosynthetic electron transport in photosystem II	biological_process	GO:0009772	Photo_RC_L/M
TraesCS2B02G330700	photosynthetic electron transport in photosystem II	biological_process	GO:0009772	PSII_PsbD/D2
TraesCS2B02G330700	photosynthetic electron transport in photosystem II	biological_process	GO:0009772	Photo_II_D1/D2_sf
TraesCS2B02G330700	oxidation-reduction process	biological_process	GO:0055114	Photo_RC_L/M
TraesCS2B02G330700	oxidation-reduction process	biological_process	GO:0055114	PSII_PsbD/D2
TraesCS2B02G330700	oxidation-reduction process	biological_process	GO:0055114	Photo_II_D1/D2_sf
TraesCS2B02G330700	protein-chromophore linkage	biological_process	GO:0018298	Photo_RC_L/M
TraesCS2B02G330700	protein-chromophore linkage	biological_process	GO:0018298	PSII_PsbD/D2
TraesCS2B02G330700	protein-chromophore linkage	biological_process	GO:0018298	Photo_II_D1/D2_sf
TraesCS2B02G338000	translation	biological_process	GO:0006412	Ribosomal_L22_bac/chlpt-type
TraesCS2B02G338000	translation	biological_process	GO:0006412	Ribosomal_L22/L17_sf
TraesCS2B02G449000	translation	biological_process	GO:0006412	Ribosomal_S8
TraesCS2B02G449000	translation	biological_process	GO:0006412	Ribosomal_S8_sf
TraesCS2B02G487200	ATP synthesis coupled proton transport	biological_process	GO:0015986	ATP_synth_b/b'su_bac/chlpt
TraesCS2B02G487500	photosynthesis	biological_process	GO:0015979	TPR_1
TraesCS2B02G487500	photosynthesis	biological_process	GO:0015979	TPR-like_helical_dom_sf
TraesCS2B02G487500	photosynthesis	biological_process	GO:0015979	TPR-contain_dom
TraesCS2B02G487500	photosynthesis	biological_process	GO:0015979	TPR_repeat
TraesCS2B02G487500	photosynthesis	biological_process	GO:0015979	PSI_Ycf3_assembly
TraesCS2D02G020800	photosynthesis	biological_process	GO:0015979	PSII_PsbK
TraesCS2D02G020800	photosynthesis	biological_process	GO:0015979	PSII_PsbK_sf
TraesCS2D02G079300	oxidation-reduction process	biological_process	GO:0055114	NADH_UbQ/plastoQ_OxRdtase_su6
TraesCS2D02G079300	oxidation-reduction process	biological_process	GO:0055114	Nuo/plastoQ_OxRdtase_6_NuoJ
TraesCS2D02G079400	oxidation-reduction process	biological_process	GO:0055114	NADH_UbQ_OxRdtase_chain4L/K
TraesCS2D02G079400	oxidation-reduction process	biological_process	GO:0055114	NUOK/Mnh_C1-like
TraesCS2D02G079400	ATP synthesis coupled electron transport	biological_process	GO:0042773	NADH_UbQ_OxRdtase_chain4L/K
TraesCS2D02G079400	ATP synthesis coupled electron transport	biological_process	GO:0042773	NUOK/Mnh_C1-like
TraesCS2D02G079400	photosynthesis, light reaction	biological_process	GO:0019684	NADH_UbQ_OxRdtase_chain4L/K
TraesCS2D02G079400	photosynthesis, light reaction	biological_process	GO:0019684	NUOK/Mnh_C1-like
TraesCS2D02G230000	oxidation-reduction process	biological_process	GO:0055114	Cyt_C_Oxase_1
TraesCS2D02G230000	oxidation-reduction process	biological_process	GO:0055114	Cyt_c_oxidase_su1_bac
TraesCS2D02G230000	oxidation-reduction process	biological_process	GO:0055114	Cyt_c_Oxase_su1_BS
TraesCS2D02G230000	oxidation-reduction process	biological_process	GO:0055114	Cyt_c_oxase-like_su1_dom
TraesCS2D02G230000	oxidation-reduction process	biological_process	GO:0055114	Cyt_c_oxase_su1_dom
TraesCS2D02G230000	oxidation-reduction process	biological_process	GO:0055114	Cyt_c_oxase-like_su1_sf
TraesCS2D02G230000	aerobic respiration	biological_process	GO:0009060	Cyt_C_Oxase_1
TraesCS2D02G230000	aerobic respiration	biological_process	GO:0009060	Cyt_c_oxidase_su1_bac
TraesCS2D02G230000	aerobic respiration	biological_process	GO:0009060	Cyt_c_Oxase_su1_BS
TraesCS2D02G230000	aerobic respiration	biological_process	GO:0009060	Cyt_c_oxase-like_su1_dom
TraesCS2D02G230000	aerobic respiration	biological_process	GO:0009060	Cyt_c_oxase_su1_dom
TraesCS2D02G230000	aerobic respiration	biological_process	GO:0009060	Cyt_c_oxase-like_su1_sf
TraesCS2D02G230000	electron transport coupled proton transport	biological_process	GO:0015990	Cyt_C_Oxase_1
TraesCS2D02G230000	electron transport coupled proton transport	biological_process	GO:0015990	Cyt_c_oxidase_su1_bac
TraesCS2D02G230000	electron transport coupled proton transport	biological_process	GO:0015990	Cyt_c_Oxase_su1_BS
TraesCS2D02G230000	electron transport coupled proton transport	biological_process	GO:0015990	Cyt_c_oxase-like_su1_dom
TraesCS2D02G230000	electron transport coupled proton transport	biological_process	GO:0015990	Cyt_c_oxase_su1_dom
TraesCS2D02G230000	electron transport coupled proton transport	biological_process	GO:0015990	Cyt_c_oxase-like_su1_sf
TraesCS2D02G243100	translation	biological_process	GO:0006412	Ribosomal_L16
TraesCS2D02G243100	translation	biological_process	GO:0006412	Ribosomal_L10e/L16
TraesCS2D02G243100	translation	biological_process	GO:0006412	Ribosomal_L16_CS
TraesCS2D02G243100	translation	biological_process	GO:0006412	Ribosomal_L10e/L16_sf
TraesCS2D02G243100	mitochondrial translation	biological_process	GO:0032543	Ribosomal_L16
TraesCS2D02G243100	mitochondrial translation	biological_process	GO:0032543	Ribosomal_L10e/L16
TraesCS2D02G243100	mitochondrial translation	biological_process	GO:0032543	Ribosomal_L16_CS
TraesCS2D02G243100	mitochondrial translation	biological_process	GO:0032543	Ribosomal_L10e/L16_sf
TraesCS2D02G243300	translation	biological_process	GO:0006412	Ribosomal_S8
TraesCS2D02G243300	translation	biological_process	GO:0006412	Ribosomal_S8_sf
TraesCS2D02G243400	translation	biological_process	GO:0006412	Ribosomal_S11
TraesCS2D02G243400	translation	biological_process	GO:0006412	Ribosomal_S11_CS
TraesCS2D02G243400	translation	biological_process	GO:0006412	Ribosomal_S11_sf
TraesCS2D02G243500	oxidation-reduction process	biological_process	GO:0055114	NADH_plast_OxRdtase_su_I
TraesCS2D02G243500	oxidation-reduction process	biological_process	GO:0055114	NADH_quinone_OxRdtase_chainI
TraesCS2D02G243500	oxidation-reduction process	biological_process	GO:0055114	4Fe4S_Fe-S-bd
TraesCS2D02G243500	oxidation-reduction process	biological_process	GO:0055114	4Fe4S_Fe_S_CS
TraesCS2D02G243600	oxidation-reduction process	biological_process	GO:0055114	NADH_UbQ_OxRdtase_su1/FPO
TraesCS2D02G243700	oxidation-reduction process	biological_process	GO:0055114	NADH_Q_OxRdtase_suD
TraesCS2D02G243700	oxidation-reduction process	biological_process	GO:0055114	NADH_UbQ_OxRdtase_49kDa_CS
TraesCS2D02G243700	oxidation-reduction process	biological_process	GO:0055114	NDH1_su_D/H
TraesCS2D02G243700	oxidation-reduction process	biological_process	GO:0055114	NiFe-Hase_large
TraesCS2D02G243700	oxidation-reduction process	biological_process	GO:0055114	NADH_Q_OxRdtase_suD_sf
TraesCS2D02G243700	photosynthesis, light reaction	biological_process	GO:0019684	NADH_Q_OxRdtase_suD
TraesCS2D02G243700	photosynthesis, light reaction	biological_process	GO:0019684	NADH_UbQ_OxRdtase_49kDa_CS
TraesCS2D02G243700	photosynthesis, light reaction	biological_process	GO:0019684	NDH1_su_D/H
TraesCS2D02G243700	photosynthesis, light reaction	biological_process	GO:0019684	NiFe-Hase_large
TraesCS2D02G243700	photosynthesis, light reaction	biological_process	GO:0019684	NADH_Q_OxRdtase_suD_sf
TraesCS2D02G243800	translation	biological_process	GO:0006412	Ribosomal_S15
TraesCS2D02G243800	translation	biological_process	GO:0006412	Ribosomal_S15_bac-type
TraesCS2D02G243800	translation	biological_process	GO:0006412	S15_NS1_RNA-bd
TraesCS2D02G270700	photosynthesis	biological_process	GO:0015979	PSII_cyt_b559_CS
TraesCS2D02G270700	photosynthesis	biological_process	GO:0015979	PSII_cyt_b559_asu
TraesCS2D02G270700	photosynthesis	biological_process	GO:0015979	PSII_cyt_b559_N
TraesCS2D02G270700	photosynthesis	biological_process	GO:0015979	PSII_cytb559_asu_lum
TraesCS2D02G270700	photosynthesis	biological_process	GO:0015979	PSII_cyt_b559_asu_sf
TraesCS2D02G270700	photosynthetic electron transport chain	biological_process	GO:0009767	PSII_cyt_b559_CS
TraesCS2D02G270700	photosynthetic electron transport chain	biological_process	GO:0009767	PSII_cyt_b559_asu
TraesCS2D02G270700	photosynthetic electron transport chain	biological_process	GO:0009767	PSII_cyt_b559_N
TraesCS2D02G270700	photosynthetic electron transport chain	biological_process	GO:0009767	PSII_cytb559_asu_lum
TraesCS2D02G270700	photosynthetic electron transport chain	biological_process	GO:0009767	PSII_cyt_b559_asu_sf
TraesCS2D02G270700	photosynthesis, light reaction	biological_process	GO:0019684	PSII_cyt_b559_CS
TraesCS2D02G270700	photosynthesis, light reaction	biological_process	GO:0019684	PSII_cyt_b559_asu
TraesCS2D02G270700	photosynthesis, light reaction	biological_process	GO:0019684	PSII_cyt_b559_N
TraesCS2D02G270700	photosynthesis, light reaction	biological_process	GO:0019684	PSII_cytb559_asu_lum
TraesCS2D02G270700	photosynthesis, light reaction	biological_process	GO:0019684	PSII_cyt_b559_asu_sf
TraesCS2D02G270700	oxidation-reduction process	biological_process	GO:0055114	PSII_cyt_b559_CS
TraesCS2D02G270700	oxidation-reduction process	biological_process	GO:0055114	PSII_cyt_b559_asu
TraesCS2D02G270700	oxidation-reduction process	biological_process	GO:0055114	PSII_cyt_b559_N
TraesCS2D02G270700	oxidation-reduction process	biological_process	GO:0055114	PSII_cytb559_asu_lum
TraesCS2D02G270700	oxidation-reduction process	biological_process	GO:0055114	PSII_cyt_b559_asu_sf
TraesCS2D02G270800	photosynthesis	biological_process	GO:0015979	Cyt_b6/f_cplx_su6
TraesCS2D02G270800	oxidation-reduction process	biological_process	GO:0055114	Cyt_b6/f_cplx_su6
TraesCS2D02G270800	electron transport chain	biological_process	GO:0022900	Cyt_b6/f_cplx_su6
TraesCS2D02G271000	translation	biological_process	GO:0006412	Ribosomal_L33
TraesCS2D02G271000	translation	biological_process	GO:0006412	Ribosomal_zn-bd
TraesCS2D02G271000	translation	biological_process	GO:0006412	L33_sf
TraesCS2D02G271100	translation	biological_process	GO:0006412	Ribosomal_L20
TraesCS2D02G271100	translation	biological_process	GO:0006412	Ribosomal_protein_L20_C
TraesCS2D02G495000	translation	biological_process	GO:0006412	Ribosomal_S15
TraesCS2D02G495000	translation	biological_process	GO:0006412	Ribosomal_S15_bac-type
TraesCS2D02G495000	translation	biological_process	GO:0006412	S15_NS1_RNA-bd
TraesCS2D02G557000	translation	biological_process	GO:0006412	Ribosomal_S4/S9_N
TraesCS2D02G557000	translation	biological_process	GO:0006412	S4_RNA-bd
TraesCS2D02G557000	translation	biological_process	GO:0006412	Ribosomal_S4_bac-type
TraesCS2D02G557000	translation	biological_process	GO:0006412	Ribosomal_S4_CS
TraesCS2D02G557000	translation	biological_process	GO:0006412	Ribosomal_S4/S9
TraesCS2D02G557000	translation	biological_process	GO:0006412	S4_RNA-bd_sf
TraesCS2D02G557100	oxidation-reduction process	biological_process	GO:0055114	NADH_UbQ_OxRdtase_su1/FPO
TraesCS2D02G557100	oxidation-reduction process	biological_process	GO:0055114	NADH_UbQ_OxRdtase_su1_CS
TraesCS2D02G557200	oxidation-reduction process	biological_process	GO:0055114	NADH_UbQ/plastoQ_OxRdtase_su6
TraesCS2D02G557200	oxidation-reduction process	biological_process	GO:0055114	Nuo/plastoQ_OxRdtase_6_NuoJ
TraesCS2D02G566300	translation	biological_process	GO:0006412	Ribosomal_S3_C
TraesCS2D02G566300	translation	biological_process	GO:0006412	Ribosomal_S3_bac-typ
TraesCS2D02G566300	translation	biological_process	GO:0006412	KH_sf_prok-type
TraesCS2D02G566300	translation	biological_process	GO:0006412	Ribosomal_S3_CS
TraesCS2D02G566300	translation	biological_process	GO:0006412	Ribosomal_S3_C_sf
TraesCS2D02G572900	photosynthetic electron transport chain	biological_process	GO:0009767	PS_antenna-like
TraesCS2D02G572900	photosynthetic electron transport chain	biological_process	GO:0009767	PS_II_antenna-like_sf
TraesCS2D02G572900	photosynthesis, light reaction	biological_process	GO:0019684	PS_antenna-like
TraesCS2D02G572900	photosynthesis, light reaction	biological_process	GO:0019684	PS_II_antenna-like_sf
TraesCS2D02G572900	photosynthesis	biological_process	GO:0015979	PS_antenna-like
TraesCS2D02G572900	photosynthesis	biological_process	GO:0015979	PS_II_antenna-like_sf
TraesCS2D02G572900	protein-chromophore linkage	biological_process	GO:0018298	PS_antenna-like
TraesCS2D02G572900	protein-chromophore linkage	biological_process	GO:0018298	PS_II_antenna-like_sf
TraesCS2D02G572900	photosynthetic electron transport in photosystem II	biological_process	GO:0009772	PS_antenna-like
TraesCS2D02G572900	photosynthetic electron transport in photosystem II	biological_process	GO:0009772	PS_II_antenna-like_sf
TraesCS2D02G573100	photosynthesis	biological_process	GO:0015979	PSII_PsbZ
TraesCS2D02G573100	photosynthesis	biological_process	GO:0015979	PSII_PsbZ_sf
TraesCS2D02G573100	photosystem II stabilization	biological_process	GO:0042549	PSII_PsbZ
TraesCS2D02G573100	photosystem II stabilization	biological_process	GO:0042549	PSII_PsbZ_sf
TraesCS2D02G584400	ATP synthesis coupled proton transport	biological_process	GO:0015986	ATPase_F1/V1/A1_a/bsu_nucl-bd
TraesCS2D02G584400	ATP synthesis coupled proton transport	biological_process	GO:0015986	AAA+_ATPase
TraesCS2D02G584400	ATP synthesis coupled proton transport	biological_process	GO:0015986	ATPase_F1/V1/A1_a/bsu_N
TraesCS2D02G584400	ATP synthesis coupled proton transport	biological_process	GO:0015986	ATP_synth_F1_bsu
TraesCS2D02G584400	ATP synthesis coupled proton transport	biological_process	GO:0015986	ATPase_a/bsu_AS
TraesCS2D02G584400	ATP synthesis coupled proton transport	biological_process	GO:0015986	ATPase_F1/V1_b/a_C
TraesCS2D02G584400	ATP synthesis coupled proton transport	biological_process	GO:0015986	P-loop_NTPase
TraesCS2D02G584400	ATP synthesis coupled proton transport	biological_process	GO:0015986	ATPase_F1/V1/A1_a/bsu_N_sf
TraesCS2D02G584400	ATP metabolic process	biological_process	GO:0046034	ATPase_F1/V1/A1_a/bsu_nucl-bd
TraesCS2D02G584400	ATP metabolic process	biological_process	GO:0046034	AAA+_ATPase
TraesCS2D02G584400	ATP metabolic process	biological_process	GO:0046034	ATPase_F1/V1/A1_a/bsu_N
TraesCS2D02G584400	ATP metabolic process	biological_process	GO:0046034	ATP_synth_F1_bsu
TraesCS2D02G584400	ATP metabolic process	biological_process	GO:0046034	ATPase_a/bsu_AS
TraesCS2D02G584400	ATP metabolic process	biological_process	GO:0046034	ATPase_F1/V1_b/a_C
TraesCS2D02G584400	ATP metabolic process	biological_process	GO:0046034	P-loop_NTPase
TraesCS2D02G584400	ATP metabolic process	biological_process	GO:0046034	ATPase_F1/V1/A1_a/bsu_N_sf
TraesCS2D02G584400	proton transmembrane transport	biological_process	GO:1902600	ATPase_F1/V1/A1_a/bsu_nucl-bd
TraesCS2D02G584400	proton transmembrane transport	biological_process	GO:1902600	AAA+_ATPase
TraesCS2D02G584400	proton transmembrane transport	biological_process	GO:1902600	ATPase_F1/V1/A1_a/bsu_N
TraesCS2D02G584400	proton transmembrane transport	biological_process	GO:1902600	ATP_synth_F1_bsu
TraesCS2D02G584400	proton transmembrane transport	biological_process	GO:1902600	ATPase_a/bsu_AS
TraesCS2D02G584400	proton transmembrane transport	biological_process	GO:1902600	ATPase_F1/V1_b/a_C
TraesCS2D02G584400	proton transmembrane transport	biological_process	GO:1902600	P-loop_NTPase
TraesCS2D02G584400	proton transmembrane transport	biological_process	GO:1902600	ATPase_F1/V1/A1_a/bsu_N_sf
TraesCS2D02G584400	ATP synthesis coupled proton transport	biological_process	GO:0015986	ATP_synth_F1_dsu/esu
TraesCS2D02G584400	ATP synthesis coupled proton transport	biological_process	GO:0015986	ATP_synth_F1_dsu/esu_N
TraesCS2D02G584400	ATP synthesis coupled proton transport	biological_process	GO:0015986	ATPsynth_dsu/esu_N
TraesCS2D02G595600	oxidation-reduction process	biological_process	GO:0055114	NADH_UbQ_OxRdtase-like_20kDa
TraesCS2D02G595600	oxidation-reduction process	biological_process	GO:0055114	NADH_UQ_OxRdtase_20Kd_su
TraesCS3A02G173700	oxidation-reduction process	biological_process	GO:0055114	NADH_UbQ/plastoQ_OxRdtase_su3
TraesCS3A02G173700	oxidation-reduction process	biological_process	GO:0055114	NDAH_ubi_oxred_su3_sf
TraesCS3A02G194700	translation	biological_process	GO:0006412	Ribosomal_S4/S9_N
TraesCS3A02G194700	translation	biological_process	GO:0006412	S4_RNA-bd
TraesCS3A02G194700	translation	biological_process	GO:0006412	Ribosomal_S4_bac-type
TraesCS3A02G194700	translation	biological_process	GO:0006412	Ribosomal_S4_CS
TraesCS3A02G194700	translation	biological_process	GO:0006412	Ribosomal_S4/S9
TraesCS3A02G194700	translation	biological_process	GO:0006412	S4_RNA-bd_sf
TraesCS3A02G430000	oxidation-reduction process	biological_process	GO:0055114	NADH_UbQ_OxRdtase_chain4L/K
TraesCS3A02G430000	oxidation-reduction process	biological_process	GO:0055114	NUOK/Mnh_C1-like
TraesCS3A02G430000	ATP synthesis coupled electron transport	biological_process	GO:0042773	NADH_UbQ_OxRdtase_chain4L/K
TraesCS3A02G430000	ATP synthesis coupled electron transport	biological_process	GO:0042773	NUOK/Mnh_C1-like
TraesCS3A02G430200	oxidation-reduction process	biological_process	GO:0055114	NADH_plast_OxRdtase_su_I
TraesCS3A02G430200	oxidation-reduction process	biological_process	GO:0055114	NADH_quinone_OxRdtase_chainI
TraesCS3A02G430200	oxidation-reduction process	biological_process	GO:0055114	4Fe4S_Fe-S-bd
TraesCS3A02G430200	oxidation-reduction process	biological_process	GO:0055114	4Fe4S_Fe_S_CS
TraesCS3A02G430200	photosynthesis, light reaction	biological_process	GO:0019684	NADH_plast_OxRdtase_su_I
TraesCS3A02G430200	photosynthesis, light reaction	biological_process	GO:0019684	NADH_quinone_OxRdtase_chainI
TraesCS3A02G430200	photosynthesis, light reaction	biological_process	GO:0019684	4Fe4S_Fe-S-bd
TraesCS3A02G430200	photosynthesis, light reaction	biological_process	GO:0019684	4Fe4S_Fe_S_CS
TraesCS3A02G430300	oxidation-reduction process	biological_process	GO:0055114	NADH_UbQ_OxRdtase_su1/FPO
TraesCS3A02G431800	translation	biological_process	GO:0006412	Ribosomal_S8
TraesCS3A02G431800	translation	biological_process	GO:0006412	Ribosomal_S8_sf
TraesCS3A02G431900	translational initiation	biological_process	GO:0006413	TIF_IF1
TraesCS3A02G431900	translational initiation	biological_process	GO:0006413	RNA-binding_domain_S1_IF1
TraesCS3A02G431900	translational initiation	biological_process	GO:0006413	NA-bd_OB-fold
TraesCS3A02G454200	translational initiation	biological_process	GO:0006413	TIF_IF1
TraesCS3A02G454200	translational initiation	biological_process	GO:0006413	RNA-binding_domain_S1_IF1
TraesCS3A02G454200	translational initiation	biological_process	GO:0006413	NA-bd_OB-fold
TraesCS3A02G454200	translational initiation	biological_process	GO:0006413	S1_dom
TraesCS3A02G454200	translation	biological_process	GO:0006412	TIF_IF1
TraesCS3A02G454200	translation	biological_process	GO:0006412	RNA-binding_domain_S1_IF1
TraesCS3A02G454200	translation	biological_process	GO:0006412	NA-bd_OB-fold
TraesCS3A02G454200	translation	biological_process	GO:0006412	S1_dom
TraesCS3A02G458600	translation	biological_process	GO:0006412	Ribosomal_S15
TraesCS3A02G458600	translation	biological_process	GO:0006412	Ribosomal_S15_bac-type
TraesCS3A02G458600	translation	biological_process	GO:0006412	S15_NS1_RNA-bd
TraesCS3B02G121700	translation	biological_process	GO:0006412	Ribosomal_S5/S7
TraesCS3B02G121700	translation	biological_process	GO:0006412	Ribosomal_S7_bac/org-type
TraesCS3B02G121700	translation	biological_process	GO:0006412	Ribosomal_S7_dom
TraesCS3B02G121700	translation	biological_process	GO:0006412	RPS7_plant
TraesCS3B02G121700	translation	biological_process	GO:0006412	Ribosomal_S7_dom_sf
TraesCS3B02G126000	oxidation-reduction process	biological_process	GO:0055114	ND/Mrp_mem
TraesCS3B02G126000	oxidation-reduction process	biological_process	GO:0055114	NADH-Q_OxRdtase_suN/2
TraesCS3B02G126000	ATP synthesis coupled electron transport	biological_process	GO:0042773	ND/Mrp_mem
TraesCS3B02G126000	ATP synthesis coupled electron transport	biological_process	GO:0042773	NADH-Q_OxRdtase_suN/2
TraesCS3B02G126000	photosynthesis, light reaction	biological_process	GO:0019684	ND/Mrp_mem
TraesCS3B02G126000	photosynthesis, light reaction	biological_process	GO:0019684	NADH-Q_OxRdtase_suN/2
TraesCS3B02G126100	photosynthesis	biological_process	GO:0015979	PSII_PsbK
TraesCS3B02G126100	photosynthesis	biological_process	GO:0015979	PSII_PsbK_sf
TraesCS3B02G185500	photosynthesis	biological_process	GO:0015979	PSI_PsaA/B
TraesCS3B02G185500	photosynthesis	biological_process	GO:0015979	PSI_PsaA
TraesCS3B02G185500	photosynthesis	biological_process	GO:0015979	PSI_PsaA/B_CS
TraesCS3B02G185500	photosynthesis	biological_process	GO:0015979	PSI_PsaA/B_sf
TraesCS3B02G186000	ATP synthesis coupled proton transport	biological_process	GO:0015986	ATPase_F1/V1/A1_a/bsu_nucl-bd
TraesCS3B02G186000	ATP synthesis coupled proton transport	biological_process	GO:0015986	AAA+_ATPase
TraesCS3B02G186000	ATP synthesis coupled proton transport	biological_process	GO:0015986	ATPase_F1/V1/A1_a/bsu_N
TraesCS3B02G186000	ATP synthesis coupled proton transport	biological_process	GO:0015986	ATP_synth_F1_bsu
TraesCS3B02G186000	ATP synthesis coupled proton transport	biological_process	GO:0015986	ATPase_a/bsu_AS
TraesCS3B02G186000	ATP synthesis coupled proton transport	biological_process	GO:0015986	ATPase_F1/V1_b/a_C
TraesCS3B02G186000	ATP synthesis coupled proton transport	biological_process	GO:0015986	P-loop_NTPase
TraesCS3B02G186000	ATP synthesis coupled proton transport	biological_process	GO:0015986	ATPase_F1/V1/A1_a/bsu_N_sf
TraesCS3B02G186000	ATP metabolic process	biological_process	GO:0046034	ATPase_F1/V1/A1_a/bsu_nucl-bd
TraesCS3B02G186000	ATP metabolic process	biological_process	GO:0046034	AAA+_ATPase
TraesCS3B02G186000	ATP metabolic process	biological_process	GO:0046034	ATPase_F1/V1/A1_a/bsu_N
TraesCS3B02G186000	ATP metabolic process	biological_process	GO:0046034	ATP_synth_F1_bsu
TraesCS3B02G186000	ATP metabolic process	biological_process	GO:0046034	ATPase_a/bsu_AS
TraesCS3B02G186000	ATP metabolic process	biological_process	GO:0046034	ATPase_F1/V1_b/a_C
TraesCS3B02G186000	ATP metabolic process	biological_process	GO:0046034	P-loop_NTPase
TraesCS3B02G186000	ATP metabolic process	biological_process	GO:0046034	ATPase_F1/V1/A1_a/bsu_N_sf
TraesCS3B02G186000	proton transmembrane transport	biological_process	GO:1902600	ATPase_F1/V1/A1_a/bsu_nucl-bd
TraesCS3B02G186000	proton transmembrane transport	biological_process	GO:1902600	AAA+_ATPase
TraesCS3B02G186000	proton transmembrane transport	biological_process	GO:1902600	ATPase_F1/V1/A1_a/bsu_N
TraesCS3B02G186000	proton transmembrane transport	biological_process	GO:1902600	ATP_synth_F1_bsu
TraesCS3B02G186000	proton transmembrane transport	biological_process	GO:1902600	ATPase_a/bsu_AS
TraesCS3B02G186000	proton transmembrane transport	biological_process	GO:1902600	ATPase_F1/V1_b/a_C
TraesCS3B02G186000	proton transmembrane transport	biological_process	GO:1902600	P-loop_NTPase
TraesCS3B02G186000	proton transmembrane transport	biological_process	GO:1902600	ATPase_F1/V1/A1_a/bsu_N_sf
TraesCS3B02G186100	carbon fixation	biological_process	GO:0015977	RuBisCO_lsu_C
TraesCS3B02G186100	carbon fixation	biological_process	GO:0015977	RuBisCO_lsu_fd_N
TraesCS3B02G186100	carbon fixation	biological_process	GO:0015977	RuBisCo_large_chain_AS
TraesCS3B02G186100	carbon fixation	biological_process	GO:0015977	RuBisCO_lsuI
TraesCS3B02G186100	carbon fixation	biological_process	GO:0015977	RuBisCO
TraesCS3B02G186100	carbon fixation	biological_process	GO:0015977	RuBisCO_lsu_C_sf
TraesCS3B02G186100	carbon fixation	biological_process	GO:0015977	RuBisCO_lsu_N_sf
TraesCS3B02G186100	photorespiration	biological_process	GO:0009853	RuBisCO_lsu_C
TraesCS3B02G186100	photorespiration	biological_process	GO:0009853	RuBisCO_lsu_fd_N
TraesCS3B02G186100	photorespiration	biological_process	GO:0009853	RuBisCo_large_chain_AS
TraesCS3B02G186100	photorespiration	biological_process	GO:0009853	RuBisCO_lsuI
TraesCS3B02G186100	photorespiration	biological_process	GO:0009853	RuBisCO
TraesCS3B02G186100	photorespiration	biological_process	GO:0009853	RuBisCO_lsu_C_sf
TraesCS3B02G186100	photorespiration	biological_process	GO:0009853	RuBisCO_lsu_N_sf
TraesCS3B02G186100	oxidation-reduction process	biological_process	GO:0055114	RuBisCO_lsu_C
TraesCS3B02G186100	oxidation-reduction process	biological_process	GO:0055114	RuBisCO_lsu_fd_N
TraesCS3B02G186100	oxidation-reduction process	biological_process	GO:0055114	RuBisCo_large_chain_AS
TraesCS3B02G186100	oxidation-reduction process	biological_process	GO:0055114	RuBisCO_lsuI
TraesCS3B02G186100	oxidation-reduction process	biological_process	GO:0055114	RuBisCO
TraesCS3B02G186100	oxidation-reduction process	biological_process	GO:0055114	RuBisCO_lsu_C_sf
TraesCS3B02G186100	oxidation-reduction process	biological_process	GO:0055114	RuBisCO_lsu_N_sf
TraesCS3B02G186100	photosynthesis	biological_process	GO:0015979	RuBisCO_lsu_C
TraesCS3B02G186100	photosynthesis	biological_process	GO:0015979	RuBisCO_lsu_fd_N
TraesCS3B02G186100	photosynthesis	biological_process	GO:0015979	RuBisCo_large_chain_AS
TraesCS3B02G186100	photosynthesis	biological_process	GO:0015979	RuBisCO_lsuI
TraesCS3B02G186100	photosynthesis	biological_process	GO:0015979	RuBisCO
TraesCS3B02G186100	photosynthesis	biological_process	GO:0015979	RuBisCO_lsu_C_sf
TraesCS3B02G186100	photosynthesis	biological_process	GO:0015979	RuBisCO_lsu_N_sf
TraesCS3B02G186100	reductive pentose-phosphate cycle	biological_process	GO:0019253	RuBisCO_lsu_C
TraesCS3B02G186100	reductive pentose-phosphate cycle	biological_process	GO:0019253	RuBisCO_lsu_fd_N
TraesCS3B02G186100	reductive pentose-phosphate cycle	biological_process	GO:0019253	RuBisCo_large_chain_AS
TraesCS3B02G186100	reductive pentose-phosphate cycle	biological_process	GO:0019253	RuBisCO_lsuI
TraesCS3B02G186100	reductive pentose-phosphate cycle	biological_process	GO:0019253	RuBisCO
TraesCS3B02G186100	reductive pentose-phosphate cycle	biological_process	GO:0019253	RuBisCO_lsu_C_sf
TraesCS3B02G186100	reductive pentose-phosphate cycle	biological_process	GO:0019253	RuBisCO_lsu_N_sf
TraesCS3B02G186200	photosynthesis	biological_process	GO:0015979	PSI_PsaI
TraesCS3B02G186200	photosynthesis	biological_process	GO:0015979	PSI_PsaI_sf
TraesCS3B02G186300	photosynthesis	biological_process	GO:0015979	PSI_Ycf4_assembly
TraesCS3B02G186700	photosynthesis	biological_process	GO:0015979	PSII_cyt_b559_CS
TraesCS3B02G186700	photosynthesis	biological_process	GO:0015979	PSII_cyt_b559_asu
TraesCS3B02G186700	photosynthesis	biological_process	GO:0015979	PSII_cyt_b559_N
TraesCS3B02G186700	photosynthesis	biological_process	GO:0015979	PSII_cytb559_asu_lum
TraesCS3B02G186700	photosynthesis	biological_process	GO:0015979	PSII_cyt_b559_asu_sf
TraesCS3B02G186700	photosynthetic electron transport chain	biological_process	GO:0009767	PSII_cyt_b559_CS
TraesCS3B02G186700	photosynthetic electron transport chain	biological_process	GO:0009767	PSII_cyt_b559_asu
TraesCS3B02G186700	photosynthetic electron transport chain	biological_process	GO:0009767	PSII_cyt_b559_N
TraesCS3B02G186700	photosynthetic electron transport chain	biological_process	GO:0009767	PSII_cytb559_asu_lum
TraesCS3B02G186700	photosynthetic electron transport chain	biological_process	GO:0009767	PSII_cyt_b559_asu_sf
TraesCS3B02G186700	photosynthesis, light reaction	biological_process	GO:0019684	PSII_cyt_b559_CS
TraesCS3B02G186700	photosynthesis, light reaction	biological_process	GO:0019684	PSII_cyt_b559_asu
TraesCS3B02G186700	photosynthesis, light reaction	biological_process	GO:0019684	PSII_cyt_b559_N
TraesCS3B02G186700	photosynthesis, light reaction	biological_process	GO:0019684	PSII_cytb559_asu_lum
TraesCS3B02G186700	photosynthesis, light reaction	biological_process	GO:0019684	PSII_cyt_b559_asu_sf
TraesCS3B02G186700	oxidation-reduction process	biological_process	GO:0055114	PSII_cyt_b559_CS
TraesCS3B02G186700	oxidation-reduction process	biological_process	GO:0055114	PSII_cyt_b559_asu
TraesCS3B02G186700	oxidation-reduction process	biological_process	GO:0055114	PSII_cyt_b559_N
TraesCS3B02G186700	oxidation-reduction process	biological_process	GO:0055114	PSII_cytb559_asu_lum
TraesCS3B02G186700	oxidation-reduction process	biological_process	GO:0055114	PSII_cyt_b559_asu_sf
TraesCS3B02G187200	translation	biological_process	GO:0006412	Ribosomal_L20
TraesCS3B02G187200	translation	biological_process	GO:0006412	Ribosomal_protein_L20_C
TraesCS3B02G187300	proteolysis	biological_process	GO:0006508	ClpP
TraesCS3B02G187300	proteolysis	biological_process	GO:0006508	ClpP_Ser_AS
TraesCS3B02G187300	proteolysis	biological_process	GO:0006508	ClpP/TepA
TraesCS3B02G187300	proteolysis	biological_process	GO:0006508	ClpP/crotonase-like_dom_sf
TraesCS3B02G187300	proteolysis	biological_process	GO:0006508	ClpP_His_AS
TraesCS3B02G187300	protein quality control for misfolded or incompletely synthesized proteins	biological_process	GO:0006515	ClpP
TraesCS3B02G187300	protein quality control for misfolded or incompletely synthesized proteins	biological_process	GO:0006515	ClpP_Ser_AS
TraesCS3B02G187300	protein quality control for misfolded or incompletely synthesized proteins	biological_process	GO:0006515	ClpP/TepA
TraesCS3B02G187300	protein quality control for misfolded or incompletely synthesized proteins	biological_process	GO:0006515	ClpP/crotonase-like_dom_sf
TraesCS3B02G187300	protein quality control for misfolded or incompletely synthesized proteins	biological_process	GO:0006515	ClpP_His_AS
TraesCS3B02G187400	photosynthesis	biological_process	GO:0015979	PSII_PsbN
TraesCS3B02G187500	photosynthesis	biological_process	GO:0015979	PSII_PsbH
TraesCS3B02G187500	photosynthesis	biological_process	GO:0015979	PSII_PsbH_sf
TraesCS3B02G187500	protein stabilization	biological_process	GO:0050821	PSII_PsbH
TraesCS3B02G187500	protein stabilization	biological_process	GO:0050821	PSII_PsbH_sf
TraesCS3B02G187600	translation	biological_process	GO:0006412	Ribosomal_S11
TraesCS3B02G187600	translation	biological_process	GO:0006412	Ribosomal_S11_CS
TraesCS3B02G187600	translation	biological_process	GO:0006412	Ribosomal_S11_sf
TraesCS3B02G187800	translation	biological_process	GO:0006412	Ribosomal_L22
TraesCS3B02G187800	translation	biological_process	GO:0006412	Ribosomal_L22_bac/chlpt-type
TraesCS3B02G187800	translation	biological_process	GO:0006412	Ribosomal_L22/L17_sf
TraesCS3B02G187900	translation	biological_process	GO:0006412	Ribosomal_S5/S7
TraesCS3B02G187900	translation	biological_process	GO:0006412	Ribosomal_S7_bac/org-type
TraesCS3B02G187900	translation	biological_process	GO:0006412	Ribosomal_S7_dom
TraesCS3B02G187900	translation	biological_process	GO:0006412	Ribosomal_S7_dom_sf
TraesCS3B02G188500	translation	biological_process	GO:0006412	Ribosomal_S15
TraesCS3B02G188500	translation	biological_process	GO:0006412	Ribosomal_S15_bac-type
TraesCS3B02G188500	translation	biological_process	GO:0006412	S15_NS1_RNA-bd
TraesCS3B02G188600	translation	biological_process	GO:0006412	Ribosomal_L32p
TraesCS3B02G188600	translation	biological_process	GO:0006412	Ribosomal_zn-bd
TraesCS3B02G188700	cytochrome complex assembly	biological_process	GO:0017004	Cyt_c_assembly
TraesCS3B02G188800	oxidation-reduction process	biological_process	GO:0055114	ND/Mrp_mem
TraesCS3B02G188800	oxidation-reduction process	biological_process	GO:0055114	NADH_UbQ_OxRdtase
TraesCS3B02G188800	oxidation-reduction process	biological_process	GO:0055114	NADH_Q_OxRdtase_chainM/4
TraesCS3B02G188800	ATP synthesis coupled electron transport	biological_process	GO:0042773	ND/Mrp_mem
TraesCS3B02G188800	ATP synthesis coupled electron transport	biological_process	GO:0042773	NADH_UbQ_OxRdtase
TraesCS3B02G188800	ATP synthesis coupled electron transport	biological_process	GO:0042773	NADH_Q_OxRdtase_chainM/4
TraesCS3B02G188800	aerobic respiration	biological_process	GO:0009060	ND/Mrp_mem
TraesCS3B02G188800	aerobic respiration	biological_process	GO:0009060	NADH_UbQ_OxRdtase
TraesCS3B02G188800	aerobic respiration	biological_process	GO:0009060	NADH_Q_OxRdtase_chainM/4
TraesCS3B02G188800	electron transport coupled proton transport	biological_process	GO:0015990	ND/Mrp_mem
TraesCS3B02G188800	electron transport coupled proton transport	biological_process	GO:0015990	NADH_UbQ_OxRdtase
TraesCS3B02G188800	electron transport coupled proton transport	biological_process	GO:0015990	NADH_Q_OxRdtase_chainM/4
TraesCS3B02G188900	photosynthesis	biological_process	GO:0015979	PSI_PsaC
TraesCS3B02G188900	photosynthesis	biological_process	GO:0015979	4Fe4S_Fe-S-bd
TraesCS3B02G188900	photosynthesis	biological_process	GO:0015979	4Fe4S_Fe_S_CS
TraesCS3B02G188900	photosynthetic electron transport in photosystem I	biological_process	GO:0009773	PSI_PsaC
TraesCS3B02G188900	photosynthetic electron transport in photosystem I	biological_process	GO:0009773	4Fe4S_Fe-S-bd
TraesCS3B02G188900	photosynthetic electron transport in photosystem I	biological_process	GO:0009773	4Fe4S_Fe_S_CS
TraesCS3B02G189000	oxidation-reduction process	biological_process	GO:0055114	NADH_UbQ/plastoQ_OxRdtase_su6
TraesCS3B02G189000	oxidation-reduction process	biological_process	GO:0055114	Nuo/plastoQ_OxRdtase_6_NuoJ
TraesCS3B02G189100	oxidation-reduction process	biological_process	GO:0055114	NADH_plast_OxRdtase_su_I
TraesCS3B02G189100	oxidation-reduction process	biological_process	GO:0055114	NADH_quinone_OxRdtase_chainI
TraesCS3B02G189100	oxidation-reduction process	biological_process	GO:0055114	4Fe4S_Fe-S-bd
TraesCS3B02G189100	oxidation-reduction process	biological_process	GO:0055114	4Fe4S_Fe_S_CS
TraesCS3B02G189200	oxidation-reduction process	biological_process	GO:0055114	NADH_UbQ_OxRdtase_su1/FPO
TraesCS3B02G189300	translation	biological_process	GO:0006412	Ribosomal_S15
TraesCS3B02G189300	translation	biological_process	GO:0006412	Ribosomal_S15_bac-type
TraesCS3B02G189300	translation	biological_process	GO:0006412	S15_NS1_RNA-bd
TraesCS3B02G287400	ion transport	biological_process	GO:0006811	CemA
TraesCS3B02G287400	proton transmembrane transport	biological_process	GO:1902600	CemA
TraesCS3B02G469800	translation	biological_process	GO:0006412	Ribosomal_L2
TraesCS3B02G469800	translation	biological_process	GO:0006412	Ribosomal_L2_bac/org-type
TraesCS3B02G469800	translation	biological_process	GO:0006412	Translation_prot_SH3-like_sf
TraesCS3B02G469800	translation	biological_process	GO:0006412	Rib_L2_dom2
TraesCS3B02G469800	translation	biological_process	GO:0006412	Ribosomal_L2_dom3
TraesCS3B02G469800	translation	biological_process	GO:0006412	Ribosomal_L2_C
TraesCS3B02G469800	translation	biological_process	GO:0006412	Ribosomal_L2_CS
TraesCS3B02G563300	photosynthesis	biological_process	GO:0015979	PSII_PsbM
TraesCS3B02G563300	photosynthesis	biological_process	GO:0015979	PSII_PsbM_sf
TraesCS3B02G563300	photosynthesis, light reaction	biological_process	GO:0019684	PSII_PsbM
TraesCS3B02G563300	photosynthesis, light reaction	biological_process	GO:0019684	PSII_PsbM_sf
TraesCS3B02G582300	oxidation-reduction process	biological_process	GO:0055114	NADH_UbQ_OxRdtase_su1/FPO
TraesCS3D02G029800	photosynthesis	biological_process	GO:0015979	PSII_PsbH
TraesCS3D02G029800	photosynthesis	biological_process	GO:0015979	PSII_PsbH_sf
TraesCS3D02G029800	protein stabilization	biological_process	GO:0050821	PSII_PsbH
TraesCS3D02G029800	protein stabilization	biological_process	GO:0050821	PSII_PsbH_sf
TraesCS3D02G052600	photosynthesis	biological_process	GO:0015979	PSII_PsbJ
TraesCS3D02G052600	photosynthesis	biological_process	GO:0015979	PSII_PsbJ_sf
TraesCS3D02G053000	translation	biological_process	GO:0006412	Ribosomal_L33
TraesCS3D02G053000	translation	biological_process	GO:0006412	Ribosomal_zn-bd
TraesCS3D02G053000	translation	biological_process	GO:0006412	Ribosomal_L33_CS
TraesCS3D02G053000	translation	biological_process	GO:0006412	L33_sf
TraesCS3D02G053100	translation	biological_process	GO:0006412	Ribosomal_S18
TraesCS3D02G053100	translation	biological_process	GO:0006412	Ribosomal_S18_CS
TraesCS3D02G053100	translation	biological_process	GO:0006412	Ribosomal_S18_sf
TraesCS3D02G053200	translation	biological_process	GO:0006412	Ribosomal_L20
TraesCS3D02G053200	translation	biological_process	GO:0006412	Ribosomal_protein_L20_C
TraesCS3D02G053200	ribosomal large subunit assembly	biological_process	GO:0000027	Ribosomal_L20
TraesCS3D02G053200	ribosomal large subunit assembly	biological_process	GO:0000027	Ribosomal_protein_L20_C
TraesCS3D02G053300	proteolysis	biological_process	GO:0006508	ClpP
TraesCS3D02G053300	proteolysis	biological_process	GO:0006508	ClpP_Ser_AS
TraesCS3D02G053300	proteolysis	biological_process	GO:0006508	ClpP/TepA
TraesCS3D02G053300	proteolysis	biological_process	GO:0006508	ClpP/crotonase-like_dom_sf
TraesCS3D02G053300	proteolysis	biological_process	GO:0006508	ClpP_His_AS
TraesCS3D02G057700	translation	biological_process	GO:0006412	Ribosomal_S4/S9_N
TraesCS3D02G057700	translation	biological_process	GO:0006412	S4_RNA-bd
TraesCS3D02G057700	translation	biological_process	GO:0006412	Ribosomal_S4_bac-type
TraesCS3D02G057700	translation	biological_process	GO:0006412	Ribosomal_S4_CS
TraesCS3D02G057700	translation	biological_process	GO:0006412	Ribosomal_S4/S9
TraesCS3D02G057700	translation	biological_process	GO:0006412	S4_RNA-bd_sf
TraesCS3D02G057700	positive regulation of translational fidelity	biological_process	GO:0045903	Ribosomal_S4/S9_N
TraesCS3D02G057700	positive regulation of translational fidelity	biological_process	GO:0045903	S4_RNA-bd
TraesCS3D02G057700	positive regulation of translational fidelity	biological_process	GO:0045903	Ribosomal_S4_bac-type
TraesCS3D02G057700	positive regulation of translational fidelity	biological_process	GO:0045903	Ribosomal_S4_CS
TraesCS3D02G057700	positive regulation of translational fidelity	biological_process	GO:0045903	Ribosomal_S4/S9
TraesCS3D02G057700	positive regulation of translational fidelity	biological_process	GO:0045903	S4_RNA-bd_sf
TraesCS3D02G057800	translation	biological_process	GO:0006412	Ribosomal_L14P
TraesCS3D02G057800	translation	biological_process	GO:0006412	Ribosomal_L14P_bac-type
TraesCS3D02G057800	translation	biological_process	GO:0006412	Ribosomal_L14_sf
TraesCS3D02G057900	translation	biological_process	GO:0006412	Ribosomal_L16
TraesCS3D02G057900	translation	biological_process	GO:0006412	Ribosomal_L10e/L16
TraesCS3D02G057900	translation	biological_process	GO:0006412	Ribosomal_L16_CS
TraesCS3D02G057900	translation	biological_process	GO:0006412	Ribosomal_L10e/L16_sf
TraesCS3D02G058000	translation	biological_process	GO:0006412	Ribosomal_S3_C
TraesCS3D02G058000	translation	biological_process	GO:0006412	Ribosomal_S3_bac-typ
TraesCS3D02G058000	translation	biological_process	GO:0006412	KH_sf_prok-type
TraesCS3D02G058000	translation	biological_process	GO:0006412	Ribosomal_S3_C_sf
TraesCS3D02G177200	cytochrome complex assembly	biological_process	GO:0017004	Cyt_c_assembly
TraesCS3D02G177200	heme transport	biological_process	GO:0015886	Cyt_c_assembly
TraesCS3D02G177300	cytochrome complex assembly	biological_process	GO:0017004	Cyt_c_assembly
TraesCS3D02G177400	translation	biological_process	GO:0006412	Ribosomal_L32p
TraesCS3D02G177400	translation	biological_process	GO:0006412	Ribosomal_zn-bd
TraesCS3D02G177500	translation	biological_process	GO:0006412	Ribosomal_S15
TraesCS3D02G177500	translation	biological_process	GO:0006412	Ribosomal_S15_bac-type
TraesCS3D02G177500	translation	biological_process	GO:0006412	S15_NS1_RNA-bd
TraesCS3D02G469800	translation	biological_process	GO:0006412	Ribosomal_S19
TraesCS3D02G469800	translation	biological_process	GO:0006412	Ribosomal_S19_bac-type
TraesCS3D02G469800	translation	biological_process	GO:0006412	Ribosomal_S19_SF
TraesCS3D02G469800	photosynthesis	biological_process	GO:0015979	PSII_PsbI
TraesCS3D02G469800	photosynthesis	biological_process	GO:0015979	PSII_PsbI_sf
TraesCS3D02G498400	translation	biological_process	GO:0006412	Ribosomal_L32p
TraesCS3D02G498500	translation	biological_process	GO:0006412	Ribosomal_S15
TraesCS3D02G498500	translation	biological_process	GO:0006412	Ribosomal_S15_bac-type
TraesCS3D02G498500	translation	biological_process	GO:0006412	S15_NS1_RNA-bd
TraesCS4A02G116500	oxidation-reduction process	biological_process	GO:0055114	NADH_UbQ_OxRdtase_30kDa_su
TraesCS4A02G116500	oxidation-reduction process	biological_process	GO:0055114	NADH_UbQ_OxRdtase_CS
TraesCS4A02G116500	oxidation-reduction process	biological_process	GO:0055114	NADH_quin_OxRdtase_su_C/D-like
TraesCS4A02G154500	translation	biological_process	GO:0006412	Ribosomal_S19
TraesCS4A02G154500	translation	biological_process	GO:0006412	Ribosomal_S19_bac-type
TraesCS4A02G154500	translation	biological_process	GO:0006412	Ribosomal_S19_SF
TraesCS4A02G457300	translation	biological_process	GO:0006412	Ribosomal_S8
TraesCS4A02G457300	translation	biological_process	GO:0006412	Ribosomal_S8_sf
TraesCS4B02G000100	oxidation-reduction process	biological_process	GO:0055114	NADH_UbQ_OxRdtase_chain4L/K
TraesCS4B02G000100	oxidation-reduction process	biological_process	GO:0055114	NUOK/Mnh_C1-like
TraesCS4B02G000100	ATP synthesis coupled electron transport	biological_process	GO:0042773	NADH_UbQ_OxRdtase_chain4L/K
TraesCS4B02G000100	ATP synthesis coupled electron transport	biological_process	GO:0042773	NUOK/Mnh_C1-like
TraesCS4B02G000100	photosynthesis, light reaction	biological_process	GO:0019684	NADH_UbQ_OxRdtase_chain4L/K
TraesCS4B02G000100	photosynthesis, light reaction	biological_process	GO:0019684	NUOK/Mnh_C1-like
TraesCS4B02G124900	translation	biological_process	GO:0006412	Ribosomal_S15
TraesCS4B02G124900	translation	biological_process	GO:0006412	Ribosomal_S15_bac-type
TraesCS4B02G124900	translation	biological_process	GO:0006412	S15_NS1_RNA-bd
TraesCS4B02G129300	protein glycosylation	biological_process	GO:0006486	Exostosin
TraesCS4B02G129300	protein glycosylation	biological_process	GO:0006486	Exostosin_GT47
TraesCS4B02G158900	photosynthesis	biological_process	GO:0015979	PSII_PsbZ
TraesCS4B02G158900	photosynthesis	biological_process	GO:0015979	PSII_PsbZ_sf
TraesCS4B02G158900	photosystem II stabilization	biological_process	GO:0042549	PSII_PsbZ
TraesCS4B02G158900	photosystem II stabilization	biological_process	GO:0042549	PSII_PsbZ_sf
TraesCS4B02G238500	oxidation-reduction process	biological_process	GO:0055114	ND/Mrp_mem
TraesCS4B02G238500	oxidation-reduction process	biological_process	GO:0055114	NADH-Q_OxRdtase_suN/2
TraesCS4B02G238500	ATP synthesis coupled electron transport	biological_process	GO:0042773	ND/Mrp_mem
TraesCS4B02G238500	ATP synthesis coupled electron transport	biological_process	GO:0042773	NADH-Q_OxRdtase_suN/2
TraesCS4B02G245600	translation	biological_process	GO:0006412	Ribosomal_S2
TraesCS4B02G245600	translation	biological_process	GO:0006412	Ribosomal_S2_bac/mit/plastid
TraesCS4B02G245600	translation	biological_process	GO:0006412	Ribosomal_S2_CS
TraesCS4B02G245600	translation	biological_process	GO:0006412	Ribosomal_S2_flav_dom_sf
TraesCS4D02G151600	oxidation-reduction process	biological_process	GO:0055114	ND/Mrp_mem
TraesCS4D02G151600	oxidation-reduction process	biological_process	GO:0055114	NADH-Q_OxRdtase_suN/2
TraesCS4D02G151600	ATP synthesis coupled electron transport	biological_process	GO:0042773	ND/Mrp_mem
TraesCS4D02G151600	ATP synthesis coupled electron transport	biological_process	GO:0042773	NADH-Q_OxRdtase_suN/2
TraesCS4D02G206800	translation	biological_process	GO:0006412	Ribosomal_S15
TraesCS4D02G206800	translation	biological_process	GO:0006412	Ribosomal_S15_bac-type
TraesCS4D02G206800	translation	biological_process	GO:0006412	S15_NS1_RNA-bd
TraesCS4D02G362200	translation	biological_process	GO:0006412	Ribosomal_S19
TraesCS4D02G362200	translation	biological_process	GO:0006412	Ribosomal_S19_SF
TraesCS5A02G010700	oxidation-reduction process	biological_process	GO:0055114	NADH_UbQ/plastoQ_OxRdtase_su6
TraesCS5A02G010700	oxidation-reduction process	biological_process	GO:0055114	Nuo/plastoQ_OxRdtase_6_NuoJ
TraesCS5A02G019900	ATP synthesis coupled proton transport	biological_process	GO:0015986	ATPase_F1/V1/A1_a/bsu_nucl-bd
TraesCS5A02G019900	ATP synthesis coupled proton transport	biological_process	GO:0015986	ATP_synth_asu_C
TraesCS5A02G019900	ATP synthesis coupled proton transport	biological_process	GO:0015986	ATPase_F1/V1/A1_a/bsu_N
TraesCS5A02G019900	ATP synthesis coupled proton transport	biological_process	GO:0015986	ATP_synth_F1_asu
TraesCS5A02G019900	ATP synthesis coupled proton transport	biological_process	GO:0015986	ATPase_a/bsu_AS
TraesCS5A02G019900	ATP synthesis coupled proton transport	biological_process	GO:0015986	ATP_synth_asu-like_sf
TraesCS5A02G019900	ATP synthesis coupled proton transport	biological_process	GO:0015986	P-loop_NTPase
TraesCS5A02G019900	ATP synthesis coupled proton transport	biological_process	GO:0015986	ATP_synth_F1_a
TraesCS5A02G019900	ATP synthesis coupled proton transport	biological_process	GO:0015986	ATPase_F1/V1/A1_a/bsu_N_sf
TraesCS5A02G019900	ATP synthesis coupled proton transport	biological_process	GO:0015986	ATP_synth_asu_C_sf
TraesCS5A02G019900	ATP metabolic process	biological_process	GO:0046034	ATPase_F1/V1/A1_a/bsu_nucl-bd
TraesCS5A02G019900	ATP metabolic process	biological_process	GO:0046034	ATP_synth_asu_C
TraesCS5A02G019900	ATP metabolic process	biological_process	GO:0046034	ATPase_F1/V1/A1_a/bsu_N
TraesCS5A02G019900	ATP metabolic process	biological_process	GO:0046034	ATP_synth_F1_asu
TraesCS5A02G019900	ATP metabolic process	biological_process	GO:0046034	ATPase_a/bsu_AS
TraesCS5A02G019900	ATP metabolic process	biological_process	GO:0046034	ATP_synth_asu-like_sf
TraesCS5A02G019900	ATP metabolic process	biological_process	GO:0046034	P-loop_NTPase
TraesCS5A02G019900	ATP metabolic process	biological_process	GO:0046034	ATP_synth_F1_a
TraesCS5A02G019900	ATP metabolic process	biological_process	GO:0046034	ATPase_F1/V1/A1_a/bsu_N_sf
TraesCS5A02G019900	ATP metabolic process	biological_process	GO:0046034	ATP_synth_asu_C_sf
TraesCS5A02G019900	proton transmembrane transport	biological_process	GO:1902600	ATPase_F1/V1/A1_a/bsu_nucl-bd
TraesCS5A02G019900	proton transmembrane transport	biological_process	GO:1902600	ATP_synth_asu_C
TraesCS5A02G019900	proton transmembrane transport	biological_process	GO:1902600	ATPase_F1/V1/A1_a/bsu_N
TraesCS5A02G019900	proton transmembrane transport	biological_process	GO:1902600	ATP_synth_F1_asu
TraesCS5A02G019900	proton transmembrane transport	biological_process	GO:1902600	ATPase_a/bsu_AS
TraesCS5A02G019900	proton transmembrane transport	biological_process	GO:1902600	ATP_synth_asu-like_sf
TraesCS5A02G019900	proton transmembrane transport	biological_process	GO:1902600	P-loop_NTPase
TraesCS5A02G019900	proton transmembrane transport	biological_process	GO:1902600	ATP_synth_F1_a
TraesCS5A02G019900	proton transmembrane transport	biological_process	GO:1902600	ATPase_F1/V1/A1_a/bsu_N_sf
TraesCS5A02G019900	proton transmembrane transport	biological_process	GO:1902600	ATP_synth_asu_C_sf
TraesCS5A02G019900	ATP biosynthetic process	biological_process	GO:0006754	ATPase_F1/V1/A1_a/bsu_nucl-bd
TraesCS5A02G019900	ATP biosynthetic process	biological_process	GO:0006754	ATP_synth_asu_C
TraesCS5A02G019900	ATP biosynthetic process	biological_process	GO:0006754	ATPase_F1/V1/A1_a/bsu_N
TraesCS5A02G019900	ATP biosynthetic process	biological_process	GO:0006754	ATP_synth_F1_asu
TraesCS5A02G019900	ATP biosynthetic process	biological_process	GO:0006754	ATPase_a/bsu_AS
TraesCS5A02G019900	ATP biosynthetic process	biological_process	GO:0006754	ATP_synth_asu-like_sf
TraesCS5A02G019900	ATP biosynthetic process	biological_process	GO:0006754	P-loop_NTPase
TraesCS5A02G019900	ATP biosynthetic process	biological_process	GO:0006754	ATP_synth_F1_a
TraesCS5A02G019900	ATP biosynthetic process	biological_process	GO:0006754	ATPase_F1/V1/A1_a/bsu_N_sf
TraesCS5A02G019900	ATP biosynthetic process	biological_process	GO:0006754	ATP_synth_asu_C_sf
TraesCS5A02G019900	ion transport	biological_process	GO:0006811	ATPase_F1/V1/A1_a/bsu_nucl-bd
TraesCS5A02G019900	ion transport	biological_process	GO:0006811	ATP_synth_asu_C
TraesCS5A02G019900	ion transport	biological_process	GO:0006811	ATPase_F1/V1/A1_a/bsu_N
TraesCS5A02G019900	ion transport	biological_process	GO:0006811	ATP_synth_F1_asu
TraesCS5A02G019900	ion transport	biological_process	GO:0006811	ATPase_a/bsu_AS
TraesCS5A02G019900	ion transport	biological_process	GO:0006811	ATP_synth_asu-like_sf
TraesCS5A02G019900	ion transport	biological_process	GO:0006811	P-loop_NTPase
TraesCS5A02G019900	ion transport	biological_process	GO:0006811	ATP_synth_F1_a
TraesCS5A02G019900	ion transport	biological_process	GO:0006811	ATPase_F1/V1/A1_a/bsu_N_sf
TraesCS5A02G019900	ion transport	biological_process	GO:0006811	ATP_synth_asu_C_sf
TraesCS5A02G066100	respiratory electron transport chain	biological_process	GO:0022904	Cyt_c_oxidase-like_su3
TraesCS5A02G066100	respiratory electron transport chain	biological_process	GO:0022904	Cyt_c_oxidase_su3_a-hlx
TraesCS5A02G066100	respiratory electron transport chain	biological_process	GO:0022904	Cyt_c/ubiquinol_Oxase_su3
TraesCS5A02G066100	respiratory electron transport chain	biological_process	GO:0022904	Cyt_c_oxase_su3_dom
TraesCS5A02G066100	respiratory electron transport chain	biological_process	GO:0022904	Cyt_c_oxidase_su3-like_sf
TraesCS5A02G066100	oxidation-reduction process	biological_process	GO:0055114	Cyt_c_oxidase-like_su3
TraesCS5A02G066100	oxidation-reduction process	biological_process	GO:0055114	Cyt_c_oxidase_su3_a-hlx
TraesCS5A02G066100	oxidation-reduction process	biological_process	GO:0055114	Cyt_c/ubiquinol_Oxase_su3
TraesCS5A02G066100	oxidation-reduction process	biological_process	GO:0055114	Cyt_c_oxase_su3_dom
TraesCS5A02G066100	oxidation-reduction process	biological_process	GO:0055114	Cyt_c_oxidase_su3-like_sf
TraesCS5A02G066100	transmembrane transport	biological_process	GO:0055085	Cyt_c_oxidase-like_su3
TraesCS5A02G066100	transmembrane transport	biological_process	GO:0055085	Cyt_c_oxidase_su3_a-hlx
TraesCS5A02G066100	transmembrane transport	biological_process	GO:0055085	Cyt_c/ubiquinol_Oxase_su3
TraesCS5A02G066100	transmembrane transport	biological_process	GO:0055085	Cyt_c_oxase_su3_dom
TraesCS5A02G066100	transmembrane transport	biological_process	GO:0055085	Cyt_c_oxidase_su3-like_sf
TraesCS5A02G066100	proton transmembrane transport	biological_process	GO:1902600	Cyt_c_oxidase-like_su3
TraesCS5A02G066100	proton transmembrane transport	biological_process	GO:1902600	Cyt_c_oxidase_su3_a-hlx
TraesCS5A02G066100	proton transmembrane transport	biological_process	GO:1902600	Cyt_c/ubiquinol_Oxase_su3
TraesCS5A02G066100	proton transmembrane transport	biological_process	GO:1902600	Cyt_c_oxase_su3_dom
TraesCS5A02G066100	proton transmembrane transport	biological_process	GO:1902600	Cyt_c_oxidase_su3-like_sf
TraesCS5A02G066100	aerobic electron transport chain	biological_process	GO:0019646	Cyt_c_oxidase-like_su3
TraesCS5A02G066100	aerobic electron transport chain	biological_process	GO:0019646	Cyt_c_oxidase_su3_a-hlx
TraesCS5A02G066100	aerobic electron transport chain	biological_process	GO:0019646	Cyt_c/ubiquinol_Oxase_su3
TraesCS5A02G066100	aerobic electron transport chain	biological_process	GO:0019646	Cyt_c_oxase_su3_dom
TraesCS5A02G066100	aerobic electron transport chain	biological_process	GO:0019646	Cyt_c_oxidase_su3-like_sf
TraesCS5A02G066100	aerobic respiration	biological_process	GO:0009060	Cyt_c_oxidase-like_su3
TraesCS5A02G066100	aerobic respiration	biological_process	GO:0009060	Cyt_c_oxidase_su3_a-hlx
TraesCS5A02G066100	aerobic respiration	biological_process	GO:0009060	Cyt_c/ubiquinol_Oxase_su3
TraesCS5A02G066100	aerobic respiration	biological_process	GO:0009060	Cyt_c_oxase_su3_dom
TraesCS5A02G066100	aerobic respiration	biological_process	GO:0009060	Cyt_c_oxidase_su3-like_sf
TraesCS5A02G066100	mitochondrial electron transport, cytochrome c to oxygen	biological_process	GO:0006123	Cyt_c_oxidase-like_su3
TraesCS5A02G066100	mitochondrial electron transport, cytochrome c to oxygen	biological_process	GO:0006123	Cyt_c_oxidase_su3_a-hlx
TraesCS5A02G066100	mitochondrial electron transport, cytochrome c to oxygen	biological_process	GO:0006123	Cyt_c/ubiquinol_Oxase_su3
TraesCS5A02G066100	mitochondrial electron transport, cytochrome c to oxygen	biological_process	GO:0006123	Cyt_c_oxase_su3_dom
TraesCS5A02G066100	mitochondrial electron transport, cytochrome c to oxygen	biological_process	GO:0006123	Cyt_c_oxidase_su3-like_sf
TraesCS5A02G272300	cytochrome complex assembly	biological_process	GO:0017004	Cyt_c_assembly
TraesCS5A02G420800	photosynthesis	biological_process	GO:0015979	PSII_PsbK
TraesCS5A02G420800	photosynthesis	biological_process	GO:0015979	PSII_PsbK_sf
TraesCS5A02G421200	translation	biological_process	GO:0006412	Ribosomal_L2
TraesCS5A02G421200	translation	biological_process	GO:0006412	Ribosomal_L2_bac/org-type
TraesCS5A02G421200	translation	biological_process	GO:0006412	Translation_prot_SH3-like_sf
TraesCS5A02G421200	translation	biological_process	GO:0006412	Rib_L2_dom2
TraesCS5A02G421200	translation	biological_process	GO:0006412	Ribosomal_L2_dom3
TraesCS5A02G421200	translation	biological_process	GO:0006412	Ribosomal_L2_C
TraesCS5A02G421200	translation	biological_process	GO:0006412	Ribosomal_L2_CS
TraesCS5A02G436700	translation	biological_process	GO:0006412	Ribosomal_L2
TraesCS5A02G436700	translation	biological_process	GO:0006412	Translation_prot_SH3-like_sf
TraesCS5A02G436700	translation	biological_process	GO:0006412	Rib_L2_dom2
TraesCS5A02G436700	translation	biological_process	GO:0006412	Ribosomal_L2_dom3
TraesCS5A02G436700	translation	biological_process	GO:0006412	Ribosomal_L2_C
TraesCS5A02G523400	photosynthesis	biological_process	GO:0015979	PSII_cyt_b559_asu
TraesCS5A02G523400	photosynthesis	biological_process	GO:0015979	PSII_cytb559_asu_lum
TraesCS5A02G523400	photosynthesis	biological_process	GO:0015979	PSII_cyt_b559_asu_sf
TraesCS5A02G523400	photosynthetic electron transport chain	biological_process	GO:0009767	PSII_cyt_b559_asu
TraesCS5A02G523400	photosynthetic electron transport chain	biological_process	GO:0009767	PSII_cytb559_asu_lum
TraesCS5A02G523400	photosynthetic electron transport chain	biological_process	GO:0009767	PSII_cyt_b559_asu_sf
TraesCS5A02G523400	photosynthesis, light reaction	biological_process	GO:0019684	PSII_cyt_b559_asu
TraesCS5A02G523400	photosynthesis, light reaction	biological_process	GO:0019684	PSII_cytb559_asu_lum
TraesCS5A02G523400	photosynthesis, light reaction	biological_process	GO:0019684	PSII_cyt_b559_asu_sf
TraesCS5B02G052600	ATP synthesis coupled proton transport	biological_process	GO:0015986	ATP_synth_b/b'su_bac/chlpt
TraesCS5B02G052700	ATP synthesis coupled proton transport	biological_process	GO:0015986	ATP_synth_F0_csu
TraesCS5B02G052700	ATP synthesis coupled proton transport	biological_process	GO:0015986	ATPase_proteolipid_c-like_dom
TraesCS5B02G052700	ATP synthesis coupled proton transport	biological_process	GO:0015986	ATP_synth_csu_bac/chlpt
TraesCS5B02G052700	ATP synthesis coupled proton transport	biological_process	GO:0015986	ATP_synth_F0_csu_DDCD_BS
TraesCS5B02G052700	ATP synthesis coupled proton transport	biological_process	GO:0015986	F/V-ATP_Csub_sf
TraesCS5B02G052700	ATP synthesis coupled proton transport	biological_process	GO:0015986	ATP_synth_F0_csu_sf
TraesCS5B02G052700	proton transmembrane transport	biological_process	GO:1902600	ATP_synth_F0_csu
TraesCS5B02G052700	proton transmembrane transport	biological_process	GO:1902600	ATPase_proteolipid_c-like_dom
TraesCS5B02G052700	proton transmembrane transport	biological_process	GO:1902600	ATP_synth_csu_bac/chlpt
TraesCS5B02G052700	proton transmembrane transport	biological_process	GO:1902600	ATP_synth_F0_csu_DDCD_BS
TraesCS5B02G052700	proton transmembrane transport	biological_process	GO:1902600	F/V-ATP_Csub_sf
TraesCS5B02G052700	proton transmembrane transport	biological_process	GO:1902600	ATP_synth_F0_csu_sf
TraesCS5B02G052700	ATP biosynthetic process	biological_process	GO:0006754	ATP_synth_F0_csu
TraesCS5B02G052700	ATP biosynthetic process	biological_process	GO:0006754	ATPase_proteolipid_c-like_dom
TraesCS5B02G052700	ATP biosynthetic process	biological_process	GO:0006754	ATP_synth_csu_bac/chlpt
TraesCS5B02G052700	ATP biosynthetic process	biological_process	GO:0006754	ATP_synth_F0_csu_DDCD_BS
TraesCS5B02G052700	ATP biosynthetic process	biological_process	GO:0006754	F/V-ATP_Csub_sf
TraesCS5B02G052700	ATP biosynthetic process	biological_process	GO:0006754	ATP_synth_F0_csu_sf
TraesCS5B02G052700	ion transport	biological_process	GO:0006811	ATP_synth_F0_csu
TraesCS5B02G052700	ion transport	biological_process	GO:0006811	ATPase_proteolipid_c-like_dom
TraesCS5B02G052700	ion transport	biological_process	GO:0006811	ATP_synth_csu_bac/chlpt
TraesCS5B02G052700	ion transport	biological_process	GO:0006811	ATP_synth_F0_csu_DDCD_BS
TraesCS5B02G052700	ion transport	biological_process	GO:0006811	F/V-ATP_Csub_sf
TraesCS5B02G052700	ion transport	biological_process	GO:0006811	ATP_synth_F0_csu_sf
TraesCS5B02G057400	response to heat	biological_process	GO:0009408	SAP_dom
TraesCS5B02G057400	response to heat	biological_process	GO:0009408	Ku_C
TraesCS5B02G057400	response to heat	biological_process	GO:0009408	Ku_N
TraesCS5B02G057400	response to heat	biological_process	GO:0009408	Ku70/Ku80_beta-barrel_dom
TraesCS5B02G057400	response to heat	biological_process	GO:0009408	Ku70
TraesCS5B02G057400	response to heat	biological_process	GO:0009408	SPOC-like_C_dom_sf
TraesCS5B02G057400	response to heat	biological_process	GO:0009408	Ku70_bridge/pillars_dom_sf
TraesCS5B02G057400	response to heat	biological_process	GO:0009408	SAP_dom_sf
TraesCS5B02G057400	response to heat	biological_process	GO:0009408	vWFA_dom_sf
TraesCS5B02G057400	telomere maintenance	biological_process	GO:0000723	SAP_dom
TraesCS5B02G057400	telomere maintenance	biological_process	GO:0000723	Ku_C
TraesCS5B02G057400	telomere maintenance	biological_process	GO:0000723	Ku_N
TraesCS5B02G057400	telomere maintenance	biological_process	GO:0000723	Ku70/Ku80_beta-barrel_dom
TraesCS5B02G057400	telomere maintenance	biological_process	GO:0000723	Ku70
TraesCS5B02G057400	telomere maintenance	biological_process	GO:0000723	SPOC-like_C_dom_sf
TraesCS5B02G057400	telomere maintenance	biological_process	GO:0000723	Ku70_bridge/pillars_dom_sf
TraesCS5B02G057400	telomere maintenance	biological_process	GO:0000723	SAP_dom_sf
TraesCS5B02G057400	telomere maintenance	biological_process	GO:0000723	vWFA_dom_sf
TraesCS5B02G057400	double-strand break repair via nonhomologous end joining	biological_process	GO:0006303	SAP_dom
TraesCS5B02G057400	double-strand break repair via nonhomologous end joining	biological_process	GO:0006303	Ku_C
TraesCS5B02G057400	double-strand break repair via nonhomologous end joining	biological_process	GO:0006303	Ku_N
TraesCS5B02G057400	double-strand break repair via nonhomologous end joining	biological_process	GO:0006303	Ku70/Ku80_beta-barrel_dom
TraesCS5B02G057400	double-strand break repair via nonhomologous end joining	biological_process	GO:0006303	Ku70
TraesCS5B02G057400	double-strand break repair via nonhomologous end joining	biological_process	GO:0006303	SPOC-like_C_dom_sf
TraesCS5B02G057400	double-strand break repair via nonhomologous end joining	biological_process	GO:0006303	Ku70_bridge/pillars_dom_sf
TraesCS5B02G057400	double-strand break repair via nonhomologous end joining	biological_process	GO:0006303	SAP_dom_sf
TraesCS5B02G057400	double-strand break repair via nonhomologous end joining	biological_process	GO:0006303	vWFA_dom_sf
TraesCS5B02G057400	DNA duplex unwinding	biological_process	GO:0032508	SAP_dom
TraesCS5B02G057400	DNA duplex unwinding	biological_process	GO:0032508	Ku_C
TraesCS5B02G057400	DNA duplex unwinding	biological_process	GO:0032508	Ku_N
TraesCS5B02G057400	DNA duplex unwinding	biological_process	GO:0032508	Ku70/Ku80_beta-barrel_dom
TraesCS5B02G057400	DNA duplex unwinding	biological_process	GO:0032508	Ku70
TraesCS5B02G057400	DNA duplex unwinding	biological_process	GO:0032508	SPOC-like_C_dom_sf
TraesCS5B02G057400	DNA duplex unwinding	biological_process	GO:0032508	Ku70_bridge/pillars_dom_sf
TraesCS5B02G057400	DNA duplex unwinding	biological_process	GO:0032508	SAP_dom_sf
TraesCS5B02G057400	DNA duplex unwinding	biological_process	GO:0032508	vWFA_dom_sf
TraesCS5B02G057400	DNA repair	biological_process	GO:0006281	SAP_dom
TraesCS5B02G057400	DNA repair	biological_process	GO:0006281	Ku_C
TraesCS5B02G057400	DNA repair	biological_process	GO:0006281	Ku_N
TraesCS5B02G057400	DNA repair	biological_process	GO:0006281	Ku70/Ku80_beta-barrel_dom
TraesCS5B02G057400	DNA repair	biological_process	GO:0006281	Ku70
TraesCS5B02G057400	DNA repair	biological_process	GO:0006281	SPOC-like_C_dom_sf
TraesCS5B02G057400	DNA repair	biological_process	GO:0006281	Ku70_bridge/pillars_dom_sf
TraesCS5B02G057400	DNA repair	biological_process	GO:0006281	SAP_dom_sf
TraesCS5B02G057400	DNA repair	biological_process	GO:0006281	vWFA_dom_sf
TraesCS5B02G234800	oxidation-reduction process	biological_process	GO:0055114	NADH_UbQ_OxRdtase_chain4L/K
TraesCS5B02G234800	oxidation-reduction process	biological_process	GO:0055114	NUOK/Mnh_C1-like
TraesCS5B02G234800	ATP synthesis coupled electron transport	biological_process	GO:0042773	NADH_UbQ_OxRdtase_chain4L/K
TraesCS5B02G234800	ATP synthesis coupled electron transport	biological_process	GO:0042773	NUOK/Mnh_C1-like
TraesCS5B02G234800	photosynthesis, light reaction	biological_process	GO:0019684	NADH_UbQ_OxRdtase_chain4L/K
TraesCS5B02G234800	photosynthesis, light reaction	biological_process	GO:0019684	NUOK/Mnh_C1-like
TraesCS5B02G234900	photosynthesis	biological_process	GO:0015979	PSI_PsaC
TraesCS5B02G234900	photosynthesis	biological_process	GO:0015979	4Fe4S_Fe-S-bd
TraesCS5B02G234900	photosynthesis	biological_process	GO:0015979	4Fe4S_Fe_S_CS
TraesCS5B02G234900	photosynthetic electron transport in photosystem I	biological_process	GO:0009773	PSI_PsaC
TraesCS5B02G234900	photosynthetic electron transport in photosystem I	biological_process	GO:0009773	4Fe4S_Fe-S-bd
TraesCS5B02G234900	photosynthetic electron transport in photosystem I	biological_process	GO:0009773	4Fe4S_Fe_S_CS
TraesCS5B02G247000	oxidation-reduction process	biological_process	GO:0055114	NADH_UbQ/plastoQ_OxRdtase_su6
TraesCS5B02G247000	oxidation-reduction process	biological_process	GO:0055114	Nuo/plastoQ_OxRdtase_6_NuoJ
TraesCS5B02G247100	oxidation-reduction process	biological_process	GO:0055114	NADH_UbQ_OxRdtase_chain4L/K
TraesCS5B02G247100	oxidation-reduction process	biological_process	GO:0055114	NUOK/Mnh_C1-like
TraesCS5B02G247100	ATP synthesis coupled electron transport	biological_process	GO:0042773	NADH_UbQ_OxRdtase_chain4L/K
TraesCS5B02G247100	ATP synthesis coupled electron transport	biological_process	GO:0042773	NUOK/Mnh_C1-like
TraesCS5B02G247200	translation	biological_process	GO:0006412	Ribosomal_L32p
TraesCS5B02G247200	translation	biological_process	GO:0006412	Ribosomal_zn-bd
TraesCS5B02G312400	translational initiation	biological_process	GO:0006413	TIF_IF1
TraesCS5B02G312400	translational initiation	biological_process	GO:0006413	RNA-binding_domain_S1_IF1
TraesCS5B02G312400	translational initiation	biological_process	GO:0006413	NA-bd_OB-fold
TraesCS5B02G312400	translational initiation	biological_process	GO:0006413	S1_dom
TraesCS5B02G312400	translation	biological_process	GO:0006412	TIF_IF1
TraesCS5B02G312400	translation	biological_process	GO:0006412	RNA-binding_domain_S1_IF1
TraesCS5B02G312400	translation	biological_process	GO:0006412	NA-bd_OB-fold
TraesCS5B02G312400	translation	biological_process	GO:0006412	S1_dom
TraesCS5D02G007600	transcription, DNA-templated	biological_process	GO:0006351	DNA-dir_RNAP_su2_dom
TraesCS5D02G007600	transcription, DNA-templated	biological_process	GO:0006351	RNA_pol_Rpb2_7
TraesCS5D02G007600	transcription, DNA-templated	biological_process	GO:0006351	DNA-dir_RNA_pol_su2
TraesCS5D02G007600	transcription, DNA-templated	biological_process	GO:0006351	DNA-dir_RNAP_su2_hyb_sf
TraesCS5D02G007700	photosynthesis	biological_process	GO:0015979	PSII_PsbM
TraesCS5D02G007700	photosynthesis	biological_process	GO:0015979	PSII_PsbM_sf
TraesCS5D02G007700	photosynthesis, light reaction	biological_process	GO:0019684	PSII_PsbM
TraesCS5D02G007700	photosynthesis, light reaction	biological_process	GO:0019684	PSII_PsbM_sf
TraesCS5D02G008400	translation	biological_process	GO:0006412	Ribosomal_S19
TraesCS5D02G008400	translation	biological_process	GO:0006412	Ribosomal_S19_bac-type
TraesCS5D02G008400	translation	biological_process	GO:0006412	Ribosomal_S19_CS
TraesCS5D02G008400	translation	biological_process	GO:0006412	Ribosomal_S19_SF
TraesCS5D02G009000	oxidation-reduction process	biological_process	GO:0055114	ND/Mrp_mem
TraesCS5D02G009000	oxidation-reduction process	biological_process	GO:0055114	NADH-Q_OxRdtase_suN/2
TraesCS5D02G009000	ATP synthesis coupled electron transport	biological_process	GO:0042773	ND/Mrp_mem
TraesCS5D02G009000	ATP synthesis coupled electron transport	biological_process	GO:0042773	NADH-Q_OxRdtase_suN/2
TraesCS5D02G009400	proteolysis	biological_process	GO:0006508	ClpP
TraesCS5D02G009400	proteolysis	biological_process	GO:0006508	ClpP/TepA
TraesCS5D02G009400	proteolysis	biological_process	GO:0006508	ClpP/crotonase-like_dom_sf
TraesCS5D02G009400	proteolysis	biological_process	GO:0006508	ClpP_His_AS
TraesCS5D02G010000	photosynthesis	biological_process	GO:0015979	PSI_Ycf4_assembly
TraesCS5D02G010200	carbon fixation	biological_process	GO:0015977	RuBisCO_lsu_C
TraesCS5D02G010200	carbon fixation	biological_process	GO:0015977	RuBisCO_lsu_fd_N
TraesCS5D02G010200	carbon fixation	biological_process	GO:0015977	RuBisCo_large_chain_AS
TraesCS5D02G010200	carbon fixation	biological_process	GO:0015977	RuBisCO_lsuI
TraesCS5D02G010200	carbon fixation	biological_process	GO:0015977	RuBisCO
TraesCS5D02G010200	carbon fixation	biological_process	GO:0015977	RuBisCO_lsu_C_sf
TraesCS5D02G010200	carbon fixation	biological_process	GO:0015977	RuBisCO_lsu_N_sf
TraesCS5D02G010500	oxidation-reduction process	biological_process	GO:0055114	NADH_UbQ/plastoQ_OxRdtase_su3
TraesCS5D02G010500	oxidation-reduction process	biological_process	GO:0055114	NAD(P)H_OxRDtase_bac/plastid
TraesCS5D02G010500	oxidation-reduction process	biological_process	GO:0055114	NDAH_ubi_oxred_su3_sf
TraesCS5D02G010700	oxidation-reduction process	biological_process	GO:0055114	NADH_UbQ_OxRdtase_30kDa_su
TraesCS5D02G010700	oxidation-reduction process	biological_process	GO:0055114	NADH_UbQ_OxRdtase_CS
TraesCS5D02G010700	oxidation-reduction process	biological_process	GO:0055114	NADH_quin_OxRdtase_su_C/D-like
TraesCS5D02G010800	translation	biological_process	GO:0006412	Ribosomal_S4/S9_N
TraesCS5D02G010800	translation	biological_process	GO:0006412	S4_RNA-bd
TraesCS5D02G010800	translation	biological_process	GO:0006412	Ribosomal_S4_bac-type
TraesCS5D02G010800	translation	biological_process	GO:0006412	Ribosomal_S4_CS
TraesCS5D02G010800	translation	biological_process	GO:0006412	Ribosomal_S4/S9
TraesCS5D02G010800	translation	biological_process	GO:0006412	S4_RNA-bd_sf
TraesCS5D02G010900	photosynthesis	biological_process	GO:0015979	PSI_PsaA/B
TraesCS5D02G010900	photosynthesis	biological_process	GO:0015979	PSI_PsaA
TraesCS5D02G010900	photosynthesis	biological_process	GO:0015979	PSI_PsaA/B_CS
TraesCS5D02G010900	photosynthesis	biological_process	GO:0015979	PSI_PsaA/B_sf
TraesCS5D02G010900	oxidation-reduction process	biological_process	GO:0055114	PSI_PsaA/B
TraesCS5D02G010900	oxidation-reduction process	biological_process	GO:0055114	PSI_PsaA
TraesCS5D02G010900	oxidation-reduction process	biological_process	GO:0055114	PSI_PsaA/B_CS
TraesCS5D02G010900	oxidation-reduction process	biological_process	GO:0055114	PSI_PsaA/B_sf
TraesCS5D02G010900	electron transport chain	biological_process	GO:0022900	PSI_PsaA/B
TraesCS5D02G010900	electron transport chain	biological_process	GO:0022900	PSI_PsaA
TraesCS5D02G010900	electron transport chain	biological_process	GO:0022900	PSI_PsaA/B_CS
TraesCS5D02G010900	electron transport chain	biological_process	GO:0022900	PSI_PsaA/B_sf
TraesCS5D02G010900	protein-chromophore linkage	biological_process	GO:0018298	PSI_PsaA/B
TraesCS5D02G010900	protein-chromophore linkage	biological_process	GO:0018298	PSI_PsaA
TraesCS5D02G010900	protein-chromophore linkage	biological_process	GO:0018298	PSI_PsaA/B_CS
TraesCS5D02G010900	protein-chromophore linkage	biological_process	GO:0018298	PSI_PsaA/B_sf
TraesCS5D02G011200	ATP synthesis coupled proton transport	biological_process	GO:0015986	ATP_synth_F0_csu
TraesCS5D02G011200	ATP synthesis coupled proton transport	biological_process	GO:0015986	ATPase_proteolipid_c-like_dom
TraesCS5D02G011200	ATP synthesis coupled proton transport	biological_process	GO:0015986	ATP_synth_csu_bac/chlpt
TraesCS5D02G011200	ATP synthesis coupled proton transport	biological_process	GO:0015986	ATP_synth_F0_csu_DDCD_BS
TraesCS5D02G011200	ATP synthesis coupled proton transport	biological_process	GO:0015986	F/V-ATP_Csub_sf
TraesCS5D02G011200	ATP synthesis coupled proton transport	biological_process	GO:0015986	ATP_synth_F0_csu_sf
TraesCS5D02G011200	proton transmembrane transport	biological_process	GO:1902600	ATP_synth_F0_csu
TraesCS5D02G011200	proton transmembrane transport	biological_process	GO:1902600	ATPase_proteolipid_c-like_dom
TraesCS5D02G011200	proton transmembrane transport	biological_process	GO:1902600	ATP_synth_csu_bac/chlpt
TraesCS5D02G011200	proton transmembrane transport	biological_process	GO:1902600	ATP_synth_F0_csu_DDCD_BS
TraesCS5D02G011200	proton transmembrane transport	biological_process	GO:1902600	F/V-ATP_Csub_sf
TraesCS5D02G011200	proton transmembrane transport	biological_process	GO:1902600	ATP_synth_F0_csu_sf
TraesCS5D02G011200	ATP biosynthetic process	biological_process	GO:0006754	ATP_synth_F0_csu
TraesCS5D02G011200	ATP biosynthetic process	biological_process	GO:0006754	ATPase_proteolipid_c-like_dom
TraesCS5D02G011200	ATP biosynthetic process	biological_process	GO:0006754	ATP_synth_csu_bac/chlpt
TraesCS5D02G011200	ATP biosynthetic process	biological_process	GO:0006754	ATP_synth_F0_csu_DDCD_BS
TraesCS5D02G011200	ATP biosynthetic process	biological_process	GO:0006754	F/V-ATP_Csub_sf
TraesCS5D02G011200	ATP biosynthetic process	biological_process	GO:0006754	ATP_synth_F0_csu_sf
TraesCS5D02G011200	ion transport	biological_process	GO:0006811	ATP_synth_F0_csu
TraesCS5D02G011200	ion transport	biological_process	GO:0006811	ATPase_proteolipid_c-like_dom
TraesCS5D02G011200	ion transport	biological_process	GO:0006811	ATP_synth_csu_bac/chlpt
TraesCS5D02G011200	ion transport	biological_process	GO:0006811	ATP_synth_F0_csu_DDCD_BS
TraesCS5D02G011200	ion transport	biological_process	GO:0006811	F/V-ATP_Csub_sf
TraesCS5D02G011200	ion transport	biological_process	GO:0006811	ATP_synth_F0_csu_sf
TraesCS5D02G011400	translation	biological_process	GO:0006412	Ribosomal_S2
TraesCS5D02G011400	translation	biological_process	GO:0006412	Ribosomal_S2_bac/mit/plastid
TraesCS5D02G011400	translation	biological_process	GO:0006412	Ribosomal_S2_CS
TraesCS5D02G011400	translation	biological_process	GO:0006412	Ribosomal_S2_flav_dom_sf
TraesCS5D02G151000	photosynthesis	biological_process	GO:0015979	PSI_PsaJ
TraesCS5D02G151000	photosynthesis	biological_process	GO:0015979	PSI_PsaJ_sf
TraesCS5D02G196700	ATP synthesis coupled proton transport	biological_process	GO:0015986	ATP_synth_F0_csu
TraesCS5D02G196700	ATP synthesis coupled proton transport	biological_process	GO:0015986	ATPase_proteolipid_c-like_dom
TraesCS5D02G196700	ATP synthesis coupled proton transport	biological_process	GO:0015986	ATP_synth_csu_bac/chlpt
TraesCS5D02G196700	ATP synthesis coupled proton transport	biological_process	GO:0015986	ATP_synth_F0_csu_DDCD_BS
TraesCS5D02G196700	ATP synthesis coupled proton transport	biological_process	GO:0015986	F/V-ATP_Csub_sf
TraesCS5D02G196700	ATP synthesis coupled proton transport	biological_process	GO:0015986	ATP_synth_F0_csu_sf
TraesCS5D02G196700	proton transmembrane transport	biological_process	GO:1902600	ATP_synth_F0_csu
TraesCS5D02G196700	proton transmembrane transport	biological_process	GO:1902600	ATPase_proteolipid_c-like_dom
TraesCS5D02G196700	proton transmembrane transport	biological_process	GO:1902600	ATP_synth_csu_bac/chlpt
TraesCS5D02G196700	proton transmembrane transport	biological_process	GO:1902600	ATP_synth_F0_csu_DDCD_BS
TraesCS5D02G196700	proton transmembrane transport	biological_process	GO:1902600	F/V-ATP_Csub_sf
TraesCS5D02G196700	proton transmembrane transport	biological_process	GO:1902600	ATP_synth_F0_csu_sf
TraesCS5D02G196700	ATP biosynthetic process	biological_process	GO:0006754	ATP_synth_F0_csu
TraesCS5D02G196700	ATP biosynthetic process	biological_process	GO:0006754	ATPase_proteolipid_c-like_dom
TraesCS5D02G196700	ATP biosynthetic process	biological_process	GO:0006754	ATP_synth_csu_bac/chlpt
TraesCS5D02G196700	ATP biosynthetic process	biological_process	GO:0006754	ATP_synth_F0_csu_DDCD_BS
TraesCS5D02G196700	ATP biosynthetic process	biological_process	GO:0006754	F/V-ATP_Csub_sf
TraesCS5D02G196700	ATP biosynthetic process	biological_process	GO:0006754	ATP_synth_F0_csu_sf
TraesCS5D02G196700	ion transport	biological_process	GO:0006811	ATP_synth_F0_csu
TraesCS5D02G196700	ion transport	biological_process	GO:0006811	ATPase_proteolipid_c-like_dom
TraesCS5D02G196700	ion transport	biological_process	GO:0006811	ATP_synth_csu_bac/chlpt
TraesCS5D02G196700	ion transport	biological_process	GO:0006811	ATP_synth_F0_csu_DDCD_BS
TraesCS5D02G196700	ion transport	biological_process	GO:0006811	F/V-ATP_Csub_sf
TraesCS5D02G196700	ion transport	biological_process	GO:0006811	ATP_synth_F0_csu_sf
TraesCS5D02G219900	translation	biological_process	GO:0006412	Ribosomal_L22
TraesCS5D02G219900	translation	biological_process	GO:0006412	Ribosomal_L22_bac/chlpt-type
TraesCS5D02G219900	translation	biological_process	GO:0006412	Ribosomal_L22/L17_sf
TraesCS5D02G220000	translation	biological_process	GO:0006412	Ribosomal_L14P
TraesCS5D02G220000	translation	biological_process	GO:0006412	Ribosomal_L14P_bac-type
TraesCS5D02G220000	translation	biological_process	GO:0006412	Ribosomal_L14P_CS
TraesCS5D02G220000	translation	biological_process	GO:0006412	Ribosomal_L14_sf
TraesCS5D02G220400	photosynthesis	biological_process	GO:0015979	Cyt_6/f_cplx_su5
TraesCS5D02G220400	photosynthesis	biological_process	GO:0015979	Cyt_6/f_cplx_su5_sf
TraesCS5D02G220400	cytochrome complex assembly	biological_process	GO:0017004	Cyt_6/f_cplx_su5
TraesCS5D02G220400	cytochrome complex assembly	biological_process	GO:0017004	Cyt_6/f_cplx_su5_sf
TraesCS5D02G220400	oxidation-reduction process	biological_process	GO:0055114	Cyt_6/f_cplx_su5
TraesCS5D02G220400	oxidation-reduction process	biological_process	GO:0055114	Cyt_6/f_cplx_su5_sf
TraesCS5D02G220400	electron transport chain	biological_process	GO:0022900	Cyt_6/f_cplx_su5
TraesCS5D02G220400	electron transport chain	biological_process	GO:0022900	Cyt_6/f_cplx_su5_sf
TraesCS5D02G220600	photosynthesis	biological_process	GO:0015979	PSII_cyt_b559_CS
TraesCS5D02G220600	photosynthesis	biological_process	GO:0015979	PSII_cyt_b559_asu
TraesCS5D02G220600	photosynthesis	biological_process	GO:0015979	PSII_cyt_b559_N
TraesCS5D02G220600	photosynthesis	biological_process	GO:0015979	PSII_cytb559_asu_lum
TraesCS5D02G220600	photosynthesis	biological_process	GO:0015979	PSII_cyt_b559_asu_sf
TraesCS5D02G220600	photosynthetic electron transport chain	biological_process	GO:0009767	PSII_cyt_b559_CS
TraesCS5D02G220600	photosynthetic electron transport chain	biological_process	GO:0009767	PSII_cyt_b559_asu
TraesCS5D02G220600	photosynthetic electron transport chain	biological_process	GO:0009767	PSII_cyt_b559_N
TraesCS5D02G220600	photosynthetic electron transport chain	biological_process	GO:0009767	PSII_cytb559_asu_lum
TraesCS5D02G220600	photosynthetic electron transport chain	biological_process	GO:0009767	PSII_cyt_b559_asu_sf
TraesCS5D02G220600	photosynthesis, light reaction	biological_process	GO:0019684	PSII_cyt_b559_CS
TraesCS5D02G220600	photosynthesis, light reaction	biological_process	GO:0019684	PSII_cyt_b559_asu
TraesCS5D02G220600	photosynthesis, light reaction	biological_process	GO:0019684	PSII_cyt_b559_N
TraesCS5D02G220600	photosynthesis, light reaction	biological_process	GO:0019684	PSII_cytb559_asu_lum
TraesCS5D02G220600	photosynthesis, light reaction	biological_process	GO:0019684	PSII_cyt_b559_asu_sf
TraesCS5D02G220700	photosynthesis	biological_process	GO:0015979	PSII_cyt_b559_bsu
TraesCS5D02G220700	photosynthesis	biological_process	GO:0015979	PSII_cyt_b559_N
TraesCS5D02G220700	photosynthetic electron transport chain	biological_process	GO:0009767	PSII_cyt_b559_bsu
TraesCS5D02G220700	photosynthetic electron transport chain	biological_process	GO:0009767	PSII_cyt_b559_N
TraesCS5D02G220700	photosynthesis, light reaction	biological_process	GO:0019684	PSII_cyt_b559_bsu
TraesCS5D02G220700	photosynthesis, light reaction	biological_process	GO:0019684	PSII_cyt_b559_N
TraesCS5D02G221500	photosynthesis	biological_process	GO:0015979	PSII_PsbN
TraesCS5D02G221600	respiratory electron transport chain	biological_process	GO:0022904	Cyt_b/b6_N
TraesCS5D02G221600	respiratory electron transport chain	biological_process	GO:0022904	Di-haem_cyt_TM
TraesCS5D02G221600	respiratory electron transport chain	biological_process	GO:0022904	Cyt_B6_PetB
TraesCS5D02G221600	respiratory electron transport chain	biological_process	GO:0022904	Cytb/b6-like_sf
TraesCS5D02G326900	translation	biological_process	GO:0006412	Ribosomal_L22
TraesCS5D02G326900	translation	biological_process	GO:0006412	Ribosomal_L22_bac/chlpt-type
TraesCS5D02G326900	translation	biological_process	GO:0006412	Ribosomal_L22/L17_sf
TraesCS5D02G376700	translation	biological_process	GO:0006412	Ribosomal_S15
TraesCS5D02G376700	translation	biological_process	GO:0006412	Ribosomal_S15_bac-type
TraesCS5D02G376700	translation	biological_process	GO:0006412	S15_NS1_RNA-bd
TraesCS5D02G376800	oxidation-reduction process	biological_process	GO:0055114	NADH_Q_OxRdtase_suD
TraesCS5D02G376800	oxidation-reduction process	biological_process	GO:0055114	NiFe-Hase_large
TraesCS5D02G376800	oxidation-reduction process	biological_process	GO:0055114	NADH_Q_OxRdtase_suD_sf
TraesCS5D02G376900	translation	biological_process	GO:0006412	Ribosomal_L20
TraesCS5D02G376900	translation	biological_process	GO:0006412	Ribosomal_protein_L20_C
TraesCS5D02G377000	translation	biological_process	GO:0006412	Ribosomal_S18
TraesCS5D02G377000	translation	biological_process	GO:0006412	Ribosomal_S18_CS
TraesCS5D02G377000	translation	biological_process	GO:0006412	Ribosomal_S18_sf
TraesCS5D02G425000	photosynthesis	biological_process	GO:0015979	PSI_Ycf4_assembly
TraesCS5D02G425200	mRNA processing	biological_process	GO:0006397	Maturase_MatK
TraesCS5D02G425200	mRNA processing	biological_process	GO:0006397	Domain_X
TraesCS5D02G425200	mRNA processing	biological_process	GO:0006397	Maturase_MatK_N
TraesCS5D02G425200	tRNA processing	biological_process	GO:0008033	Maturase_MatK
TraesCS5D02G425200	tRNA processing	biological_process	GO:0008033	Domain_X
TraesCS5D02G425200	tRNA processing	biological_process	GO:0008033	Maturase_MatK_N
TraesCS5D02G425200	RNA splicing	biological_process	GO:0008380	Maturase_MatK
TraesCS5D02G425200	RNA splicing	biological_process	GO:0008380	Domain_X
TraesCS5D02G425200	RNA splicing	biological_process	GO:0008380	Maturase_MatK_N
TraesCS5D02G456300	photosynthetic electron transport chain	biological_process	GO:0009767	Cyt_b/b6_C
TraesCS5D02G456300	photosynthetic electron transport chain	biological_process	GO:0009767	Cyt_b6/f_cplx_suIV
TraesCS5D02G456300	photosynthetic electron transport chain	biological_process	GO:0009767	Cyt_b/b6_C_sf
TraesCS5D02G456400	translation	biological_process	GO:0006412	Ribosomal_S8
TraesCS5D02G456400	translation	biological_process	GO:0006412	Ribosomal_S8_sf
TraesCS5D02G456500	translation	biological_process	GO:0006412	Ribosomal_L14P
TraesCS5D02G456500	translation	biological_process	GO:0006412	Ribosomal_L14P_bac-type
TraesCS5D02G456500	translation	biological_process	GO:0006412	Ribosomal_L14P_CS
TraesCS5D02G456500	translation	biological_process	GO:0006412	Ribosomal_L14_sf
TraesCS5D02G456600	translation	biological_process	GO:0006412	Ribosomal_S3_C
TraesCS5D02G456600	translation	biological_process	GO:0006412	Ribosomal_S3_bac-typ
TraesCS5D02G456600	translation	biological_process	GO:0006412	KH_sf_prok-type
TraesCS5D02G456600	translation	biological_process	GO:0006412	Ribosomal_S3_C_sf
TraesCS5D02G456700	translation	biological_process	GO:0006412	Ribosomal_L22
TraesCS5D02G456700	translation	biological_process	GO:0006412	Ribosomal_L22_bac/chlpt-type
TraesCS5D02G456700	translation	biological_process	GO:0006412	Ribosomal_L22/L17_sf
TraesCS5D02G457200	translation	biological_process	GO:0006412	Ribosomal_L32p
TraesCS5D02G457600	oxidation-reduction process	biological_process	GO:0055114	ND/Mrp_mem
TraesCS5D02G457600	oxidation-reduction process	biological_process	GO:0055114	NADH-Q_OxRdtase_suN/2
TraesCS5D02G457600	ATP synthesis coupled electron transport	biological_process	GO:0042773	ND/Mrp_mem
TraesCS5D02G457600	ATP synthesis coupled electron transport	biological_process	GO:0042773	NADH-Q_OxRdtase_suN/2
TraesCS5D02G458000	translation	biological_process	GO:0006412	Ribosomal_L2
TraesCS5D02G458000	translation	biological_process	GO:0006412	Ribosomal_L2_bac/org-type
TraesCS5D02G458000	translation	biological_process	GO:0006412	Translation_prot_SH3-like_sf
TraesCS5D02G458000	translation	biological_process	GO:0006412	Rib_L2_dom2
TraesCS5D02G458000	translation	biological_process	GO:0006412	Ribosomal_L2_dom3
TraesCS5D02G458000	translation	biological_process	GO:0006412	Ribosomal_L2_C
TraesCS5D02G458000	translation	biological_process	GO:0006412	Ribosomal_L2_CS
TraesCS5D02G458300	photosynthesis	biological_process	GO:0015979	PSII_PsbZ
TraesCS5D02G458300	photosynthesis	biological_process	GO:0015979	PSII_PsbZ_sf
TraesCS5D02G458300	photosystem II stabilization	biological_process	GO:0042549	PSII_PsbZ
TraesCS5D02G458300	photosystem II stabilization	biological_process	GO:0042549	PSII_PsbZ_sf
TraesCS5D02G458600	translation	biological_process	GO:0006412	Ribosomal_S2
TraesCS5D02G458600	translation	biological_process	GO:0006412	Ribosomal_S2_bac/mit/plastid
TraesCS5D02G458600	translation	biological_process	GO:0006412	Ribosomal_S2_CS
TraesCS5D02G458600	translation	biological_process	GO:0006412	Ribosomal_S2_flav_dom_sf
TraesCS5D02G458900	ATP synthesis coupled proton transport	biological_process	GO:0015986	ATPase_F1/V1/A1_a/bsu_nucl-bd
TraesCS5D02G458900	ATP synthesis coupled proton transport	biological_process	GO:0015986	ATP_synth_asu_C
TraesCS5D02G458900	ATP synthesis coupled proton transport	biological_process	GO:0015986	ATPase_F1/V1/A1_a/bsu_N
TraesCS5D02G458900	ATP synthesis coupled proton transport	biological_process	GO:0015986	ATP_synth_F1_asu
TraesCS5D02G458900	ATP synthesis coupled proton transport	biological_process	GO:0015986	ATPase_a/bsu_AS
TraesCS5D02G458900	ATP synthesis coupled proton transport	biological_process	GO:0015986	ATP_synth_asu-like_sf
TraesCS5D02G458900	ATP synthesis coupled proton transport	biological_process	GO:0015986	P-loop_NTPase
TraesCS5D02G458900	ATP synthesis coupled proton transport	biological_process	GO:0015986	ATP_synth_F1_a
TraesCS5D02G458900	ATP synthesis coupled proton transport	biological_process	GO:0015986	ATPase_F1/V1/A1_a/bsu_N_sf
TraesCS5D02G458900	ATP synthesis coupled proton transport	biological_process	GO:0015986	ATP_synth_asu_C_sf
TraesCS5D02G458900	ATP metabolic process	biological_process	GO:0046034	ATPase_F1/V1/A1_a/bsu_nucl-bd
TraesCS5D02G458900	ATP metabolic process	biological_process	GO:0046034	ATP_synth_asu_C
TraesCS5D02G458900	ATP metabolic process	biological_process	GO:0046034	ATPase_F1/V1/A1_a/bsu_N
TraesCS5D02G458900	ATP metabolic process	biological_process	GO:0046034	ATP_synth_F1_asu
TraesCS5D02G458900	ATP metabolic process	biological_process	GO:0046034	ATPase_a/bsu_AS
TraesCS5D02G458900	ATP metabolic process	biological_process	GO:0046034	ATP_synth_asu-like_sf
TraesCS5D02G458900	ATP metabolic process	biological_process	GO:0046034	P-loop_NTPase
TraesCS5D02G458900	ATP metabolic process	biological_process	GO:0046034	ATP_synth_F1_a
TraesCS5D02G458900	ATP metabolic process	biological_process	GO:0046034	ATPase_F1/V1/A1_a/bsu_N_sf
TraesCS5D02G458900	ATP metabolic process	biological_process	GO:0046034	ATP_synth_asu_C_sf
TraesCS5D02G458900	proton transmembrane transport	biological_process	GO:1902600	ATPase_F1/V1/A1_a/bsu_nucl-bd
TraesCS5D02G458900	proton transmembrane transport	biological_process	GO:1902600	ATP_synth_asu_C
TraesCS5D02G458900	proton transmembrane transport	biological_process	GO:1902600	ATPase_F1/V1/A1_a/bsu_N
TraesCS5D02G458900	proton transmembrane transport	biological_process	GO:1902600	ATP_synth_F1_asu
TraesCS5D02G458900	proton transmembrane transport	biological_process	GO:1902600	ATPase_a/bsu_AS
TraesCS5D02G458900	proton transmembrane transport	biological_process	GO:1902600	ATP_synth_asu-like_sf
TraesCS5D02G458900	proton transmembrane transport	biological_process	GO:1902600	P-loop_NTPase
TraesCS5D02G458900	proton transmembrane transport	biological_process	GO:1902600	ATP_synth_F1_a
TraesCS5D02G458900	proton transmembrane transport	biological_process	GO:1902600	ATPase_F1/V1/A1_a/bsu_N_sf
TraesCS5D02G458900	proton transmembrane transport	biological_process	GO:1902600	ATP_synth_asu_C_sf
TraesCS5D02G458900	ATP biosynthetic process	biological_process	GO:0006754	ATPase_F1/V1/A1_a/bsu_nucl-bd
TraesCS5D02G458900	ATP biosynthetic process	biological_process	GO:0006754	ATP_synth_asu_C
TraesCS5D02G458900	ATP biosynthetic process	biological_process	GO:0006754	ATPase_F1/V1/A1_a/bsu_N
TraesCS5D02G458900	ATP biosynthetic process	biological_process	GO:0006754	ATP_synth_F1_asu
TraesCS5D02G458900	ATP biosynthetic process	biological_process	GO:0006754	ATPase_a/bsu_AS
TraesCS5D02G458900	ATP biosynthetic process	biological_process	GO:0006754	ATP_synth_asu-like_sf
TraesCS5D02G458900	ATP biosynthetic process	biological_process	GO:0006754	P-loop_NTPase
TraesCS5D02G458900	ATP biosynthetic process	biological_process	GO:0006754	ATP_synth_F1_a
TraesCS5D02G458900	ATP biosynthetic process	biological_process	GO:0006754	ATPase_F1/V1/A1_a/bsu_N_sf
TraesCS5D02G458900	ATP biosynthetic process	biological_process	GO:0006754	ATP_synth_asu_C_sf
TraesCS5D02G458900	ion transport	biological_process	GO:0006811	ATPase_F1/V1/A1_a/bsu_nucl-bd
TraesCS5D02G458900	ion transport	biological_process	GO:0006811	ATP_synth_asu_C
TraesCS5D02G458900	ion transport	biological_process	GO:0006811	ATPase_F1/V1/A1_a/bsu_N
TraesCS5D02G458900	ion transport	biological_process	GO:0006811	ATP_synth_F1_asu
TraesCS5D02G458900	ion transport	biological_process	GO:0006811	ATPase_a/bsu_AS
TraesCS5D02G458900	ion transport	biological_process	GO:0006811	ATP_synth_asu-like_sf
TraesCS5D02G458900	ion transport	biological_process	GO:0006811	P-loop_NTPase
TraesCS5D02G458900	ion transport	biological_process	GO:0006811	ATP_synth_F1_a
TraesCS5D02G458900	ion transport	biological_process	GO:0006811	ATPase_F1/V1/A1_a/bsu_N_sf
TraesCS5D02G458900	ion transport	biological_process	GO:0006811	ATP_synth_asu_C_sf
TraesCS5D02G459000	oxidation-reduction process	biological_process	GO:0055114	NADH_UbQ_OxRdtase-like_20kDa
TraesCS5D02G459000	oxidation-reduction process	biological_process	GO:0055114	NADH_UQ_OxRdtase_20Kd_su
TraesCS5D02G459000	photosynthesis, light reaction	biological_process	GO:0019684	NADH_UbQ_OxRdtase-like_20kDa
TraesCS5D02G459000	photosynthesis, light reaction	biological_process	GO:0019684	NADH_UQ_OxRdtase_20Kd_su
TraesCS5D02G459000	aerobic respiration	biological_process	GO:0009060	NADH_UbQ_OxRdtase-like_20kDa
TraesCS5D02G459000	aerobic respiration	biological_process	GO:0009060	NADH_UQ_OxRdtase_20Kd_su
TraesCS5D02G459000	electron transport coupled proton transport	biological_process	GO:0015990	NADH_UbQ_OxRdtase-like_20kDa
TraesCS5D02G459000	electron transport coupled proton transport	biological_process	GO:0015990	NADH_UQ_OxRdtase_20Kd_su
TraesCS5D02G459200	ATP synthesis coupled proton transport	biological_process	GO:0015986	ATP_synth_F0_csu
TraesCS5D02G459200	ATP synthesis coupled proton transport	biological_process	GO:0015986	ATPase_proteolipid_c-like_dom
TraesCS5D02G459200	ATP synthesis coupled proton transport	biological_process	GO:0015986	ATP_synth_csu_bac/chlpt
TraesCS5D02G459200	ATP synthesis coupled proton transport	biological_process	GO:0015986	ATP_synth_F0_csu_DDCD_BS
TraesCS5D02G459200	ATP synthesis coupled proton transport	biological_process	GO:0015986	F/V-ATP_Csub_sf
TraesCS5D02G459200	ATP synthesis coupled proton transport	biological_process	GO:0015986	ATP_synth_F0_csu_sf
TraesCS5D02G459200	proton transmembrane transport	biological_process	GO:1902600	ATP_synth_F0_csu
TraesCS5D02G459200	proton transmembrane transport	biological_process	GO:1902600	ATPase_proteolipid_c-like_dom
TraesCS5D02G459200	proton transmembrane transport	biological_process	GO:1902600	ATP_synth_csu_bac/chlpt
TraesCS5D02G459200	proton transmembrane transport	biological_process	GO:1902600	ATP_synth_F0_csu_DDCD_BS
TraesCS5D02G459200	proton transmembrane transport	biological_process	GO:1902600	F/V-ATP_Csub_sf
TraesCS5D02G459200	proton transmembrane transport	biological_process	GO:1902600	ATP_synth_F0_csu_sf
TraesCS5D02G459400	ATP synthesis coupled proton transport	biological_process	GO:0015986	ATPase_F1/V1/A1_a/bsu_nucl-bd
TraesCS5D02G459400	ATP synthesis coupled proton transport	biological_process	GO:0015986	ATP_synth_asu_C
TraesCS5D02G459400	ATP synthesis coupled proton transport	biological_process	GO:0015986	ATPase_F1/V1/A1_a/bsu_N
TraesCS5D02G459400	ATP synthesis coupled proton transport	biological_process	GO:0015986	ATP_synth_F1_asu
TraesCS5D02G459400	ATP synthesis coupled proton transport	biological_process	GO:0015986	ATPase_a/bsu_AS
TraesCS5D02G459400	ATP synthesis coupled proton transport	biological_process	GO:0015986	ATP_synth_asu-like_sf
TraesCS5D02G459400	ATP synthesis coupled proton transport	biological_process	GO:0015986	P-loop_NTPase
TraesCS5D02G459400	ATP synthesis coupled proton transport	biological_process	GO:0015986	ATP_synth_F1_a
TraesCS5D02G459400	ATP synthesis coupled proton transport	biological_process	GO:0015986	ATPase_F1/V1/A1_a/bsu_N_sf
TraesCS5D02G459400	ATP synthesis coupled proton transport	biological_process	GO:0015986	ATP_synth_asu_C_sf
TraesCS5D02G459400	ATP metabolic process	biological_process	GO:0046034	ATPase_F1/V1/A1_a/bsu_nucl-bd
TraesCS5D02G459400	ATP metabolic process	biological_process	GO:0046034	ATP_synth_asu_C
TraesCS5D02G459400	ATP metabolic process	biological_process	GO:0046034	ATPase_F1/V1/A1_a/bsu_N
TraesCS5D02G459400	ATP metabolic process	biological_process	GO:0046034	ATP_synth_F1_asu
TraesCS5D02G459400	ATP metabolic process	biological_process	GO:0046034	ATPase_a/bsu_AS
TraesCS5D02G459400	ATP metabolic process	biological_process	GO:0046034	ATP_synth_asu-like_sf
TraesCS5D02G459400	ATP metabolic process	biological_process	GO:0046034	P-loop_NTPase
TraesCS5D02G459400	ATP metabolic process	biological_process	GO:0046034	ATP_synth_F1_a
TraesCS5D02G459400	ATP metabolic process	biological_process	GO:0046034	ATPase_F1/V1/A1_a/bsu_N_sf
TraesCS5D02G459400	ATP metabolic process	biological_process	GO:0046034	ATP_synth_asu_C_sf
TraesCS5D02G459400	proton transmembrane transport	biological_process	GO:1902600	ATPase_F1/V1/A1_a/bsu_nucl-bd
TraesCS5D02G459400	proton transmembrane transport	biological_process	GO:1902600	ATP_synth_asu_C
TraesCS5D02G459400	proton transmembrane transport	biological_process	GO:1902600	ATPase_F1/V1/A1_a/bsu_N
TraesCS5D02G459400	proton transmembrane transport	biological_process	GO:1902600	ATP_synth_F1_asu
TraesCS5D02G459400	proton transmembrane transport	biological_process	GO:1902600	ATPase_a/bsu_AS
TraesCS5D02G459400	proton transmembrane transport	biological_process	GO:1902600	ATP_synth_asu-like_sf
TraesCS5D02G459400	proton transmembrane transport	biological_process	GO:1902600	P-loop_NTPase
TraesCS5D02G459400	proton transmembrane transport	biological_process	GO:1902600	ATP_synth_F1_a
TraesCS5D02G459400	proton transmembrane transport	biological_process	GO:1902600	ATPase_F1/V1/A1_a/bsu_N_sf
TraesCS5D02G459400	proton transmembrane transport	biological_process	GO:1902600	ATP_synth_asu_C_sf
TraesCS5D02G459400	ion transport	biological_process	GO:0006811	ATPase_F1/V1/A1_a/bsu_nucl-bd
TraesCS5D02G459400	ion transport	biological_process	GO:0006811	ATP_synth_asu_C
TraesCS5D02G459400	ion transport	biological_process	GO:0006811	ATPase_F1/V1/A1_a/bsu_N
TraesCS5D02G459400	ion transport	biological_process	GO:0006811	ATP_synth_F1_asu
TraesCS5D02G459400	ion transport	biological_process	GO:0006811	ATPase_a/bsu_AS
TraesCS5D02G459400	ion transport	biological_process	GO:0006811	ATP_synth_asu-like_sf
TraesCS5D02G459400	ion transport	biological_process	GO:0006811	P-loop_NTPase
TraesCS5D02G459400	ion transport	biological_process	GO:0006811	ATP_synth_F1_a
TraesCS5D02G459400	ion transport	biological_process	GO:0006811	ATPase_F1/V1/A1_a/bsu_N_sf
TraesCS5D02G459400	ion transport	biological_process	GO:0006811	ATP_synth_asu_C_sf
TraesCS5D02G488200	translation	biological_process	GO:0006412	Ribosomal_L32p
TraesCS5D02G544600	photosynthesis	biological_process	GO:0015979	Cyt_6/f_cplx_su5
TraesCS5D02G544600	photosynthesis	biological_process	GO:0015979	Cyt_6/f_cplx_su5_sf
TraesCS5D02G544600	cytochrome complex assembly	biological_process	GO:0017004	Cyt_6/f_cplx_su5
TraesCS5D02G544600	cytochrome complex assembly	biological_process	GO:0017004	Cyt_6/f_cplx_su5_sf
TraesCS5D02G544600	oxidation-reduction process	biological_process	GO:0055114	Cyt_6/f_cplx_su5
TraesCS5D02G544600	oxidation-reduction process	biological_process	GO:0055114	Cyt_6/f_cplx_su5_sf
TraesCS5D02G544600	electron transport chain	biological_process	GO:0022900	Cyt_6/f_cplx_su5
TraesCS5D02G544600	electron transport chain	biological_process	GO:0022900	Cyt_6/f_cplx_su5_sf
TraesCS5D02G559700	photosynthesis	biological_process	GO:0015979	PSII_PsbH
TraesCS5D02G559700	photosynthesis	biological_process	GO:0015979	PSII_PsbH_sf
TraesCS5D02G559700	protein stabilization	biological_process	GO:0050821	PSII_PsbH
TraesCS5D02G559700	protein stabilization	biological_process	GO:0050821	PSII_PsbH_sf
TraesCS5D02G559800	photosynthetic electron transport chain	biological_process	GO:0009767	Cyt_b/b6_C
TraesCS5D02G559800	photosynthetic electron transport chain	biological_process	GO:0009767	Cyt_b6/f_cplx_suIV
TraesCS5D02G559800	photosynthetic electron transport chain	biological_process	GO:0009767	Cyt_b/b6_C_sf
TraesCS5D02G559800	oxidation-reduction process	biological_process	GO:0055114	Cyt_b/b6_C
TraesCS5D02G559800	oxidation-reduction process	biological_process	GO:0055114	Cyt_b6/f_cplx_suIV
TraesCS5D02G559800	oxidation-reduction process	biological_process	GO:0055114	Cyt_b/b6_C_sf
TraesCS5D02G559800	photosynthesis	biological_process	GO:0015979	Cyt_b/b6_C
TraesCS5D02G559800	photosynthesis	biological_process	GO:0015979	Cyt_b6/f_cplx_suIV
TraesCS5D02G559800	photosynthesis	biological_process	GO:0015979	Cyt_b/b6_C_sf
TraesCS5D02G559900	translation	biological_process	GO:0006412	Ribosomal_S8
TraesCS5D02G559900	translation	biological_process	GO:0006412	Ribosomal_S8_sf
TraesCS5D02G560000	translation	biological_process	GO:0006412	Ribosomal_L14P
TraesCS5D02G560000	translation	biological_process	GO:0006412	Ribosomal_L14P_bac-type
TraesCS5D02G560000	translation	biological_process	GO:0006412	Ribosomal_L14P_CS
TraesCS5D02G560000	translation	biological_process	GO:0006412	Ribosomal_L14_sf
TraesCS6A02G114300	oxidation-reduction process	biological_process	GO:0055114	ND/Mrp_mem
TraesCS6A02G114300	oxidation-reduction process	biological_process	GO:0055114	NADH-Q_OxRdtase_suN/2
TraesCS6A02G114300	ATP synthesis coupled electron transport	biological_process	GO:0042773	ND/Mrp_mem
TraesCS6A02G114300	ATP synthesis coupled electron transport	biological_process	GO:0042773	NADH-Q_OxRdtase_suN/2
TraesCS6A02G176100	photosynthesis	biological_process	GO:0015979	PSI_PsaI
TraesCS6A02G176100	photosynthesis	biological_process	GO:0015979	PSI_PsaI_sf
TraesCS6A02G192100	translation	biological_process	GO:0006412	Ribosomal_S19
TraesCS6A02G192100	translation	biological_process	GO:0006412	Ribosomal_S19_bac-type
TraesCS6A02G192100	translation	biological_process	GO:0006412	Ribosomal_S19_CS
TraesCS6A02G192100	translation	biological_process	GO:0006412	Ribosomal_S19_SF
TraesCS6A02G192100	ribosomal small subunit assembly	biological_process	GO:0000028	Ribosomal_S19
TraesCS6A02G192100	ribosomal small subunit assembly	biological_process	GO:0000028	Ribosomal_S19_bac-type
TraesCS6A02G192100	ribosomal small subunit assembly	biological_process	GO:0000028	Ribosomal_S19_CS
TraesCS6A02G192100	ribosomal small subunit assembly	biological_process	GO:0000028	Ribosomal_S19_SF
TraesCS6A02G192200	translation	biological_process	GO:0006412	Ribosomal_L22
TraesCS6A02G192200	translation	biological_process	GO:0006412	Ribosomal_L22_bac/chlpt-type
TraesCS6A02G192200	translation	biological_process	GO:0006412	Ribosomal_L22/L17_sf
TraesCS6A02G194000	transcription, DNA-templated	biological_process	GO:0006351	Ribosomal_S11
TraesCS6A02G194000	transcription, DNA-templated	biological_process	GO:0006351	RNAP_asu_C
TraesCS6A02G194000	transcription, DNA-templated	biological_process	GO:0006351	DNA-dir_RNA_pol_insert
TraesCS6A02G194000	transcription, DNA-templated	biological_process	GO:0006351	DNA-dir_RNA_pol_RpoA/D/Rpb3
TraesCS6A02G194000	transcription, DNA-templated	biological_process	GO:0006351	DNA-dir_RpoA
TraesCS6A02G194000	transcription, DNA-templated	biological_process	GO:0006351	RBP11-like
TraesCS6A02G194000	transcription, DNA-templated	biological_process	GO:0006351	RNApol_insert_sf
TraesCS6A02G194000	transcription, DNA-templated	biological_process	GO:0006351	Ribosomal_S11_sf
TraesCS6A02G194000	translation	biological_process	GO:0006412	Ribosomal_S11
TraesCS6A02G194000	translation	biological_process	GO:0006412	RNAP_asu_C
TraesCS6A02G194000	translation	biological_process	GO:0006412	DNA-dir_RNA_pol_insert
TraesCS6A02G194000	translation	biological_process	GO:0006412	DNA-dir_RNA_pol_RpoA/D/Rpb3
TraesCS6A02G194000	translation	biological_process	GO:0006412	DNA-dir_RpoA
TraesCS6A02G194000	translation	biological_process	GO:0006412	RBP11-like
TraesCS6A02G194000	translation	biological_process	GO:0006412	RNApol_insert_sf
TraesCS6A02G194000	translation	biological_process	GO:0006412	Ribosomal_S11_sf
TraesCS6A02G194100	translation	biological_process	GO:0006412	Ribosomal_S8
TraesCS6A02G194100	translation	biological_process	GO:0006412	Ribosomal_S8_sf
TraesCS6A02G397100	protein transport by the Tat complex	biological_process	GO:0043953	TatC
TraesCS6A02G397100	intracellular protein transmembrane transport	biological_process	GO:0065002	TatC
TraesCS6B02G038000	translation	biological_process	GO:0006412	Ribosomal_S4/S9_N
TraesCS6B02G038000	translation	biological_process	GO:0006412	S4_RNA-bd
TraesCS6B02G038000	translation	biological_process	GO:0006412	Ribosomal_S4_bac-type
TraesCS6B02G038000	translation	biological_process	GO:0006412	Ribosomal_S4_CS
TraesCS6B02G038000	translation	biological_process	GO:0006412	Ribosomal_S4/S9
TraesCS6B02G038000	translation	biological_process	GO:0006412	S4_RNA-bd_sf
TraesCS6B02G131700	ATP synthesis coupled proton transport	biological_process	GO:0015986	ATP_synth_F0_asu
TraesCS6B02G131700	ATP synthesis coupled proton transport	biological_process	GO:0015986	ATP_synth_F0_asu_AS
TraesCS6B02G131700	ATP synthesis coupled proton transport	biological_process	GO:0015986	F0_ATP_A_sf
TraesCS6B02G208100	photosynthesis	biological_process	GO:0015979	PSI_PsaA/B
TraesCS6B02G208100	photosynthesis	biological_process	GO:0015979	PSI_PsaA
TraesCS6B02G208100	photosynthesis	biological_process	GO:0015979	PSI_PsaA/B_CS
TraesCS6B02G208100	photosynthesis	biological_process	GO:0015979	PSI_PsaA/B_sf
TraesCS6B02G338800	oxidation-reduction process	biological_process	GO:0055114	NADH_UbQ/plastoQ_OxRdtase_su3
TraesCS6B02G338800	oxidation-reduction process	biological_process	GO:0055114	NDAH_ubi_oxred_su3_sf
TraesCS6B02G388100	translational initiation	biological_process	GO:0006413	Translation_initiation_fac_3
TraesCS6B02G388100	translational initiation	biological_process	GO:0006413	Translation_initiation_fac_3_N
TraesCS6B02G388100	translational initiation	biological_process	GO:0006413	Translation_initiation_fac_3_C
TraesCS6B02G388100	translational initiation	biological_process	GO:0006413	T_IF-3_N_sf
TraesCS6B02G388100	translational initiation	biological_process	GO:0006413	T_IF-3_C_sf
TraesCS6D02G057600	photosynthesis	biological_process	GO:0015979	PSII_PsbK
TraesCS6D02G057600	photosynthesis	biological_process	GO:0015979	PSII_PsbK_sf
TraesCS6D02G079700	photosynthesis	biological_process	GO:0015979	PSII_PsbK
TraesCS6D02G079700	photosynthesis	biological_process	GO:0015979	PSII_PsbK_sf
TraesCS6D02G079800	mRNA processing	biological_process	GO:0006397	Maturase_MatK
TraesCS6D02G079800	mRNA processing	biological_process	GO:0006397	Maturase_MatK_N
TraesCS6D02G158700	oxidation-reduction process	biological_process	GO:0055114	ND/Mrp_mem
TraesCS6D02G158700	oxidation-reduction process	biological_process	GO:0055114	NADH-Q_OxRdtase_suN/2
TraesCS6D02G158700	ATP synthesis coupled electron transport	biological_process	GO:0042773	ND/Mrp_mem
TraesCS6D02G158700	ATP synthesis coupled electron transport	biological_process	GO:0042773	NADH-Q_OxRdtase_suN/2
TraesCS6D02G175000	translation	biological_process	GO:0006412	Ribosomal_S3_C
TraesCS6D02G175000	translation	biological_process	GO:0006412	Ribosomal_S3_bac-typ
TraesCS6D02G175000	translation	biological_process	GO:0006412	KH_sf_prok-type
TraesCS6D02G175000	translation	biological_process	GO:0006412	Ribosomal_S3_CS
TraesCS6D02G175000	translation	biological_process	GO:0006412	Ribosomal_S3_C_sf
TraesCS6D02G175100	translation	biological_process	GO:0006412	Ribosomal_L22
TraesCS6D02G175100	translation	biological_process	GO:0006412	Ribosomal_L22_bac/chlpt-type
TraesCS6D02G175100	translation	biological_process	GO:0006412	Ribosomal_L22/L17_CS
TraesCS6D02G175100	translation	biological_process	GO:0006412	Ribosomal_L22/L17_sf
TraesCS6D02G175100	ribosome assembly	biological_process	GO:0042255	Ribosomal_L22
TraesCS6D02G175100	ribosome assembly	biological_process	GO:0042255	Ribosomal_L22_bac/chlpt-type
TraesCS6D02G175100	ribosome assembly	biological_process	GO:0042255	Ribosomal_L22/L17_CS
TraesCS6D02G175100	ribosome assembly	biological_process	GO:0042255	Ribosomal_L22/L17_sf
TraesCS6D02G175200	translation	biological_process	GO:0006412	Ribosomal_L2
TraesCS6D02G175200	translation	biological_process	GO:0006412	Ribosomal_L2_bac/org-type
TraesCS6D02G175200	translation	biological_process	GO:0006412	Translation_prot_SH3-like_sf
TraesCS6D02G175200	translation	biological_process	GO:0006412	Rib_L2_dom2
TraesCS6D02G175200	translation	biological_process	GO:0006412	Ribosomal_L2_dom3
TraesCS6D02G175200	translation	biological_process	GO:0006412	Ribosomal_L2_C
TraesCS6D02G175200	translation	biological_process	GO:0006412	Ribosomal_L2_CS
TraesCS6D02G325300	photosynthesis	biological_process	GO:0015979	PSI_Ycf4_assembly
TraesCS6D02G325400	photosynthesis	biological_process	GO:0015979	PSI_PsaI
TraesCS6D02G325400	photosynthesis	biological_process	GO:0015979	PSI_PsaI_sf
TraesCS6D02G325600	photosynthesis	biological_process	GO:0015979	PSII_PsbL
TraesCS6D02G325600	photosynthesis	biological_process	GO:0015979	PSII_PsbL_sf
TraesCS6D02G325800	photosynthesis	biological_process	GO:0015979	PSII_cyt_b559_CS
TraesCS6D02G325800	photosynthesis	biological_process	GO:0015979	PSII_cyt_b559_asu
TraesCS6D02G325800	photosynthesis	biological_process	GO:0015979	PSII_cyt_b559_N
TraesCS6D02G325800	photosynthesis	biological_process	GO:0015979	PSII_cytb559_asu_lum
TraesCS6D02G325800	photosynthesis	biological_process	GO:0015979	PSII_cyt_b559_asu_sf
TraesCS6D02G325800	photosynthetic electron transport chain	biological_process	GO:0009767	PSII_cyt_b559_CS
TraesCS6D02G325800	photosynthetic electron transport chain	biological_process	GO:0009767	PSII_cyt_b559_asu
TraesCS6D02G325800	photosynthetic electron transport chain	biological_process	GO:0009767	PSII_cyt_b559_N
TraesCS6D02G325800	photosynthetic electron transport chain	biological_process	GO:0009767	PSII_cytb559_asu_lum
TraesCS6D02G325800	photosynthetic electron transport chain	biological_process	GO:0009767	PSII_cyt_b559_asu_sf
TraesCS6D02G325800	photosynthesis, light reaction	biological_process	GO:0019684	PSII_cyt_b559_CS
TraesCS6D02G325800	photosynthesis, light reaction	biological_process	GO:0019684	PSII_cyt_b559_asu
TraesCS6D02G325800	photosynthesis, light reaction	biological_process	GO:0019684	PSII_cyt_b559_N
TraesCS6D02G325800	photosynthesis, light reaction	biological_process	GO:0019684	PSII_cytb559_asu_lum
TraesCS6D02G325800	photosynthesis, light reaction	biological_process	GO:0019684	PSII_cyt_b559_asu_sf
TraesCS6D02G326000	photosynthesis	biological_process	GO:0015979	Cyt_6/f_cplx_su5
TraesCS6D02G326000	photosynthesis	biological_process	GO:0015979	Cyt_6/f_cplx_su5_sf
TraesCS6D02G326000	cytochrome complex assembly	biological_process	GO:0017004	Cyt_6/f_cplx_su5
TraesCS6D02G326000	cytochrome complex assembly	biological_process	GO:0017004	Cyt_6/f_cplx_su5_sf
TraesCS6D02G326000	oxidation-reduction process	biological_process	GO:0055114	Cyt_6/f_cplx_su5
TraesCS6D02G326000	oxidation-reduction process	biological_process	GO:0055114	Cyt_6/f_cplx_su5_sf
TraesCS6D02G326000	electron transport chain	biological_process	GO:0022900	Cyt_6/f_cplx_su5
TraesCS6D02G326000	electron transport chain	biological_process	GO:0022900	Cyt_6/f_cplx_su5_sf
TraesCS6D02G326100	photosynthesis	biological_process	GO:0015979	PSI_PsaJ
TraesCS6D02G326100	photosynthesis	biological_process	GO:0015979	PSI_PsaJ_sf
TraesCS7A02G011200	cytochrome complex assembly	biological_process	GO:0017004	Cyt_c_assembly
TraesCS7A02G011200	cytochrome complex assembly	biological_process	GO:0017004	Cyt_c_biogenesis_CcmC
TraesCS7A02G011200	heme transport	biological_process	GO:0015886	Cyt_c_assembly
TraesCS7A02G011200	heme transport	biological_process	GO:0015886	Cyt_c_biogenesis_CcmC
TraesCS7A02G098300	ATP synthesis coupled proton transport	biological_process	GO:0015986	ATPase_F1/V1/A1_a/bsu_nucl-bd
TraesCS7A02G098300	ATP synthesis coupled proton transport	biological_process	GO:0015986	ATP_synth_asu_C
TraesCS7A02G098300	ATP synthesis coupled proton transport	biological_process	GO:0015986	ATPase_F1/V1/A1_a/bsu_N
TraesCS7A02G098300	ATP synthesis coupled proton transport	biological_process	GO:0015986	ATP_synth_F1_asu
TraesCS7A02G098300	ATP synthesis coupled proton transport	biological_process	GO:0015986	ATPase_a/bsu_AS
TraesCS7A02G098300	ATP synthesis coupled proton transport	biological_process	GO:0015986	ATP_synth_asu-like_sf
TraesCS7A02G098300	ATP synthesis coupled proton transport	biological_process	GO:0015986	P-loop_NTPase
TraesCS7A02G098300	ATP synthesis coupled proton transport	biological_process	GO:0015986	ATP_synth_F1_a
TraesCS7A02G098300	ATP synthesis coupled proton transport	biological_process	GO:0015986	ATPase_F1/V1/A1_a/bsu_N_sf
TraesCS7A02G098300	ATP synthesis coupled proton transport	biological_process	GO:0015986	ATP_synth_asu_C_sf
TraesCS7A02G098300	ATP metabolic process	biological_process	GO:0046034	ATPase_F1/V1/A1_a/bsu_nucl-bd
TraesCS7A02G098300	ATP metabolic process	biological_process	GO:0046034	ATP_synth_asu_C
TraesCS7A02G098300	ATP metabolic process	biological_process	GO:0046034	ATPase_F1/V1/A1_a/bsu_N
TraesCS7A02G098300	ATP metabolic process	biological_process	GO:0046034	ATP_synth_F1_asu
TraesCS7A02G098300	ATP metabolic process	biological_process	GO:0046034	ATPase_a/bsu_AS
TraesCS7A02G098300	ATP metabolic process	biological_process	GO:0046034	ATP_synth_asu-like_sf
TraesCS7A02G098300	ATP metabolic process	biological_process	GO:0046034	P-loop_NTPase
TraesCS7A02G098300	ATP metabolic process	biological_process	GO:0046034	ATP_synth_F1_a
TraesCS7A02G098300	ATP metabolic process	biological_process	GO:0046034	ATPase_F1/V1/A1_a/bsu_N_sf
TraesCS7A02G098300	ATP metabolic process	biological_process	GO:0046034	ATP_synth_asu_C_sf
TraesCS7A02G098300	proton transmembrane transport	biological_process	GO:1902600	ATPase_F1/V1/A1_a/bsu_nucl-bd
TraesCS7A02G098300	proton transmembrane transport	biological_process	GO:1902600	ATP_synth_asu_C
TraesCS7A02G098300	proton transmembrane transport	biological_process	GO:1902600	ATPase_F1/V1/A1_a/bsu_N
TraesCS7A02G098300	proton transmembrane transport	biological_process	GO:1902600	ATP_synth_F1_asu
TraesCS7A02G098300	proton transmembrane transport	biological_process	GO:1902600	ATPase_a/bsu_AS
TraesCS7A02G098300	proton transmembrane transport	biological_process	GO:1902600	ATP_synth_asu-like_sf
TraesCS7A02G098300	proton transmembrane transport	biological_process	GO:1902600	P-loop_NTPase
TraesCS7A02G098300	proton transmembrane transport	biological_process	GO:1902600	ATP_synth_F1_a
TraesCS7A02G098300	proton transmembrane transport	biological_process	GO:1902600	ATPase_F1/V1/A1_a/bsu_N_sf
TraesCS7A02G098300	proton transmembrane transport	biological_process	GO:1902600	ATP_synth_asu_C_sf
TraesCS7A02G165200	oxidation-reduction process	biological_process	GO:0055114	ND/Mrp_mem
TraesCS7A02G165200	oxidation-reduction process	biological_process	GO:0055114	NADH_UbQ_OxRdtase
TraesCS7A02G165200	oxidation-reduction process	biological_process	GO:0055114	NADH_Q_OxRdtase_chainM/4
TraesCS7A02G165200	ATP synthesis coupled electron transport	biological_process	GO:0042773	ND/Mrp_mem
TraesCS7A02G165200	ATP synthesis coupled electron transport	biological_process	GO:0042773	NADH_UbQ_OxRdtase
TraesCS7A02G165200	ATP synthesis coupled electron transport	biological_process	GO:0042773	NADH_Q_OxRdtase_chainM/4
TraesCS7A02G230600	translation	biological_process	GO:0006412	Ribosomal_S8
TraesCS7A02G230600	translation	biological_process	GO:0006412	Ribosomal_S8_sf
TraesCS7A02G281200	proteolysis	biological_process	GO:0006508	Peptidase_S10
TraesCS7A02G281200	proteolysis	biological_process	GO:0006508	Ser_caboxypep_ser_AS
TraesCS7A02G281200	proteolysis	biological_process	GO:0006508	AB_hydrolase
TraesCS7A02G336600	translational elongation	biological_process	GO:0006414	EFG_V-like
TraesCS7A02G336600	translational elongation	biological_process	GO:0006414	TF_GTP-bd_dom
TraesCS7A02G336600	translational elongation	biological_process	GO:0006414	EFTu-like_2
TraesCS7A02G336600	translational elongation	biological_process	GO:0006414	Transl_elong_EFG/EF2
TraesCS7A02G336600	translational elongation	biological_process	GO:0006414	Small_GTP-bd_dom
TraesCS7A02G336600	translational elongation	biological_process	GO:0006414	Transl_elong_EFG/EF2_IV
TraesCS7A02G336600	translational elongation	biological_process	GO:0006414	Transl_B-barrel_sf
TraesCS7A02G336600	translational elongation	biological_process	GO:0006414	EFG_III
TraesCS7A02G336600	translational elongation	biological_process	GO:0006414	Ribosomal_S5_D2-typ_fold_subgr
TraesCS7A02G336600	translational elongation	biological_process	GO:0006414	Ribosomal_S5_D2-typ_fold
TraesCS7A02G336600	translational elongation	biological_process	GO:0006414	P-loop_NTPase
TraesCS7A02G336600	translational elongation	biological_process	GO:0006414	G_TR_CS
TraesCS7A02G336600	translational elongation	biological_process	GO:0006414	EFG_III/V
TraesCS7A02G336600	translational elongation	biological_process	GO:0006414	EFG_II
TraesCS7A02G336600	translational elongation	biological_process	GO:0006414	EFG_V
TraesCS7A02G526400	oxidation-reduction process	biological_process	GO:0055114	NADH_Q_OxRdtase_suD
TraesCS7A02G526400	oxidation-reduction process	biological_process	GO:0055114	NiFe-Hase_large
TraesCS7A02G526400	oxidation-reduction process	biological_process	GO:0055114	NADH_Q_OxRdtase_suD_sf
TraesCS7B02G046500	photosynthesis	biological_process	GO:0015979	PSII_PsbN
TraesCS7B02G080400	oxidation-reduction process	biological_process	GO:0055114	NADH_UbQ_OxRdtase_su1/FPO
TraesCS7B02G080400	oxidation-reduction process	biological_process	GO:0055114	NADH_UbQ_OxRdtase_su1_CS
TraesCS7B02G118000	translation	biological_process	GO:0006412	Ribosomal_S2
TraesCS7B02G118000	translation	biological_process	GO:0006412	Ribosomal_S2_bac/mit/plastid
TraesCS7B02G118000	translation	biological_process	GO:0006412	Ribosomal_S2_CS
TraesCS7B02G118000	translation	biological_process	GO:0006412	Ribosomal_S2_flav_dom_sf
TraesCS7B02G250400	oxidation-reduction process	biological_process	GO:0055114	Acyl-CoA_oxidase_C
TraesCS7B02G250400	oxidation-reduction process	biological_process	GO:0055114	Acyl-CoA_Oxase/DH_cen-dom
TraesCS7B02G250400	oxidation-reduction process	biological_process	GO:0055114	AcylCo_DH/oxidase_C
TraesCS7B02G250400	oxidation-reduction process	biological_process	GO:0055114	AcylCoA_DH/oxidase_NM_dom
TraesCS7B02G250400	oxidation-reduction process	biological_process	GO:0055114	Acyl-CoA_oxidase
TraesCS7B02G250400	oxidation-reduction process	biological_process	GO:0055114	AcylCo_DH-like_C
TraesCS7B02G250400	fatty acid metabolic process	biological_process	GO:0006631	Acyl-CoA_oxidase_C
TraesCS7B02G250400	fatty acid metabolic process	biological_process	GO:0006631	Acyl-CoA_Oxase/DH_cen-dom
TraesCS7B02G250400	fatty acid metabolic process	biological_process	GO:0006631	AcylCo_DH/oxidase_C
TraesCS7B02G250400	fatty acid metabolic process	biological_process	GO:0006631	AcylCoA_DH/oxidase_NM_dom
TraesCS7B02G250400	fatty acid metabolic process	biological_process	GO:0006631	Acyl-CoA_oxidase
TraesCS7B02G250400	fatty acid metabolic process	biological_process	GO:0006631	AcylCo_DH-like_C
TraesCS7B02G250400	fatty acid beta-oxidation	biological_process	GO:0006635	Acyl-CoA_oxidase_C
TraesCS7B02G250400	fatty acid beta-oxidation	biological_process	GO:0006635	Acyl-CoA_Oxase/DH_cen-dom
TraesCS7B02G250400	fatty acid beta-oxidation	biological_process	GO:0006635	AcylCo_DH/oxidase_C
TraesCS7B02G250400	fatty acid beta-oxidation	biological_process	GO:0006635	AcylCoA_DH/oxidase_NM_dom
TraesCS7B02G250400	fatty acid beta-oxidation	biological_process	GO:0006635	Acyl-CoA_oxidase
TraesCS7B02G250400	fatty acid beta-oxidation	biological_process	GO:0006635	AcylCo_DH-like_C
TraesCS7B02G395600	oxidation-reduction process	biological_process	GO:0055114	NADH_plast_OxRdtase_su_I
TraesCS7B02G395600	oxidation-reduction process	biological_process	GO:0055114	4Fe4S_Fe-S-bd
TraesCS7B02G395600	oxidation-reduction process	biological_process	GO:0055114	4Fe4S_Fe_S_CS
TraesCS7B02G395800	ATP synthesis coupled proton transport	biological_process	GO:0015986	ATPase_F1/V1/A1_a/bsu_nucl-bd
TraesCS7B02G395800	ATP synthesis coupled proton transport	biological_process	GO:0015986	ATP_synth_asu_C
TraesCS7B02G395800	ATP synthesis coupled proton transport	biological_process	GO:0015986	ATP_synth_F1_asu
TraesCS7B02G395800	ATP synthesis coupled proton transport	biological_process	GO:0015986	ATPase_a/bsu_AS
TraesCS7B02G395800	ATP synthesis coupled proton transport	biological_process	GO:0015986	P-loop_NTPase
TraesCS7B02G395800	ATP synthesis coupled proton transport	biological_process	GO:0015986	ATP_synth_F1_a
TraesCS7B02G395800	ATP synthesis coupled proton transport	biological_process	GO:0015986	ATP_synth_asu_C_sf
TraesCS7B02G429200	translation	biological_process	GO:0006412	Ribosomal_S13
TraesCS7B02G429200	translation	biological_process	GO:0006412	Ribosomal_S13-like_H2TH
TraesCS7B02G429200	translation	biological_process	GO:0006412	30s_Rbsml_prot_S13_C
TraesCS7B02G457100	ATP synthesis coupled proton transport	biological_process	GO:0015986	ATP_synth_F0_asu
TraesCS7B02G457100	ATP synthesis coupled proton transport	biological_process	GO:0015986	ATP_synth_F0_asu_AS
TraesCS7B02G457100	ATP synthesis coupled proton transport	biological_process	GO:0015986	F0_ATP_A_sf
TraesCS7B02G457100	ATP biosynthetic process	biological_process	GO:0006754	ATP_synth_F0_asu
TraesCS7B02G457100	ATP biosynthetic process	biological_process	GO:0006754	ATP_synth_F0_asu_AS
TraesCS7B02G457100	ATP biosynthetic process	biological_process	GO:0006754	F0_ATP_A_sf
TraesCS7B02G457100	ion transport	biological_process	GO:0006811	ATP_synth_F0_asu
TraesCS7B02G457100	ion transport	biological_process	GO:0006811	ATP_synth_F0_asu_AS
TraesCS7B02G457100	ion transport	biological_process	GO:0006811	F0_ATP_A_sf
TraesCS7B02G458600	photosynthesis	biological_process	GO:0015979	PSII_cyt_b559_CS
TraesCS7B02G458600	photosynthesis	biological_process	GO:0015979	PSII_cyt_b559_asu
TraesCS7B02G458600	photosynthesis	biological_process	GO:0015979	PSII_cyt_b559_N
TraesCS7B02G458600	photosynthesis	biological_process	GO:0015979	PSII_cytb559_asu_lum
TraesCS7B02G458600	photosynthesis	biological_process	GO:0015979	PSII_cyt_b559_asu_sf
TraesCS7B02G458600	photosynthetic electron transport chain	biological_process	GO:0009767	PSII_cyt_b559_CS
TraesCS7B02G458600	photosynthetic electron transport chain	biological_process	GO:0009767	PSII_cyt_b559_asu
TraesCS7B02G458600	photosynthetic electron transport chain	biological_process	GO:0009767	PSII_cyt_b559_N
TraesCS7B02G458600	photosynthetic electron transport chain	biological_process	GO:0009767	PSII_cytb559_asu_lum
TraesCS7B02G458600	photosynthetic electron transport chain	biological_process	GO:0009767	PSII_cyt_b559_asu_sf
TraesCS7B02G458600	photosynthesis, light reaction	biological_process	GO:0019684	PSII_cyt_b559_CS
TraesCS7B02G458600	photosynthesis, light reaction	biological_process	GO:0019684	PSII_cyt_b559_asu
TraesCS7B02G458600	photosynthesis, light reaction	biological_process	GO:0019684	PSII_cyt_b559_N
TraesCS7B02G458600	photosynthesis, light reaction	biological_process	GO:0019684	PSII_cytb559_asu_lum
TraesCS7B02G458600	photosynthesis, light reaction	biological_process	GO:0019684	PSII_cyt_b559_asu_sf
TraesCS7B02G487000	ATP synthesis coupled proton transport	biological_process	GO:0015986	ATP_synth_F0_asu
TraesCS7B02G487000	ATP synthesis coupled proton transport	biological_process	GO:0015986	ATP_synth_F0_asu_AS
TraesCS7B02G487000	ATP synthesis coupled proton transport	biological_process	GO:0015986	F0_ATP_A_sf
TraesCS7B02G488300	oxidation-reduction process	biological_process	GO:0055114	NADH_UbQ_OxRdtase
TraesCS7B02G488300	ATP synthesis coupled electron transport	biological_process	GO:0042773	NADH_UbQ_OxRdtase
TraesCS7D02G123900	photosynthesis	biological_process	GO:0015979	PSII_PsbI
TraesCS7D02G123900	photosynthesis	biological_process	GO:0015979	PSII_PsbI_sf
TraesCS7D02G254800	translation	biological_process	GO:0006412	Ribosomal_L22
TraesCS7D02G254800	translation	biological_process	GO:0006412	Ribosomal_L22_bac/chlpt-type
TraesCS7D02G254800	translation	biological_process	GO:0006412	Ribosomal_L22/L17_CS
TraesCS7D02G254800	translation	biological_process	GO:0006412	Ribosomal_L22/L17_sf
TraesCS7D02G254900	translation	biological_process	GO:0006412	Ribosomal_S19
TraesCS7D02G254900	translation	biological_process	GO:0006412	Ribosomal_S19_bac-type
TraesCS7D02G254900	translation	biological_process	GO:0006412	Ribosomal_S19_CS
TraesCS7D02G254900	translation	biological_process	GO:0006412	Ribosomal_S19_SF
TraesCS7D02G255200	oxidation-reduction process	biological_process	GO:0055114	NADH_UbQ_OxRdtase-like_20kDa
TraesCS7D02G255200	oxidation-reduction process	biological_process	GO:0055114	NADH_UQ_OxRdtase_20Kd_su
TraesCS7D02G255700	oxidation-reduction process	biological_process	GO:0055114	NADH_UbQ_OxRdtase_chain4L/K
TraesCS7D02G255700	oxidation-reduction process	biological_process	GO:0055114	NUOK/Mnh_C1-like
TraesCS7D02G255700	ATP synthesis coupled electron transport	biological_process	GO:0042773	NADH_UbQ_OxRdtase_chain4L/K
TraesCS7D02G255700	ATP synthesis coupled electron transport	biological_process	GO:0042773	NUOK/Mnh_C1-like
TraesCS7D02G255800	oxidation-reduction process	biological_process	GO:0055114	NADH_UbQ_OxRdtase_30kDa_su
TraesCS7D02G255800	oxidation-reduction process	biological_process	GO:0055114	NADH_quin_OxRdtase_su_C/D-like
TraesCS7D02G285800	oxidation-reduction process	biological_process	GO:0055114	ND/Mrp_mem
TraesCS7D02G285800	ATP synthesis coupled electron transport	biological_process	GO:0042773	ND/Mrp_mem
TraesCS7D02G346400	oxidation-reduction process	biological_process	GO:0055114	Acyl-CoA_oxidase_C
TraesCS7D02G346400	oxidation-reduction process	biological_process	GO:0055114	Acyl-CoA_Oxase/DH_cen-dom
TraesCS7D02G346400	oxidation-reduction process	biological_process	GO:0055114	AcylCo_DH/oxidase_C
TraesCS7D02G346400	oxidation-reduction process	biological_process	GO:0055114	AcylCoA_DH/oxidase_NM_dom
TraesCS7D02G346400	oxidation-reduction process	biological_process	GO:0055114	Acyl-CoA_oxidase
TraesCS7D02G346400	oxidation-reduction process	biological_process	GO:0055114	AcylCo_DH-like_C
TraesCS7D02G346400	fatty acid metabolic process	biological_process	GO:0006631	Acyl-CoA_oxidase_C
TraesCS7D02G346400	fatty acid metabolic process	biological_process	GO:0006631	Acyl-CoA_Oxase/DH_cen-dom
TraesCS7D02G346400	fatty acid metabolic process	biological_process	GO:0006631	AcylCo_DH/oxidase_C
TraesCS7D02G346400	fatty acid metabolic process	biological_process	GO:0006631	AcylCoA_DH/oxidase_NM_dom
TraesCS7D02G346400	fatty acid metabolic process	biological_process	GO:0006631	Acyl-CoA_oxidase
TraesCS7D02G346400	fatty acid metabolic process	biological_process	GO:0006631	AcylCo_DH-like_C
TraesCS7D02G346400	fatty acid beta-oxidation	biological_process	GO:0006635	Acyl-CoA_oxidase_C
TraesCS7D02G346400	fatty acid beta-oxidation	biological_process	GO:0006635	Acyl-CoA_Oxase/DH_cen-dom
TraesCS7D02G346400	fatty acid beta-oxidation	biological_process	GO:0006635	AcylCo_DH/oxidase_C
TraesCS7D02G346400	fatty acid beta-oxidation	biological_process	GO:0006635	AcylCoA_DH/oxidase_NM_dom
TraesCS7D02G346400	fatty acid beta-oxidation	biological_process	GO:0006635	Acyl-CoA_oxidase
TraesCS7D02G346400	fatty acid beta-oxidation	biological_process	GO:0006635	AcylCo_DH-like_C
TraesCS7D02G383600	cellular amino acid metabolic process	biological_process	GO:0006520	PyrdxlP-dep_de-COase
TraesCS7D02G383600	cellular amino acid metabolic process	biological_process	GO:0006520	Aromatic_deC
TraesCS7D02G383600	cellular amino acid metabolic process	biological_process	GO:0006520	PyrdxlP-dep_Trfase_major
TraesCS7D02G383600	cellular amino acid metabolic process	biological_process	GO:0006520	PyrdxlP-dep_Trfase_dom1
TraesCS7D02G383600	cellular amino acid metabolic process	biological_process	GO:0006520	PyrdxlP-dep_Trfase
TraesCS7D02G383600	cellular amino acid metabolic process	biological_process	GO:0006520	Pyridoxal-P_BS
TraesCS7D02G383600	carboxylic acid metabolic process	biological_process	GO:0019752	PyrdxlP-dep_de-COase
TraesCS7D02G383600	carboxylic acid metabolic process	biological_process	GO:0019752	Aromatic_deC
TraesCS7D02G383600	carboxylic acid metabolic process	biological_process	GO:0019752	PyrdxlP-dep_Trfase_major
TraesCS7D02G383600	carboxylic acid metabolic process	biological_process	GO:0019752	PyrdxlP-dep_Trfase_dom1
TraesCS7D02G383600	carboxylic acid metabolic process	biological_process	GO:0019752	PyrdxlP-dep_Trfase
TraesCS7D02G383600	carboxylic acid metabolic process	biological_process	GO:0019752	Pyridoxal-P_BS
TraesCS7D02G533500	cytochrome complex assembly	biological_process	GO:0017004	Cyt_c_assembly
TraesCS7D02G533500	cytochrome complex assembly	biological_process	GO:0017004	Cyt_c_biogenesis_CcmC
TraesCS7D02G533500	heme transport	biological_process	GO:0015886	Cyt_c_assembly
TraesCS7D02G533500	heme transport	biological_process	GO:0015886	Cyt_c_biogenesis_CcmC
TraesCSU02G038800	oxidation-reduction process	biological_process	GO:0055114	Flavin_mOase
TraesCSU02G038800	oxidation-reduction process	biological_process	GO:0055114	FAD/NAD-bd_sf
TraesCSU02G057400	cytochrome complex assembly	biological_process	GO:0017004	Cyt_c_biogenesis_CcmB
TraesCSU02G057400	heme transport	biological_process	GO:0015886	Cyt_c_biogenesis_CcmB
TraesCSU02G106600	translation	biological_process	GO:0006412	Nucleotide-bd_a/b_plait_sf
TraesCSU02G106600	translation	biological_process	GO:0006412	Ribosomal_L23/L15e_core_dom_sf
TraesCSU02G106600	translation	biological_process	GO:0006412	Ribosomal_L25/23
TraesCSU02G150100	translation	biological_process	GO:0006412	Ribosomal_S12_bac
TraesCSU02G150100	translation	biological_process	GO:0006412	Ribosomal_S12/S23
TraesCSU02G150100	translation	biological_process	GO:0006412	NA-bd_OB-fold
TraesCSU02G151300	oxidation-reduction process	biological_process	GO:0055114	Cyt_C_Oxase_1
TraesCSU02G151300	oxidation-reduction process	biological_process	GO:0055114	Cyt_c_oxidase_su1_bac
TraesCSU02G151300	oxidation-reduction process	biological_process	GO:0055114	Cyt_c_Oxase_su1_BS
TraesCSU02G151300	oxidation-reduction process	biological_process	GO:0055114	Cyt_c_oxase-like_su1_dom
TraesCSU02G151300	oxidation-reduction process	biological_process	GO:0055114	Cyt_c_oxase_su1_dom
TraesCSU02G151300	oxidation-reduction process	biological_process	GO:0055114	Cyt_c_oxase-like_su1_sf
TraesCSU02G151300	aerobic respiration	biological_process	GO:0009060	Cyt_C_Oxase_1
TraesCSU02G151300	aerobic respiration	biological_process	GO:0009060	Cyt_c_oxidase_su1_bac
TraesCSU02G151300	aerobic respiration	biological_process	GO:0009060	Cyt_c_Oxase_su1_BS
TraesCSU02G151300	aerobic respiration	biological_process	GO:0009060	Cyt_c_oxase-like_su1_dom
TraesCSU02G151300	aerobic respiration	biological_process	GO:0009060	Cyt_c_oxase_su1_dom
TraesCSU02G151300	aerobic respiration	biological_process	GO:0009060	Cyt_c_oxase-like_su1_sf
TraesCSU02G151300	electron transport chain	biological_process	GO:0022900	Cyt_C_Oxase_1
TraesCSU02G151300	electron transport chain	biological_process	GO:0022900	Cyt_c_oxidase_su1_bac
TraesCSU02G151300	electron transport chain	biological_process	GO:0022900	Cyt_c_Oxase_su1_BS
TraesCSU02G151300	electron transport chain	biological_process	GO:0022900	Cyt_c_oxase-like_su1_dom
TraesCSU02G151300	electron transport chain	biological_process	GO:0022900	Cyt_c_oxase_su1_dom
TraesCSU02G151300	electron transport chain	biological_process	GO:0022900	Cyt_c_oxase-like_su1_sf
TraesCSU02G151300	oxidative phosphorylation	biological_process	GO:0006119	Cyt_C_Oxase_1
TraesCSU02G151300	oxidative phosphorylation	biological_process	GO:0006119	Cyt_c_oxidase_su1_bac
TraesCSU02G151300	oxidative phosphorylation	biological_process	GO:0006119	Cyt_c_Oxase_su1_BS
TraesCSU02G151300	oxidative phosphorylation	biological_process	GO:0006119	Cyt_c_oxase-like_su1_dom
TraesCSU02G151300	oxidative phosphorylation	biological_process	GO:0006119	Cyt_c_oxase_su1_dom
TraesCSU02G151300	oxidative phosphorylation	biological_process	GO:0006119	Cyt_c_oxase-like_su1_sf
TraesCSU02G151300	electron transport coupled proton transport	biological_process	GO:0015990	Cyt_C_Oxase_1
TraesCSU02G151300	electron transport coupled proton transport	biological_process	GO:0015990	Cyt_c_oxidase_su1_bac
TraesCSU02G151300	electron transport coupled proton transport	biological_process	GO:0015990	Cyt_c_Oxase_su1_BS
TraesCSU02G151300	electron transport coupled proton transport	biological_process	GO:0015990	Cyt_c_oxase-like_su1_dom
TraesCSU02G151300	electron transport coupled proton transport	biological_process	GO:0015990	Cyt_c_oxase_su1_dom
TraesCSU02G151300	electron transport coupled proton transport	biological_process	GO:0015990	Cyt_c_oxase-like_su1_sf
TraesCSU02G151300	mitochondrial electron transport, cytochrome c to oxygen	biological_process	GO:0006123	Cyt_C_Oxase_1
TraesCSU02G151300	mitochondrial electron transport, cytochrome c to oxygen	biological_process	GO:0006123	Cyt_c_oxidase_su1_bac
TraesCSU02G151300	mitochondrial electron transport, cytochrome c to oxygen	biological_process	GO:0006123	Cyt_c_Oxase_su1_BS
TraesCSU02G151300	mitochondrial electron transport, cytochrome c to oxygen	biological_process	GO:0006123	Cyt_c_oxase-like_su1_dom
TraesCSU02G151300	mitochondrial electron transport, cytochrome c to oxygen	biological_process	GO:0006123	Cyt_c_oxase_su1_dom
TraesCSU02G151300	mitochondrial electron transport, cytochrome c to oxygen	biological_process	GO:0006123	Cyt_c_oxase-like_su1_sf
TraesCSU02G151300	respiratory electron transport chain	biological_process	GO:0022904	Cyt_C_Oxase_1
TraesCSU02G151300	respiratory electron transport chain	biological_process	GO:0022904	Cyt_c_oxidase_su1_bac
TraesCSU02G151300	respiratory electron transport chain	biological_process	GO:0022904	Cyt_c_Oxase_su1_BS
TraesCSU02G151300	respiratory electron transport chain	biological_process	GO:0022904	Cyt_c_oxase-like_su1_dom
TraesCSU02G151300	respiratory electron transport chain	biological_process	GO:0022904	Cyt_c_oxase_su1_dom
TraesCSU02G151300	respiratory electron transport chain	biological_process	GO:0022904	Cyt_c_oxase-like_su1_sf
TraesCSU02G157000	translation	biological_process	GO:0006412	Ribosomal_S5/S7
TraesCSU02G157000	translation	biological_process	GO:0006412	Ribosomal_S7_bac/org-type
TraesCSU02G157000	translation	biological_process	GO:0006412	Ribosomal_S7_CS
TraesCSU02G157000	translation	biological_process	GO:0006412	Ribosomal_S7_dom
TraesCSU02G157000	translation	biological_process	GO:0006412	Ribosomal_S7_dom_sf
TraesCSU02G157100	oxidation-reduction process	biological_process	GO:0055114	ND/Mrp_mem
TraesCSU02G157100	oxidation-reduction process	biological_process	GO:0055114	NADH-Q_OxRdtase_suN/2
TraesCSU02G157100	ATP synthesis coupled electron transport	biological_process	GO:0042773	ND/Mrp_mem
TraesCSU02G157100	ATP synthesis coupled electron transport	biological_process	GO:0042773	NADH-Q_OxRdtase_suN/2
TraesCSU02G158100	translation	biological_process	GO:0006412	Ribosomal_S5/S7
TraesCSU02G158100	translation	biological_process	GO:0006412	Ribosomal_S7_bac/org-type
TraesCSU02G158100	translation	biological_process	GO:0006412	Ribosomal_S7_dom
TraesCSU02G158100	translation	biological_process	GO:0006412	Ribosomal_S7_dom_sf
TraesCSU02G158700	oxidation-reduction process	biological_process	GO:0055114	Cyt_C_Oxase_1
TraesCSU02G158700	oxidation-reduction process	biological_process	GO:0055114	Cyt_c_oxidase_su1_bac
TraesCSU02G158700	oxidation-reduction process	biological_process	GO:0055114	Cyt_c_Oxase_su1_BS
TraesCSU02G158700	oxidation-reduction process	biological_process	GO:0055114	Cyt_c_oxase-like_su1_dom
TraesCSU02G158700	oxidation-reduction process	biological_process	GO:0055114	Cyt_c_oxase_su1_dom
TraesCSU02G158700	oxidation-reduction process	biological_process	GO:0055114	Cyt_c_oxase-like_su1_sf
TraesCSU02G158700	aerobic respiration	biological_process	GO:0009060	Cyt_C_Oxase_1
TraesCSU02G158700	aerobic respiration	biological_process	GO:0009060	Cyt_c_oxidase_su1_bac
TraesCSU02G158700	aerobic respiration	biological_process	GO:0009060	Cyt_c_Oxase_su1_BS
TraesCSU02G158700	aerobic respiration	biological_process	GO:0009060	Cyt_c_oxase-like_su1_dom
TraesCSU02G158700	aerobic respiration	biological_process	GO:0009060	Cyt_c_oxase_su1_dom
TraesCSU02G158700	aerobic respiration	biological_process	GO:0009060	Cyt_c_oxase-like_su1_sf
TraesCSU02G158700	electron transport coupled proton transport	biological_process	GO:0015990	Cyt_C_Oxase_1
TraesCSU02G158700	electron transport coupled proton transport	biological_process	GO:0015990	Cyt_c_oxidase_su1_bac
TraesCSU02G158700	electron transport coupled proton transport	biological_process	GO:0015990	Cyt_c_Oxase_su1_BS
TraesCSU02G158700	electron transport coupled proton transport	biological_process	GO:0015990	Cyt_c_oxase-like_su1_dom
TraesCSU02G158700	electron transport coupled proton transport	biological_process	GO:0015990	Cyt_c_oxase_su1_dom
TraesCSU02G158700	electron transport coupled proton transport	biological_process	GO:0015990	Cyt_c_oxase-like_su1_sf
TraesCSU02G174100	ATP synthesis coupled proton transport	biological_process	GO:0015986	ATPase_F1/V1/A1_a/bsu_nucl-bd
TraesCSU02G174100	ATP synthesis coupled proton transport	biological_process	GO:0015986	ATP_synth_asu_C
TraesCSU02G174100	ATP synthesis coupled proton transport	biological_process	GO:0015986	ATPase_F1/V1/A1_a/bsu_N
TraesCSU02G174100	ATP synthesis coupled proton transport	biological_process	GO:0015986	ATP_synth_F1_asu
TraesCSU02G174100	ATP synthesis coupled proton transport	biological_process	GO:0015986	ATPase_a/bsu_AS
TraesCSU02G174100	ATP synthesis coupled proton transport	biological_process	GO:0015986	ATP_synth_asu-like_sf
TraesCSU02G174100	ATP synthesis coupled proton transport	biological_process	GO:0015986	P-loop_NTPase
TraesCSU02G174100	ATP synthesis coupled proton transport	biological_process	GO:0015986	ATP_synth_F1_a
TraesCSU02G174100	ATP synthesis coupled proton transport	biological_process	GO:0015986	ATPase_F1/V1/A1_a/bsu_N_sf
TraesCSU02G174100	ATP synthesis coupled proton transport	biological_process	GO:0015986	ATP_synth_asu_C_sf
TraesCSU02G174100	ATP metabolic process	biological_process	GO:0046034	ATPase_F1/V1/A1_a/bsu_nucl-bd
TraesCSU02G174100	ATP metabolic process	biological_process	GO:0046034	ATP_synth_asu_C
TraesCSU02G174100	ATP metabolic process	biological_process	GO:0046034	ATPase_F1/V1/A1_a/bsu_N
TraesCSU02G174100	ATP metabolic process	biological_process	GO:0046034	ATP_synth_F1_asu
TraesCSU02G174100	ATP metabolic process	biological_process	GO:0046034	ATPase_a/bsu_AS
TraesCSU02G174100	ATP metabolic process	biological_process	GO:0046034	ATP_synth_asu-like_sf
TraesCSU02G174100	ATP metabolic process	biological_process	GO:0046034	P-loop_NTPase
TraesCSU02G174100	ATP metabolic process	biological_process	GO:0046034	ATP_synth_F1_a
TraesCSU02G174100	ATP metabolic process	biological_process	GO:0046034	ATPase_F1/V1/A1_a/bsu_N_sf
TraesCSU02G174100	ATP metabolic process	biological_process	GO:0046034	ATP_synth_asu_C_sf
TraesCSU02G174100	proton transmembrane transport	biological_process	GO:1902600	ATPase_F1/V1/A1_a/bsu_nucl-bd
TraesCSU02G174100	proton transmembrane transport	biological_process	GO:1902600	ATP_synth_asu_C
TraesCSU02G174100	proton transmembrane transport	biological_process	GO:1902600	ATPase_F1/V1/A1_a/bsu_N
TraesCSU02G174100	proton transmembrane transport	biological_process	GO:1902600	ATP_synth_F1_asu
TraesCSU02G174100	proton transmembrane transport	biological_process	GO:1902600	ATPase_a/bsu_AS
TraesCSU02G174100	proton transmembrane transport	biological_process	GO:1902600	ATP_synth_asu-like_sf
TraesCSU02G174100	proton transmembrane transport	biological_process	GO:1902600	P-loop_NTPase
TraesCSU02G174100	proton transmembrane transport	biological_process	GO:1902600	ATP_synth_F1_a
TraesCSU02G174100	proton transmembrane transport	biological_process	GO:1902600	ATPase_F1/V1/A1_a/bsu_N_sf
TraesCSU02G174100	proton transmembrane transport	biological_process	GO:1902600	ATP_synth_asu_C_sf
TraesCSU02G174200	ATP synthesis coupled proton transport	biological_process	GO:0015986	ATP_synth_b/b'su_bac/chlpt
TraesCSU02G174300	ATP synthesis coupled proton transport	biological_process	GO:0015986	ATP_synth_F0_csu
TraesCSU02G174300	ATP synthesis coupled proton transport	biological_process	GO:0015986	ATPase_proteolipid_c-like_dom
TraesCSU02G174300	ATP synthesis coupled proton transport	biological_process	GO:0015986	ATP_synth_csu_bac/chlpt
TraesCSU02G174300	ATP synthesis coupled proton transport	biological_process	GO:0015986	F/V-ATP_Csub_sf
TraesCSU02G174300	ATP synthesis coupled proton transport	biological_process	GO:0015986	ATP_synth_F0_csu_sf
TraesCSU02G174300	proton transmembrane transport	biological_process	GO:1902600	ATP_synth_F0_csu
TraesCSU02G174300	proton transmembrane transport	biological_process	GO:1902600	ATPase_proteolipid_c-like_dom
TraesCSU02G174300	proton transmembrane transport	biological_process	GO:1902600	ATP_synth_csu_bac/chlpt
TraesCSU02G174300	proton transmembrane transport	biological_process	GO:1902600	F/V-ATP_Csub_sf
TraesCSU02G174300	proton transmembrane transport	biological_process	GO:1902600	ATP_synth_F0_csu_sf
TraesCSU02G182200	oxidation-reduction process	biological_process	GO:0055114	NADH_UbQ_OxRdtase_chain4L/K
TraesCSU02G182200	oxidation-reduction process	biological_process	GO:0055114	NUOK/Mnh_C1-like
TraesCSU02G182200	ATP synthesis coupled electron transport	biological_process	GO:0042773	NADH_UbQ_OxRdtase_chain4L/K
TraesCSU02G182200	ATP synthesis coupled electron transport	biological_process	GO:0042773	NUOK/Mnh_C1-like
TraesCSU02G184800	translation	biological_process	GO:0006412	Ribosomal_S8
TraesCSU02G184800	translation	biological_process	GO:0006412	Ribosomal_S8_sf
TraesCSU02G190100	oxidation-reduction process	biological_process	GO:0055114	ND/Mrp_mem
TraesCSU02G190100	oxidation-reduction process	biological_process	GO:0055114	NADH-Q_OxRdtase_suN/2
TraesCSU02G190100	ATP synthesis coupled electron transport	biological_process	GO:0042773	ND/Mrp_mem
TraesCSU02G190100	ATP synthesis coupled electron transport	biological_process	GO:0042773	NADH-Q_OxRdtase_suN/2
TraesCSU02G200900	photosynthesis	biological_process	GO:0015979	PSI_PsaA/B
TraesCSU02G200900	photosynthesis	biological_process	GO:0015979	PSI_PsaA
TraesCSU02G200900	photosynthesis	biological_process	GO:0015979	PSI_PsaA/B_CS
TraesCSU02G200900	photosynthesis	biological_process	GO:0015979	PSI_PsaA/B_sf
TraesCSU02G204300	oxidation-reduction process	biological_process	GO:0055114	NADH_UbQ_OxRdtase_su1/FPO
TraesCSU02G214000	translation	biological_process	GO:0006412	Ribosomal_L33
TraesCSU02G214000	translation	biological_process	GO:0006412	Ribosomal_zn-bd
TraesCSU02G214000	translation	biological_process	GO:0006412	L33_sf
TraesCSU02G214100	photosynthesis	biological_process	GO:0015979	PSI_PsaJ
TraesCSU02G214100	photosynthesis	biological_process	GO:0015979	PSI_PsaJ_sf
TraesCSU02G214200	photosynthesis	biological_process	GO:0015979	Cyt_6/f_cplx_su5
TraesCSU02G214200	photosynthesis	biological_process	GO:0015979	Cyt_6/f_cplx_su5_sf
TraesCSU02G214200	cytochrome complex assembly	biological_process	GO:0017004	Cyt_6/f_cplx_su5
TraesCSU02G214200	cytochrome complex assembly	biological_process	GO:0017004	Cyt_6/f_cplx_su5_sf
TraesCSU02G214200	oxidation-reduction process	biological_process	GO:0055114	Cyt_6/f_cplx_su5
TraesCSU02G214200	oxidation-reduction process	biological_process	GO:0055114	Cyt_6/f_cplx_su5_sf
TraesCSU02G214200	electron transport chain	biological_process	GO:0022900	Cyt_6/f_cplx_su5
TraesCSU02G214200	electron transport chain	biological_process	GO:0022900	Cyt_6/f_cplx_su5_sf
TraesCSU02G221700	oxidation-reduction process	biological_process	GO:0055114	NADH_plast_OxRdtase_su_I
TraesCSU02G221700	oxidation-reduction process	biological_process	GO:0055114	NADH_quinone_OxRdtase_chainI
TraesCSU02G221700	oxidation-reduction process	biological_process	GO:0055114	4Fe4S_Fe-S-bd
TraesCSU02G221700	oxidation-reduction process	biological_process	GO:0055114	4Fe4S_Fe_S_CS
TraesCSU02G234000	ATP synthesis coupled proton transport	biological_process	GO:0015986	ATPase_F1/V1/A1_a/bsu_nucl-bd
TraesCSU02G234000	ATP synthesis coupled proton transport	biological_process	GO:0015986	ATP_synth_asu_C
TraesCSU02G234000	ATP synthesis coupled proton transport	biological_process	GO:0015986	ATPase_a/bsu_AS
TraesCSU02G234000	ATP synthesis coupled proton transport	biological_process	GO:0015986	P-loop_NTPase
TraesCSU02G234000	ATP synthesis coupled proton transport	biological_process	GO:0015986	ATP_synth_asu_C_sf
TraesCSU02G237200	oxidation-reduction process	biological_process	GO:0055114	NADH_Q_OxRdtase_suD
TraesCSU02G237200	oxidation-reduction process	biological_process	GO:0055114	NADH_UbQ_OxRdtase_49kDa_CS
TraesCSU02G237200	oxidation-reduction process	biological_process	GO:0055114	NDH1_su_D/H
TraesCSU02G237200	oxidation-reduction process	biological_process	GO:0055114	NiFe-Hase_large
TraesCSU02G237200	oxidation-reduction process	biological_process	GO:0055114	NADH_Q_OxRdtase_suD_sf
TraesCSU02G237300	translation	biological_process	GO:0006412	Ribosomal_S15
TraesCSU02G237300	translation	biological_process	GO:0006412	Ribosomal_S15_bac-type
TraesCSU02G237300	translation	biological_process	GO:0006412	S15_NS1_RNA-bd
TraesCSU02G238800	translation	biological_process	GO:0006412	Ribosomal_S15
TraesCSU02G238800	translation	biological_process	GO:0006412	Ribosomal_S15_bac-type
TraesCSU02G238800	translation	biological_process	GO:0006412	S15_NS1_RNA-bd
TraesCSU02G239700	ATP synthesis coupled proton transport	biological_process	GO:0015986	ATP_synth_b/b'su_bac/chlpt
TraesCSU02G243000	translation	biological_process	GO:0006412	Ribosomal_S15
TraesCSU02G243000	translation	biological_process	GO:0006412	Ribosomal_S15_bac-type
TraesCSU02G243000	translation	biological_process	GO:0006412	S15_NS1_RNA-bd
TraesCSU02G245600	oxidation-reduction process	biological_process	GO:0055114	NADH_UbQ_OxRdtase_chain4L/K
TraesCSU02G245600	oxidation-reduction process	biological_process	GO:0055114	NUOK/Mnh_C1-like
TraesCSU02G245600	ATP synthesis coupled electron transport	biological_process	GO:0042773	NADH_UbQ_OxRdtase_chain4L/K
TraesCSU02G245600	ATP synthesis coupled electron transport	biological_process	GO:0042773	NUOK/Mnh_C1-like
TraesCSU02G245600	photosynthesis, light reaction	biological_process	GO:0019684	NADH_UbQ_OxRdtase_chain4L/K
TraesCSU02G245600	photosynthesis, light reaction	biological_process	GO:0019684	NUOK/Mnh_C1-like
TraesCSU02G246100	translation	biological_process	GO:0006412	Ribosomal_L32p
TraesCSU02G246100	translation	biological_process	GO:0006412	Ribosomal_zn-bd
TraesCSU02G258800	photosynthesis	biological_process	GO:0015979	Cyt_6/f_cplx_su5
TraesCSU02G258800	photosynthesis	biological_process	GO:0015979	Cyt_6/f_cplx_su5_sf
TraesCSU02G258800	cytochrome complex assembly	biological_process	GO:0017004	Cyt_6/f_cplx_su5
TraesCSU02G258800	cytochrome complex assembly	biological_process	GO:0017004	Cyt_6/f_cplx_su5_sf
TraesCSU02G258800	oxidation-reduction process	biological_process	GO:0055114	Cyt_6/f_cplx_su5
TraesCSU02G258800	oxidation-reduction process	biological_process	GO:0055114	Cyt_6/f_cplx_su5_sf
TraesCSU02G258800	electron transport chain	biological_process	GO:0022900	Cyt_6/f_cplx_su5
TraesCSU02G258800	electron transport chain	biological_process	GO:0022900	Cyt_6/f_cplx_su5_sf
TraesCSU02G259500	translation	biological_process	GO:0006412	Ribosomal_S5/S7
TraesCSU02G259500	translation	biological_process	GO:0006412	Ribosomal_S7_bac/org-type
TraesCSU02G259500	translation	biological_process	GO:0006412	Ribosomal_S7_CS
TraesCSU02G259500	translation	biological_process	GO:0006412	Ribosomal_S7_dom
TraesCSU02G259500	translation	biological_process	GO:0006412	Ribosomal_S7_dom_sf
TraesCSU02G259800	translation	biological_process	GO:0006412	Ribosomal_S11
TraesCSU02G259800	translation	biological_process	GO:0006412	Ribosomal_S11_CS
TraesCSU02G259800	translation	biological_process	GO:0006412	Ribosomal_S11_sf
TraesCSU02G259800	ribosomal small subunit assembly	biological_process	GO:0000028	Ribosomal_S11
TraesCSU02G259800	ribosomal small subunit assembly	biological_process	GO:0000028	Ribosomal_S11_CS
TraesCSU02G259800	ribosomal small subunit assembly	biological_process	GO:0000028	Ribosomal_S11_sf
TraesCSU02G259800	maturation of SSU-rRNA from tricistronic rRNA transcript (SSU-rRNA, 5.8S rRNA, LSU-rRNA)	biological_process	GO:0000462	Ribosomal_S11
TraesCSU02G259800	maturation of SSU-rRNA from tricistronic rRNA transcript (SSU-rRNA, 5.8S rRNA, LSU-rRNA)	biological_process	GO:0000462	Ribosomal_S11_CS
TraesCSU02G259800	maturation of SSU-rRNA from tricistronic rRNA transcript (SSU-rRNA, 5.8S rRNA, LSU-rRNA)	biological_process	GO:0000462	Ribosomal_S11_sf
TraesCSU02G260900	photosynthesis	biological_process	GO:0015979	PSI_PsaJ
TraesCSU02G260900	photosynthesis	biological_process	GO:0015979	PSI_PsaJ_sf
TraesCSU02G261000	translation	biological_process	GO:0006412	Ribosomal_L33
TraesCSU02G261000	translation	biological_process	GO:0006412	Ribosomal_zn-bd
TraesCSU02G261000	translation	biological_process	GO:0006412	L33_sf
TraesCSU02G261700	oxidation-reduction process	biological_process	GO:0055114	NADH_UbQ_OxRdtase_su1/FPO
TraesCSU02G261700	photosynthesis, light reaction	biological_process	GO:0019684	NADH_UbQ_OxRdtase_su1/FPO
TraesCSU02G261700	aerobic respiration	biological_process	GO:0009060	NADH_UbQ_OxRdtase_su1/FPO
TraesCSU02G262800	translation	biological_process	GO:0006412	Ribosomal_L32p
TraesCSU02G262800	translation	biological_process	GO:0006412	Ribosomal_zn-bd
TraesCSU02G264600	translation	biological_process	GO:0006412	Ribosomal_S15
TraesCSU02G264600	translation	biological_process	GO:0006412	Ribosomal_S15_bac-type
TraesCSU02G264600	translation	biological_process	GO:0006412	S15_NS1_RNA-bd
TraesCSU02G266100	photosynthesis	biological_process	GO:0015979	PSI_PsaJ
TraesCSU02G266100	photosynthesis	biological_process	GO:0015979	PSI_PsaJ_sf
TraesCSU02G266900	proteolysis	biological_process	GO:0006508	ClpP
TraesCSU02G266900	proteolysis	biological_process	GO:0006508	ClpP/TepA
TraesCSU02G266900	proteolysis	biological_process	GO:0006508	ClpP/crotonase-like_dom_sf
TraesCSU02G266900	proteolysis	biological_process	GO:0006508	ClpP_His_AS
TraesCSU02G267600	translation	biological_process	GO:0006412	Ribosomal_L20
TraesCSU02G267600	translation	biological_process	GO:0006412	Ribosomal_protein_L20_C
TraesCSU02G267600	ribosomal large subunit assembly	biological_process	GO:0000027	Ribosomal_L20
TraesCSU02G267600	ribosomal large subunit assembly	biological_process	GO:0000027	Ribosomal_protein_L20_C
TraesCSU02G268000	photosynthesis	biological_process	GO:0015979	PSI_PsaI
TraesCSU02G268000	photosynthesis	biological_process	GO:0015979	PSI_PsaI_sf
TraesCSU02G268800	photosynthesis	biological_process	GO:0015979	PSI_PsaJ
TraesCSU02G268800	photosynthesis	biological_process	GO:0015979	PSI_PsaJ_sf
TraesCSU02G268900	translation	biological_process	GO:0006412	Ribosomal_L33
TraesCSU02G268900	translation	biological_process	GO:0006412	Ribosomal_zn-bd
TraesCSU02G268900	translation	biological_process	GO:0006412	Ribosomal_L33_CS
TraesCSU02G268900	translation	biological_process	GO:0006412	L33_sf
TraesCSU02G269000	ATP synthesis coupled proton transport	biological_process	GO:0015986	ATP_synth_F0_csu
TraesCSU02G269000	ATP synthesis coupled proton transport	biological_process	GO:0015986	ATPase_proteolipid_c-like_dom
TraesCSU02G269000	ATP synthesis coupled proton transport	biological_process	GO:0015986	ATP_synth_csu_bac/chlpt
TraesCSU02G269000	ATP synthesis coupled proton transport	biological_process	GO:0015986	ATP_synth_F0_csu_DDCD_BS
TraesCSU02G269000	ATP synthesis coupled proton transport	biological_process	GO:0015986	F/V-ATP_Csub_sf
TraesCSU02G269000	ATP synthesis coupled proton transport	biological_process	GO:0015986	ATP_synth_F0_csu_sf
TraesCSU02G269000	proton transmembrane transport	biological_process	GO:1902600	ATP_synth_F0_csu
TraesCSU02G269000	proton transmembrane transport	biological_process	GO:1902600	ATPase_proteolipid_c-like_dom
TraesCSU02G269000	proton transmembrane transport	biological_process	GO:1902600	ATP_synth_csu_bac/chlpt
TraesCSU02G269000	proton transmembrane transport	biological_process	GO:1902600	ATP_synth_F0_csu_DDCD_BS
TraesCSU02G269000	proton transmembrane transport	biological_process	GO:1902600	F/V-ATP_Csub_sf
TraesCSU02G269000	proton transmembrane transport	biological_process	GO:1902600	ATP_synth_F0_csu_sf
TraesCSU02G269100	photosynthesis	biological_process	GO:0015979	PSII_PsbH
TraesCSU02G269100	photosynthesis	biological_process	GO:0015979	PSII_PsbH_sf
TraesCSU02G269100	protein stabilization	biological_process	GO:0050821	PSII_PsbH
TraesCSU02G269100	protein stabilization	biological_process	GO:0050821	PSII_PsbH_sf
TraesCSU02G269200	photosynthesis	biological_process	GO:0015979	PSII_PsbN
TraesCSU02G269700	oxidation-reduction process	biological_process	GO:0055114	NADH_UbQ_OxRdtase_chain4L/K
TraesCSU02G269700	oxidation-reduction process	biological_process	GO:0055114	NUOK/Mnh_C1-like
TraesCSU02G269700	ATP synthesis coupled electron transport	biological_process	GO:0042773	NADH_UbQ_OxRdtase_chain4L/K
TraesCSU02G269700	ATP synthesis coupled electron transport	biological_process	GO:0042773	NUOK/Mnh_C1-like
TraesCSU02G270200	translation	biological_process	GO:0006412	Ribosomal_L22
TraesCSU02G270200	translation	biological_process	GO:0006412	Ribosomal_L22_bac/chlpt-type
TraesCSU02G270200	translation	biological_process	GO:0006412	Ribosomal_L22/L17_sf
TraesCSU02G270600	photosynthesis	biological_process	GO:0015979	PSII_PsbJ
TraesCSU02G270600	photosynthesis	biological_process	GO:0015979	PSII_PsbJ_sf
TraesCS1A02G130100	chloroplast	cellular_component	GO:0009507	DNA-dir_RNA_pol_insert
TraesCS1A02G130100	chloroplast	cellular_component	GO:0009507	DNA-dir_RNA_pol_RpoA/D/Rpb3
TraesCS1A02G130100	chloroplast	cellular_component	GO:0009507	RBP11-like
TraesCS1A02G130100	chloroplast	cellular_component	GO:0009507	RNApol_insert_sf
TraesCS1A02G130100	plastid	cellular_component	GO:0009536	DNA-dir_RNA_pol_insert
TraesCS1A02G130100	plastid	cellular_component	GO:0009536	DNA-dir_RNA_pol_RpoA/D/Rpb3
TraesCS1A02G130100	plastid	cellular_component	GO:0009536	RBP11-like
TraesCS1A02G130100	plastid	cellular_component	GO:0009536	RNApol_insert_sf
TraesCS1A02G157200	chloroplast	cellular_component	GO:0009507	ND/Mrp_mem
TraesCS1A02G157200	chloroplast	cellular_component	GO:0009507	NADH-Q_OxRdtase_suN/2
TraesCS1A02G157200	thylakoid	cellular_component	GO:0009579	ND/Mrp_mem
TraesCS1A02G157200	thylakoid	cellular_component	GO:0009579	NADH-Q_OxRdtase_suN/2
TraesCS1A02G157200	integral component of membrane	cellular_component	GO:0016021	ND/Mrp_mem
TraesCS1A02G157200	integral component of membrane	cellular_component	GO:0016021	NADH-Q_OxRdtase_suN/2
TraesCS1A02G157200	chloroplast thylakoid membrane	cellular_component	GO:0009535	ND/Mrp_mem
TraesCS1A02G157200	chloroplast thylakoid membrane	cellular_component	GO:0009535	NADH-Q_OxRdtase_suN/2
TraesCS1A02G157200	membrane	cellular_component	GO:0016020	ND/Mrp_mem
TraesCS1A02G157200	membrane	cellular_component	GO:0016020	NADH-Q_OxRdtase_suN/2
TraesCS1A02G157200	plastid	cellular_component	GO:0009536	ND/Mrp_mem
TraesCS1A02G157200	plastid	cellular_component	GO:0009536	NADH-Q_OxRdtase_suN/2
TraesCS1A02G384400	integral component of membrane	cellular_component	GO:0016021	NADH_UbQ/plastoQ_OxRdtase_su3
TraesCS1A02G384400	integral component of membrane	cellular_component	GO:0016021	NAD(P)H_OxRDtase_bac/plastid
TraesCS1A02G384400	integral component of membrane	cellular_component	GO:0016021	NDAH_ubi_oxred_su3_sf
TraesCS1A02G384400	chloroplast thylakoid membrane	cellular_component	GO:0009535	NADH_UbQ/plastoQ_OxRdtase_su3
TraesCS1A02G384400	chloroplast thylakoid membrane	cellular_component	GO:0009535	NAD(P)H_OxRDtase_bac/plastid
TraesCS1A02G384400	chloroplast thylakoid membrane	cellular_component	GO:0009535	NDAH_ubi_oxred_su3_sf
TraesCS1A02G384400	chloroplast	cellular_component	GO:0009507	NADH_UbQ/plastoQ_OxRdtase_su3
TraesCS1A02G384400	chloroplast	cellular_component	GO:0009507	NAD(P)H_OxRDtase_bac/plastid
TraesCS1A02G384400	chloroplast	cellular_component	GO:0009507	NDAH_ubi_oxred_su3_sf
TraesCS1A02G384400	thylakoid	cellular_component	GO:0009579	NADH_UbQ/plastoQ_OxRdtase_su3
TraesCS1A02G384400	thylakoid	cellular_component	GO:0009579	NAD(P)H_OxRDtase_bac/plastid
TraesCS1A02G384400	thylakoid	cellular_component	GO:0009579	NDAH_ubi_oxred_su3_sf
TraesCS1A02G384400	membrane	cellular_component	GO:0016020	NADH_UbQ/plastoQ_OxRdtase_su3
TraesCS1A02G384400	membrane	cellular_component	GO:0016020	NAD(P)H_OxRDtase_bac/plastid
TraesCS1A02G384400	membrane	cellular_component	GO:0016020	NDAH_ubi_oxred_su3_sf
TraesCS1A02G384400	plastid	cellular_component	GO:0009536	NADH_UbQ/plastoQ_OxRdtase_su3
TraesCS1A02G384400	plastid	cellular_component	GO:0009536	NAD(P)H_OxRDtase_bac/plastid
TraesCS1A02G384400	plastid	cellular_component	GO:0009536	NDAH_ubi_oxred_su3_sf
TraesCS1A02G384600	integral component of membrane	cellular_component	GO:0016021	PSII_PsbK
TraesCS1A02G384600	integral component of membrane	cellular_component	GO:0016021	PSII_PsbK_sf
TraesCS1A02G384600	chloroplast thylakoid membrane	cellular_component	GO:0009535	PSII_PsbK
TraesCS1A02G384600	chloroplast thylakoid membrane	cellular_component	GO:0009535	PSII_PsbK_sf
TraesCS1A02G384600	photosystem II reaction center	cellular_component	GO:0009539	PSII_PsbK
TraesCS1A02G384600	photosystem II reaction center	cellular_component	GO:0009539	PSII_PsbK_sf
TraesCS1A02G384600	photosystem II	cellular_component	GO:0009523	PSII_PsbK
TraesCS1A02G384600	photosystem II	cellular_component	GO:0009523	PSII_PsbK_sf
TraesCS1A02G384600	chloroplast	cellular_component	GO:0009507	PSII_PsbK
TraesCS1A02G384600	chloroplast	cellular_component	GO:0009507	PSII_PsbK_sf
TraesCS1A02G384600	thylakoid	cellular_component	GO:0009579	PSII_PsbK
TraesCS1A02G384600	thylakoid	cellular_component	GO:0009579	PSII_PsbK_sf
TraesCS1A02G384600	membrane	cellular_component	GO:0016020	PSII_PsbK
TraesCS1A02G384600	membrane	cellular_component	GO:0016020	PSII_PsbK_sf
TraesCS1A02G384600	plastid	cellular_component	GO:0009536	PSII_PsbK
TraesCS1A02G384600	plastid	cellular_component	GO:0009536	PSII_PsbK_sf
TraesCS1A02G385000	integral component of membrane	cellular_component	GO:0016021	PSI_PsaI
TraesCS1A02G385000	integral component of membrane	cellular_component	GO:0016021	PSI_PsaI_sf
TraesCS1A02G385000	chloroplast thylakoid membrane	cellular_component	GO:0009535	PSI_PsaI
TraesCS1A02G385000	chloroplast thylakoid membrane	cellular_component	GO:0009535	PSI_PsaI_sf
TraesCS1A02G385000	photosystem I	cellular_component	GO:0009522	PSI_PsaI
TraesCS1A02G385000	photosystem I	cellular_component	GO:0009522	PSI_PsaI_sf
TraesCS1A02G385000	chloroplast	cellular_component	GO:0009507	PSI_PsaI
TraesCS1A02G385000	chloroplast	cellular_component	GO:0009507	PSI_PsaI_sf
TraesCS1A02G385000	thylakoid	cellular_component	GO:0009579	PSI_PsaI
[truncated: 5,096 more rows]
